# Supplementary material for: Trans regulation of an odorant binding protein by a proto-Y chromosome affects male courtship in house fly
Source: eLife. 2024 Oct 18;13:e90349. doi: 10.7554/eLife.90349 (PMC11488852; doi:10.7554/eLife.90349)
Supplement: Supplementary file 1. [file elife-90349-supp1.xlsx]

## Sheet: SuppFile1A
Supplementary File 1A - List of house fly samples used for RNA-seq analyses.
Sample	NCBI Accession No.	Experiment Batch	Male Type	Genetic Strain
B10_2013_MH_1	GSM1637981	A	Ym	CSaY
B10_2013_MH_2	GSM1637982	A	Ym	CSaY
B10_2013_MH_3	GSM1637983	A	Ym	CSaY
bwbCS_MH_1	GSM3611221	B	Ym	bwbCS xCS
bwbCS_MH_2	GSM3611222	B	Ym	bwbCS xCS
bwbCS_MH_3	GSM3611223	B	Ym	bwbCS xCS
IsoCS_MH_1	GSM3611230	B	Ym	IsoCS
IsoCS_MH_2	GSM3611231	B	Ym	IsoCS
IsoCS_MH_3	GSM3611232	B	Ym	IsoCS
CS_2013_MH_1	GSM1637977	A	IIIm	CS
CS_2013_MH_2	GSM1637978	A	IIIm	CS
CS_2013_MH_3	GSM1637979	A	IIIm	CS
CS_MH_1	GSM3611224	B	IIIm	CS
CS_MH_2	GSM3611225	B	IIIm	CS
CS_MH_3	GSM3611226	B	IIIm	CS
CSrab_MH_1	GSM3611227	B	IIIm	Csrab
CSrab_MH_2	GSM3611228	B	IIIm	Csrab
CSrab_MH_3	GSM3611229	B	IIIm	Csrab
GFP_MH_1	GSM3611341	C	IIIm	pw bwb
GFP_MH_2	GSM3611342	C	IIIm	pw bwb
GFP_MH_3	GSM3611343	C	IIIm	pw bwb
tra_MH_1	GSM3611347	C	IIIm	pw bwb
tra_MH_2	GSM3611348	C	IIIm	pw bwb
tra_MH_3	GSM3611349	C	IIIm	pw bwb

## Sheet: SuppFile1B
Supplementary File 1B - List of Drosophila melanogaster samples used for tissue-specific expression analysis.
Sample type	Method	Measurement	Citation	Notes
larval CNS	microarray	Mean signal intensity for all probes of a gene	FlyAtlas (Chintapalli et al. 2007)
antennal imaginal disc (larval)	RNA-seq	Normalized counts per transcript	GSE75986 (Pan et al. 2017)	wild-type samples
pupal antenna (8h)	RNA-seq	Normalized counts per transcript	GSE75986 (Pan et al. 2017)	wild-type samples
pupal antenna (40h)	RNA-seq	Normalized counts per transcript	GSE75986 (Pan et al. 2017)	wild-type samples
head (adult)	microarray	Mean signal intensity for all probes of a gene	FlyAtlas (Chintapalli et al. 2007)
eye (adult)	microarray	Mean signal intensity for all probes of a gene	FlyAtlas (Chintapalli et al. 2007)
brain (adult)	microarray	Mean signal intensity for all probes of a gene	FlyAtlas (Chintapalli et al. 2007)
antenna (adult)	RNA-seq	Normalized counts per transcript	GSE75986 (Pan et al. 2017)	wild-type samples
antenna (adult, male)	RNA-seq	FPKM per gene	GSM2645722 (Shiao et al. 2013)
antenna (adult, female)	RNA-seq	FPKM per gene	GSM2645723 (Shiao et al. 2013)
antenna (adult, isolated)	RNA-seq	TPM per transcript	GSE179213	white-eyed social isolation
antenna (adult, group)	RNA-seq	TPM per transcript	GSE179213	white-eyed group housed
antennal third segment (adult)	RNA-seq	Normalized counts per gene	PRJNA532415 (Mohapatra and Menuz 2019)	Wild-type (Canton S)
antennal third segment (adult)	RNA-seq	TPM per gene	(Menuz et al. 2014)	Only wild-type samples
labellum (adult proboscis)	RNA-seq	TPM per transcript	GSE113159 (May et al. 2019)	Wild-type Normal diet

## Sheet: SuppFile1C
Supplementary File 1C - List of genes differentially expressed between IIIM and YM male house fly head samples, according to limma (FDR < 0.05).
Transcript ID	D. melanogaster ortholog	logFC (IIIm:Ym)	t-statistic	Muller Element	LOC	adj.P.Val
XM_020035863	CG4282	-0.533027	-9.29024	A	LOC101901076	0.000136148
XM_020039296	Cbp80	-0.62257	-9.09765	NA	LOC101899892	0.000136148
XM_020035273	ss	-1.08215	-8.70782	NA	LOC109611884	0.000184056
XM_011297023	ssp7	1.60981	8.55242	NA	LOC105262326	0.000184056
XM_011293343	CG15073	-0.522773	-8.00164	NA	LOC105261698	0.000418141
XM_005179734	GNBP3	-1.50873	-7.11144	B	LOC101887442	0.00205049
XM_005179904	nopo	-0.404289	-6.92473	A	LOC101888119	0.00258356
XM_020038685	CG11560	-0.790523	-6.69887	NA	LOC109613632	0.00362516
XM_011296129	CG10514	2.26264	6.32649	NA	LOC105262120	0.00676045
XM_005180935	AnxB10	0.496973	6.30189	A	LOC101897906	0.00676045
XM_005179905	nopo	-0.775187	-6.2466	A	LOC101888295	0.00692582
XR_002195241	Nle	2.04708	6.06147	NA	NA	0.00949835
XR_002194658	Dhc93AB	0.562216	5.93377	NA	NA	0.0116047
XM_011294919	Obp56h	-0.757533	-5.87723	NA	LOC105261916	0.0122075
XM_005185373	CG32544	0.597866	5.81972	A	LOC101897757	0.0129404
XM_005185928	Naxe	0.914382	5.75665	A	LOC101896079	0.0139551
XM_005186071	Ldsdh1	-0.506471	-5.6877	A	LOC101891656	0.0150473
XM_005191341	CG30281	-0.608956	-5.66999	NA	LOC101900813	0.0150473
XR_002195524	#N/A	0.482055	5.6204	NA	NA	0.0159273
XM_020039220	CG8745	2.21307	5.58125	NA	LOC101887703	0.0160375
XM_020038684	CG34116	-1.03577	-5.57267	NA	LOC101900110	0.0160375
XM_011294276	hng2	0.37809	5.45485	NA	LOC105261813	0.019957
XM_005183298	CG9993	-1.12705	-5.42124	NA	LOC101887630	0.0205949
XM_005186743	gd	0.742515	5.36657	A	LOC101893264	0.022336
XM_011293656	p115	-0.354384	-5.27609	NA	LOC105261736	0.0263314
XM_005185514	CG2120	1.32563	5.1727	A	LOC101893651	0.0320476
XM_005185517	CG6654	-0.37037	-5.13913	A	LOC101894337	0.0333213
XM_005191816	CG12344	-0.531672	-5.10331	C	LOC101901163	0.0348764
XR_002194939	mt:ND1	-0.432986	-5.08617	NA	NA	0.0350221
XM_005176676	SCCRO4	1.13196	5.03107	D	LOC101893124	0.0373656
XM_011296001	CG11655	0.846257	4.99194	A	LOC101890383	0.0373656
NM_001286898	GstS1	1.03114	4.98525	NA	GST	0.0373656
XM_005180470	geko	-0.377838	-4.98365	D	LOC101894424	0.0373656
XM_011296127	CG10513	-0.615004	-4.96948	E	LOC101893440	0.0373656
XM_020037474	Gr98c	0.859234	4.96803	A	LOC101894501	0.0373656
XM_011296063	CG13616	0.35839	4.94949	E	LOC101901039	0.0373656
XM_020036961	CG11655	0.447969	4.94351	A	LOC101894383	0.0373656
XM_020035803	prominin-like	-0.719083	-4.94035	D	LOC101900316	0.0373656
XM_005181494	Zcchc7	0.5758	4.821	NA	LOC101891280	0.0479521
XM_005178407	krimp	-0.348245	-4.80078	C	LOC101887890	0.0489916
XM_005190182	CheB53a	-0.402112	-4.69834	NA	LOC101896845	0.0590976
XR_891408	CG15570	0.500738	4.69694	NA	NA	0.0590976
XM_005176088	Tlk	-0.744353	-4.68863	A	LOC101898175	0.0590976
XM_005186407	Adgf-D	1.38325	4.67437	E	LOC101890439	0.0596973
XM_005190192	Taf10	-1.22363	-4.6206	NA	LOC101898393	0.0661368
XM_011294922	Obp56h	-1.30361	-4.57716	C	LOC101891822	0.0711906
XM_005178198	CG14286	-0.25901	-4.57023	A	LOC101896976	0.0711906
XM_011294921	Obp56h	-0.802007	-4.46267	C	LOC101891651	0.0895535
XM_011296915	#N/A	0.408952	4.4476	NA	NA	0.0908629
XM_020034720	Syp	-0.567753	-4.43406	E	LOC101893240	0.0919045
XM_020036781	Neb-cGP	-2.30419	-4.41121	A	LOC101900554	0.0944153
XM_005183283	CG14615	-0.357645	-4.40373	A	LOC101899689	0.0944153
XM_005182494	Vha100-2	0.425849	4.38613	E	LOC101900321	0.0944153
XM_020038803	sni	1.04807	4.38274	NA	LOC101896952	0.0944153
XM_005179896	Nepl21	0.622281	4.38166	E	LOC101901517	0.0944153
XM_011296128	CG10513	-0.596934	-4.36245	NA	LOC105262119	0.0969822
XM_011298123	CG9289	0.264017	4.34861	NA	LOC105262574	0.0984096
XM_011294372	Cyp6a16	-0.592004	-4.32502	NA	LOC105261829	0.101241
XM_020037048	HIPP1	-1.01181	-4.3217	C	LOC101887966	0.101241
XM_005185367	Decay	0.454995	4.27705	A	LOC101896713	0.110502
XR_002194317	Mvl	-0.550838	-4.26593	NA	NA	0.111552
XM_005191616	CG30120	-0.433233	-4.24119	C	LOC101892529	0.116285
XM_011292889	#N/A	-1.49377	-4.21975	NA	NA	0.1186
XM_005187340	AspRS	0.542267	4.21918	C	LOC101893490	0.1186
XM_011295567	CG4789	-0.646343	-4.18464	A	LOC101896358	0.121308
XM_020038783	CG30428	-0.24331	-4.1838	A	LOC101891028	0.121308
XM_020035450	Phlpp	-0.470261	-4.18296	B	LOC101888993	0.121308
XM_005180411	Vlet	0.439742	4.17755	A	LOC101900078	0.121308
XM_005184152	CG1998	0.330869	4.16863	A	LOC101889478	0.121308
XM_005183616	Hmg-2	-0.781543	-4.16738	A	LOC101900731	0.121308
XM_020038328	pum	-0.605144	-4.16514	E	LOC101891540	0.121308
XM_011295425	Adgf-D	1.31765	4.14925	E	LOC101890439	0.124152
XM_020039635	Or45a	0.757224	4.13099	NA	LOC101891495	0.127794
XM_005191557	CG4577	-1.14536	-4.11016	NA	LOC101894516	0.132362
XM_005185939	Mgstl	0.948835	4.09006	A	LOC101897863	0.136883
XM_005188830	fln	0.528228	4.08251	D	LOC101898847	0.137486
XM_020035702	CRMP	-1.78342	-4.07614	NA	LOC101895117	0.137739
XM_020037059	rgr	-0.256835	-4.06148	NA	LOC109612725	0.140714
XR_891754	CG15279	0.908689	4.04774	NA	NA	0.141139
XM_005183408	CG10562	-0.302536	-4.04696	E	LOC101894433	0.141139
XM_020039119	Obp28a	-0.458188	-4.04052	NA	LOC101896957	0.141139
XM_011295022	Grip	-0.418209	-4.03229	A	LOC101895038	0.141139
XM_020034897	Csk	-0.970541	-4.02538	E	LOC101896156	0.141139
XM_011294561	vers	0.347454	4.02538	NA	LOC105261857	0.141139
XM_005183376	Cyp308a1	0.613982	4.02345	A	LOC101900906	0.141139
XM_005175243	CG4025	-1.60639	-4.01369	NA	LOC101896146	0.142718
XM_005175350	CG30281	0.987407	4.00574	E	LOC101900816	0.143726
XM_005175427	NT5E-2	0.461824	3.99728	NA	LOC101900817	0.144496
XM_011292855	ssp7	-0.237508	-3.99373	NA	LOC105261616	0.144496
XR_002194050	sdk	-0.287285	-3.98084	NA	NA	0.147265
XM_005188744	CG13063	0.564922	3.95918	D	LOC101897247	0.152915
XR_225456	CG14562	-0.389719	-3.95164	NA	NA	0.152915
XR_002195113	#N/A	-0.225159	-3.95071	NA	NA	0.152915
XM_005183137	tth	0.273421	3.93579	A	LOC101888131	0.156657
XM_020036907	IFT54	0.617886	3.92585	E	LOC101901754	0.158649
XM_005177554	RfC3	-0.282038	-3.91406	A	LOC101887938	0.161385
XR_891818	Ptp69D	0.498516	3.89862	NA	NA	0.164633
XM_005180330	CG3918	0.536257	3.89671	A	LOC101901135	0.164633
XM_005185989	Pur-alpha	0.502532	3.88463	F	LOC101890893	0.167633
XR_002194648	Usp32	-0.325827	-3.87547	NA	NA	0.169549
XM_005178809	dpn	-0.281649	-3.85229	C	LOC101895648	0.174506
XM_005177827	CG4880	-0.387444	-3.84867	A	LOC101893001	0.174506
XM_005186334	CG11035	0.343839	3.84691	A	LOC101892453	0.174506
XM_020038280	CG13850	0.477659	3.84633	E	LOC101892232	0.174506
XM_011294036	Nhe3	-0.433885	-3.82992	B	LOC101901309	0.179597
XM_020037130	CG4282	0.74126	3.81272	NA	LOC109612782	0.185185
XM_011297609	CG11099	-0.345145	-3.80871	C	LOC101899895	0.185185
XM_005187243	Vamp7	-0.29396	-3.79564	C	LOC101891712	0.187535
XM_020036397	CG30460	0.4231	3.78595	C	LOC101889476	0.187535
XR_002195000	CG30428	-0.253225	-3.78567	NA	NA	0.187535
XM_005192165	PRL-1	-0.472523	-3.78388	NA	LOC101892937	0.187535
XM_005185434	Hexo1	-0.46668	-3.77623	D	LOC101894273	0.187535
XM_005177485	arx	-0.384241	-3.77561	A	LOC101890638	0.187535
XM_005178535	ImpE3	-0.267998	-3.7728	E	LOC101895415	0.187535
XM_005175151	Ugt35B1	2.15094	3.7724	NA	LOC101892938	0.187535
XM_020039012	CG7222	0.387008	3.76573	NA	LOC101899031	0.188293
XM_005177237	CG3566	-0.322082	-3.75709	A	LOC101895524	0.188293
XM_005178912	CG15343	0.974756	3.75701	A	LOC101899961	0.188293
XM_005179624	Tsp42Ef	0.384083	3.75325	C	LOC101898127	0.188293
XM_020037516	Vps13D	-0.31474	-3.75177	NA	LOC109612976	0.188293
XM_020039971	#N/A	1.26754	3.74886	NA	NA	0.188293
XM_005179334	Tomosyn	1.18482	3.73916	A	LOC101895597	0.191022
XM_020035523	CG2124	-0.272989	-3.73056	A	LOC101894698	0.193304
XR_891566	Zcchc7	0.71865	3.71928	NA	NA	0.196854
XM_005187105	Arp6	-0.337675	-3.68696	A	LOC101897474	0.204469
XM_005188048	Adi1	1.37611	3.68433	D	LOC101898383	0.204469
XM_005175220	ATPsynD	2.70833	3.68287	NA	LOC101891905	0.204469
XM_005192156	CG14630	-0.425103	-3.68228	A	LOC101891259	0.204469
XM_020037662	CG31223	-0.639396	-3.67995	E	LOC101896889	0.204469
XR_225570	rdgB	-0.458566	-3.67716	NA	NA	0.204469
XM_020038189	CG42255	0.398458	3.67496	D	LOC101890267	0.204469
XM_005185179	Obp56h	-0.671828	-3.67423	C	LOC101891997	0.204469
XM_005189324	CG3777	0.772252	3.67289	A	LOC101900447	0.204469
XM_005176284	FucTC	-0.303302	-3.65505	A	LOC101900945	0.211546
XM_011292932	PhKgamma	0.223458	3.64517	A	LOC101900257	0.214863
XM_020036105	CG7367	0.414752	3.63595	B	LOC101900900	0.216335
XM_005181077	CG10962	0.707153	3.63591	NA	LOC101892558	0.216335
XM_020036857	#N/A	-0.407429	-3.62623	NA	NA	0.219412
XM_005175974	TTLL12	-0.344789	-3.6236	C	LOC101894734	0.219412
XM_011291914	Syb	-1.03411	-3.61145	C	LOC101900709	0.224082
XM_005181338	Fie	0.562998	3.60516	D	LOC101892614	0.224354
XM_020035679	Rab26	-0.257971	-3.60065	D	LOC101897096	0.224354
XM_005180918	Npc2f	0.680438	3.60062	E	LOC101895135	0.224354
XM_011298292	CG15395	0.318266	3.59703	A	LOC101891042	0.224354
XR_002195269	#N/A	0.842366	3.59582	NA	NA	0.224354
XM_011292981	zfh2	0.388685	3.57718	NA	LOC105261635	0.225649
XM_005176255	CG3709	-0.174817	-3.57675	B	LOC101896150	0.225649
XR_891622	pns	-0.675127	-3.57584	NA	NA	0.225649
XM_011296354	CG8607	-0.425441	-3.57413	NA	LOC105262152	0.225649
XM_005178803	CG30371	1.19271	3.57363	C	LOC101894693	0.225649
XR_002195420	#N/A	0.799698	3.56904	NA	NA	0.225649
XM_011293159	CG4707	0.604744	3.56621	A	LOC101900718	0.225649
XR_891454	Vps4	-0.339333	-3.56197	NA	NA	0.225649
XM_011293933	CG33181	0.538655	3.56147	A	LOC101889413	0.225649
XM_011293121	vers	0.232453	3.56121	NA	LOC105261658	0.225649
XM_005181361	Sec20	-0.288508	-3.56116	E	LOC101896392	0.225649
XM_020038021	GABA-B-R2	0.42238	3.55909	E	LOC101897421	0.225649
XR_891504	Gr23a	0.521254	3.55052	NA	NA	0.228725
XM_011294024	CG14195	0.445231	3.54552	A	LOC101896524	0.229068
XM_005181363	Sra-1	0.196363	3.54445	E	LOC101896754	0.229068
XM_005190928	CG17292	0.196821	3.53635	E	LOC101901112	0.23196
XM_005190346	bor	0.361038	3.5301	NA	LOC101899605	0.233892
XM_020035296	CG43078	1.13073	3.52394	D	LOC101889345	0.235804
XM_005189823	piwi	0.286814	3.50468	NA	LOC101890058	0.245055
XM_005186625	bip1	-0.605558	-3.49487	D	LOC101899644	0.249169
XR_002194326	CG30428	-0.212351	-3.47918	NA	NA	0.255982
XM_005176776	CG17896	0.359222	3.47788	A	LOC101894473	0.255982
XM_005187412	Vps11	-0.261188	-3.47543	NA	LOC101893268	0.255982
XM_005182082	dgt6	0.40044	3.47042	E	LOC101900663	0.257069
XM_020037393	CG6654	-0.367121	-3.4671	NA	LOC109612914	0.257069
XM_005183912	#N/A	0.383569	3.46594	NA	NA	0.257069
XM_005182820	stumps	1.19845	3.45945	E	LOC101895140	0.258944
XM_005184220	Sfxn1-3	0.290913	3.45777	E	LOC101900090	0.258944
XR_002194044	CG31869	1.10159	3.44826	NA	NA	0.263175
XM_005182783	CG33181	-0.698245	-3.43712	A	LOC101889413	0.266303
XM_005186061	Ugt37C2	0.326727	3.43637	A	LOC101889822	0.266303
XM_005185596	Rcd5	0.38466	3.43424	D	LOC101892225	0.266303
XM_020036180	CG3253	-0.966802	-3.43331	C	LOC101899356	0.266303
XM_005185291	CG15674	0.383354	3.4297	C	LOC101898722	0.267033
XM_005174810	GLS	1.32853	3.41648	C	LOC101890121	0.272222
XR_002194997	CG15570	0.383671	3.41622	NA	NA	0.272222
XM_005188729	#N/A	-0.671611	-3.41416	NA	NA	0.272222
XM_020038345	bbc	-1.03522	-3.39913	C	LOC101896947	0.279695
XM_020037401	boss	-0.911496	-3.39766	E	LOC101900434	0.279695
XM_020037842	CG32533	-0.221584	-3.39488	A	LOC101894732	0.279695
XM_020037027	Cyp6a16	-0.899736	-3.39215	NA	LOC101900065	0.279695
XM_020036237	lov	0.836444	3.39067	C	LOC101888526	0.279695
XR_002194602	lola	0.415562	3.37492	NA	NA	0.287204
XM_020034665	CG31808	0.287803	3.37284	B	LOC101898466	0.287204
XM_005175416	bys	-0.372138	-3.37226	A	LOC101897838	0.287204
XM_005180934	AnxB10	0.189334	3.36596	A	LOC101897740	0.289881
XM_011292912	Tsp96F	1.2412	3.3635	NA	LOC101891276	0.290004
XM_020036019	CG1801	-1.31002	-3.35904	A	LOC101891225	0.291145
XM_005191209	santa-maria	-0.372629	-3.35525	NA	LOC101892127	0.291145
XM_020035980	Fie	-1.09715	-3.35506	D	LOC101892614	0.291145
XM_005178311	cl	-0.191437	-3.35058	E	LOC101901132	0.292095
XM_020039146	CheB74a	-0.25072	-3.34921	NA	LOC101897016	0.292095
XM_011293503	tor	0.495671	3.34627	C	LOC101888248	0.292593
XM_005176828	Osi6	-0.545224	-3.33825	E	LOC101888748	0.296542
XM_020037940	SMC3	-0.423278	-3.33339	NA	LOC109613288	0.297346
XM_005189164	CG8097	-0.263821	-3.33273	A	LOC101898684	0.297346
XM_005188728	Obp28a	-0.827271	-3.32328	A	LOC101894565	0.302124
XM_005177982	Ufd4	-0.324673	-3.32148	B	LOC101889289	0.302124
XM_005174977	CG33080	0.280138	3.31679	NA	LOC101890287	0.303903
XM_020035573	GstD1	-0.410893	-3.31189	E	LOC101897277	0.303909
XM_020034643	Ogg1	-0.510528	-3.31174	A	LOC101891690	0.303909
XM_005186704	numb	-0.661449	-3.30949	B	LOC101887688	0.303909
XM_011298174	CG2909	0.272499	3.30832	A	LOC101898587	0.303909
XM_020036569	flr	-0.398851	-3.30318	NA	LOC109612479	0.306047
XM_005177053	CG8547	0.481706	3.29847	C	LOC101895351	0.307905
XM_011295182	LRP1	-0.323446	-3.29465	NA	LOC105261970	0.309144
XM_020039516	ppk16	-0.657233	-3.28861	NA	LOC105262440	0.311494
XM_020035864	RpL30	-0.513322	-3.28723	A	LOC101899351	0.311494
XM_005186829	CG8051	-0.768066	-3.28409	A	LOC101893216	0.312285
XM_005178855	CG34293	0.283849	3.27548	E	LOC101889293	0.317023
XM_005186003	CG17841	-0.40501	-3.26983	NA	LOC101894046	0.319408
XM_020039448	Smyd3	0.52289	3.26817	A	LOC101892988	0.319408
XM_005186113	CG8679	0.247227	3.24658	A	LOC101898727	0.334061
XM_011292128	CG30411	0.4539	3.2382	C	LOC101899282	0.338976
XM_005184604	C3G	-0.352274	-3.23457	A	LOC101895145	0.339479
XM_020036127	#N/A	0.424479	3.23357	NA	NA	0.339479
XM_011293662	CG44422	-0.26515	-3.23025	NA	LOC101890086	0.340373
XM_020038278	CG13855	-0.280958	-3.2282	E	LOC101892690	0.340373
XM_005178960	CG1358	0.451065	3.22653	C	LOC101893006	0.340373
XM_005190024	CG32170	-0.352603	-3.22441	D	LOC101895573	0.340502
XM_005187367	Galphas	0.343553	3.21614	C	LOC101899076	0.344058
XM_005174856	eEFSec	-0.410441	-3.21407	C	LOC101897381	0.344058
XM_005191657	eIF4B	0.150797	3.21346	D	LOC101901053	0.344058
XM_020035302	prage	-0.381595	-3.21147	NA	LOC109611893	0.344058
XM_005189983	CG16713	-0.623486	-3.2098	NA	LOC101889500	0.344058
XM_020037863	sw	1.30775	3.2013	A	LOC101888373	0.344058
XM_020039480	CG2321	0.294035	3.20129	NA	LOC105262429	0.344058
XM_005188971	laza	-0.299363	-3.20128	NA	LOC101893716	0.344058
XR_002194828	CG7333	0.455428	3.20123	NA	NA	0.344058
XM_005174934	CG33774	0.39211	3.19928	C	LOC101897545	0.344058
XM_011295877	CG7044	-0.829183	-3.19608	D	LOC101889084	0.344058
XM_005181733	Zn72D	-0.94174	-3.19405	D	LOC101887626	0.344058
XM_005185839	cdi	-0.360263	-3.19248	E	LOC101893764	0.344058
XM_005180218	nopo	-0.245209	-3.19225	C	LOC101896985	0.344058
XR_225654	#N/A	-0.328099	-3.1916	NA	NA	0.344058
XM_011297257	zfh2	0.367488	3.18744	NA	LOC101893110	0.345898
XM_005175570	#N/A	0.469513	3.18167	NA	NA	0.347427
XM_020039777	nuf	0.377709	3.1799	NA	LOC101892531	0.347427
XM_005178862	ppk31	-0.325716	-3.17849	E	LOC101890475	0.347427
XM_011294967	CG15073	-0.559057	-3.17828	A	LOC101895491	0.347427
XM_005187557	CG7044	-0.730803	-3.17337	D	LOC101889084	0.349864
XM_005186391	bves	-0.285649	-3.17137	A	LOC101887348	0.349864
XM_005183104	Mlc1	0.598721	3.16518	E	LOC101897510	0.349864
XM_005185112	GstE7	-0.97352	-3.16498	E	LOC101895555	0.349864
XM_020039431	Dyrk3	-0.228141	-3.16382	NA	LOC109614135	0.349864
XM_011297879	mof	0.18261	3.16267	A	LOC101890400	0.349864
XR_891815	CG7523	0.750615	3.1624	NA	NA	0.349864
XM_005183130	gny	-0.186044	-3.15759	A	LOC101901798	0.349864
XM_005184567	Eglp2	0.747518	3.15436	D	LOC101888428	0.349864
XM_005191198	CG17633	-0.316254	-3.15293	B	LOC101890219	0.349864
XM_005185539	Pkc98E	0.530066	3.15288	E	LOC101897861	0.349864
XM_011295741	CG6084	-0.738023	-3.15195	D	LOC101894281	0.349864
XM_005182037	CG14512	-0.216228	-3.15101	E	LOC101894030	0.349864
XM_005186668	CG9657	0.326682	3.15082	A	LOC101895849	0.349864
XM_011297018	Pde1c	-0.470757	-3.14587	B	LOC101897534	0.351449
XM_020035461	Traf-like	-0.201802	-3.14545	A	LOC101891629	0.351449
XM_005183715	CG5504	0.32363	3.13978	C	LOC101887340	0.353509
XM_020035331	cib	1.78624	3.13952	NA	THY	0.353509
XM_011292070	Usp7	0.328586	3.13549	A	LOC101896805	0.354319
XM_005181083	NetB	-0.317104	-3.13518	A	LOC101894913	0.354319
XM_005188685	eIF2Bbeta	0.173638	3.13043	A	LOC101887245	0.356821
XM_005180122	jigr1	0.553913	3.12838	D	LOC101896003	0.357143
XM_020037542	CG7368	-0.390466	-3.1168	D	LOC101894760	0.362636
XM_005188507	CG14615	0.740471	3.11645	C	LOC101900569	0.362636
XM_011296241	pan	-0.867097	-3.11594	NA	LOC101891022	0.362636
XM_020036965	cni	0.389858	3.11511	B	LOC101896350	0.362636
XM_005182150	Mef2	-0.524192	-3.10954	C	LOC101898601	0.364482
XM_020035429	CG31457	-0.183739	-3.10944	NA	LOC109611945	0.364482
XM_020038631	CG33054	-0.36022	-3.10802	B	LOC101890164	0.364482
XM_020038078	CG6084	0.318457	3.10584	D	LOC101894281	0.364811
XM_020038550	Setd3	0.844604	3.10405	A	LOC101899078	0.364811
XM_011294926	#N/A	-0.36168	-3.10282	NA	NA	0.364811
XM_020037402	boss	0.992829	3.1	E	LOC101900434	0.364811
XM_005178236	spartin	0.327682	3.09955	E	LOC101889112	0.364811
XM_005183391	Taf13	0.212089	3.09671	B	LOC101891349	0.364811
XM_005175548	Parp	-0.234724	-3.0965	E	LOC101896797	0.364811
XR_891708	CG14352	0.491685	3.09493	NA	NA	0.364817
XM_005185860	rdgA	-0.416431	-3.09146	A	LOC101897641	0.3664
XM_005180114	dpr21	-0.283975	-3.08885	D	LOC101894643	0.366431
XM_020036257	Ctl2	1.25337	3.08768	E	LOC101895250	0.366431
XM_005188850	fs(1)K10	1.62374	3.08565	A	LOC101887594	0.366431
XM_020038031	ec	-0.316059	-3.08284	NA	LOC105262051	0.366431
XM_005177491	Spt7	-0.299534	-3.08234	A	LOC101891859	0.366431
XM_005186564	obst-A	0.386893	3.08216	A	LOC101889135	0.366431
XM_011297068	CG8611	-0.22914	-3.06526	NA	LOC101891375	0.379408
XM_020039528	CG14947	0.42876	3.05816	NA	LOC105262366	0.382506
XM_011292830	dpr18	0.281355	3.05667	NA	LOC101896333	0.382506
XM_020039142	CG4004	-0.404237	-3.05642	NA	LOC101894060	0.382506
XM_005186295	nrv2	0.289117	3.05515	NA	LOC101900393	0.382506
XM_005182184	Rcd2	-0.355304	-3.05281	D	LOC101891401	0.382506
XM_011291931	achi	0.265774	3.05154	C	LOC101890526	0.382506
XM_020036199	Mocs2B	0.51867	3.05111	C	LOC101893976	0.382506
XM_020036441	Ras85D	0.680892	3.04595	E	LOC101895899	0.385647
XM_005176012	CG17349	0.350906	3.04345	E	LOC101900998	0.385647
XR_002195287	CapaR	-0.35583	-3.04225	NA	NA	0.385647
XM_011297782	CG10362	0.523078	3.04157	NA	LOC101889728	0.385647
XM_020036531	CG2991	0.384789	3.03966	NA	LOC109612464	0.386033
XM_011294671	Rip11	0.304849	3.03728	A	LOC101894817	0.386834
XM_011295043	CG18262	-0.242932	-3.03576	NA	LOC105261941	0.386889
XM_005186971	hng3	0.228871	3.03087	NA	LOC101889195	0.388951
XR_002194182	#N/A	0.376555	3.0305	NA	NA	0.388951
XM_020038757	Ugt49C1	-0.864349	-3.02812	C	LOC101890271	0.389766
XM_005179919	CG5245	-0.685716	-3.01968	A	LOC101890757	0.395966
XM_011292648	Phs	-0.188501	-3.01463	NA	LOC101890477	0.397068
XR_002195536	#N/A	0.577798	3.01447	NA	NA	0.397068
XM_011294765	Mur89F	0.538368	3.01326	E	LOC101899868	0.397068
XM_011294583	SmydA-3	0.301216	3.01272	B	LOC101899979	0.397068
XM_005178167	wge	-0.315047	-3.00848	E	LOC101891914	0.399606
XM_005178972	Uba4	-0.159553	-3.00633	C	LOC101895020	0.400033
XR_002194124	CG6800	-0.36699	-3.00456	NA	NA	0.400033
XM_005179948	CG42336	-0.731996	-3.00377	C	LOC101895888	0.400033
XM_005179449	CG8399	0.346305	3.00017	C	LOC101899404	0.401179
XM_005177922	CG11353	0.249717	2.99969	C	LOC101893466	0.401179
XM_005183647	CG14683	0.167571	2.99456	E	LOC101891183	0.404565
XM_005188579	l(2)k09913	0.706218	2.99027	C	LOC101898099	0.405921
XM_005175259	CG13204	-0.308583	-2.98993	NA	LOC101898920	0.405921
XR_225670	#N/A	-0.455065	-2.98756	NA	NA	0.405921
XM_020037669	E2f1	0.795232	2.98748	E	LOC101899368	0.405921
XM_005181532	CG10470	-0.192184	-2.98616	B	LOC101897570	0.405921
XM_011296534	CG12344	-0.544813	-2.98328	NA	LOC105262182	0.40713
XM_005182339	#N/A	-0.79607	-2.98133	NA	NA	0.40713
XM_005187388	CG13868	0.290394	2.98044	C	LOC101888662	0.40713
XM_020036258	CG14516	-0.420444	-2.97911	E	LOC101893641	0.40713
XM_005190482	SmydA-8	1.30143	2.97758	NA	LOC101894623	0.40713
XM_005185431	CG12012	0.229629	2.97536	D	LOC101893761	0.40713
XM_011296593	Cngl	-0.336857	-2.97425	E	LOC101900573	0.40713
XR_002195569	tef	0.774545	2.97399	NA	NA	0.40713
XM_005184778	Atg17	-0.453746	-2.97084	E	LOC101895146	0.408788
XM_020038291	Ten-a	-0.381348	-2.96672	NA	LOC109613458	0.410533
XR_002194507	l(2)gl	-0.323759	-2.96628	NA	NA	0.410533
XM_020036113	CG43775	-0.270958	-2.96369	B	LOC101900372	0.410869
XM_005184639	CG32982	-0.378009	-2.96326	NA	LOC101901024	0.410869
XM_011292191	pum	-0.690766	-2.96079	E	LOC101893967	0.411932
XR_225703	#N/A	-0.475473	-2.95731	NA	NA	0.413234
XM_005183182	axed	0.575919	2.95668	D	LOC101897225	0.413234
XM_005184500	Oscillin	0.346915	2.95544	B	LOC101889540	0.413234
XR_891814	Vps13D	-0.395043	-2.95352	NA	NA	0.413802
XM_005185470	CG15236	-1.06437	-2.94964	C	LOC101900562	0.415057
XM_020036992	CG1578	0.321902	2.94957	A	LOC101887741	0.415057
XM_005191841	pon	0.332559	2.93879	NA	LOC101890860	0.423976
XM_005181462	reb	0.186447	2.93701	C	LOC101899682	0.424444
XM_005183749	CG34155	-0.349043	-2.934	E	LOC101893987	0.424772
XM_005183923	CG9911	-0.440048	-2.93352	A	LOC101896174	0.424772
XM_005186601	tor	0.391248	2.93135	C	LOC101895612	0.424772
XR_002195242	CG14253	0.614629	2.93006	NA	NA	0.424772
XM_005181535	mRpS23	0.167396	2.92965	B	LOC101898077	0.424772
XM_011295777	Vamp7	1.1274	2.92898	C	LOC101891712	0.424772
XM_005187595	CG6654	0.243054	2.9254	A	LOC101895436	0.426444
XM_005182453	CG11367	-0.26194	-2.92469	D	LOC101893360	0.426444
XM_020039087	zfh2	0.358539	2.9192	NA	LOC101891673	0.429521
XR_002195457	CG43088	-0.32285	-2.91706	NA	NA	0.429521
XM_011292900	Nxt1	-0.23191	-2.91686	C	LOC101898480	0.429521
XR_002195208	ICA69	-0.189517	-2.91645	NA	NA	0.429521
XM_005175225	ssp7	0.894952	2.91426	NA	LOC101892939	0.429529
XM_005190721	Eip63E	-0.528867	-2.91395	NA	LOC101891844	0.429529
XM_020038066	Dci	-0.239976	-2.91214	A	LOC101898507	0.430083
XM_011296023	CG2233	-0.816999	-2.90885	NA	LOC105262102	0.431286
XM_005181483	Uros1	-0.25086	-2.90742	A	LOC101889179	0.431286
XM_005183846	Vps26	-0.247561	-2.90674	A	LOC101896761	0.431286
XM_020037329	RpS8	-0.349744	-2.90448	NA	LOC109612869	0.431286
XM_005179166	wupA	0.540504	2.90388	A	LOC101895885	0.431286
XM_005190921	CG42807	0.687652	2.903	E	LOC101899942	0.431286
XM_020036054	side-V	-0.382417	-2.90205	NA	LOC101888476	0.431286
XM_005180870	CG12179	-0.225146	-2.90107	A	LOC101901462	0.431286
XM_011298035	Dp	0.555534	2.89875	C	LOC101890130	0.432359
XR_002195475	CG32694	0.293265	2.89639	NA	NA	0.433352
XM_020037773	CG33995	0.98625	2.89498	B	LOC101898503	0.433352
XM_011292652	OtopLa	-0.704851	-2.89362	NA	LOC101891519	0.433352
XM_005186158	jigr1	-0.2315	-2.89042	E	LOC101891940	0.433352
XM_020035534	svr	-0.305139	-2.88861	A	LOC101900836	0.433352
XM_005189899	SmydA-8	-0.164792	-2.88772	NA	LOC101889090	0.433352
XM_005182658	mst	-0.270857	-2.88769	A	LOC101898194	0.433352
XM_020034890	CYLD	0.3452	2.88647	B	LOC101889912	0.433352
XM_005187657	PheRS-m	0.440668	2.88576	C	LOC101891247	0.433352
XM_005188577	PheRS-m	0.440668	2.88576	C	LOC101897769	0.433352
XM_020035187	Rab6	-0.328252	-2.88333	NA	LOC109611845	0.433886
XM_005177403	Src42A	-1.07952	-2.88286	NA	LOC101891623	0.433886
XM_020037770	CG9125	-0.30656	-2.88113	E	LOC101895493	0.434422
XM_005179843	nudE	0.403772	2.87802	D	LOC101893131	0.436303
XM_005183748	#N/A	0.182091	2.87556	NA	NA	0.437148
XM_005185955	CG8281	-0.176227	-2.87482	D	LOC101900796	0.437148
XM_020039789	#N/A	-0.495601	-2.8715	NA	NA	0.438911
XM_005182566	5-HT2B	0.264246	2.87041	E	LOC101897852	0.438911
XM_005177255	Cyp4ae1	0.244997	2.86658	A	LOC101898177	0.438911
XM_005180936	AnxB10	0.291085	2.86483	A	LOC101898074	0.438911
XM_005177561	CG14795	-0.329881	-2.86477	A	LOC101889165	0.438911
XM_005179091	Mondo	-0.889355	-2.86469	B	LOC101899114	0.438911
XM_020036899	Cyp1	-0.309798	-2.86384	A	LOC101900429	0.438911
XM_020036223	Acsl	1.15883	2.8632	C	LOC101888355	0.438911
XM_005179836	Ance-4	0.401247	2.86266	C	LOC101891395	0.438911
XM_005183976	Arp8	0.229406	2.86077	A	LOC101890040	0.439645
XM_011296028	AOX3	-0.646646	-2.85471	NA	LOC101901154	0.444487
XM_005187187	FeCH	0.17486	2.85308	E	LOC101896775	0.444985
XM_005187944	Ggamma30A	-0.249179	-2.84724	NA	LOC101896246	0.447532
XM_020037328	Ugt35B1	-0.369392	-2.84566	NA	LOC109612868	0.447532
XM_020040154	#N/A	-0.655423	-2.84452	NA	NA	0.447532
XM_020038710	Rhau	1.08519	2.84161	B	LOC101898799	0.447532
XM_020038902	Kr-h2	1.19328	2.84159	B	LOC101895049	0.447532
XM_005184050	Bap60	0.939444	2.84062	A	LOC101887507	0.447532
XM_011295908	CaBP1	-0.59068	-2.84026	B	LOC101897767	0.447532
XM_020035451	peb	0.878334	2.83887	A	LOC101897888	0.447532
XM_020038335	GLS	-0.994469	-2.83877	C	LOC101890121	0.447532
XM_020037786	CG32512	-0.680221	-2.83867	A	LOC101901809	0.447532
XM_011296004	CG9723	-0.196978	-2.83823	A	LOC101892121	0.447532
XM_005184449	Cpr49Ae	-0.286441	-2.83165	C	LOC101894041	0.45246
XM_011296134	pros	-0.926193	-2.8311	NA	LOC101894284	0.45246
XM_005179270	RPA2	-0.178143	-2.82683	E	LOC101900475	0.455655
XM_005190904	St1	-0.575804	-2.82115	C	LOC101896487	0.460044
XM_005189225	Tfb4	-0.220162	-2.81934	B	LOC101898102	0.460044
XM_005187166	CG10725	-0.212416	-2.81923	D	LOC101893092	0.460044
XM_020039274	#N/A	-0.182189	-2.81727	NA	NA	0.460933
XM_011293213	rdgA	-0.368094	-2.81279	NA	LOC105261451	0.463463
XM_020039326	CG3106	-0.183491	-2.81264	NA	LOC109614065	0.463463
XM_011297543	CG13594	-1.47255	-2.8079	C	LOC101898226	0.466347
XR_002194446	#N/A	-0.1401	-2.80768	NA	NA	0.466347
XM_005186408	f-cup	0.313106	2.80632	E	LOC101890605	0.46664
XR_225529	aqz	-0.487112	-2.80161	NA	NA	0.470412
XM_005186333	CG11035	-0.362155	-2.80048	A	LOC101892285	0.470473
XM_020039399	#N/A	-0.304802	-2.79618	NA	NA	0.473846
XM_020038692	ORMDL	0.473781	2.79153	D	LOC101890786	0.474985
XM_020038151	CG17350	-0.930328	-2.79056	B	LOC101897765	0.474985
XM_005190463	CG43673	-1.41323	-2.78902	NA	LOC101890794	0.474985
XM_005189506	St3	0.206801	2.78644	NA	LOC101888846	0.474985
XM_005180465	Sfxn2	0.330416	2.78636	D	LOC101893635	0.474985
XM_005178150	cry	0.262207	2.78389	E	LOC101889464	0.474985
XM_005177347	Phf7	-0.275226	-2.78139	A	LOC101897555	0.474985
XM_005177418	prim	0.203395	2.78111	C	LOC101894475	0.474985
XM_011295421	CG31469	-1.00315	-2.78088	E	LOC101890264	0.474985
XM_005188587	SmydA-6	-0.171943	-2.7804	C	LOC101899433	0.474985
XM_005189955	Ugt35B1	-0.414585	-2.77937	NA	LOC101899202	0.474985
XM_020039216	jvl	-0.24319	-2.77916	NA	LOC109614015	0.474985
XM_020035313	nompA	-0.557698	-2.77712	C	LOC101894580	0.474985
XM_005175702	Rbcn-3A	-0.99843	-2.777	NA	LOC101888283	0.474985
XM_020036342	#N/A	0.222864	2.7761	NA	NA	0.474985
XM_020038303	waw	-0.212967	-2.77444	A	LOC101892289	0.474985
XM_005190554	CG12817	0.259822	2.77386	NA	LOC101892587	0.474985
XM_005175325	CG15309	-0.437971	-2.7738	NA	LOC101896203	0.474985
XM_020036181	CG3253	0.502121	2.7737	C	LOC101899356	0.474985
NM_001287542	nAChRbeta3	0.255029	2.77325	NA	nAChRbeta3	0.474985
XM_011293442	CG33111	0.25121	2.77243	E	LOC101891226	0.474985
XM_005188683	Vajk4	0.293697	2.77218	NA	LOC109611601	0.474985
XM_005179732	CG10189	-0.164867	-2.76735	B	LOC101901740	0.47769
XM_005188408	CG10353	0.268702	2.7664	NA	LOC101898447	0.47769
XM_020036492	Fas3	-0.287114	-2.76453	B	LOC101896521	0.47769
XM_005181224	HDAC4	-1.02082	-2.7635	A	LOC101889299	0.47769
XM_005183221	IntS4	-0.3055	-2.76131	A	LOC101889066	0.47769
XM_011296349	Obp56a	0.482773	2.76121	NA	LOC101891888	0.47769
XM_020040084	tej	-0.407253	-2.76081	C	LOC101900531	0.47769
XM_020038408	CG9384	-1.13744	-2.76078	D	LOC101891834	0.47769
XM_005191600	mRpL32	-0.17579	-2.76054	E	LOC101889447	0.47769
XM_005183455	kek4	-0.292316	-2.75792	B	LOC101887903	0.478469
XM_005177236	CG3566	-0.217035	-2.75781	A	LOC101895524	0.478469
XM_005187122	Obp57c	-0.833071	-2.75502	NA	LOC101900507	0.480366
XM_005188243	Gclc	-0.199555	-2.75308	A	LOC101901539	0.481376
XR_002194831	#N/A	0.236735	2.74987	NA	NA	0.483418
XM_005178925	eIF2Bepsilon	-0.155423	-2.74797	A	LOC101887331	0.483418
XM_011293339	CG32603	-0.260867	-2.74783	NA	LOC105261696	0.483418
XM_005175438	Fas1	0.366793	2.74721	E	LOC101887876	0.483418
XM_020038605	Gfrl	-0.270728	-2.74181	NA	LOC109613590	0.487517
XM_020038504	Eip74EF	-0.340204	-2.74109	D	LOC101894176	0.487517
XM_005175919	CG4733	0.285515	2.74005	E	LOC101900179	0.487517
XM_011292040	CG16965	-0.491275	-2.73946	B	LOC101889101	0.487517
XM_005175357	Snap24	-0.406207	-2.73598	E	LOC101887481	0.489011
XM_020037843	Adar	-0.291244	-2.73588	NA	LOC101899702	0.489011
XM_005186004	sno	-0.75394	-2.73359	NA	LOC101894390	0.489011
XM_011293219	#N/A	0.196179	2.73246	NA	NA	0.489011
XM_020039322	cno	0.41118	2.73168	E	LOC101892464	0.489011
XM_005192051	Alp9	-0.718342	-2.73124	NA	LOC101900763	0.489011
XM_005184161	Oatp30B	-0.690294	-2.73091	B	LOC101891010	0.489011
XM_005183409	CG10562	-0.369609	-2.73023	E	LOC101894595	0.489011
XM_011295886	Nopp140	0.237868	2.72889	NA	LOC105262084	0.489011
XM_005189858	Syngr	0.471863	2.72505	NA	LOC101896602	0.489011
XM_011293284	Nepl5	-0.371402	-2.72306	NA	LOC105261679	0.489011
XM_005192162	CG13492	0.698988	2.72257	C	LOC101892423	0.489011
XM_020035595	side-VIII	-0.522802	-2.72252	C	LOC101891049	0.489011
XM_005184862	CG13144	-0.148501	-2.72242	B	LOC101895670	0.489011
XM_011296345	CG33054	0.277893	2.71993	B	LOC101890164	0.489011
XM_005180620	Bet1	-0.145159	-2.71919	D	LOC101889405	0.489011
XM_020037985	CG13894	-0.576885	-2.71916	A	LOC101896411	0.489011
XM_005185511	bip2	0.520875	2.71746	A	LOC101893150	0.489011
XM_005178838	ens	0.412144	2.7165	D	LOC101899735	0.489011
XM_005183592	ND-23	0.149306	2.71635	E	LOC101896706	0.489011
XM_011294061	CG2082	0.553888	2.71571	E	LOC101892561	0.489011
XM_020039877	CG33785	-0.355193	-2.71488	C	LOC101896619	0.489011
XM_020038061	Dcr-2	-0.333329	-2.71472	C	LOC101893656	0.489011
XM_011297390	#N/A	-0.469935	-2.71454	NA	NA	0.489011
XM_005191733	cic	-0.30568	-2.7143	NA	LOC101900062	0.489011
XR_002194158	#N/A	-0.227094	-2.71018	NA	NA	0.491578
XM_005180704	CG2444	-0.221704	-2.707	NA	LOC101889526	0.491578
XM_020035853	Ilp5	-0.3157	-2.70671	NA	LOC109612104	0.491578
XM_020036024	Dsp1	0.51655	2.70605	A	LOC101891750	0.491578
XM_020039495	#N/A	0.292986	2.70583	NA	NA	0.491578
XM_011294592	hec	-0.304279	-2.70563	F	LOC101892501	0.491578
XM_020039434	Toll-9	-0.290433	-2.704	NA	LOC105262409	0.491578
XM_011295943	CG2233	-1.00235	-2.70315	NA	LOC105262094	0.491578
XM_005179325	CG15744	0.202442	2.70263	A	LOC101894481	0.491578
XM_005176129	spirit	0.277655	2.70222	A	LOC101890632	0.491578
XM_005189785	Acp65Aa	0.59695	2.70182	NA	LOC101897706	0.491578
XM_011293813	nompC	-0.418909	-2.70049	B	LOC101893528	0.491909
XM_020037129	Flo1	0.70398	2.69944	C	LOC101901446	0.491909
XR_002194959	#N/A	0.250214	2.69778	NA	NA	0.491909
XM_005189069	SPARC	0.309519	2.69758	E	LOC101895798	0.491909
XM_005190296	CG11099	0.346646	2.69699	NA	LOC101890968	0.491909
XR_891427	#N/A	-0.222888	-2.6937	NA	NA	0.494013
XM_005177820	Nprl2	-0.27723	-2.6932	A	LOC101891792	0.494013
XM_020038181	CG7115	1.01231	2.69235	B	LOC101901430	0.494013
XM_005176030	AdipoR	0.357851	2.68866	E	LOC101889454	0.496657
XR_002195164	CG43778	0.20619	2.68739	NA	NA	0.496657
XM_005191507	MED18	-0.150443	-2.68723	A	LOC101899389	0.496657
XM_005178887	insv	0.638591	2.68558	B	LOC101894694	0.496978
XM_011295822	CG3225	0.175398	2.68515	C	LOC101900101	0.496978
XM_011293382	Tsp29Fa	-0.306011	-2.67979	B	LOC101895543	0.501549
XM_011294346	Him	-0.260141	-2.67845	NA	LOC105261825	0.501549
XM_005174798	Prx2540-1	-0.318555	-2.67831	C	LOC101888226	0.501549
XM_005188073	Tim9b	0.439134	2.67689	E	LOC101887756	0.502137
XM_005179745	CG11839	-0.19809	-2.67456	B	LOC101889348	0.503383
XM_020036231	Acsl	1.05004	2.67399	C	LOC101888355	0.503383
XM_005183926	cold	0.216455	2.67119	A	LOC101896577	0.504894
XM_005178430	Pcl	-0.168307	-2.67009	C	LOC101891793	0.504894
XM_020034953	CG4587	-0.440067	-2.6694	B	LOC101893182	0.504894
XM_020038173	Pkn	-0.252503	-2.66912	C	LOC101900440	0.504894
XM_020037451	CG17486	-0.560364	-2.66741	A	LOC101896887	0.505286
XM_020036897	Cyp1	-0.206047	-2.66702	A	LOC101898665	0.505286
XM_011295441	GLaz	0.395039	2.66409	C	LOC101889450	0.507565
XM_020036957	Oseg6	-0.210987	-2.66209	C	LOC101891530	0.508006
XM_005190582	beat-IV	-0.282784	-2.66196	E	LOC101897136	0.508006
XM_011296294	Spc105R	0.803315	2.66029	NA	LOC105262147	0.508904
XR_002194424	sut2	-0.247226	-2.65839	NA	NA	0.510051
XM_005177221	e(y)3	0.197414	2.65681	A	LOC101893239	0.510173
XM_020034662	RapGAP1	0.922863	2.65656	B	LOC101896864	0.510173
XM_020034762	CG34179	-0.161289	-2.65536	B	LOC101898417	0.510561
XM_005181076	PCID2	-0.248044	-2.65438	D	LOC101892387	0.510685
XM_005175187	CG2841	-0.385351	-2.65353	A	LOC101899897	0.510685
NM_001286887	Sod2	0.166497	2.64928	NA	SOD2	0.512798
XM_020035963	Zip99C	0.517666	2.64918	E	LOC101901577	0.512798
XM_020039737	stnA	-0.800587	-2.64908	A	LOC101900463	0.512798
XM_020035904	#N/A	-0.210981	-2.64806	NA	NA	0.512803
XM_020035489	ana	0.261095	2.64683	C	LOC101891573	0.512803
XM_020036885	CG15365	0.850332	2.64612	A	LOC101894707	0.512803
XM_020038503	CngA	-0.236025	-2.64386	C	LOC101901711	0.512803
XM_020038139	zfh2	-0.668107	-2.64347	D	LOC101895120	0.512803
XR_002195110	KrT95D	0.629997	2.64305	NA	NA	0.512803
XR_891692	#N/A	-0.386623	-2.64238	NA	NA	0.512803
XM_005177776	slmo	0.240964	2.64181	B	LOC101898764	0.512803
XM_005176718	Herc4	-0.298318	-2.64149	D	LOC101899782	0.512803
XM_005185137	Rad17	0.34387	2.63943	NA	LOC101899696	0.514017
XM_020039086	zfh2	0.268381	2.6377	NA	LOC105262277	0.514017
XM_005187465	c(3)G	-0.435237	-2.63714	B	LOC101887587	0.514017
XM_020036346	Hex-A	-0.40103	-2.63669	NA	LOC105261744	0.514017
XM_005175642	Coq5	0.171279	2.63624	A	LOC101901340	0.514017
XM_020035724	CG11975	0.324193	2.63511	E	LOC101901521	0.514357
XM_020038187	CG42255	-0.24781	-2.63177	D	LOC101890105	0.517167
XM_005184605	GstE11	0.566111	2.62771	C	LOC101895316	0.519925
XM_005175258	CG7492	-0.888986	-2.6273	NA	LOC101898751	0.519925
XM_005191240	CG6465	0.293904	2.62684	E	LOC101897431	0.519925
XM_011298143	fs(1)h	1.10997	2.62583	A	LOC101896324	0.520141
XM_005184565	Ugt302C1	0.261309	2.62359	D	LOC101888076	0.521742
XM_005187486	Ddr	-0.255158	-2.62144	B	LOC101891072	0.523252
XM_011296284	CG31741	0.204039	2.62003	B	LOC101893097	0.523485
XM_005185556	CG11334	-0.447554	-2.6196	E	LOC101900563	0.523485
XM_011293310	CG13659	-0.16518	-2.6171	E	LOC101894752	0.5254
XM_020036461	l(1)G0196	-0.546189	-2.61512	A	LOC101898430	0.525815
XR_002195453	#N/A	-0.303026	-2.61493	NA	NA	0.525815
XM_011297989	CG10209	0.642069	2.61369	NA	LOC101900644	0.525815
XM_005188273	CG17658	-0.215357	-2.61289	B	LOC101892122	0.525815
XM_011294869	toy	0.317899	2.61238	NA	LOC101891264	0.525815
XM_005186002	Alp12	-0.253323	-2.61187	NA	LOC101893596	0.525815
XR_002195173	Aldh	0.811615	2.61076	NA	NA	0.52616
XM_020037073	EcR	-0.48935	-2.60962	C	LOC101897111	0.526539
XM_005185493	CG33303	0.298128	2.6063	A	LOC101889760	0.529421
XM_020039113	unc-13-4A	-0.157036	-2.60492	NA	LOC105262283	0.530079
XM_005187545	#N/A	-0.573646	-2.60047	NA	NA	0.532631
XM_005181031	Tm1	0.842557	2.60046	E	LOC101898358	0.532631
XM_011296709	toc	-0.849485	-2.59944	NA	LOC101893382	0.532631
XM_020035531	CG42336	0.313181	2.59902	C	LOC101895888	0.532631
XM_011294980	fid	-0.383836	-2.59871	E	LOC101900610	0.532631
NM_001286883	nAChRalpha2	-0.372045	-2.59741	NA	Mda2	0.533206
XM_005185938	Pa1	-0.149489	-2.59509	A	LOC101897691	0.534201
XM_005181963	CG2004	-0.395198	-2.59496	A	LOC101896697	0.534201
XM_005189931	LManII	0.260135	2.59329	B	LOC101894887	0.535218
XR_002194426	#N/A	-0.366805	-2.59137	NA	NA	0.536528
XM_005185903	Ntl	0.30011	2.5901	B	LOC101891767	0.536814
XM_020037792	CG31469	0.983203	2.58784	E	LOC101890264	0.536814
XM_005180731	spri	0.191614	2.58669	A	LOC101893749	0.536814
XM_005188669	CG33964	-0.189637	-2.58648	C	LOC101898899	0.536814
XM_005188567	SmydA-5	-0.404865	-2.58634	C	LOC101896186	0.536814
XM_020037229	Samuel	-0.279446	-2.58598	B	LOC101894759	0.536814
XM_005176959	Acbp2	-0.351263	-2.58563	D	LOC101895698	0.536814
XM_005188578	hpo	1.2819	2.58199	C	LOC101897931	0.539855
XM_005189075	CG4707	0.82699	2.58145	C	LOC101896840	0.539855
XM_020036318	EbpIII	0.406527	2.57752	C	LOC101898192	0.543536
XM_005178496	crol	-0.160787	-2.57572	E	LOC101888290	0.544733
XM_005175625	#N/A	-0.349395	-2.57251	NA	NA	0.545142
XM_005175006	#N/A	-0.355446	-2.5722	NA	NA	0.545142
XM_020037046	Mlh1	-0.230364	-2.57057	C	LOC101888311	0.545142
XM_011297824	luna	-0.297289	-2.57045	C	LOC101887205	0.545142
XM_005182417	Sf3a2	-0.165315	-2.57036	D	LOC101887285	0.545142
XM_020038557	CG17333	-0.278973	-2.57029	D	LOC101887592	0.545142
XM_011294819	Nha2	0.77282	2.56941	E	LOC101896766	0.545142
XM_020039129	#N/A	-0.310102	-2.5692	NA	NA	0.545142
XM_020038830	Cngl	-0.275508	-2.56823	E	LOC101900750	0.545381
XM_020034797	#N/A	0.541841	2.56722	NA	NA	0.545667
XM_005186378	CG3625	0.38448	2.56629	B	LOC101899875	0.545871
XM_005186810	Ufd1-like	0.201937	2.5653	D	LOC101889825	0.546127
XM_005178222	bdl	1.21787	2.56312	NA	LOC101900777	0.546928
XM_005181989	uzip	0.198999	2.56243	C	LOC101901137	0.546928
XM_005187662	CG12929	0.245517	2.56234	C	LOC101892120	0.546928
XM_005176667	Wdr92	-0.178068	-2.55974	D	LOC101891856	0.549104
XM_011295330	tkv	-0.292076	-2.55845	B	LOC101900564	0.549192
XM_005175488	dsh	0.400018	2.55787	NA	LOC101897435	0.549192
XM_005187590	Tango5	-0.44461	-2.5574	A	LOC101894608	0.549192
XM_020035983	CG46303	-0.312329	-2.55401	NA	LOC109612176	0.551506
XM_005185837	ATPsynD	1.03152	2.55393	E	LOC101893316	0.551506
XR_002195405	#N/A	-0.205263	-2.5521	NA	NA	0.552797
XM_005189725	CG5418	-0.32096	-2.5513	NA	LOC101887700	0.552853
XM_020039672	#N/A	-0.266813	-2.54886	NA	NA	0.55446
XM_005189054	CG17999	-0.574882	-2.54791	NA	LOC101893275	0.55446
XM_005176097	CG4872	0.323599	2.54632	A	LOC101899954	0.55446
XM_005179565	AIMP1	0.166965	2.54557	C	LOC101888636	0.55446
XR_225571	rdgB	-0.3663	-2.54535	NA	NA	0.55446
XM_005192132	CG15814	0.184425	2.54299	A	LOC101901610	0.55446
XM_020038534	CG2233	-0.746625	-2.54251	B	LOC101894897	0.55446
XM_020037176	CG33644	-0.193384	-2.54233	NA	LOC109612798	0.55446
XM_011292068	Dip-C	-0.486464	-2.54165	A	LOC101894966	0.55446
XM_020040058	CG12177	0.73907	2.54115	A	LOC101899841	0.55446
XM_020040125	Frl	0.257516	2.54057	D	LOC101900825	0.55446
XM_005184930	Fas3	0.590595	2.53937	NA	LOC101894388	0.55446
XM_005184483	FucTB	1.36414	2.53916	B	LOC101901473	0.55446
XR_002195527	CG7523	0.421769	2.53865	NA	NA	0.55446
XM_005184155	Yp1	0.159061	2.53788	A	LOC101889984	0.55446
XM_005177644	RecQ4	-0.279184	-2.53723	D	LOC101888987	0.55446
XM_005175983	Drat	0.836802	2.53704	C	LOC101896043	0.55446
XR_002194394	CG30428	-0.115651	-2.53638	NA	NA	0.55446
XM_005188997	CG13901	-0.186101	-2.53589	D	LOC101898683	0.55446
XR_891522	clos	0.484522	2.53361	NA	NA	0.555852
XM_020039208	Pde1c	0.440175	2.53278	B	LOC101897534	0.555852
XM_005189311	mfas	1.57351	2.53254	E	LOC101898215	0.555852
XR_002194920	OstDelta	-0.514694	-2.53149	NA	NA	0.556241
XM_005175026	Klp10A	-0.338291	-2.5294	NA	LOC101899268	0.557868
XM_005182375	Dbp45A	0.131261	2.52837	C	LOC101894862	0.558099
XM_005177137	Eip71CD	-0.176997	-2.52731	D	LOC101892829	0.558099
XM_005182249	CG15254	-0.560249	-2.52677	B	LOC101889180	0.558099
XM_011295618	Cbp80	0.18229	2.52632	A	LOC101898506	0.558099
XM_005187443	SIDL	-0.150684	-2.52312	E	LOC101898677	0.561064
XM_005181409	CG1738	-0.148842	-2.52081	A	LOC101890534	0.562123
XM_005190163	CG30183	-0.532213	-2.52081	NA	LOC101892755	0.562123
XM_011296211	CG13933	0.296937	2.5176	D	LOC101894507	0.563992
XM_020034862	Prosalpha5	-0.996437	-2.51715	C	LOC101892139	0.563992
XM_011298206	CG43088	1.15411	2.51599	NA	LOC105262582	0.563992
XM_020037039	CG43689	-0.332933	-2.5157	NA	LOC109612721	0.563992
XM_011296145	CG17278	0.278585	2.51568	NA	LOC101901061	0.563992
XM_020039515	CG16812	0.430201	2.51413	B	LOC101900935	0.564743
XM_020039533	Parp16	-0.287677	-2.51265	B	LOC101889338	0.564743
XM_020038094	sls	1.02533	2.5123	D	LOC101899878	0.564743
XM_005181266	CG32280	0.348875	2.51175	D	LOC101895655	0.564743
XM_020039096	Hipk	-0.745073	-2.51062	D	LOC101891841	0.564743
XR_002195112	CG34116	0.917186	2.50916	NA	NA	0.564743
XM_020038578	l(2)k09913	1.24384	2.50871	C	LOC101898099	0.564743
XM_011295279	CG2698	-0.67997	-2.50805	E	LOC101897416	0.564743
XM_005189170	Cdc42	-0.246236	-2.50797	A	LOC101899656	0.564743
XM_005190596	CG15602	-0.164468	-2.50737	NA	LOC101899559	0.564743
XM_005187374	lgs	-1.30719	-2.50705	C	LOC101900744	0.564743
XM_005180372	CG4467	-0.442141	-2.50605	E	LOC101893470	0.564743
XM_020035005	dnc	-0.297448	-2.50588	E	LOC101901297	0.564743
XR_002194277	CG10738	0.311239	2.50387	NA	NA	0.565899
XM_011292127	CG10916	-0.152703	-2.50177	NA	LOC105261491	0.565899
XM_005185502	CG6654	-0.150951	-2.50146	A	LOC101891412	0.565899
XM_020038273	Megf8	-0.93515	-2.50083	B	LOC101899394	0.565899
XM_005189437	Or7a	-0.247798	-2.50018	NA	LOC101890388	0.565899
XM_005177943	#N/A	-0.328118	-2.49971	NA	NA	0.565899
XR_002195398	CG17724	-0.334574	-2.49958	NA	NA	0.565899
XM_005177736	Cyp4g15	0.191035	2.49936	A	LOC101890640	0.565899
XM_005181246	Pex6	0.427509	2.49623	C	LOC101892613	0.568274
XM_020038835	CG13566	0.409327	2.49602	C	LOC101890725	0.568274
XM_020037240	Adf1	-0.143046	-2.495	NA	LOC109612839	0.568667
XM_005183306	CG10681	0.160776	2.49399	NA	LOC101889007	0.568951
XM_005182350	Sccpdh1	0.862504	2.49339	D	LOC101890829	0.568951
XM_011298199	Liprin-alpha	0.812826	2.49133	NA	LOC101900772	0.570432
XR_002194998	CG15570	0.254562	2.4908	NA	NA	0.570432
XM_020037331	bsh	0.218188	2.48967	B	LOC101901805	0.570978
XM_020035607	mbl	-0.205628	-2.48844	C	LOC101890349	0.571472
XM_005178023	POLDIP2	0.592132	2.4872	E	LOC101896867	0.571472
XM_005184987	IP3K2	-0.408651	-2.48656	A	LOC101889245	0.571472
XM_005188687	CG2680	-0.254188	-2.48499	A	LOC101887593	0.571472
XM_020035332	cib	-1.00201	-2.48498	NA	THY	0.571472
XM_005186692	#N/A	0.382464	2.48487	NA	NA	0.571472
XM_005181440	tud	-0.546116	-2.48412	C	LOC101896118	0.571472
XM_005182590	CG13038	-0.486241	-2.48379	D	LOC101901797	0.571472
XM_020037939	CG4789	-0.615469	-2.48059	A	LOC101896358	0.571472
XM_020037509	velo	0.171349	2.48015	D	LOC101890437	0.571472
XM_020035672	Tsp96F	-0.776749	-2.47972	NA	LOC101891276	0.571472
XM_011292982	htt	-0.277609	-2.47924	E	LOC101892436	0.571472
XM_005175489	lobo	0.639762	2.4792	NA	LOC101897605	0.571472
XM_011294567	CG4707	-0.172104	-2.47885	C	LOC101896016	0.571472
XM_020039256	foxo	0.753914	2.47872	NA	LOC101893612	0.571472
XM_020039143	CG8642	-0.377304	-2.47819	NA	LOC105262300	0.571472
XM_011298064	NetB	-0.389112	-2.47776	NA	LOC101897201	0.571472
XM_005180607	Prp3	0.823616	2.47681	D	LOC101901743	0.571507
XM_011295349	sbm	-0.343944	-2.47562	A	LOC101894878	0.571507
XR_891726	#N/A	-0.239911	-2.47519	NA	NA	0.571507
XM_011292586	prage	-0.265326	-2.47506	A	LOC101888243	0.571507
XM_005182929	CG4733	-0.649534	-2.47372	E	LOC101898490	0.571507
XM_020038322	AOX3	-0.533678	-2.47324	NA	LOC101901324	0.571507
XM_005179085	CG9400	0.331498	2.47282	A	LOC101898249	0.571507
XM_020036066	Oga	-0.919079	-2.4724	E	LOC101893356	0.571507
XM_005187626	CG42245	0.159754	2.46985	D	LOC101900619	0.573816
XM_005187076	Tango11	0.176636	2.46905	C	LOC101892977	0.573823
XM_005175619	PIG-S	0.153125	2.46852	E	LOC101896147	0.573823
XM_005192195	rau	-0.269457	-2.46756	NA	LOC101899042	0.574191
XM_020037030	CG11696	-0.244954	-2.46403	NA	LOC105261432	0.57725
XM_005178104	Uxt	-0.179076	-2.46316	E	LOC101895705	0.57725
XM_005184379	Uba1	0.553603	2.46248	C	LOC101897581	0.57725
XM_020035578	GstD1	-0.369881	-2.46243	NA	LOC109612013	0.57725
XR_891518	rdgB	1.02029	2.45882	NA	NA	0.58044
XM_011295020	Kdm4A	-0.134906	-2.45807	NA	LOC105261423	0.58044
XM_005184246	CG32196	-0.369905	-2.45787	D	LOC101889069	0.58044
XM_020037512	Rsph3	-0.235388	-2.4568	D	LOC101892397	0.580463
XM_020037876	gogo	-0.268024	-2.45596	D	LOC101892344	0.580463
XM_020035619	Tdc2	0.249576	2.4559	C	LOC101896057	0.580463
XM_020036948	CG32645	-0.199312	-2.45478	NA	LOC109612684	0.58073
XM_005180250	Rala	0.64572	2.45388	A	LOC101887670	0.58073
XM_020038713	CG6465	0.308806	2.45364	NA	LOC101900167	0.58073
XM_020039656	grp	-0.387586	-2.45239	NA	LOC101891848	0.58073
XM_005177749	Spn42Da	0.219409	2.45191	C	LOC101894196	0.58073
XM_020038567	POLDIP2	0.796842	2.45179	NA	LOC109613573	0.58073
XM_020038753	Marf	-0.36158	-2.45096	A	LOC101901601	0.580959
XM_005183970	CG9784	0.175635	2.44907	A	LOC101889124	0.581044
XM_020034622	CG14995	-0.522762	-2.44864	D	LOC101897730	0.581044
XM_011293404	#N/A	-0.625327	-2.44784	NA	NA	0.581044
XM_005181144	mgl	-0.294066	-2.44768	A	LOC101890934	0.581044
XM_020035882	mura	0.921365	2.44676	E	LOC101896752	0.581044
XM_005181796	CG13024	0.371397	2.44606	D	LOC101898362	0.581044
XM_005191261	Pcmt	0.219452	2.44576	NA	LOC101900759	0.581044
XM_005183818	AGO2	-0.776673	-2.44562	A	LOC101892105	0.581044
XM_011295853	#N/A	-0.310513	-2.44458	NA	NA	0.581044
XM_005184209	CG34404	0.209162	2.44419	E	LOC101898436	0.581044
XM_020035181	grass	-1.21078	-2.44384	NA	LOC109611842	0.581044
XR_002194557	CG43088	0.899119	2.44291	NA	NA	0.581408
XM_005177043	Opa1	0.294616	2.44148	C	LOC101893625	0.582197
XM_005186761	CG4789	-0.410568	-2.441	A	LOC101896358	0.582197
XM_020037851	Sap47	-0.890462	-2.43642	E	LOC101888203	0.586861
XM_005191591	CG12112	-0.391985	-2.43483	NA	LOC101901777	0.586861
XM_020039805	CG32554	-0.351137	-2.43355	NA	LOC109614388	0.586861
XM_011298108	CrebA	0.298362	2.43323	D	LOC101895237	0.586861
XM_005191108	CG11453	-0.333981	-2.43274	NA	LOC101889154	0.586861
XM_020036847	AGO2	-0.480596	-2.43256	A	LOC101892105	0.586861
XM_020034678	GalT1	-0.176842	-2.43219	NA	LOC101891148	0.586861
XM_020036238	gsb-n	-0.256044	-2.43159	C	LOC101888883	0.586861
XM_005185543	mrt	-0.672186	-2.43156	E	LOC101898551	0.586861
XM_005188737	CG13962	0.194888	2.42966	B	LOC101896092	0.587815
XM_005176114	CrebB	0.620292	2.42954	A	LOC101888107	0.587815
XM_005184088	#N/A	0.141935	2.42749	NA	NA	0.589168
XM_005186690	CG7560	-0.423356	-2.42696	A	LOC101899703	0.589168
XM_011293211	CG46280	0.785739	2.42542	E	LOC101891001	0.589168
XM_011292606	Pvr	0.346537	2.42489	B	LOC101895886	0.589168
XM_005190205	CG1827	-0.16234	-2.42485	C	LOC101900755	0.589168
XM_020034693	Sema2a	-0.211975	-2.42446	C	LOC101898415	0.589168
XM_005183177	CG42456	0.231867	2.42409	D	LOC101896573	0.589168
XM_020038993	snky	-0.180775	-2.4218	NA	LOC109613843	0.589252
XM_011297909	Sclp	0.255183	2.42093	NA	LOC105262546	0.589252
XM_020039336	Ppcs	-0.264295	-2.42063	NA	LOC101896548	0.589252
XM_020037239	CG7718	-0.348471	-2.42047	NA	LOC109612838	0.589252
XM_005189120	Kmn1	0.1925	2.42033	A	LOC101891201	0.589252
XM_011295271	wupA	-0.243151	-2.42031	NA	LOC105261440	0.589252
XM_005187926	CG12375	-0.545404	-2.41928	NA	LOC101892810	0.589774
XR_002195008	#N/A	-0.243489	-2.41646	NA	NA	0.59024
XM_011297140	dbo	-0.187123	-2.41616	D	LOC101892015	0.59024
XM_005184899	CG34015	-0.835747	-2.41551	D	LOC101889070	0.59024
XM_005187365	Galphas	0.731942	2.41537	C	LOC101899076	0.59024
XM_020036851	CG33639	-0.272586	-2.41506	A	LOC101895664	0.59024
XM_005189168	CG14231	0.402811	2.41458	A	LOC101899321	0.59024
NM_001308986	CCT7	0.147087	2.41444	E	LOC101887278	0.59024
XM_005175876	Prx3	0.208039	2.41401	E	LOC101892084	0.59024
XM_011294859	jnj	0.157864	2.41299	B	LOC101896293	0.590652
XM_011292057	toc	0.325114	2.41246	B	LOC101888563	0.590652
XM_005179179	Grip128	-0.194139	-2.41122	A	LOC101898645	0.591435
XM_020039064	Su(var)3-7	-0.641408	-2.41015	E	LOC101893294	0.592012
XM_020038455	Pdp1	-0.44122	-2.40795	D	LOC101898335	0.593491
XM_005188707	Obp56a	-0.773868	-2.40728	NA	LOC101891025	0.593491
XM_005181395	ABCA	-1.13634	-2.40715	A	LOC101888352	0.593491
XM_005188920	Syt4	-0.344609	-2.40553	NA	LOC101899496	0.594325
XM_020037753	AgmNAT	0.19731	2.40528	NA	LOC101888370	0.594325
XM_005187334	Balat	0.906261	2.40179	C	LOC101892806	0.597949
XM_005178874	CG7966	-0.45868	-2.40094	B	LOC101892377	0.598268
XM_005184516	Hrd3	-0.474391	-2.39943	E	LOC101892564	0.59905
XR_002195039	#N/A	0.696818	2.39872	NA	NA	0.59905
XM_020039111	pasi2	0.886344	2.39851	E	LOC101893667	0.59905
XM_020037378	Smr	-0.94542	-2.3969	A	LOC101893260	0.599191
XM_011296291	l(2)k09848	0.154277	2.39628	C	LOC101896838	0.599191
XM_011296918	slim	-0.787825	-2.39568	C	LOC101891428	0.599191
XM_020039196	mAChR-C	0.471031	2.39546	A	LOC101892698	0.599191
XM_020037977	up	0.946695	2.39541	A	LOC101894605	0.599191
XM_020036406	Strica	-0.310594	-2.39332	NA	LOC109612390	0.600492
XM_005186565	Peritrophin-A	0.416419	2.39237	A	LOC101889312	0.600492
XM_005189415	CG8206	-0.15093	-2.39179	A	LOC101900928	0.600492
XM_005180896	Cyp4p3	0.205614	2.39169	C	LOC101891224	0.600492
XM_020036403	CG30460	-0.465148	-2.39086	C	LOC101889476	0.600492
XM_020035353	CG34408	-0.247451	-2.38989	A	LOC101889631	0.600492
XM_020038143	Nmda1	-0.324394	-2.38958	C	LOC101893093	0.600492
XM_005192164	eIF5B	0.208568	2.3886	NA	LOC101892764	0.600492
XM_020036123	eIF4G2	-0.52798	-2.38841	E	LOC101890484	0.600492
XM_005189746	Gat	0.428749	2.38811	F	LOC101891311	0.600492
XM_005191763	spn-F	0.466339	2.38754	E	LOC101892703	0.600492
XM_020038630	CG33054	0.180283	2.38727	B	LOC101890164	0.600492
XM_005191558	Plod	0.197513	2.38578	NA	LOC101894785	0.600492
XM_005175746	flw	-0.274407	-2.38493	NA	LOC101896435	0.600492
XM_020034925	Shab	-0.212428	-2.3838	D	LOC101900306	0.600492
XM_020038321	CG17839	1.11459	2.38333	D	LOC101887829	0.600492
XM_020034713	CG42322	-0.314454	-2.38214	E	LOC101892654	0.600492
XM_020034886	CG32187	-0.306017	-2.38192	NA	LOC109611712	0.600492
XM_020039889	CG9826	0.261803	2.38182	C	LOC101895873	0.600492
XM_005176451	FAM21	0.225737	2.38181	C	LOC101898985	0.600492
XM_011292414	Lpin	-0.539987	-2.3814	C	LOC101889227	0.600492
XM_005183002	CG14196	0.216382	2.38088	A	LOC101896173	0.600492
XM_011298187	bif	0.240262	2.38084	A	LOC101893510	0.600492
XM_011293455	CG5162	-0.310006	-2.37937	A	LOC101899684	0.600969
XM_005188916	#N/A	-1.10242	-2.3786	NA	NA	0.600969
XM_020037388	#N/A	0.940827	2.37842	NA	NA	0.600969
XR_891556	rpk	0.21444	2.37743	NA	NA	0.600969
XM_020036508	Tep1	-0.504342	-2.37728	NA	LOC105261751	0.600969
XM_005188996	Claspin	-0.175466	-2.37699	D	LOC101898513	0.600969
XM_005184392	CG31357	0.206896	2.376	B	LOC101899639	0.601493
XM_011297798	CG8839	1.05093	2.3753	C	LOC101897726	0.601643
XM_005183928	PMCA	-0.316656	-2.37398	A	LOC101896762	0.602579
XM_011295561	CG8925	0.256667	2.37254	E	LOC101895385	0.603216
XM_005175361	pall	-0.513287	-2.37168	D	LOC101887828	0.603216
XR_002195555	#N/A	0.209557	2.3708	NA	NA	0.603216
XM_011293406	CG42700	0.728878	2.37047	C	LOC101889864	0.603216
XM_005190853	sotv	0.196292	2.36973	C	LOC101901385	0.603216
XM_005181862	fat-spondin	0.319114	2.36937	C	LOC101894809	0.603216
XM_020035103	Cdep	-0.470636	-2.36847	E	LOC101895466	0.603216
XM_020039461	CG30428	-0.228175	-2.36814	B	LOC101897536	0.603216
XM_020038589	CG4553	-0.272451	-2.36794	E	LOC101898174	0.603216
XM_011294608	sud1	-0.137813	-2.36709	E	LOC101896147	0.603216
XM_011295114	Spn55B	0.583988	2.36571	C	LOC101892339	0.603216
XM_005177621	Syn2	-0.139898	-2.36512	C	LOC101899218	0.603216
XM_005177783	Tsp26A	-0.788039	-2.3649	B	LOC101899844	0.603216
XM_020036931	tyf	0.946555	2.36412	A	LOC101893119	0.603216
XM_005185495	CG6654	0.135205	2.36406	A	LOC101890095	0.603216
XM_005181405	CG13369	-0.165418	-2.36295	A	LOC101889863	0.603216
XM_011292527	cib	-0.227786	-2.3628	NA	THY	0.603216
XM_020035469	CG5946	0.160435	2.36269	D	LOC101897795	0.603216
XM_011295779	gkt	0.815637	2.36266	C	LOC101892347	0.603216
XM_005190966	CG2712	0.143111	2.36014	NA	LOC101893168	0.603311
XM_020036486	Dhc16F	-0.218198	-2.35945	NA	LOC109612436	0.603311
XR_002195329	#N/A	0.184396	2.35934	NA	NA	0.603311
XM_005180970	CG12118	-0.187835	-2.35887	A	LOC101889177	0.603311
XM_005180871	Hayan	0.54328	2.35885	A	LOC101901626	0.603311
XM_005187123	Obp57c	-0.383577	-2.35854	NA	LOC101900684	0.603311
XM_005188344	Git	0.227772	2.35843	C	LOC101888724	0.603311
XM_005181087	AstA-R1	-0.280585	-2.3581	A	LOC101895720	0.603311
XM_005185349	Naa80	0.631979	2.35678	E	LOC101893085	0.604282
XM_011295504	Snmp2	-0.58522	-2.35334	D	LOC101895787	0.607926
XM_005191954	#N/A	-0.345278	-2.35219	NA	NA	0.608676
XM_005186892	CG4957	0.156459	2.35145	B	LOC101889015	0.60891
XM_005180869	CG6340	0.488232	2.35048	A	LOC101901302	0.609443
XM_005190166	sick	-0.246126	-2.34939	NA	LOC101893279	0.610123
XM_005191501	CG16721	0.162117	2.34812	A	LOC101898288	0.61046
XM_005188403	corn	0.242997	2.3463	D	LOC101897930	0.61046
XM_005191517	Src64B	-0.167543	-2.34603	D	LOC101901281	0.61046
XM_020035503	CG11456	-0.728234	-2.34524	D	LOC101896161	0.61046
XM_020038931	Lsd-1	0.320844	2.34516	E	LOC101897935	0.61046
XM_005191492	CG17065	0.183492	2.34391	A	LOC101896792	0.61046
XM_005182407	CG9300	-0.174077	-2.34349	D	LOC101900424	0.61046
XM_005179533	sau	0.117408	2.34324	B	LOC101898071	0.61046
XM_005187767	Tusp	-0.321917	-2.34323	E	LOC101895437	0.61046
XM_020039825	#N/A	0.354387	2.34312	NA	NA	0.61046
XM_011293504	lig	-0.241828	-2.34305	C	LOC101898981	0.61046
XM_005189352	Lk6	-0.394228	-2.342	E	LOC101890212	0.610949
XM_020035224	Spn	-0.548329	-2.34104	D	LOC101898473	0.610949
XM_020039790	CG32112	0.228681	2.34084	NA	LOC109614373	0.610949
XM_020035167	Asx	0.544995	2.34048	C	LOC101895298	0.610949
XM_005175310	unk	-0.603553	-2.33752	E	LOC101893333	0.61177
XM_020039254	Cyp6a21	-0.224559	-2.33733	NA	LOC101892586	0.61177
XM_011292283	CG8516	0.406361	2.33642	E	LOC101892775	0.61177
XR_002194232	#N/A	-0.830634	-2.33614	NA	NA	0.61177
XM_020036584	Nhe3	0.767038	2.33598	B	LOC101901309	0.61177
XM_011293698	CG7971	-1.11535	-2.33581	D	LOC101891870	0.61177
XM_005189380	brn	-0.512008	-2.33573	B	LOC101894886	0.61177
XR_002194878	nmo	-0.552243	-2.33548	NA	NA	0.61177
XM_005188568	SmydA-5	0.621496	2.33487	C	LOC101896186	0.611863
XM_011295230	CG33228	0.238827	2.33407	NA	LOC105261982	0.612192
XM_005185992	SelG	-0.138537	-2.33289	F	LOC101891825	0.613007
XM_011296439	CG6726	0.482364	2.33174	NA	LOC101900512	0.613599
XM_005178721	CG6204	0.26635	2.33126	E	LOC101896113	0.613599
XM_011293827	CG13038	0.352427	2.33078	D	LOC101901797	0.613599
XM_020037140	Usp47	1.00461	2.3287	D	LOC101896824	0.613599
XM_005189586	Mlf	0.250363	2.32813	C	LOC101889204	0.613599
XM_005181362	CG6218	0.330392	2.32812	E	LOC101896571	0.613599
XM_005179982	CG4382	-0.892969	-2.32808	E	LOC101887391	0.613599
XM_005181340	Cdc37	0.121273	2.32789	D	LOC101892958	0.613599
XM_005185471	CG10055	-0.180848	-2.32641	E	LOC101900739	0.613599
XM_011292167	Sam-S	0.423563	2.32565	B	LOC101898767	0.613599
XM_005191569	Ube3a	0.204449	2.32553	NA	LOC101896848	0.613599
XR_002195597	frac	0.132637	2.32521	NA	NA	0.613599
XM_020036815	Wnt5	0.534361	2.3243	C	LOC101892275	0.613599
XM_011293169	CG12106	0.180844	2.32341	A	LOC101889473	0.613599
XM_005189559	vn	-0.163212	-2.32331	D	LOC101899712	0.613599
XM_005184886	stx	-0.180365	-2.32178	A	LOC101901475	0.613599
XM_020036194	CG9444	0.440695	2.32163	E	LOC101892156	0.613599
XM_005179089	Kua	0.882324	2.32162	B	LOC101898939	0.613599
XM_011295208	#N/A	-0.51091	-2.32128	NA	NA	0.613599
XR_002195452	#N/A	-0.223641	-2.3204	NA	NA	0.613599
XM_011295896	CG14803	0.417186	2.3204	A	LOC101895266	0.613599
XR_002194888	CG1951	-0.230672	-2.32033	NA	NA	0.613599
XM_005183282	CG43088	0.585917	2.32014	A	LOC101899534	0.613599
XM_011296505	Fas1	-0.817251	-2.31895	B	LOC101890787	0.614441
XM_005177492	out	0.163444	2.31656	A	LOC101892204	0.616832
XM_005191690	CG8321	0.191831	2.31598	C	LOC101892421	0.616832
XM_011297368	fs(1)K10	-0.621716	-2.3155	A	LOC101897319	0.616832
XM_005190779	CG10638	0.357767	2.31356	D	LOC101901657	0.617433
XM_005185455	ea	0.257214	2.3129	E	LOC101898026	0.617433
XM_005180858	Rbsn-5	0.123336	2.31273	A	LOC101899579	0.617433
XR_002194986	#N/A	-0.231295	-2.31224	NA	NA	0.617433
XM_005187875	#N/A	-0.224128	-2.31194	NA	NA	0.617433
XR_002194231	#N/A	-0.348844	-2.31189	NA	NA	0.617433
XM_020036399	CG30460	0.370274	2.3105	C	LOC101889476	0.618539
XM_011294144	lili	-0.145929	-2.30767	NA	LOC101888828	0.621078
XM_005188225	CG4598	-0.840131	-2.30749	B	LOC101898681	0.621078
XM_005178451	UGP	-0.238702	-2.30685	D	LOC101895356	0.621231
XM_020036033	CG1801	-0.836622	-2.30614	A	LOC101891053	0.621472
XM_011294514	CG42249	0.415366	2.30487	A	LOC101888888	0.622441
XM_005179666	CG10147	-0.209027	-2.30392	NA	LOC101890645	0.622989
XM_005177646	Sin	-0.202985	-2.30329	D	LOC101889343	0.623143
XR_002194351	Naa60	0.309612	2.30236	NA	NA	0.623674
XM_005180398	Cyp28d1	0.892844	2.30165	A	LOC101897848	0.623913
XM_005177832	CG14220	0.173793	2.29935	A	LOC101893790	0.625462
XM_005177245	tko	-0.292575	-2.29869	A	LOC101896737	0.625462
XM_011291934	Tsen15	-0.239079	-2.29852	C	LOC101891966	0.625462
XM_011295410	smo	0.505837	2.29839	B	LOC101901033	0.625462
XM_005180937	AnxB10	0.60205	2.29653	A	LOC101898253	0.626945
XM_020035116	CG42340	-0.172626	-2.29604	NA	LOC109611827	0.626945
XM_005175283	Naa30A	0.124445	2.2957	A	LOC101888685	0.626945
XM_005176057	mod	0.973809	2.29402	E	LOC101894136	0.627674
XM_005175351	CG15203	-0.403625	-2.29212	E	LOC101900993	0.627674
XM_011294686	DnaJ-1	0.752735	2.29078	D	LOC101897347	0.627674
XM_005178406	Nup75	-0.17589	-2.28973	C	LOC101887727	0.627674
XM_011293611	slo	0.341105	2.2897	E	LOC101896394	0.627674
XM_005177517	CG4502	0.285332	2.28968	B	LOC101896504	0.627674
XM_020037170	Flo1	-0.82669	-2.2887	C	LOC101901446	0.627674
XM_020037704	CG34126	-0.567494	-2.28785	B	LOC101900042	0.627674
XM_020037601	#N/A	-0.258083	-2.28749	NA	NA	0.627674
XM_011292049	Pus1	-0.855829	-2.28723	E	LOC101890580	0.627674
XM_005185745	sea	0.25723	2.28589	E	LOC101888659	0.627674
XM_005185798	unc	-0.19397	-2.28566	A	LOC101899016	0.627674
XM_005175520	CG33514	0.242463	2.28459	NA	LOC101888865	0.627674
XM_020035447	CG34183	-0.397942	-2.28423	B	LOC101889171	0.627674
XR_002194162	#N/A	-0.190312	-2.28411	NA	NA	0.627674
XM_011297038	Rb97D	-0.178613	-2.28383	NA	LOC101895001	0.627674
XM_005188598	obst-B	0.323019	2.2838	B	LOC101901214	0.627674
XM_011296585	#N/A	-0.184486	-2.28362	NA	NA	0.627674
XM_011293320	sano	0.713913	2.28343	C	LOC101898254	0.627674
XM_005188877	CtIP	-0.160166	-2.28297	D	LOC101892184	0.627674
XM_005179432	Alp13	-0.658944	-2.2828	E	LOC101896690	0.627674
XM_005180732	spri	-0.593177	-2.28194	A	LOC101893749	0.627674
XM_020038939	bdg	0.259517	2.28178	C	LOC101900224	0.627674
XM_005187837	CG11191	0.21443	2.28162	C	LOC101892633	0.627674
XM_011291867	CG13995	-0.235918	-2.28118	B	LOC101897900	0.627674
XM_020037259	sad	0.182513	2.2808	E	LOC101901025	0.627674
XM_011291933	Fem-1	0.285708	2.28047	C	LOC101891691	0.627674
XM_005177660	GILT3	0.363667	2.28046	E	LOC101892033	0.627674
XM_005178934	CG32801	-0.280061	-2.28042	A	LOC101888756	0.627674
XM_005188175	Cortactin	0.911439	2.27694	E	LOC101890336	0.630939
XM_020035158	CG14760	0.260629	2.27689	C	LOC101895823	0.630939
XM_011294072	AP-1gamma	-0.430876	-2.27641	A	LOC101901253	0.630939
XM_005176045	jus	0.292601	2.27564	E	LOC101892199	0.631057
XR_891788	#N/A	-0.392766	-2.27531	NA	NA	0.631057
XM_020035180	grass	0.369397	2.27428	E	LOC101890818	0.631057
XM_005190775	CG16903	0.157459	2.27348	A	LOC101900987	0.631057
XM_020034700	ZnT63C	0.570628	2.27329	NA	LOC101901129	0.631057
XM_011296039	CG12375	0.16158	2.2728	NA	LOC101892810	0.631057
XM_005180190	MFS16	0.502553	2.27212	C	LOC101892556	0.631057
XM_011294687	rg	-0.616994	-2.27186	A	LOC101897857	0.631057
XM_005175815	St1	-0.233735	-2.27125	D	LOC101895814	0.631057
XM_005190435	CG8405	0.650162	2.27114	C	LOC101900986	0.631057
XM_020037752	AgmNAT	0.224315	2.27051	NA	LOC109613189	0.631057
XM_020034828	CAP	0.234964	2.27036	C	LOC101892774	0.631057
XM_020035900	CG46280	-0.885765	-2.26912	E	LOC101891001	0.631558
XM_020038714	CG6726	0.584277	2.26878	NA	LOC109613648	0.631558
XM_005177421	cerv	0.196784	2.26849	C	LOC101894964	0.631558
XM_011298010	Ptpmeg	0.212226	2.26777	D	LOC101895697	0.631622
XM_011296085	CG8176	-0.215038	-2.26746	E	LOC101898462	0.631622
XM_005176602	kz	-0.18953	-2.26621	A	LOC101894576	0.632423
XM_020037648	CG46312	-0.227528	-2.26504	NA	LOC109613123	0.632423
XM_011293096	Ho	-0.413815	-2.26502	E	LOC101894027	0.632423
XM_005186191	Ag5r2	-0.180125	-2.26458	NA	LOC101897472	0.632423
XM_005181840	CG9044	-0.890372	-2.26418	B	LOC101890827	0.632423
XM_011296225	CG42541	-0.176525	-2.26391	NA	LOC101900511	0.632423
XM_005178905	Corp	0.255548	2.26225	A	LOC101898991	0.633559
XM_020037359	Vrp1	0.231241	2.26178	C	LOC101900737	0.633559
XM_020036122	eIF4G2	-0.667223	-2.26157	E	LOC101890484	0.633559
XM_005177552	GCS2alpha	0.57282	2.26067	A	LOC101887491	0.634092
XM_020035700	CRMP	-0.848595	-2.25955	NA	LOC101895117	0.634928
XM_011297205	Eip63E	0.626027	2.25881	NA	LOC101891844	0.635256
XM_020036006	sano	-0.502112	-2.25786	C	LOC101898254	0.635863
XM_005185426	CG8785	0.506573	2.25724	C	LOC101892734	0.635988
XR_002194354	CG31365	0.908807	2.25575	NA	NA	0.635988
XM_011295079	Rcd5	-0.403145	-2.25551	D	LOC101892225	0.635988
XM_011296481	Marf	-0.382685	-2.25506	A	LOC101901601	0.635988
XM_011296238	Nrg	-0.337168	-2.25496	A	LOC101890678	0.635988
XM_005182489	CG9601	-0.391802	-2.25478	E	LOC101899475	0.635988
XR_002195012	#N/A	-0.290551	-2.25437	NA	NA	0.635988
XM_011296419	Psn	0.366019	2.25345	D	LOC101890341	0.636109
XM_005182352	cert	0.36636	2.25332	D	LOC101891112	0.636109
XM_020039847	Syx1A	-0.281668	-2.25239	E	LOC101887659	0.636694
XM_005179683	mEFTs	0.113698	2.25146	B	LOC101893685	0.636998
XM_020038357	#N/A	0.246071	2.25119	NA	NA	0.636998
XM_020039127	CG9171	-0.22751	-2.25056	B	LOC101888153	0.637019
XM_005180961	CG6414	-0.393828	-2.25016	A	LOC101887955	0.637019
XM_005191817	trbl	-0.15467	-2.24971	D	LOC101901443	0.637019
XM_011292902	Nrg	-0.395951	-2.24915	A	LOC101899792	0.637019
XM_005179641	Tsp42Eo	-0.157878	-2.24878	C	LOC101900832	0.637019
XM_005188708	Obp56d	-0.421222	-2.24778	NA	LOC101891197	0.637099
XR_002194137	CG31898	0.174681	2.24776	NA	NA	0.637099
XM_005190543	Utx	-0.292314	-2.24703	NA	LOC101890730	0.6372
XM_020038218	CG11263	0.440763	2.24581	D	LOC101901647	0.6372
XM_005189459	#N/A	0.320158	2.24565	NA	NA	0.6372
XM_011295699	Vmat	0.449629	2.24535	C	LOC101899816	0.6372
XM_020038874	gish	0.221043	2.24499	E	LOC101899083	0.6372
XM_005183644	RabX4	-0.309979	-2.24483	E	LOC101890709	0.6372
XR_002194871	#N/A	-0.316495	-2.24376	NA	NA	0.63725
XM_011296355	RhoGEF4	-0.15444	-2.24351	NA	LOC105262153	0.63725
XM_011295728	YL-1	-0.397341	-2.24337	E	LOC101899546	0.63725
XM_005192070	Fur2	0.182418	2.2403	NA	LOC101889562	0.639031
XM_020034582	Src42A	-0.407785	-2.24025	NA	LOC101891623	0.639031
XM_005189195	CG4020	0.164589	2.23985	A	LOC101889437	0.639031
XM_005176165	Atet	-0.284467	-2.23973	B	LOC101897386	0.639031
XM_005187574	CG3301	-0.321066	-2.23943	A	LOC101892059	0.639031
XR_002194401	CG15111	0.186006	2.23916	NA	NA	0.639031
XM_020039711	RhoGAP68F	0.501929	2.23859	D	LOC101896199	0.639031
XM_011297146	RPA3	0.44162	2.2375	B	LOC101895165	0.639031
XM_005178927	Tsp5D	-0.332476	-2.23743	A	LOC101887498	0.639031
XM_020038697	frm	0.296236	2.23729	NA	LOC109613637	0.639031
XM_005176475	egr	0.455441	2.23619	C	LOC101887883	0.639738
XM_005189860	#N/A	-0.203656	-2.23581	NA	NA	0.639738
XM_020035481	aop	0.619347	2.23463	B	LOC101889403	0.640448
XM_005180548	ORY	0.167606	2.23383	E	LOC101892095	0.640448
XM_011293299	Doa	-0.162324	-2.23325	NA	LOC105261684	0.640448
XR_002194415	#N/A	-0.137334	-2.2331	NA	NA	0.640448
XM_005177647	Smyd4-2	-0.133774	-2.23293	D	LOC101889518	0.640448
XM_005187910	CG6972	-0.396807	-2.23197	E	LOC101890208	0.641094
XM_005176700	CG14997	0.220718	2.23134	D	LOC101897148	0.641308
XM_005190371	btz	0.292545	2.23006	E	LOC101889268	0.641783
XM_011292005	Os-C	-0.398313	-2.22974	E	LOC101896109	0.641783
XM_005185698	CG7252	-2.37316	-2.22901	D	LOC101895259	0.641783
XM_005177564	rush	0.13094	2.22824	A	LOC101889675	0.641783
XM_005183577	CG14562	-0.810048	-2.22797	D	LOC101894163	0.641783
XM_020036032	#N/A	-0.814961	-2.2278	NA	NA	0.641783
XM_011292904	VhaAC39-1	0.248352	2.2277	NA	LOC105261625	0.641783
XM_005177409	Cyp301a1	0.221552	2.22727	C	LOC101893000	0.641783
XM_005175024	Task7	-0.254366	-2.22447	A	LOC101898919	0.644856
XM_020037214	Sp212	-0.23616	-2.22286	NA	LOC101888313	0.644909
XM_005174711	Def	-0.573952	-2.22255	C	LOC101888043	0.644909
XM_011295337	gish	-0.250745	-2.22251	E	LOC101888083	0.644909
XM_005186389	#N/A	0.587961	2.22236	NA	NA	0.644909
XM_005180369	Cdc16	-0.121704	-2.22172	E	LOC101892955	0.644909
XM_020038334	CG9425	-0.740725	-2.22166	D	LOC101887992	0.644909
XM_011292325	Pcf11	0.802467	2.22111	C	LOC101893573	0.645035
XM_005186585	CG3448	-0.245839	-2.22007	D	LOC101893032	0.645448
XM_005175174	CG42540	-0.22975	-2.21987	NA	LOC101897719	0.645448
XM_020037694	cher	-0.440293	-2.21928	E	LOC101894339	0.64563
XM_005189184	CG6758	0.14345	2.21823	C	LOC101887420	0.646408
XM_005189996	Hipk	-0.737964	-2.21763	D	LOC101891841	0.646599
XM_020040160	NO66	-0.672359	-2.21706	A	LOC101891741	0.646738
XM_011296905	side-VI	-0.238725	-2.2161	NA	LOC101898341	0.646912
XM_011292679	Fkbp59	-0.415984	-2.21602	B	LOC101901006	0.646912
XR_002194297	Su(Tpl)	-0.598546	-2.215	NA	NA	0.647035
XM_005189285	AsnS	0.556868	2.21471	NA	LOC101894001	0.647035
XM_005189592	Ance-3	-0.218911	-2.21244	NA	LOC101890617	0.647035
XM_005182004	gsb	0.268722	2.21236	C	LOC101888702	0.647035
XM_020039029	#N/A	1.04453	2.21219	NA	NA	0.647035
XM_020036562	CG17121	-0.512402	-2.21178	E	LOC101890942	0.647035
XM_020040082	Gfrl	-0.200963	-2.21168	NA	LOC109614505	0.647035
XR_002195400	Trs33	0.157624	2.21084	NA	NA	0.647035
XM_011295629	CG1695	-0.34535	-2.20906	A	LOC101887810	0.647035
XM_005189919	CG12541	-0.164267	-2.20899	NA	LOC101893044	0.647035
XM_005187830	CG14817	0.151192	2.20898	A	LOC101891424	0.647035
XM_020038283	TTLL4A	-0.572687	-2.20831	B	LOC101893320	0.647035
XR_002194423	LRR	0.219702	2.20828	NA	NA	0.647035
XM_011297332	bora	-0.137037	-2.20743	D	LOC101892888	0.647035
XM_011292742	Tip60	-0.43952	-2.2073	A	LOC101893518	0.647035
XM_020037265	IP3K2	-0.249566	-2.20603	A	LOC101889245	0.647035
XM_020036697	Nedd4	0.492444	2.20541	D	LOC101897810	0.647035
XM_011296102	Not3	0.369014	2.20468	C	LOC101900866	0.647035
XM_005185671	CG3061	0.242551	2.20342	E	LOC101891015	0.647035
XM_011295502	Eps-15	1.06993	2.20335	C	LOC101894108	0.647035
XM_005180736	vret	0.126377	2.20307	A	LOC101894700	0.647035
XM_005184176	Mlc-c	-0.272706	-2.20267	B	LOC101892907	0.647035
XM_020039292	spirit	0.303911	2.20243	A	LOC101890464	0.647035
XR_002194895	Rbcn-3A	-0.123276	-2.20203	NA	NA	0.647035
XM_020038482	CG2233	-0.923905	-2.20161	NA	LOC105262101	0.647035
XM_005174901	HLH4C	-0.224555	-2.20161	NA	LOC101890739	0.647035
XM_005174882	Scr	-0.247458	-2.20148	E	LOC101887370	0.647035
XM_005176051	Su(var)3-7	0.341485	2.20148	E	LOC101893294	0.647035
XM_005182628	CG3604	0.267857	2.20147	B	LOC101893362	0.647035
XM_011293738	cert	-0.839766	-2.20086	D	LOC101891112	0.647035
XM_020034714	CG42322	-0.165279	-2.20047	E	LOC101892654	0.647035
XM_020036890	Camta	-0.338075	-2.2001	C	LOC101895484	0.647035
XM_011292600	CG46385	-0.376176	-2.20007	C	LOC101895243	0.647035
XR_225600	spn-E	-0.306165	-2.19975	NA	NA	0.647035
XR_002195302	#N/A	0.238013	2.19949	NA	NA	0.647035
XM_020036077	Rpn3	-0.732516	-2.19903	B	LOC101897043	0.647035
XM_005180491	mod(mdg4)	0.149575	2.19896	E	LOC101896750	0.647035
XM_005181167	Nrx-IV	-0.284399	-2.19884	D	LOC101894751	0.647035
XM_005179269	Ssadh	0.14733	2.19657	E	LOC101900308	0.648889
XM_005180853	Ac13E	-0.265175	-2.19625	A	LOC101898652	0.648889
XR_002195448	CG33639	-0.257016	-2.1961	NA	NA	0.648889
XM_005185338	CG13003	-0.349936	-2.19551	NA	LOC101892224	0.648995
XM_020035934	mbl	-0.23221	-2.19512	NA	LOC101891435	0.648995
XM_005192054	#N/A	-0.251979	-2.1947	NA	NA	0.648995
XM_005190789	CG16985	0.14075	2.19375	D	LOC101888386	0.64967
XR_002194636	CG1951	-0.195595	-2.19276	NA	NA	0.65027
XM_011295667	CG42268	-0.401848	-2.19223	D	LOC101900861	0.65027
XM_005189405	CG6000	0.15179	2.1916	E	LOC101899256	0.65027
XM_005189198	CG4020	-0.447829	-2.19154	A	LOC101889946	0.65027
XM_005182537	toc	0.672022	2.19063	B	LOC101892669	0.650895
XM_005188250	Myc	-0.654752	-2.18949	A	LOC101887976	0.651819
XM_020035525	DIP-beta	-0.175057	-2.18816	NA	LOC101895362	0.652029
XM_020038274	kek6	-0.195547	-2.18809	E	LOC101889318	0.652029
XM_005177354	mei-9	0.162902	2.18736	A	LOC101898931	0.652029
XM_020036029	ABCA	0.854546	2.18575	A	LOC101888352	0.652029
XM_005187691	Obp99c	-0.661163	-2.1855	E	LOC101896776	0.652029
XM_011292330	bol	-0.335553	-2.18474	D	LOC101897560	0.652029
XM_020036063	Unc-115a	0.269686	2.18474	E	LOC101894154	0.652029
XM_005182187	CG17919	0.781943	2.18455	E	LOC101891923	0.652029
XM_020035919	scramb1	0.178903	2.18438	D	LOC101895194	0.652029
XM_020037684	snz	-0.258958	-2.18384	A	LOC101891826	0.652029
XM_011292989	CG42458	-0.196084	-2.18374	NA	LOC101895073	0.652029
XM_020038839	CG7924	0.474888	2.18353	C	LOC101890556	0.652029
XM_011297822	Cyp28d1	-0.155868	-2.18326	C	LOC101900413	0.652029
XM_011298069	phr	-0.883464	-2.18323	C	LOC101901733	0.652029
XM_005189596	CG5880	0.850305	2.1819	E	LOC101891310	0.653224
XM_005181242	Dek	0.143206	2.18077	C	LOC101892152	0.653943
XM_005184503	BuGZ	-0.237117	-2.18049	B	LOC101890042	0.653943
XM_020036923	CG8944	0.185416	2.17939	A	LOC101890372	0.65452
XM_005183511	kmr	-0.413579	-2.17919	E	LOC101897407	0.65452
XM_011293878	nito	-0.739869	-2.17873	C	LOC101888070	0.654563
XM_005181048	CG15515	0.308222	2.17783	E	LOC101888300	0.655189
XM_020038230	sev	-0.209839	-2.17603	NA	LOC101896128	0.655466
XM_005175227	ssp7	0.299317	2.17536	NA	LOC101893459	0.655466
XM_005190241	Rtf1	0.140578	2.17523	NA	LOC101894122	0.655466
XM_005190337	CG13197	-0.132466	-2.17491	NA	LOC101897876	0.655466
XM_005184757	CG14669	-0.225156	-2.17443	NA	LOC101891820	0.655466
XR_002194595	kmr	-0.445251	-2.17429	NA	NA	0.655466
XM_011292334	Adf1	0.214155	2.17381	D	LOC101900889	0.655466
XM_005178539	CG2540	-0.149636	-2.17335	E	LOC101895999	0.655466
XM_005176634	CG15522	-0.234809	-2.17244	E	LOC101900643	0.655466
XM_011295565	CG7378	-0.173803	-2.17225	A	LOC101896084	0.655466
XM_005179168	CG6299	-0.103478	-2.17202	A	LOC101896918	0.655466
XM_011292465	CG6299	-0.103478	-2.17202	A	LOC101896918	0.655466
XM_020036928	tyf	-0.461692	-2.17152	A	LOC101893119	0.655466
XM_011293959	SCAR	0.571572	2.1714	B	LOC101900962	0.655466
XM_005183910	cmpy	-0.171353	-2.16978	NA	LOC101894210	0.655466
XM_005180529	Droj2	0.147084	2.16952	E	LOC101888818	0.655466
XR_891772	#N/A	0.810536	2.16919	NA	NA	0.655466
XM_011292495	Start1	-0.19519	-2.16909	NA	LOC105261544	0.655466
XM_020039183	JIL-1	-0.199827	-2.16868	D	LOC101901720	0.655466
XM_005186332	CG11095	0.160028	2.16844	A	LOC101892116	0.655466
XM_005180256	CG10527	-0.225347	-2.16837	A	LOC101888348	0.655466
XM_011291975	eya	-0.555463	-2.16794	B	LOC101894691	0.655466
XM_011293056	CG6621	0.385659	2.16779	E	LOC101893072	0.655466
XM_005184780	mRpL47	-0.238195	-2.16717	E	LOC101895487	0.655733
XM_005188304	CG17202	-0.132959	-2.16675	E	LOC101896836	0.655735
XM_005190111	obst-E	-0.230857	-2.16481	NA	LOC101897315	0.657752
XM_020036799	lola	-0.217245	-2.16373	C	LOC101899414	0.657975
XM_011293960	SCAR	0.61867	2.16271	B	LOC101900962	0.657975
XM_005179753	hfw	0.175232	2.16259	A	LOC101890995	0.657975
XM_005191642	GluClalpha	-0.299167	-2.16247	NA	LOC101897196	0.657975
XM_011295805	CG11127	-0.532088	-2.16239	C	LOC101892631	0.657975
XM_020036651	CG7824	-0.411305	-2.16211	NA	LOC109612520	0.657975
XM_011295285	#N/A	-0.626056	-2.16128	NA	NA	0.658521
XM_011296513	CG9981	-0.183021	-2.16059	NA	LOC105262179	0.658849
XM_011297444	#N/A	-0.266618	-2.16019	NA	NA	0.658849
XM_005180596	#N/A	-0.45607	-2.15929	NA	NA	0.659496
XM_011293070	prominin-like	-0.527998	-2.15762	D	LOC101900316	0.661169
XM_020036554	dl	0.38503	2.15574	B	LOC101890596	0.662616
XM_011296265	Atf6	-0.356303	-2.15498	C	LOC101891499	0.662616
XM_005179558	Drep1	-0.319086	-2.15454	C	LOC101887617	0.662616
XM_020039109	CG4020	-0.354586	-2.15444	NA	LOC101891723	0.662616
XM_005182869	Adk1	0.259139	2.15393	D	LOC101888704	0.662616
XM_011296838	Spt6	0.111844	2.1529	NA	LOC101901381	0.662616
XM_011297820	CG42797	-0.294984	-2.15267	E	LOC101888859	0.662616
XM_020037755	PGAP1	1.01974	2.15225	A	LOC101890378	0.662616
XM_005175613	TrpRS	-0.348504	-2.15207	E	LOC101894960	0.662616
XM_011296521	CASK	0.632033	2.15183	E	LOC101887483	0.662616
XM_005191720	CG17931	0.104892	2.15152	E	LOC101897490	0.662616
XM_011294366	Best1	-0.839181	-2.15124	E	LOC101901310	0.662616
XM_011296837	CG9240	0.592724	2.15111	A	LOC101899995	0.662616
XM_005176104	Axs	-0.245389	-2.14963	A	LOC101901172	0.663794
XM_011296641	CG43658	-0.210846	-2.14941	A	LOC101893041	0.663794
XR_891614	#N/A	-0.161856	-2.14851	NA	NA	0.663887
XM_005176986	Kap3	-0.461249	-2.14851	A	LOC101899456	0.663887
XM_005176349	Rep	0.140908	2.14778	C	LOC101896735	0.664304
XM_005179921	CG10932	-0.174581	-2.14728	A	LOC101891048	0.664428
XM_005179727	Fkbp59	-0.238896	-2.14581	B	LOC101901006	0.665846
XM_005183293	CG17999	0.469611	2.14454	NA	LOC101901419	0.666989
XM_011293934	CG33181	-0.793305	-2.14368	A	LOC101889413	0.667598
XM_020039466	#N/A	-0.265767	-2.14245	NA	NA	0.668694
XM_005176971	CG2772	-0.228602	-2.14108	D	LOC101897441	0.669658
XM_005180458	verm	0.421654	2.14059	D	LOC101892557	0.669658
XM_005185469	Suv3	0.152774	2.1405	E	LOC101900390	0.669658
XM_011296601	CG8745	0.179759	2.13955	B	LOC101888323	0.670384
XM_020038207	CG9447	-0.38202	-2.13643	NA	LOC105262083	0.671546
XM_020039320	cno	-0.480542	-2.13634	E	LOC101892464	0.671546
XM_005181318	Gip	0.270187	2.13611	A	LOC101889688	0.671546
XM_005178403	lolal	0.124672	2.13526	C	LOC101887215	0.671546
XM_005174942	Acsl	-0.759866	-2.13516	C	LOC101899156	0.671546
XM_005191538	CG1090	-0.433528	-2.13513	E	LOC101891146	0.671546
XM_005183114	antdh	-0.328385	-2.13456	NA	LOC101899302	0.671546
XM_011292677	CG10194	0.192857	2.1339	B	LOC101888118	0.671546
XM_011294815	lobo	0.402597	2.13382	NA	LOC105261896	0.671546
XM_005179579	tws	0.876441	2.13281	E	LOC101891046	0.671546
XM_011297555	fus	-0.19114	-2.13193	C	LOC101899502	0.671546
XM_020036563	CG30281	-0.240126	-2.13173	C	LOC101895310	0.671546
XM_005189641	beat-Ia	-0.152326	-2.13168	NA	LOC101900403	0.671546
XM_020038065	CG42705	-0.269672	-2.13084	NA	LOC109613365	0.671546
XM_020038111	CG9527	0.194838	2.13062	B	LOC101894665	0.671546
XM_020039853	frac	0.158369	2.13027	NA	LOC109614422	0.671546
XM_020037400	Cad96Ca	-0.248201	-2.13015	NA	LOC101899591	0.671546
XR_002194289	mod(mdg4)	0.228566	2.1299	NA	NA	0.671546
XM_005186507	CG10936	0.540174	2.12918	C	LOC101893431	0.671546
XR_225625	#N/A	0.171192	2.12904	NA	NA	0.671546
XR_002194104	#N/A	-0.158492	-2.12872	NA	NA	0.671546
XM_005176219	MYPT-75D	-0.400384	-2.12818	D	LOC101890867	0.671546
XM_005191133	Sod1	0.219587	2.12814	NA	LOC101894298	0.671546
XM_020038007	PIG-Wb	-0.278389	-2.12807	B	LOC101889370	0.671546
XM_011292735	nopo	-0.47908	-2.127	A	LOC101888468	0.671546
XM_005177234	Ubi-p5E	0.223599	2.1266	A	LOC101895238	0.671546
XM_005183120	mRpL22	0.106074	2.12627	A	LOC101900324	0.671546
XM_020039472	CG8834	-0.184005	-2.125	NA	LOC101889327	0.671546
XM_020035498	stj	-0.700138	-2.1247	D	LOC101895300	0.671546
XM_005177724	aurB	0.169067	2.12469	B	LOC101888236	0.671546
XM_005182810	CG15369	0.36787	2.12333	E	LOC101894330	0.671546
XR_891816	#N/A	-0.157927	-2.12327	NA	NA	0.671546
XM_020038524	bocks	0.511667	2.12293	B	LOC101888379	0.671546
XR_002194376	ABCA	0.612409	2.1228	NA	NA	0.671546
XM_005176399	CAH9	0.211308	2.12266	E	LOC101890232	0.671546
XM_011297657	RAF2	0.277504	2.12265	NA	LOC101901223	0.671546
XM_005176688	Cep135	-0.234013	-2.12259	D	LOC101895236	0.671546
XM_005176726	ATPsynbeta	0.692231	2.12234	D	LOC101901126	0.671546
XM_005174839	PIG-N	-0.153018	-2.12175	C	LOC101894467	0.671546
XM_005181399	anox	0.209456	2.12162	A	LOC101888880	0.671546
XM_020037070	Tim17b	-0.296915	-2.12128	C	LOC101894710	0.671546
XM_020038225	CG3301	0.34818	2.12115	NA	LOC105262085	0.671546
XM_005187823	CG11655	0.423664	2.12016	A	LOC101890383	0.671546
XM_011298139	Ubi-p5E	0.189623	2.11981	A	LOC101895238	0.671546
XM_020039764	Ror	0.918115	2.1198	B	LOC101892762	0.671546
XM_020034580	gcm2	-0.132529	-2.11914	B	LOC101890354	0.671546
XM_011292843	ssp7	0.318481	2.11904	NA	LOC105261613	0.671546
XM_020036726	CG31028	0.224394	2.11863	E	LOC101890490	0.671546
XM_005180318	Dr	0.167651	2.11793	A	LOC101898943	0.671546
XM_011293356	tud	0.836577	2.11693	C	LOC101896118	0.671546
XM_005190642	cno	-0.350893	-2.11662	E	LOC101892464	0.671546
XM_011294100	CG10543	-0.927059	-2.11661	C	LOC101888706	0.671546
XM_020036072	ush	0.353085	2.1162	B	LOC101894324	0.671546
XM_005180244	CG34215	-0.382855	-2.11611	B	LOC101901460	0.671546
XR_002194350	Naa60	-0.28845	-2.11589	NA	NA	0.671546
XM_005178320	CG10311	0.185596	2.11518	C	LOC101887999	0.671546
XM_005180314	CG5543	-0.11119	-2.11486	C	LOC101898010	0.671546
XM_005183021	CG7884	0.218686	2.11385	A	LOC101899128	0.671546
XM_005185018	ttv	-0.192608	-2.11381	C	LOC101894872	0.671546
XM_011295682	CG15118	0.623845	2.11342	C	LOC101892454	0.671546
XR_002194778	#N/A	-0.197834	-2.11337	NA	NA	0.671546
XM_011293367	CG15890	0.188272	2.1128	A	LOC101889976	0.671546
XM_005186808	NFAT	-0.184426	-2.11268	A	LOC101889490	0.671546
XM_020035402	wake	-0.334604	-2.11257	E	LOC101890185	0.671546
XM_011295928	cbt	0.796958	2.11249	NA	LOC101894667	0.671546
XM_011294569	CG4707	0.0880978	2.11221	C	LOC101896351	0.671546
XR_002195289	blot	-0.177927	-2.11061	NA	NA	0.672596
XM_020034998	CG14352	-0.213622	-2.1104	NA	LOC109611766	0.672596
XM_011293313	AdamTS-A	0.883653	2.10984	E	LOC101895423	0.672596
XR_002194804	stum	-0.207649	-2.10961	NA	NA	0.672596
XM_005177875	Syb	0.605389	2.10947	C	LOC101900709	0.672596
XM_005184740	Cog8	0.425789	2.10783	B	LOC101888771	0.67371
XM_005183156	RtcB	-0.122612	-2.10748	B	LOC101891228	0.67371
XM_005182719	CG18766	0.137682	2.10748	B	LOC101893981	0.67371
XM_020037647	CG46312	-0.236601	-2.10709	NA	LOC109613123	0.67371
XM_005192151	CG18815	0.140374	2.10604	NA	LOC101890399	0.673947
XM_005177254	Cyp4ae1	0.67099	2.10579	A	LOC101898177	0.673947
XM_005191242	CG10477	0.278511	2.10575	D	LOC101897780	0.673947
XR_002194303	#N/A	0.275043	2.10392	NA	NA	0.675421
XM_020039996	qvr	-0.311357	-2.10266	C	LOC101890983	0.675421
XM_011297808	Ugt305A1	0.222689	2.10258	NA	LOC101891613	0.675421
XM_005177179	Ide	0.0888924	2.10232	D	LOC101899568	0.675421
XR_002195500	#N/A	0.216915	2.10182	NA	NA	0.675421
XM_005174824	san	0.126504	2.10181	C	LOC101892024	0.675421
XM_005175499	Pvf2	-0.237872	-2.10176	NA	LOC101899777	0.675421
XM_005181895	Gprk1	-0.531772	-2.10132	C	LOC101900028	0.675421
XM_005178872	Trf	-0.151589	-2.10117	B	LOC101892037	0.675421
XM_011295517	bip1	0.377649	2.10029	D	LOC101899644	0.676083
XM_005179968	elav	-0.276736	-2.09966	A	LOC101899346	0.676118
XM_005186890	CG8475	0.804373	2.09922	B	LOC101888316	0.676118
XM_020035220	Ythdc1	0.941705	2.09911	D	LOC101897901	0.676118
XM_005178971	Corin	-0.319304	-2.09799	C	LOC101894853	0.676637
XM_005186215	CG10804	-0.324546	-2.09796	A	LOC101901704	0.676637
XM_005178359	Mpcp2	0.163053	2.09696	D	LOC101894415	0.677462
XM_005176253	Ugt37D1	-0.210014	-2.09608	B	LOC101895816	0.677805
XM_020038476	CG43333	-0.321054	-2.09594	B	LOC101892635	0.677805
XM_011293543	nmdyn-D7	1.05122	2.09489	E	LOC101892323	0.67871
XM_020037635	Mur18B	0.340592	2.09412	NA	LOC109613113	0.679226
XM_005184444	rgr	0.175562	2.09357	F	LOC101893208	0.679243
XM_005179587	TFAM	0.182087	2.09335	E	LOC101892215	0.679243
XM_011295863	Obp49a	0.69627	2.09173	C	LOC101896672	0.68092
XR_002195567	GstD8	-0.189897	-2.09083	NA	NA	0.681615
XM_011297128	GABA-B-R2	0.19629	2.09032	NA	LOC101901494	0.681794
XM_020035741	#N/A	-0.127208	-2.08916	NA	NA	0.682713
XM_020037844	#N/A	0.124005	2.0884	NA	NA	0.682713
XM_005174814	GLS	0.552423	2.08836	C	LOC101890121	0.682713
XM_020039286	#N/A	-0.132227	-2.08812	NA	NA	0.682713
XM_005191061	pzg	0.890527	2.08764	D	LOC101895339	0.682847
XR_002195152	#N/A	0.152468	2.08671	NA	NA	0.683597
XM_011296658	BubR1	0.207447	2.08601	A	LOC101887526	0.683786
XM_005175812	comm	0.165069	2.08581	D	LOC101895292	0.683786
XM_011295110	CG41242	0.12568	2.08463	E	LOC101891474	0.684455
XM_005176724	ND-ACP	0.11781	2.08456	D	LOC101900705	0.684455
XM_005185461	CG12948	0.681912	2.08382	E	LOC101898723	0.684685
XM_005187746	mats	0.162307	2.08326	E	LOC101891603	0.684685
XM_011295781	CG12091	0.285163	2.0831	C	LOC101892514	0.684685
XM_020036082	CG31886	0.568369	2.08287	B	LOC101900487	0.684685
XM_005185902	CG13794	-0.411205	-2.08155	B	LOC101891596	0.685486
XM_011297420	CG11453	-0.699708	-2.08153	NA	LOC101888851	0.685486
XM_020035733	CG5830	-0.208928	-2.07961	D	LOC101890244	0.687592
XM_005178108	CG40485	0.176063	2.07817	A	LOC101896442	0.688728
XM_005176615	CG6330	0.182541	2.07802	E	LOC101896681	0.688728
XM_005176505	blw	0.159321	2.07665	C	LOC101893295	0.689462
XR_225748	#N/A	-0.299134	-2.07636	NA	NA	0.689462
XM_005190441	Vang	-0.136712	-2.07636	NA	LOC101887426	0.689462
XM_005180669	PIG-U	0.154444	2.07583	B	LOC101898310	0.689666
XM_020036058	Uros1	-0.26627	-2.07523	A	LOC101889179	0.689979
XM_005178279	Rab11	0.104098	2.07403	E	LOC101895881	0.691104
XM_020039148	CG1368	-0.18773	-2.07346	NA	LOC101897370	0.691373
XM_005183851	CG3699	0.684692	2.07232	A	LOC101897576	0.692428
XM_011294791	CG6144	-0.731859	-2.07179	B	LOC101894597	0.692637
XM_020038796	Miro	0.633515	2.07049	C	LOC101894135	0.693626
XM_005177283	kdn	0.256202	2.07032	A	LOC101888175	0.693626
XM_011292317	CG14478	-0.643267	-2.06938	C	LOC101891044	0.693888
XM_005179480	CG34396	-0.198028	-2.06918	C	LOC101889854	0.693888
XM_005183911	Nost	-0.305889	-2.06901	A	LOC101894381	0.693888
XM_011296080	cic	-0.31009	-2.06769	E	LOC101893878	0.695193
XM_011298204	Tsp	-1.3089	-2.06722	B	LOC101901673	0.695327
XM_005192141	Nipped-B	-0.476624	-2.06592	NA	LOC101888683	0.695686
XR_002195125	Ugt35B1	-0.187269	-2.06496	NA	NA	0.695686
XR_002194621	#N/A	-0.194321	-2.06483	NA	NA	0.695686
XM_005185169	CG5707	-0.168561	-2.06476	NA	LOC101890258	0.695686
XR_002195206	CG4021	-0.136302	-2.06438	NA	NA	0.695686
XM_005190678	CG5835	0.21331	2.06379	E	LOC101898625	0.695686
XM_020038055	lap	-0.274002	-2.06374	NA	LOC101888604	0.695686
XM_020035168	CG42496	0.192165	2.06365	C	LOC101893242	0.695686
XM_020038988	CG30281	0.159385	2.0636	NA	LOC101897531	0.695686
XM_005190873	SMC3	-0.278849	-2.06229	A	LOC101890560	0.696097
XM_005185707	Tat	-0.19756	-2.06193	D	LOC101897175	0.696097
XM_005190187	CG14937	-0.587932	-2.06188	NA	LOC101897533	0.696097
XM_005176639	CG4849	-0.100949	-2.06182	E	LOC101901451	0.696097
XR_225632	#N/A	-0.205918	-2.06017	NA	NA	0.69707
XM_011293134	CG8646	0.456677	2.05983	C	LOC101889355	0.69707
XM_020035583	GstD11	0.269282	2.05981	E	LOC101897797	0.69707
XM_011293565	fu	0.704749	2.05963	A	LOC101897342	0.69707
XM_005182054	CG31126	0.135462	2.05847	E	LOC101896223	0.697793
XM_005175555	CG34133	-1.15915	-2.05837	E	LOC101897999	0.697793
XM_020038209	CG9447	-0.202452	-2.05735	C	LOC101900977	0.698285
XM_011296980	LUBEL	-0.304925	-2.05728	B	LOC101898452	0.698285
XM_020039529	CG14947	-0.235539	-2.05646	NA	LOC105262366	0.698418
XM_005183487	CG2126	0.118087	2.05568	E	LOC101894100	0.698418
XM_005180801	#N/A	0.199701	2.05557	NA	NA	0.698418
XM_005186345	drongo	-0.165235	-2.05532	B	LOC101894392	0.698418
XM_005190657	RPA3	-0.277303	-2.05496	B	LOC101895165	0.698418
NM_001286904	l(2)37Cc	0.262205	2.05486	NA	prohibitin	0.698418
XM_011295153	nAChRalpha2	1.04923	2.0546	NA	Mda2	0.698418
XM_005181829	S6KL	-0.149659	-2.05349	A	LOC101888941	0.699002
XM_011297189	salto	0.61423	2.05345	D	LOC101888218	0.699002
XM_011295235	CG43102	-0.256243	-2.05298	E	LOC101893211	0.699143
XM_011293517	CG9646	-0.249867	-2.05217	C	LOC101894649	0.699753
XM_020039497	CG31550	0.353701	2.05079	E	LOC101898286	0.701164
XM_005188170	CG17279	0.399458	2.0495	E	LOC101889653	0.702165
XM_011292056	CG45049	-0.434961	-2.04933	E	LOC101891271	0.702165
XM_005180086	CG45050	-1.41426	-2.04766	E	LOC101889916	0.702288
XM_011293417	dpr8	-0.166532	-2.04703	NA	LOC101895602	0.702288
XM_005187762	CG11722	0.18337	2.04501	E	LOC101894609	0.702288
XM_005185326	Pmi	0.270996	2.04478	D	LOC101889930	0.702288
XM_020039275	CG5793	-0.610987	-2.04476	E	LOC101901278	0.702288
XM_005176206	CG14273	-0.301836	-2.04475	B	LOC101888624	0.702288
XM_020034587	goe	0.132325	2.04457	NA	LOC101887711	0.702288
XM_020037693	cher	0.658317	2.04392	E	LOC101894339	0.702288
XM_020036529	FipoQ	0.595033	2.04373	E	LOC101891288	0.702288
XM_005187763	wts	-0.194993	-2.04341	E	LOC101894767	0.702288
XM_020038471	Myc	0.501794	2.04283	A	LOC101887976	0.702288
XM_005184436	Obp28a	-0.215558	-2.04277	F	LOC101891874	0.702288
XM_005181055	CG11656	-0.12356	-2.0425	E	LOC101889406	0.702288
XM_005188730	Obp28a	-0.411382	-2.04243	A	LOC101894885	0.702288
XM_020034671	OtopLc	0.238509	2.0424	NA	LOC101900593	0.702288
XM_011296798	HIP-R	-0.160448	-2.04196	A	LOC101899258	0.702288
XM_005192043	Ugt36A1	0.664754	2.04138	B	LOC101899504	0.702288
XM_005180739	CG3156	-0.195401	-2.04093	A	LOC101895192	0.702288
XM_005180251	Rala	-0.56216	-2.04034	A	LOC101887670	0.702288
XM_020036989	Sfxn1-3	-0.307477	-2.04013	E	LOC101900090	0.702288
XM_005188236	CDC50	0.167808	2.04009	A	LOC101900396	0.702288
XM_005177767	Fbw5	0.19151	2.03995	B	LOC101897268	0.702288
XM_020038133	Rbp1-like	-0.257243	-2.03989	NA	LOC101887692	0.702288
XM_020035127	Mbs	-0.246234	-2.03909	D	LOC101890302	0.702288
XM_020035962	CG31068	-0.342937	-2.03863	E	LOC101888006	0.702288
XM_011293285	Nepl5	-0.384092	-2.03847	A	LOC101899856	0.702288
XM_011296422	CG10467	0.483346	2.03775	NA	LOC101891199	0.702288
XM_011296035	CG13842	0.14953	2.03771	E	LOC101891193	0.702288
XM_005179287	CG30428	-0.606428	-2.03739	E	LOC101888634	0.702288
XM_005178865	mon2	-0.140783	-2.03634	B	LOC101890992	0.702288
XM_005177697	CG42319	0.254323	2.03624	C	LOC101898065	0.702288
XM_020036966	cv-c	-0.233855	-2.03624	NA	LOC101898609	0.702288
XM_005187413	CG14229	0.12855	2.03551	NA	LOC101893436	0.702288
XM_005180743	SP1173	-0.222421	-2.03546	D	LOC101895892	0.702288
XM_005186238	CG13599	-0.128732	-2.03533	E	LOC101890842	0.702288
XM_011297102	WASp	0.639018	2.03465	NA	LOC101891727	0.702288
XM_005178841	Adf1	-0.144075	-2.03451	D	LOC101900711	0.702288
XM_020038188	Lmx1a	0.148439	2.03446	D	LOC101890442	0.702288
XM_020037795	primo-2	0.253621	2.03442	E	LOC101890954	0.702288
XM_005186375	Stip1	0.147606	2.03381	B	LOC101899370	0.702288
XM_011296544	fd3F	-0.240284	-2.0336	A	LOC101890855	0.702288
XM_020038400	Tim9b	-0.569677	-2.0332	E	LOC101887756	0.702288
XM_005189320	asun	0.900875	2.03227	E	LOC101899763	0.702288
XM_020037764	mmd	0.172922	2.03224	NA	LOC101892976	0.702288
XM_005179687	Rrp40	-0.129403	-2.03176	B	LOC101894422	0.702288
XM_005188264	l(2)34Fc	0.400894	2.03174	B	LOC101890337	0.702288
XM_005191241	#N/A	-0.301998	-2.03144	NA	NA	0.702288
XM_020039518	WDY	0.154373	2.03103	B	LOC101890352	0.702288
XM_005186342	CG11885	-0.114687	-2.03066	B	LOC101893873	0.702288
XM_020039433	CG4546	0.468363	2.03026	E	LOC101899770	0.702288
XM_011296371	CG8093	-0.44313	-2.0302	D	LOC101897770	0.702288
XM_005188053	CG3091	0.480288	2.03003	A	LOC101899142	0.702288
XM_005181172	Jafrac2	-0.532726	-2.02971	D	LOC101895601	0.702288
XM_005175349	ND-42	0.169853	2.02954	E	LOC101900636	0.702288
XM_011296274	nvy	0.185937	2.02947	NA	LOC101887757	0.702288
XM_011298101	CG3961	-0.747716	-2.02844	D	LOC101889909	0.70275
XM_005182456	ArfGAP3	0.153666	2.02843	D	LOC101893805	0.70275
XM_020035961	CG31064	0.456608	2.02801	E	LOC101887448	0.70284
XM_005178191	CG13404	0.125096	2.02763	A	LOC101895880	0.702878
XM_020035345	shep	-0.237051	-2.02634	NA	LOC101892253	0.704181
XM_020039330	capu	0.15915	2.02329	B	LOC101895687	0.707438
XR_002194611	CG33514	-0.315774	-2.02253	NA	NA	0.707438
XM_020038072	CG12883	-0.167234	-2.02246	E	LOC101899193	0.707438
XM_020038949	CG34408	-0.205863	-2.02211	NA	LOC109613801	0.707438
XM_005175877	Prx3	-0.138945	-2.02198	E	LOC101892258	0.707438
XM_005182133	Pdrg1	-0.139636	-2.02159	C	LOC101898139	0.707438
XM_005180002	thoc7	0.154294	2.02135	E	LOC101890417	0.707438
XM_005176839	#N/A	-0.250576	-2.02119	NA	NA	0.707438
XM_005181482	CG7744	0.303214	2.02035	A	LOC101889001	0.708123
XM_005185542	CG5938	-0.561055	-2.01977	E	LOC101898148	0.708436
XM_011297952	CG43367	-0.496248	-2.01851	D	LOC101896440	0.709281
XM_020039237	koi	-0.770877	-2.01717	C	LOC101899442	0.709281
XM_005176099	Idgf6	1.09404	2.01703	A	LOC101900298	0.709281
XM_005183861	Sdhaf3	-0.139311	-2.01684	E	LOC101899415	0.709281
XM_005182107	CG34351	-0.157728	-2.01646	B	LOC101893308	0.709281
XM_020037213	Dop1R1	-0.270781	-2.01631	NA	LOC109612809	0.709281
XM_020035381	CG32549	0.851088	2.01576	A	LOC101893244	0.709281
XM_005176106	r	0.211604	2.0157	A	LOC101901505	0.709281
XM_005187827	Arp2	0.284643	2.01549	A	LOC101890958	0.709281
XM_005175263	CG5953	-0.274283	-2.01541	B	LOC101899727	0.709281
XM_005177262	Atg8a	0.163341	2.01516	A	LOC101899569	0.709281
XM_005180580	Indy	0.207354	2.01451	D	LOC101897623	0.709281
XM_005187308	Surf4	0.146479	2.01405	NA	LOC101888086	0.709281
XM_005180971	CG12118	0.190789	2.01328	A	LOC101889177	0.709281
XR_002194521	#N/A	-0.224548	-2.013	NA	NA	0.709281
XM_020035784	CG14695	-0.261161	-2.01292	NA	LOC109612081	0.709281
XM_005175197	CG33932	0.151636	2.01241	A	LOC101887264	0.709281
XM_005183967	IA-2	-0.294238	-2.01173	B	LOC101888655	0.709281
XM_011293673	Unc-89	-0.326059	-2.0117	C	LOC101895658	0.709281
XM_005185267	Tob	-0.26937	-2.01169	A	LOC101894598	0.709281
XM_020037481	RhoGAP16F	0.223042	2.01167	A	LOC101890546	0.709281
XM_005189366	#N/A	-0.196198	-2.01102	NA	NA	0.709281
XM_005177070	CG13532	0.322207	2.01058	C	LOC101897668	0.709281
XM_005177086	Ugt317A1	0.127812	2.01052	C	LOC101900184	0.709281
XM_011294480	Ect3	0.235941	2.01047	NA	LOC105261849	0.709281
XM_005179122	Tep2	-0.657602	-2.0096	B	LOC101889853	0.710011
XR_891576	#N/A	-0.303092	-2.0092	NA	NA	0.710038
XM_020039812	#N/A	0.245262	2.00889	NA	NA	0.710038
XM_020037767	zip	-0.163211	-2.00842	NA	LOC109613195	0.710218
XM_020035736	#N/A	-0.397519	-2.00733	NA	NA	0.710443
XM_011297345	Sin3A	-0.861207	-2.0072	C	LOC101889781	0.710443
XM_020035872	Myo10A	-0.227984	-2.00701	NA	LOC101887991	0.710443
XM_005182819	stumps	-0.648949	-2.00659	E	LOC101895140	0.710443
XM_005186170	CG4409	0.735729	2.00637	NA	LOC101893933	0.710443
XM_020035080	Dhit	0.454473	2.0062	C	LOC101890689	0.710443
XM_005182583	CG42713	-0.287569	-2.0049	D	LOC101900601	0.711358
XM_005188977	CG11788	-0.299212	-2.00486	C	LOC101895272	0.711358
XM_020039978	#N/A	0.474498	2.0043	NA	NA	0.71166
XR_002195233	Dcr-2	0.18146	2.00258	NA	NA	0.71319
XM_005189136	CG4467	-0.168122	-2.00252	NA	LOC101893827	0.71319
XM_020039157	Smyd4-2	0.630428	2.00193	NA	LOC105262305	0.713534
XR_002194131	clos	-0.214653	-2.00127	NA	NA	0.713983
XM_005178973	Mad1	-0.138623	-2.00047	C	LOC101895186	0.714622
XR_002195593	Cyp4ae1	0.595917	2.00003	NA	NA	0.714754
XM_005176812	NaPi-T	0.202603	1.99969	C	LOC101900465	0.714762
XM_011293221	Nuak1	0.189877	1.99821	E	LOC101900194	0.7155
XM_011293764	Ten-m	-0.320747	-1.99817	D	LOC101887453	0.7155
XM_020035751	Aasdh	-0.641725	-1.99738	B	LOC101896513	0.7155
XM_005185509	su(Hw)	-0.10642	-1.99722	A	LOC101892801	0.7155
XM_005180221	#N/A	0.498348	1.99721	NA	NA	0.7155
XM_005177222	CG3655	-0.480733	-1.99712	A	LOC101893403	0.7155
XR_002195434	CG12065	0.316525	1.99626	NA	NA	0.71555
XM_005174908	Gycalpha99B	-0.561006	-1.99623	NA	LOC101892131	0.71555
XM_011292592	CG32549	0.384011	1.99606	A	LOC101893244	0.71555
XM_011296250	CG10623	-0.318222	-1.99545	D	LOC101892870	0.715927
XM_020038659	CG14223	0.153891	1.99511	A	LOC101888843	0.715929
XM_005185817	CG42727	0.229133	1.99462	E	LOC101889487	0.716124
XR_002195591	Art7	0.112606	1.99429	NA	NA	0.716124
XM_005178895	Tsen34	-0.196004	-1.99343	D	LOC101896213	0.716477
XM_005174720	PTP-ER	-0.968595	-1.99337	C	LOC101889449	0.716477
XM_011295551	jp	-0.407028	-1.99101	B	LOC101892400	0.716917
XM_005175760	CG11069	0.145186	1.99073	E	LOC101899158	0.716917
XM_020037403	beta4GalNAcTB	-0.533101	-1.98958	E	LOC101900096	0.716917
XM_005175228	CDK2AP1	0.139266	1.98852	NA	LOC101893620	0.716917
XM_005191205	Cp1	-0.164484	-1.98841	C	LOC101891431	0.716917
XR_002194431	#N/A	-0.350499	-1.98789	NA	NA	0.716917
XR_225708	clumsy	0.250962	1.98784	NA	NA	0.716917
XM_011294917	Obp56h	-0.675646	-1.98691	NA	LOC105261914	0.716917
XM_020036117	sowah	-0.804725	-1.9866	D	LOC101888881	0.716917
XM_005177075	asrij	-0.162536	-1.98652	C	LOC101898465	0.716917
XM_005176416	hoe2	0.211386	1.98609	B	LOC101893566	0.716917
XM_005183277	wap	0.178979	1.98591	A	LOC101898662	0.716917
XM_011297523	raskol	-0.201342	-1.98531	A	LOC101887870	0.716917
XM_011294313	Wnt5	-0.388832	-1.98495	C	LOC101892275	0.716917
XM_005181467	Arc1	-0.600486	-1.9844	D	LOC101900721	0.716917
XM_005180198	cpa	0.104197	1.98407	C	LOC101893854	0.716917
XM_005180902	CG8545	0.212216	1.98381	C	LOC101892269	0.716917
XM_005190585	PPO1	0.423092	1.98364	NA	LOC101897658	0.716917
XR_002194634	Gr66a	-0.190374	-1.98363	NA	NA	0.716917
XM_005176199	CG6766	0.140243	1.98357	B	LOC101887549	0.716917
XM_011294682	Sugb	-0.293543	-1.98327	D	LOC101898172	0.716917
XM_020036182	TM4SF	-0.932186	-1.98314	C	LOC101898015	0.716917
XM_020038806	sni	0.139154	1.98295	NA	LOC101896187	0.716917
XM_005189555	mthl10	-0.579076	-1.98253	NA	LOC101899086	0.716917
XM_005187650	Updo	0.251032	1.98247	C	LOC101890106	0.716917
XM_005184616	Usp47	-0.90021	-1.98194	D	LOC101896824	0.716917
XM_005182595	Pex2	-0.145049	-1.98189	D	LOC101887960	0.716917
XM_005175495	CG3857	-0.115767	-1.98168	A	LOC101898922	0.716917
XM_011291851	#N/A	0.590497	1.98167	NA	NA	0.716917
XM_005187192	CG31729	-0.219981	-1.98143	B	LOC101897764	0.716917
XM_005176204	#N/A	0.445303	1.98078	NA	NA	0.716917
XM_011297423	CG3191	-0.146089	-1.98076	NA	LOC101889503	0.716917
XM_020038391	Not3	-0.543861	-1.98061	C	LOC101900866	0.716917
XM_005187747	Nop56	0.126574	1.98057	E	LOC101891775	0.716917
XM_020036005	#N/A	-0.322107	-1.98025	NA	NA	0.716917
XM_005188990	mtgo	-0.189692	-1.98002	NA	LOC101897651	0.716917
XM_005189456	Obp19b	-0.34323	-1.97979	NA	LOC101894232	0.716917
XM_005184134	CG7275	-0.113685	-1.9792	A	LOC101901588	0.716917
XM_020035675	boi	-0.206224	-1.97902	A	LOC101892609	0.716917
XM_005182292	Mvd	0.165476	1.97854	NA	LOC101896168	0.716917
XM_005176801	Psf1	-0.153891	-1.97825	A	LOC101898758	0.716917
XM_020038296	Baldspot	-0.177178	-1.97824	D	LOC101887413	0.716917
XM_005189839	CG17698	0.103475	1.97795	D	LOC101893104	0.716917
XM_020035496	nudE	-0.70889	-1.97793	D	LOC101893131	0.716917
XM_011297671	Gfrl	-0.219794	-1.9778	NA	LOC105262498	0.716917
XM_020035306	pio	0.912907	1.97752	C	LOC101893299	0.716917
XM_005180422	CG4645	0.101203	1.97737	A	LOC101887222	0.716917
XM_005191513	B9d1	-0.215087	-1.97682	A	LOC101900407	0.717219
XM_005182956	CLIP-190	0.229956	1.97527	B	LOC101888705	0.718937
XM_020037438	CG7646	-0.252834	-1.9747	NA	LOC101889337	0.71927
XM_005182468	rho-6	0.181076	1.97405	B	LOC101895834	0.719725
XM_011296236	pyd	-0.36135	-1.97342	E	LOC101889943	0.719978
XM_005181187	CG34208	0.298988	1.97321	C	LOC101898013	0.719978
XR_002194823	#N/A	-0.169688	-1.97207	NA	NA	0.721119
XM_020038528	PIP82	-0.321663	-1.97065	NA	LOC105262139	0.721262
XM_011293889	drongo	-0.20153	-1.97018	B	LOC101891816	0.721262
XM_020037075	CG6686	-0.389737	-1.97016	NA	LOC101899481	0.721262
XM_005179821	CG3652	0.117128	1.97001	B	LOC101888876	0.721262
XM_020035269	Tep3	0.204824	1.96954	B	LOC101889402	0.721262
XR_002195566	#N/A	0.28133	1.96902	NA	NA	0.721262
XM_011292686	ppk5	-0.295997	-1.96881	NA	LOC105261580	0.721262
XM_005190198	Kal1	0.160936	1.96877	E	LOC101899440	0.721262
XM_005180967	Usp2	-0.151613	-1.96844	A	LOC101888124	0.721262
XM_020035999	sano	0.275678	1.9683	C	LOC101898254	0.721262
XR_002194791	CG4161	-0.157483	-1.96778	NA	NA	0.721262
XM_020036861	CG42404	-0.140701	-1.96763	NA	LOC109612658	0.721262
XM_011295457	RN-tre	0.146457	1.96754	C	LOC101891127	0.721262
XM_011298211	Src42A	0.182608	1.9672	NA	LOC101891623	0.721262
XM_020038977	C901	-0.240306	-1.96672	NA	LOC101892012	0.721262
XM_020036302	milt	0.937256	1.96655	B	LOC101890570	0.721262
XM_005180682	Epg5	-0.72923	-1.96625	E	LOC101900484	0.721262
XM_020035341	CG44085	-0.315855	-1.96602	A	LOC101893517	0.721262
XM_011295752	Rox8	0.163109	1.96545	E	LOC101895264	0.721262
XM_005185139	CG2794	-0.265569	-1.96523	NA	LOC101900038	0.721262
XR_002194846	#N/A	-0.213077	-1.96512	NA	NA	0.721262
XM_011295523	rictor	-0.763176	-1.96412	A	LOC101892176	0.72178
XM_005187448	CG16799	0.23199	1.96387	C	LOC101899548	0.72178
XM_020037166	Ir7c	-0.160458	-1.96378	NA	LOC109612794	0.72178
XM_005190358	CG9919	0.166294	1.96321	A	LOC101901655	0.722126
XM_005178930	#N/A	0.294344	1.96248	NA	NA	0.722698
XM_020034669	stau	0.343646	1.96174	B	LOC101899458	0.72328
XM_020036043	mdy	-0.196356	-1.96086	B	LOC101894841	0.724061
XM_005188799	CG11149	0.439205	1.95959	B	LOC101893099	0.725397
XM_020036994	CkIIbeta	0.171533	1.95822	A	LOC101901257	0.726869
XM_005178974	Cog6	-0.170859	-1.95769	C	LOC101895358	0.727164
XR_002195480	#N/A	-0.139118	-1.9567	NA	NA	0.728104
XM_005182755	CG15478	-0.246714	-1.95636	A	LOC101899802	0.728138
XM_020038761	Trh	0.411349	1.95592	D	LOC101893101	0.728192
XM_005190855	bgcn	-0.19251	-1.95567	C	LOC101901721	0.728192
XM_005188223	Pdp1	-0.327301	-1.95485	D	LOC101898335	0.728502
XM_011296648	jus	-0.258231	-1.95449	E	LOC101892199	0.728502
XM_005179100	Pld3	-0.530552	-1.95445	B	LOC101900598	0.728502
XM_011297207	Eip63E	-0.330265	-1.95417	NA	LOC101891844	0.728502
XM_020034999	CG43795	-0.345853	-1.95247	NA	LOC109611767	0.729797
XM_005183977	pie	0.461942	1.95233	A	LOC101889303	0.729797
XM_020037467	Gug	-0.537673	-1.95229	D	LOC101889247	0.729797
XM_011292467	CG15642	0.618508	1.95054	NA	LOC105261537	0.731154
XR_002195016	CG15706	0.183738	1.95022	NA	NA	0.731154
XM_005175044	Mad	0.702516	1.95003	B	LOC101888104	0.731154
XM_020037103	Hrd3	0.902532	1.94995	E	LOC101892564	0.731154
XM_020037461	Gug	0.577298	1.94914	D	LOC101889247	0.731154
XM_005184001	CG8289	-0.405549	-1.94856	A	LOC101894547	0.731154
XM_005181530	Usp14	0.104787	1.94805	B	LOC101897220	0.731154
XM_005186638	mag	0.221796	1.94731	A	LOC101890607	0.731154
XM_005179078	CG31106	-0.594371	-1.9469	A	LOC101896917	0.731154
XM_011291977	Lar	-0.249377	-1.94683	B	LOC101901057	0.731154
XM_020035295	CG43078	-0.663077	-1.94675	D	LOC101889345	0.731154
XM_005176047	jus	0.275627	1.94665	E	LOC101892199	0.731154
XM_020039841	Sik3	0.788089	1.94619	C	LOC101900590	0.731154
XM_011295606	up	-0.252688	-1.94577	A	LOC101894605	0.731154
XR_891514	CG6753	-0.233399	-1.94562	NA	NA	0.731154
XM_005185851	Pdp	0.114879	1.9456	A	LOC101896125	0.731154
XM_011295512	CG13937	0.426876	1.94504	NA	LOC101897001	0.731154
XM_005177427	scyl	-0.207713	-1.94486	NA	LOC101895996	0.731154
XM_020035226	Spn	0.454817	1.94476	D	LOC101898473	0.731154
XM_005182884	FipoQ	0.345101	1.94415	E	LOC101891288	0.731154
XM_011296438	Ns4	0.146735	1.94373	B	LOC101899146	0.731154
XM_005187186	CG13605	-0.292748	-1.94365	E	LOC101896592	0.731154
XM_020034746	CadN2	-0.307271	-1.94345	NA	LOC101889288	0.731154
XR_891411	#N/A	-0.26572	-1.94323	NA	NA	0.731154
XM_020039680	fs(1)Ya	0.668953	1.94308	A	LOC101887605	0.731154
XM_011296400	fs(1)K10	1.26724	1.94305	A	LOC101887594	0.731154
XM_020036806	psq	-0.335398	-1.94263	C	LOC101900151	0.731302
XM_005177415	JhI-26	0.193926	1.94208	C	LOC101894017	0.731352
XM_005190401	Rb97D	0.268368	1.94144	NA	LOC101895001	0.731352
XM_005183083	CG1236	-0.222974	-1.94102	E	LOC101893984	0.731352
XM_020036712	CG6908	-0.206426	-1.94096	E	LOC101895604	0.731352
XM_005187975	CG5768	0.235664	1.94052	E	LOC101901209	0.731352
XM_005179457	CG3609	-0.852955	-1.94003	B	LOC101900891	0.731352
XM_005177735	CG14130	-0.119207	-1.93985	A	LOC101890473	0.731352
XM_011296745	#N/A	-0.152333	-1.93964	NA	NA	0.731352
XM_005179513	Tsf1	0.16714	1.93908	A	LOC101895070	0.731352
XM_005187109	CG12204	-0.270608	-1.93891	A	LOC101898155	0.731352
XM_011293207	Nepl21	-0.29107	-1.93875	E	LOC101891869	0.731352
XM_020038152	Galphas	-0.617989	-1.93875	C	LOC101899076	0.731352
XM_005189611	Piezo	-0.222015	-1.93849	NA	LOC101894350	0.731352
XM_005176433	Chi	-0.744522	-1.93791	C	LOC101896151	0.731417
XM_005178858	Past1	0.159301	1.93782	E	LOC101889798	0.731417
XM_020040157	CG2909	0.132881	1.93726	A	LOC101898587	0.73148
XM_011295945	CG32638	0.127772	1.93701	NA	LOC105262095	0.73148
XM_011292793	Ack-like	-0.130352	-1.93683	C	LOC101896388	0.73148
XM_011294465	CG11655	0.38165	1.9362	A	LOC101894548	0.731737
XM_005181694	CG5162	0.303858	1.93603	A	LOC101895544	0.731737
XM_011292158	Lk	-0.288093	-1.93565	D	LOC101894080	0.731755
XM_011297725	unc80	-0.22808	-1.93514	NA	LOC101899092	0.731755
XM_020036292	mim	0.42767	1.93485	C	LOC101889582	0.731755
XM_005190426	Epac	0.449878	1.93462	C	LOC101899941	0.731755
XM_005179673	htt	-0.124482	-1.93445	E	LOC101891972	0.731755
XM_005177206	NijB	0.142709	1.934	D	LOC101889397	0.731947
XM_005174872	Klp10A	-0.223952	-1.93265	A	LOC101900294	0.732301
XM_020037519	Tep2	0.336107	1.93214	NA	LOC101895381	0.732301
XM_020038760	CG13912	0.253373	1.93178	NA	LOC105261448	0.732301
XM_005175893	dac	0.394963	1.93114	B	LOC101894733	0.732301
XM_020038262	CG11714	0.648269	1.93108	NA	LOC109613447	0.732301
XM_005177183	Toll-9	-0.156958	-1.93063	D	LOC101900185	0.732301
XM_005179897	CG7099	-0.331712	-1.93011	E	LOC101901683	0.732301
XM_005188706	Obp56a	-0.386462	-1.93009	NA	LOC101890852	0.732301
XR_002194449	CG15399	-0.422743	-1.93006	NA	NA	0.732301
XM_020036786	LSm1	0.154706	1.9299	C	LOC101901665	0.732301
XM_005181281	stas	-0.144161	-1.92954	A	LOC101898312	0.732301
XR_891551	clos	-0.194536	-1.92953	NA	NA	0.732301
XM_011294182	Pten	0.757727	1.92949	B	LOC101892103	0.732301
XM_011296212	CG13921	0.12904	1.9294	D	LOC101897768	0.732301
XM_005187500	CG3645	-0.123033	-1.92897	D	LOC101893318	0.732327
XM_005183939	CG30016	0.151502	1.92877	A	LOC101898496	0.732327
XM_020038820	CG14352	-0.12405	-1.92815	B	LOC101890110	0.732755
XM_011297022	#N/A	0.573613	1.92614	NA	NA	0.735128
XM_005191584	CG11044	-0.225678	-1.92586	C	LOC101899723	0.735128
XM_005179039	CG13833	-0.369365	-1.92519	C	LOC101890993	0.735636
XM_005182526	TTLL3A	-0.136361	-1.92488	B	LOC101890940	0.735645
XM_005176725	ND-ACP	0.120737	1.92454	D	LOC101900705	0.735685
XM_005187914	obe	-0.126339	-1.92187	E	LOC101890848	0.739026
XM_005175206	elfless	0.497455	1.92124	NA	LOC101888862	0.739026
XM_011296036	ASPP	0.264442	1.92122	C	LOC101891715	0.739026
XM_005177369	AkhR	0.604606	1.92096	B	LOC101901292	0.739026
XM_005186896	PyK	-0.129792	-1.92044	B	LOC101889708	0.739325
XM_011294723	CG10137	-0.139789	-1.92006	B	LOC101899509	0.739424
XM_011292015	Shab	0.553449	1.91969	D	LOC101900306	0.739513
XM_011296309	CG13742	-0.185249	-1.91934	C	LOC101887525	0.739573
XM_011293715	#N/A	-0.32727	-1.91767	NA	NA	0.741527
XM_020034640	RyR	0.537925	1.91723	C	LOC101888405	0.741711
XR_002194287	CG14401	-0.236771	-1.91685	NA	NA	0.741813
XM_020038430	bon	0.817279	1.91604	E	LOC101901211	0.742538
XM_011297230	CG30197	-0.244812	-1.91537	D	LOC101899036	0.743059
XM_011295357	CG31663	0.213005	1.91446	B	LOC101900156	0.743921
XM_005177650	ari-2	0.124899	1.914	C	LOC101890021	0.744136
XM_005189903	Nepl13	0.214768	1.91311	NA	LOC101890112	0.744547
XM_020039718	CG32694	0.243736	1.91265	NA	LOC101900632	0.744547
XM_005192117	CG10348	-0.202827	-1.91188	B	LOC101898917	0.744547
XM_020038233	CG34408	-0.500625	-1.91132	B	LOC101897424	0.744547
XM_005181675	Syx4	-0.38186	-1.91108	A	LOC101892440	0.744547
XM_011296470	CG9008	0.892118	1.91097	B	LOC101896598	0.744547
XM_005177029	ATPCL	0.376123	1.91057	C	LOC101891858	0.744547
XR_002194691	Cog2	-0.207862	-1.91038	NA	NA	0.744547
XM_011297634	CG3919	-0.139967	-1.91017	NA	LOC105262487	0.744547
XM_005179483	CG30015	-0.228356	-1.90976	C	LOC101890135	0.744547
XM_005179343	Hsp60A	0.148103	1.90958	A	LOC101896810	0.744547
XM_005179580	tws	-0.787524	-1.9093	E	LOC101891046	0.744547
XM_005182487	Rpt5	0.232841	1.90927	E	LOC101899007	0.744547
XM_020038347	#N/A	-0.201041	-1.90864	NA	NA	0.744547
XM_011293633	mam	-0.324003	-1.90842	NA	LOC101889302	0.744547
XM_005191042	Torsin	-0.115195	-1.90836	A	LOC101892297	0.744547
XM_005186889	CG8475	-0.690788	-1.90824	B	LOC101888316	0.744547
XM_005186306	CG11030	-0.159701	-1.90822	B	LOC101888019	0.744547
XM_011293357	Lapsyn	0.125874	1.9066	C	LOC101896283	0.746173
XM_020039610	Mhc	-0.536978	-1.90648	B	LOC101893508	0.746173
NM_001286878	cathD	-1.49498	-1.90609	C	LOC101894200	0.746296
XM_005185809	CG8043	-0.16844	-1.90474	E	LOC101888081	0.747741
XM_020036490	CG31100	-0.584791	-1.90439	E	LOC101896172	0.747741
XM_005187538	stw	0.197946	1.90413	C	LOC101900441	0.747741
XM_005178931	nAChRalpha3	-0.185727	-1.90387	A	LOC101888242	0.747741
XM_005175852	Cyp6a17	-0.584769	-1.90298	B	LOC101887482	0.748582
XM_011295302	CG4615	0.328199	1.90144	A	LOC101889648	0.749425
XR_002195592	Cyp4ae1	0.591648	1.90128	NA	NA	0.749425
XM_020037594	yem	0.389384	1.9012	E	LOC101887406	0.749425
XM_005183813	Sos	-0.441973	-1.90119	NA	LOC101891404	0.749425
XM_005191955	Meltrin	0.130754	1.90078	NA	LOC101897884	0.749579
XM_020039705	spn-F	-0.235051	-1.89967	NA	LOC109614286	0.750436
XM_020037348	PNUTS	-0.497142	-1.89952	B	LOC101895490	0.750436
XM_005177145	CG7945	-0.587798	-1.89922	D	LOC101893626	0.750436
XM_020035763	CG30281	-0.20884	-1.89889	C	LOC101898821	0.750436
XM_011293727	#N/A	-0.285228	-1.89867	NA	NA	0.750436
XM_005179751	IFT52	-0.222541	-1.89765	NA	LOC101890306	0.751274
XM_005180924	KaiR1D	-0.956504	-1.89749	E	LOC101896060	0.751274
XM_005187381	CG30105	-0.163274	-1.89698	C	LOC101901815	0.751357
XM_020035206	hbn	-0.136298	-1.89683	C	LOC101896053	0.751357
XM_020035271	Ets98B	-0.17787	-1.89653	E	LOC101888454	0.751359
XM_020034922	#N/A	0.224038	1.89619	NA	NA	0.751412
XM_011292515	Rift	-0.635265	-1.89563	E	LOC101901351	0.75154
XM_020036604	Arfrp1	-0.314216	-1.89438	A	LOC101900964	0.75154
XM_005180466	Ugt316A1	-0.191659	-1.8943	D	LOC101893798	0.75154
XM_020039171	CG31140	-0.187029	-1.89427	NA	LOC109613984	0.75154
XM_020035885	CG6654	0.148044	1.89425	E	LOC101887622	0.75154
XM_005191083	pum	-0.251353	-1.89381	NA	LOC101899607	0.75154
XM_005180613	CG17027	-0.137253	-1.89301	D	LOC101888297	0.75154
XM_005178797	Pcf11	-0.997769	-1.89293	C	LOC101893573	0.75154
XM_011292320	Dyb	0.167517	1.89289	C	LOC101891627	0.75154
XM_020040146	Agpat1	0.715277	1.89263	A	LOC101887489	0.75154
XM_005177623	Damm	0.104324	1.89261	NA	LOC101899570	0.75154
XM_020039527	Slmap	-0.42892	-1.89243	B	LOC101893169	0.75154
XM_005180423	Cyp311a1	-0.285836	-1.89221	A	LOC101887394	0.75154
XM_005181029	Tm1	0.480065	1.8918	E	LOC101898358	0.751697
XM_011297066	sosie	-0.143406	-1.89073	E	LOC101890453	0.752408
XM_020038903	CG46319	-0.322463	-1.89071	NA	LOC109613760	0.752408
XM_011297154	#N/A	0.742793	1.88994	NA	NA	0.753098
XM_005186882	AgmNAT	-0.338572	-1.88887	A	LOC101901764	0.753805
XM_005189684	CG9586	-0.107626	-1.88867	B	LOC101894942	0.753805
XM_011292490	nompA	0.593306	1.88839	C	LOC101894580	0.753805
XM_020038911	CoRest	-0.568283	-1.88826	A	LOC101901107	0.753805
XM_005180418	AANATL7	0.137146	1.88657	A	LOC101901185	0.754915
XM_005192157	CG4025	0.290599	1.88655	NA	LOC101891433	0.754915
XM_005184334	Cyp6a9	-0.178688	-1.8862	NA	LOC101890041	0.754915
XM_020036652	CG7824	0.27398	1.88612	NA	LOC109612520	0.754915
XM_005185538	Pkc98E	-0.274401	-1.886	E	LOC101897861	0.754915
XM_005184958	E(spl)m5-HLH	-0.12957	-1.88535	E	LOC101898957	0.754962
XM_005182514	Tim23	0.275992	1.8851	B	LOC101888944	0.754962
XM_011292374	CG42360	0.740687	1.8836	C	LOC101901336	0.754962
XM_020038300	Pp2B-14D	-0.258423	-1.88309	A	LOC101890783	0.754962
XM_005183875	GluClalpha	-0.703456	-1.88238	NA	LOC101887288	0.754962
XM_011296859	Hipk	0.609734	1.88196	D	LOC101891841	0.754962
XM_011294751	CG9095	-0.385768	-1.88189	NA	LOC101893869	0.754962
XM_011294794	eIF3k	-0.341755	-1.88175	B	LOC101898088	0.754962
XM_011296041	retn	-0.129479	-1.8817	C	LOC101894668	0.754962
XM_020037295	CG7208	-0.165989	-1.88157	NA	LOC109612854	0.754962
XM_005185396	Ate1	0.157192	1.88119	C	LOC101901427	0.754962
XM_005186493	pcs	0.103167	1.88061	C	LOC101892055	0.754962
XM_020039601	jagn	0.318188	1.88051	E	LOC101892877	0.754962
XM_005179877	IntS11	-0.113791	-1.88032	E	LOC101898423	0.754962
XM_011293370	Nelf-A	0.151755	1.87888	E	LOC101893975	0.754962
XM_020035600	CG15020	-0.14619	-1.87885	D	LOC101895827	0.754962
XM_020039014	Ugt35B1	0.493299	1.87798	NA	LOC101889089	0.754962
XM_005175730	Pfrx	0.19909	1.87757	A	LOC101893622	0.754962
XM_011296662	PyK	0.097235	1.87729	NA	LOC101892944	0.754962
XM_005187259	retm	-0.202895	-1.87724	B	LOC101894395	0.754962
XM_005176867	HIPP1	0.119577	1.87717	D	LOC101895349	0.754962
XM_005174890	Lcp65Ac	0.20576	1.87697	NA	LOC101888919	0.754962
XM_020038644	east	-0.721863	-1.87679	A	LOC101893881	0.754962
XM_020038784	CG7530	0.197209	1.87585	E	LOC101891546	0.754962
XM_005187164	CG7339	-0.154527	-1.8757	D	LOC101892740	0.754962
XM_011295486	sw	-0.370864	-1.87563	A	LOC101888373	0.754962
XM_005175272	Mnt	-0.271302	-1.87562	NA	LOC101901288	0.754962
XM_005190224	Tsp66E	-0.129257	-1.87561	NA	LOC101890857	0.754962
XM_005179754	TH1	0.101087	1.87529	A	LOC101891170	0.754962
XM_005187464	LanB1	0.244101	1.87525	B	LOC101887411	0.754962
XM_005187254	St4	-0.176857	-1.87491	C	LOC101893543	0.754962
XM_005189933	Gr21a	-0.38819	-1.87476	B	LOC101895162	0.754962
XM_011292088	upd1	0.207583	1.87464	A	LOC101887889	0.754962
XM_005191794	CG8032	-0.17193	-1.87461	E	LOC101897491	0.754962
XM_020036031	insb	-0.247935	-1.87432	A	LOC101891399	0.754962
XM_005178027	HDAC3	-0.107275	-1.87421	E	LOC101897559	0.754962
XM_005185065	CalpB	0.178904	1.87383	C	LOC101887849	0.754962
XM_020039614	CG1561	0.382406	1.8734	A	LOC101898110	0.754962
XM_011296888	CG15728	-0.37523	-1.87306	A	LOC101890792	0.754962
XM_011294901	Ugt35B1	-0.190605	-1.87293	C	LOC101898832	0.754962
XM_005188652	kkv	0.311274	1.87292	E	LOC101895796	0.754962
XM_011296440	CG7265	-0.3018	-1.87271	NA	LOC105262168	0.754962
XM_011296700	CG14258	0.173049	1.87264	NA	LOC101901603	0.754962
XM_005185634	dpr20	-0.24698	-1.87245	NA	LOC101899484	0.754962
XR_002194698	#N/A	-0.217255	-1.87234	NA	NA	0.754962
XM_005185917	Optix	0.126113	1.87163	C	LOC101894338	0.754962
XM_005187606	CG3702	0.085622	1.87102	B	LOC101897245	0.754962
XM_011295466	tfc	0.325606	1.87091	B	LOC101898728	0.754962
XM_005189422	CG15892	-0.123211	-1.87091	A	LOC101887359	0.754962
XR_002194756	#N/A	0.396971	1.87085	NA	NA	0.754962
XM_005191144	Naam	-0.357892	-1.87073	NA	LOC101896258	0.754962
XM_011297615	Spc105R	-0.13751	-1.8696	NA	LOC105262477	0.754962
XM_020038366	kuk	-0.373415	-1.86923	E	LOC101889319	0.754962
XM_005186012	Drip	0.207564	1.86908	NA	LOC101895611	0.754962
XR_891520	#N/A	-0.290593	-1.86907	NA	NA	0.754962
XM_005187783	CG12817	-0.131807	-1.86902	E	LOC101898158	0.754962
XM_005189987	zetaCOP	0.141583	1.86868	D	LOC101890168	0.754962
XM_005184039	Sirt6	0.121438	1.86841	A	LOC101900605	0.754962
XR_225718	CG11670	-0.314994	-1.86839	NA	NA	0.754962
XM_005176287	Rab21	-0.219342	-1.8682	A	LOC101901342	0.754962
XM_020040081	CG8547	-0.830669	-1.86768	C	LOC101895351	0.754962
XM_005177148	CG32447	0.341351	1.86715	D	LOC101894527	0.754962
XM_005181012	Tm2	0.425584	1.86712	E	LOC101897741	0.754962
XM_005190996	GstT1	-0.29278	-1.86712	NA	LOC101898455	0.754962
XM_005178737	Mip	-0.33859	-1.867	D	LOC101898471	0.754962
XM_005184000	ND-24	-0.120655	-1.86636	A	LOC101894382	0.755473
XM_011292118	Lnk	-0.560612	-1.86585	E	LOC101895531	0.755787
XM_005175781	Adar	-0.303052	-1.86447	NA	LOC101888568	0.755992
XM_020035964	Zip99C	-0.465305	-1.86417	E	LOC101901577	0.755992
XM_005188136	CG11000	-0.352039	-1.86406	E	LOC101898097	0.755992
XR_225602	Dtd	-0.17959	-1.86373	NA	NA	0.755992
XM_005186385	smo	-0.456338	-1.86372	B	LOC101901033	0.755992
XM_011296396	Nup54	0.310838	1.86351	C	LOC101895097	0.755992
XM_005189960	CG9240	-0.322464	-1.86322	A	LOC101899995	0.755992
XM_011294872	Syt1	-0.446598	-1.86313	B	LOC101899869	0.755992
XM_005188332	CG34445	0.147475	1.86286	C	LOC101901540	0.755992
XM_011293885	CG11961	0.317842	1.86285	C	LOC101889980	0.755992
XM_011297514	CG12065	0.245475	1.8623	NA	LOC105262450	0.756186
XM_011293744	CG8080	0.161579	1.86193	C	LOC101894592	0.756186
XR_002194818	Crk	0.14903	1.86182	NA	NA	0.756186
XM_005185881	timeout	-0.191739	-1.86141	E	LOC101888435	0.756186
XM_005187588	Rph	0.194172	1.86128	A	LOC101894446	0.756186
XM_011295011	#N/A	-0.240892	-1.85937	NA	NA	0.756682
XM_020037263	uex	0.73872	1.85909	C	LOC101901699	0.756682
XM_020037573	Ndf	0.106175	1.85893	NA	LOC109613010	0.756682
XM_005183396	Pten	-0.783659	-1.8587	B	LOC101892103	0.756682
XM_020037504	Sh3beta	-1.03731	-1.85863	D	LOC101892568	0.756682
XM_020036968	CG8132	0.286419	1.85862	B	LOC101899131	0.756682
XM_005186159	CG5715	-0.163057	-1.85841	E	LOC101892115	0.756682
XM_005178562	Cyt-c1	0.0886765	1.85807	D	LOC101899786	0.756682
XM_005187285	CG42367	0.140306	1.85797	B	LOC101898894	0.756682
XM_011295938	Cip4	-0.196458	-1.8579	NA	LOC101898157	0.756682
XM_005181295	euc	0.294729	1.85781	E	LOC101900543	0.756682
XM_005189248	rau	-0.210732	-1.85704	B	LOC101887648	0.757386
XM_005176603	#N/A	-0.180396	-1.85653	NA	NA	0.757473
XM_005176874	Rint1	-0.652611	-1.85641	D	LOC101896107	0.757473
XM_005175426	#N/A	-0.16764	-1.85605	NA	NA	0.757589
XR_002194524	#N/A	-0.172034	-1.85558	NA	NA	0.757854
XR_002195139	#N/A	-0.161182	-1.85451	NA	NA	0.758812
XM_011295145	CG10737	0.379223	1.85367	C	LOC101900611	0.758812
XR_002194336	#N/A	-0.114487	-1.85333	NA	NA	0.758812
XM_011297530	CG4577	-0.212525	-1.85314	NA	LOC105262456	0.758812
XM_011296707	#N/A	-0.153452	-1.85283	NA	NA	0.758812
XM_020035083	sff	-0.271635	-1.85264	D	LOC101891215	0.758812
XM_005190462	CG43673	-1.22453	-1.85188	NA	LOC101890794	0.758812
XM_011297034	Atet	-0.195504	-1.85145	B	LOC101897386	0.758812
XR_002195038	mRpL28	0.39033	1.85119	NA	NA	0.758812
XM_005191614	rswl	0.152975	1.85118	C	LOC101892194	0.758812
XM_011293229	Zdhhc8	-0.266308	-1.85083	NA	LOC101891806	0.758812
XM_005184431	CG12163	0.106434	1.85064	E	LOC101890771	0.758812
XM_005191547	Cip4	-0.140276	-1.85045	NA	LOC101892701	0.758812
XM_005192074	Cip4	-0.140276	-1.85045	NA	LOC101890398	0.758812
XR_891632	CG1316	-0.133422	-1.85029	NA	NA	0.758812
XM_005178290	CG14722	0.107689	1.85001	E	LOC101897789	0.758812
XM_020035185	CG5909	0.445905	1.85	E	LOC101889466	0.758812
XM_005177688	CG16974	0.19594	1.84963	C	LOC101896328	0.758812
XM_020039097	Tet	0.907695	1.84956	D	LOC101900516	0.758812
XM_005184240	fzr	-0.241382	-1.84868	A	LOC101888362	0.75889
XM_011295636	Cpr47Ef	0.423248	1.84862	NA	LOC101890720	0.75889
XM_005185963	CG11686	0.159131	1.8483	E	LOC101887465	0.75889
XM_005190555	Oseg2	-0.152981	-1.84813	D	LOC101892758	0.75889
XM_005185836	ATPsynD	-0.64385	-1.84811	E	LOC101893316	0.75889
XM_011297943	CG16959	0.224287	1.84718	D	LOC101892649	0.759458
XM_020034938	NaCP60E	0.66353	1.84675	C	LOC101889291	0.759458
XM_005190389	CG31832	0.230094	1.84657	NA	LOC101893167	0.759458
XM_011296471	CG9008	0.368068	1.84609	B	LOC101896598	0.759458
XM_005186835	Fim	0.168254	1.84539	A	LOC101893994	0.759458
XM_011297532	CG8675	-0.160049	-1.84502	A	LOC101891086	0.759458
XM_005177865	CG10062	0.417933	1.84476	C	LOC101899162	0.759458
XM_011292963	mod(mdg4)	0.16351	1.84455	E	LOC101896750	0.759458
XM_020039042	Tbc1d15-17	0.389991	1.84438	NA	LOC109613887	0.759458
XM_011296433	CG30428	-0.136513	-1.84433	NA	LOC105262166	0.759458
XM_005181938	brp	0.595576	1.84417	C	LOC101892489	0.759458
XM_011297487	CG14442	0.511993	1.84399	A	LOC101896551	0.759458
XM_020038105	Mekk1	0.191003	1.84385	E	LOC101888375	0.759458
XM_011292721	CG11456	0.573706	1.84351	D	LOC101896161	0.759458
XM_011297204	Eip63E	-0.40694	-1.84302	NA	LOC101891844	0.759458
XR_002194781	#N/A	-0.159838	-1.843	NA	NA	0.759458
XM_011292732	Actn	0.235874	1.84297	A	LOC101887563	0.759458
XM_011292812	CG34260	0.267475	1.84253	D	LOC101887221	0.759699
XM_005185061	Mtpbeta	0.204928	1.84215	C	LOC101887343	0.759786
XM_005186183	rut	-0.264832	-1.84163	NA	LOC101896080	0.759786
XM_011296008	CG14762	0.170144	1.84151	C	LOC101893159	0.759786
XM_005187832	CG4278	-0.135713	-1.84136	A	LOC101891776	0.759786
XM_020036955	RhoGEF2	0.278779	1.84091	C	LOC101890835	0.760033
XM_005190804	TMS1	0.266818	1.83957	D	LOC101891899	0.760762
XM_005179744	CG34183	0.138296	1.83949	B	LOC101889171	0.760762
XM_011292026	ClC-a	0.829659	1.83928	E	LOC101900472	0.760762
XM_011295038	SLO2	-0.544718	-1.83858	C	LOC101895809	0.760762
XM_020036718	Scgdelta	-0.203164	-1.83818	NA	LOC101896930	0.760762
XM_020036133	Pdf	-0.194524	-1.83805	NA	pdf	0.760762
XM_005185852	CG12155	0.689621	1.83789	A	LOC101896295	0.760762
XM_005184221	Sfxn1-3	-0.681777	-1.83759	E	LOC101900090	0.760762
XM_005177286	zyd	0.221674	1.83751	A	LOC101888627	0.760762
XM_020036250	slo	-0.2314	-1.83745	E	LOC101896394	0.760762
XM_011294217	faf	-0.4499	-1.83729	E	LOC101893926	0.760762
XM_005185557	CenB1A	0.255934	1.83709	E	LOC101900855	0.760762
XM_005175376	milt	-0.368967	-1.83651	B	LOC101890570	0.760818
XM_011294715	Usp5	0.0981355	1.8365	D	LOC101892279	0.760818
XM_011292510	CD98hc	0.150206	1.83579	E	LOC101899788	0.761144
NM_001287535	Sxl	0.131386	1.8353	NA	Sxl	0.761144
XM_005182637	muc	0.218094	1.83522	B	LOC101894593	0.761144
XM_005177288	CG17167	-0.297504	-1.83517	A	LOC101888926	0.761144
XM_005178607	CG18814	0.1549	1.83486	D	LOC101892141	0.761201
XM_011292441	Tep2	-0.201198	-1.83324	NA	LOC105261536	0.761686
XM_005187635	CG11382	-0.191937	-1.83312	A	LOC101887588	0.761686
XR_002195383	CG42699	-0.188765	-1.83299	NA	NA	0.761686
XM_005185492	CG2129	-0.105366	-1.83272	A	LOC101889589	0.761686
XM_005191586	CG8740	0.162502	1.83267	C	LOC101900061	0.761686
XM_005181967	fu	-0.754178	-1.83259	A	LOC101897342	0.761686
XM_020034818	CAP	-0.206883	-1.83203	C	LOC101892774	0.761686
XM_005187709	Scgalpha	-0.278961	-1.83203	B	LOC101899818	0.761686
XM_005191270	CG1537	-0.179262	-1.8318	A	LOC101887650	0.761686
XM_011293703	CG14613	-0.637192	-1.83169	A	LOC101893526	0.761686
XM_005186733	raw	0.370275	1.83151	B	LOC101890781	0.761686
XM_020036796	Rpn11	0.0912556	1.83123	B	LOC101895606	0.761686
XM_005188425	CG31523	0.283233	1.82986	E	LOC101901541	0.763278
XM_020039120	Gr93a	-0.13379	-1.82912	E	LOC101895408	0.763437
XM_020035419	dpr1	-0.567694	-1.8288	C	LOC101894838	0.763437
XM_005180942	CG5676	-0.207193	-1.82863	A	LOC101898998	0.763437
XM_011295125	CG7252	0.701388	1.82847	D	LOC101895259	0.763437
XM_005181747	dnt	-0.221643	-1.82838	B	LOC101890652	0.763437
XM_005190089	eIF4H1	0.412544	1.82805	A	LOC101892523	0.763522
XM_005191984	Chrac-14	-0.171299	-1.82767	NA	LOC101888159	0.763634
XM_011292670	Cdc23	0.301098	1.82743	B	LOC101897618	0.763634
XM_020036267	Mnt	-0.166986	-1.8257	NA	LOC109612301	0.764536
XM_005179972	Vha36-1	0.112454	1.82567	A	LOC101900018	0.764536
XR_002194019	#N/A	-0.223468	-1.8253	NA	NA	0.764536
XM_011292552	Alk	0.144515	1.82526	NA	LOC101894634	0.764536
XM_005188269	Dyrk2	-0.182521	-1.82498	B	LOC101891483	0.764536
XM_005181779	Pect	0.254305	1.82492	B	LOC101895775	0.764536
XM_005187955	CG43732	-0.297703	-1.82472	E	LOC101898034	0.764536
XM_005186263	Mal-A4	0.162724	1.82463	C	LOC101895212	0.764536
XM_020039026	Atac2	0.430252	1.82398	NA	LOC109613869	0.764913
XM_005185594	CG6664	0.118499	1.82363	D	LOC101891878	0.764913
XM_011295388	CG5235	-0.179327	-1.8235	NA	LOC101901370	0.764913
XM_020038815	#N/A	-0.47504	-1.82296	NA	NA	0.764913
XM_005190189	CG14937	-0.501547	-1.82269	NA	LOC101897533	0.764913
XM_011293492	CG7632	0.456193	1.82257	D	LOC101897804	0.764913
XM_020037147	Rbfox1	-0.30772	-1.82209	D	LOC101901314	0.764913
XM_020038425	CG11852	0.153608	1.82195	E	LOC101887975	0.764913
XM_020035017	#N/A	-0.320649	-1.82157	NA	NA	0.764913
XM_005175114	CG42361	0.131214	1.82109	C	LOC101901165	0.764913
XM_011293489	CG7632	0.706233	1.82104	D	LOC101897804	0.764913
XM_005188518	CG46338	0.132782	1.82062	C	LOC101888092	0.764913
XR_002195010	#N/A	-0.354467	-1.81994	NA	NA	0.764913
XM_011295934	Obp99c	0.577004	1.81987	E	LOC101896945	0.764913
XM_005188202	noi	-0.159786	-1.81959	E	LOC101894769	0.764913
XM_005183222	wus	-0.117444	-1.81957	A	LOC101889241	0.764913
XR_002194907	scb	-0.145764	-1.81952	NA	NA	0.764913
XR_002194407	CG10338	0.215491	1.8195	NA	NA	0.764913
XM_011297432	#N/A	-0.344182	-1.81913	NA	NA	0.76506
XM_005177559	HPS1	-0.168816	-1.81864	A	LOC101888808	0.765093
XM_005182498	Act79B	0.502913	1.81857	NA	LOC101901018	0.765093
XR_002194711	#N/A	0.143725	1.81804	NA	NA	0.76547
XM_005192072	Marcal1	0.358304	1.81679	B	LOC101890065	0.766567
XM_020035974	Doa	-0.112639	-1.81674	NA	LOC109612169	0.766567
XM_020037232	kis	-0.330671	-1.81644	NA	LOC101899924	0.766573
XM_020035074	gzl	0.692013	1.81592	E	LOC101900649	0.766573
XM_005176945	Cap-D2	-0.127035	-1.81565	C	LOC101893175	0.766573
XM_011292645	Nepl21	-0.195534	-1.81543	NA	LOC105261564	0.766573
XM_005183350	unc-13-4A	-0.202869	-1.8154	D	LOC101896881	0.766573
XM_020035722	Afti	-0.675147	-1.81503	E	LOC101900314	0.766713
XM_005182258	#N/A	0.776071	1.8145	NA	NA	0.7671
XM_005182448	CG6839	-0.258069	-1.81392	C	LOC101892491	0.767256
XM_005179937	CG1628	0.140057	1.81385	A	LOC101894024	0.767256
XM_005191987	vimar	0.163368	1.81316	C	LOC101888681	0.767646
XM_020034924	Shab	-0.653716	-1.81305	D	LOC101900306	0.767646
XM_005177363	Cul2	0.0932863	1.81208	B	LOC101900302	0.768301
XM_011293850	Lpt	-0.592751	-1.81137	B	LOC101897344	0.768301
XM_005187097	CG2059	-0.12161	-1.81132	B	LOC101896086	0.768301
XM_011295525	rictor	0.594156	1.81044	A	LOC101892176	0.768301
XM_011296435	sqz	-0.221583	-1.81032	E	LOC101897308	0.768301
XM_005183737	CG34026	-0.172774	-1.81014	C	LOC101891757	0.768301
[truncated: 16,022 more rows]

## Sheet: SuppFile1D
Supplementary File 1D - List of house fly genes, gene module assignments, and module membership values according to WGCNA.
Transcript ID	Significant Module	module color	kMEdarkturquoise	kMEpurple	kMEpink	kMEtan	kMEmagenta	kMEblue	kMEbrown	kMEdarkgreen	kMEdarkred	kMEyellow	kMEblack	kMElightyellow	kMEgreenyellow	kMEmidnightblue	kMEcyan	kMElightcyan	kMEorange	kMEdarkorange	kMEsalmon	kMEroyalblue	kMEred	kMEturquoise	kMEdarkgrey	kMEgreen	kMEgrey60	kMElightgreen	kMEgrey	cor.Ym	cor.IIIm
XM_011293136	YES	darkred	0.0540606	-0.0994889	-0.0637802	0.0365054	0.221748	-0.0285097	-0.00287959	0.359483	0.481833	0.0934205	0.128026	0.204323	0.294929	0.147512	-0.332914	-0.195417	-0.239796	0.0313024	-0.0681483	-0.0569946	-0.0915171	-0.0453287	-0.0825215	-0.110263	0.0208153	0.0663308	0.182415	0.339906	-0.339906
XM_011294659	YES	darkred	0.16346	0.236584	-0.126147	-0.193387	-0.178797	-0.0465703	-0.26345	-0.331557	-0.515623	-0.2015	-0.414053	-0.402862	-0.342024	-0.203892	0.103292	0.0464935	0.0334745	0.598335	-0.00242645	0.0415277	0.378307	0.345048	0.118848	0.283421	0.270143	0.0575976	-0.206424	-0.299695	0.299695
XM_005175182	YES	darkred	0.24615	0.157931	0.0929137	-0.0349412	-0.220898	-0.0631895	-0.188384	-0.43702	-0.40028	-0.0287213	-0.317472	-0.265996	-0.0813967	0.0941848	-0.169127	0.127811	0.221806	0.00114124	-0.122976	-0.00395743	0.315671	0.134977	0.0535823	0.0400316	0.280414	0.0533572	-0.119896	-0.220151	0.220151
XM_011292855	YES	darkred	0.261925	0.264354	-0.0555306	0.179457	-0.14889	-0.0311142	0.132424	0.382172	0.570659	0.0992337	0.359142	0.348625	0.233959	0.242269	-0.019366	-0.220934	-0.259383	-0.522739	-0.253491	0.025573	-0.236483	-0.123371	-0.381114	-0.0899391	0.180836	0.148356	-0.0440441	0.632798	-0.632798
XM_011293343	YES	darkred	0.105395	0.0685553	-0.117324	-0.0329214	-0.0576484	-0.00880499	0.0257475	0.38226	0.657756	-0.00020132	0.237867	0.3439	0.0795116	0.286861	0.00681584	-0.260041	-0.357153	-0.382875	-0.0544377	-0.227528	-0.150409	0.069218	-0.154645	0.114725	0.270251	0.359483	-0.0117901	0.807978	-0.807978
XM_005175351	YES	darkred	0.445215	0.148523	0.323703	0.211589	0.0346578	0.0340198	0.263374	0.431459	0.46118	0.182306	0.32513	0.163595	0.269024	0.115171	0.0360845	-0.439069	-0.227478	-0.442052	-0.123154	0.102771	-0.281522	-0.375465	-0.213883	-0.287155	-0.205763	-0.0489337	0.149906	0.392037	-0.392037
XM_005175350	YES	darkred	0.0822217	0.251536	-0.255439	-0.501936	-0.6285	-0.522117	-0.568209	-0.626995	-0.724161	0.117865	-0.599194	-0.408279	-0.0600002	-0.0385187	0.375933	0.000150281	0.388304	0.143274	0.178217	0.686721	0.705146	0.334427	0.155278	0.0368786	-0.131015	-0.517393	0.112182	-0.546835	0.546835
XM_005175548	YES	darkred	-0.00457148	-0.0768757	-0.104642	0.171269	0.369392	0.249063	0.0704984	0.752453	0.769594	-0.178778	0.199834	0.241797	0.0839709	-0.0788102	-0.411627	-0.302159	-0.660888	-0.0312725	0.0565223	-0.314891	-0.212385	0.109389	-0.0998897	0.177259	0.186302	0.455705	-0.0334954	0.547562	-0.547562
XM_020037393	YES	darkred	-0.118577	0.0365447	0.175458	0.384204	0.367947	0.215114	0.268203	0.606039	0.764008	0.0871823	0.469133	0.41292	0.181362	0.149186	-0.527646	-0.211748	-0.38163	-0.329751	-0.140261	-0.30067	-0.438125	-0.24402	-0.0896871	-0.11561	0.0781789	0.399781	0.161086	0.589876	-0.589876
XM_011295092	YES	darkred	0.139113	0.178902	-0.114048	-0.463613	-0.446092	-0.206287	-0.256504	-0.535471	-0.518202	-0.0386683	-0.407709	-0.41326	-0.334498	0.216168	0.293855	-0.183374	0.146425	0.1515	0.062317	0.326866	0.399369	0.251518	0.304424	0.242718	0.231407	-0.055163	0.00885011	-0.0484157	0.0484157
XM_005176828	YES	darkred	0.00850116	0.231976	-0.329797	-0.162	-0.194818	-0.11926	-0.165232	0.432946	0.648069	-0.115778	-0.0193082	0.139604	0.49868	0.100769	0.0363287	-0.204868	-0.47719	-0.276286	-0.0742552	0.186173	0.0872636	0.251297	-0.349406	0.202494	0.249537	0.0311782	0.201659	0.51097	-0.51097
XM_020040084	YES	darkred	-0.0321526	0.226286	-0.01226	0.194011	0.053624	0.156665	-0.00738795	0.278733	0.568385	-0.195442	0.00506379	0.0345415	0.375948	0.286099	-0.409987	-0.0753291	-0.465261	0.0733707	0.00805956	-0.017934	-0.00569107	0.133458	-0.200972	0.160666	0.265916	0.303592	0.404153	0.469165	-0.469165
XM_011298123	YES	darkred	0.103221	-0.0862425	0.373643	0.280951	0.0441069	-0.000576581	0.220168	-0.346443	-0.592162	0.294961	0.181393	0.0194301	-0.303006	-0.196951	-0.0616803	0.20875	0.579985	-0.0412271	-0.130271	-0.0758006	-0.175799	-0.439932	0.116481	-0.42546	-0.351869	-0.287811	-0.109257	-0.579122	0.579122
XM_020040155	YES	darkred	0.0837487	-0.0349623	0.227942	-0.0332661	-0.0568714	0.139897	0.163502	-0.393488	-0.459612	-0.083881	-0.0377716	-0.236693	-0.319112	-0.0874296	0.0261612	0.170495	0.259487	0.16594	0.142669	-0.19057	-0.0460522	-0.0760017	0.200814	0.0779002	-0.00447757	0.0696277	0.141819	-0.327941	0.327941
XM_005177483	YES	darkred	0.373936	0.269623	0.279064	-0.0364892	-0.311763	-0.0162151	0.246636	-0.339271	-0.403303	0.158862	0.100768	-0.191516	-0.0945425	0.101879	0.109089	-0.153735	0.302503	-0.119033	-0.259379	0.0922525	-0.123554	-0.314603	0.190474	-0.138974	0.057793	-0.135946	0.142637	-0.246156	0.246156
XM_005177482	YES	darkred	0.451648	0.292994	0.32446	-0.018979	-0.285659	-0.00692309	0.186291	-0.319074	-0.497741	0.117474	-0.0149558	-0.333262	-0.134924	-0.0243678	0.108853	-0.21767	0.221279	0.0311436	-0.174847	0.213119	-0.026851	-0.276962	0.157699	-0.129147	-0.0230274	-0.197614	0.145688	-0.369068	0.369068
XM_005177491	YES	darkred	-0.000560858	-0.0725903	0.406892	0.54493	0.421896	0.300302	0.604331	0.597534	0.811672	0.197424	0.778895	0.619133	0.389007	0.18451	-0.327001	0.0197706	-0.16011	-0.452942	-0.268624	-0.592975	-0.767792	-0.581668	-0.320312	-0.368765	-0.11522	0.305854	0.22718	0.465049	-0.465049
XM_005177485	YES	darkred	-0.183851	-0.146996	0.236405	0.339056	0.455682	0.291	0.231824	0.404818	0.688162	-0.0146223	0.25694	0.198696	0.392809	0.399735	-0.560761	-0.0795164	-0.349786	-0.150166	-0.104059	-0.214967	-0.319245	-0.196022	-0.0480264	-0.0897302	0.114539	0.380455	0.156408	0.619023	-0.619023
XR_002194019	YES	darkred	-0.23638	-0.369417	0.339871	0.526216	0.615431	0.448242	0.668432	0.395331	0.647951	0.0537363	0.704835	0.493184	0.390515	0.266778	-0.368712	0.270159	-0.00214705	-0.392755	-0.104676	-0.58415	-0.797366	-0.553187	-0.165964	-0.300874	-0.18736	0.288479	0.12894	0.395587	-0.395587
XM_011298292	YES	darkred	-0.0791974	-0.136086	-0.118864	0.0696477	0.0546677	-0.173385	-0.132612	-0.419177	-0.680652	0.143577	-0.120855	-0.104981	-0.290029	-0.214526	0.175739	0.26669	0.478851	0.0857763	-0.00402801	0.35357	0.137484	-0.07348	-0.0740565	-0.241199	-0.353987	-0.562384	-0.408522	-0.491437	0.491437
XM_005177603	YES	darkred	-0.0924087	-0.128956	0.0696282	0.0239702	0.220451	0.130726	-0.0639301	0.276746	0.408629	-0.111045	-0.0416788	0.0993412	0.0670531	0.0621176	-0.301186	-0.0588235	-0.289158	0.0465201	0.134623	-0.348632	0.029754	0.155963	0.0995609	0.140447	0.158439	0.44514	0.0835648	0.312221	-0.312221
XR_002194044	YES	darkred	0.410937	0.084184	0.0822904	0.131847	0.020288	-0.0602603	0.0402805	-0.20443	-0.504903	0.07354	0.0467419	-0.0547417	-0.170586	-0.429671	0.162728	0.186869	0.297855	0.151732	0.0935708	-0.0120324	-0.010409	-0.132302	-0.236456	-0.206479	-0.328755	-0.324697	-0.0681824	-0.509829	0.509829
XM_005177827	YES	darkred	-0.158086	0.170046	-0.303845	-0.137462	0.123105	-0.125442	-0.289197	0.591858	0.70313	-0.015817	0.0224537	0.243178	0.229043	0.0355385	-0.203011	-0.368876	-0.630881	-0.0888706	-0.100714	0.0663347	0.0812971	0.289448	-0.179956	0.205359	0.328453	0.225621	0.0554967	0.574658	-0.574658
XR_002194050	YES	darkred	0.0693558	0.0363363	0.353175	0.523959	0.571218	0.489812	0.588341	0.807254	0.818036	-0.0371085	0.645929	0.409053	0.174732	-0.0621653	-0.512312	-0.210984	-0.526043	-0.310861	-0.366202	-0.611712	-0.728153	-0.404694	-0.186865	-0.0745132	0.229622	0.5614	0.0210136	0.587143	-0.587143
XM_020034851	YES	darkred	0.11927	-0.161828	0.0272753	0.137649	0.0244891	0.193242	0.131435	-0.368604	-0.590784	-0.22977	-0.0674697	-0.212987	-0.389214	-0.291441	0.335499	0.421424	0.283744	0.144386	0.278237	-0.0433049	-0.0207965	0.0132169	-0.098493	0.0646434	-0.222552	-0.114879	-0.351241	-0.346914	0.346914
XM_005178322	YES	darkred	0.222924	0.0629115	0.0653066	-0.0489345	-0.108661	-0.0116786	0.00523238	-0.220251	-0.442491	0.0238093	-0.0696957	-0.235075	-0.25732	-0.0919994	0.21296	-0.154996	0.126973	-0.0648931	-0.108894	0.334571	0.0536784	-0.0800998	0.169467	-0.0194421	0.0203265	-0.225905	-0.270558	-0.255877	0.255877
XR_002194137	YES	darkred	0.0920793	0.0953943	-0.0209127	0.0720351	-0.248057	-0.0400245	-0.228972	-0.378432	-0.641805	-0.132419	-0.406652	-0.349807	-0.459255	-0.323286	0.10409	0.16221	0.1499	0.302407	0.159309	0.142013	0.379041	0.217847	-0.0360018	0.100691	-0.059823	-0.139605	-0.293534	-0.427924	0.427924
XM_005178862	YES	darkred	0.32542	0.360112	0.0962296	-0.0155081	-0.0308275	-0.0503524	0.0985032	0.527036	0.652715	0.142024	0.330469	0.288994	0.199079	0.120083	-0.156838	-0.458028	-0.473922	-0.150089	-0.22435	-0.198918	-0.222084	-0.0944505	-0.267576	-0.00742082	0.269661	0.332506	0.359853	0.509106	-0.509106
XM_020035181	YES	darkred	0.256112	0.360739	0.141484	0.0102946	-0.120969	-0.0728101	0.0409024	0.629906	0.710844	0.150412	0.204482	0.178489	0.296332	0.0598828	-0.220534	-0.604435	-0.586553	0.0434169	-0.230393	-0.0417341	-0.113677	-0.0827472	-0.137233	-0.0169138	0.225679	0.27406	0.44573	0.445989	-0.445989
XM_020035187	YES	darkred	0.102519	0.206321	0.153233	-0.0765432	0.105686	0.0824861	0.081667	0.65913	0.748667	0.0386125	0.132349	0.0569269	0.366984	0.151177	-0.351973	-0.677681	-0.650785	-0.101648	-0.206879	-0.000857149	-0.142557	-0.0587559	0.165865	0.0972462	0.31278	0.386311	0.377793	0.566104	-0.566104
XM_005178912	YES	darkred	0.210934	0.228824	0.0296735	-0.128478	-0.481372	-0.381771	-0.287374	-0.738366	-0.859435	0.252923	-0.317277	-0.292606	-0.247745	0.0246887	0.248026	0.114789	0.56323	0.176555	-0.0880121	0.424859	0.404487	-0.0122156	0.0144414	-0.211438	-0.138284	-0.523361	-0.0803268	-0.572095	0.572095
XM_020035273	YES	darkred	0.22195	0.261194	-0.176388	0.0132656	-0.031441	-0.199804	-0.0883568	0.521749	0.663181	0.188929	0.327119	0.518997	-0.0135923	0.105499	0.0433093	-0.378054	-0.384841	-0.310103	-0.231287	-0.208995	-0.134091	0.0379778	-0.350475	-0.0308071	0.224771	0.224484	-0.103754	0.756426	-0.756426
XM_005179122	YES	darkred	0.029398	0.16022	0.0761318	-0.0568015	-0.102784	0.150014	0.190315	0.438938	0.55419	-0.092916	0.177679	0.105651	0.205423	0.08412	-0.0549115	-0.325779	-0.369421	-0.137384	-0.0044075	-0.150836	-0.187785	-0.0106356	0.216985	0.180312	0.197709	0.422051	0.341658	0.406432	-0.406432
XM_011292467	YES	darkred	0.00450804	-0.0282681	-0.132165	0.132258	-0.0622607	-0.145843	-0.140642	-0.420702	-0.674128	0.0930789	-0.00380143	0.115665	-0.648001	-0.35896	0.301084	0.403164	0.471143	0.0835105	0.0202147	-0.135194	0.0942549	0.0555106	-0.110923	-0.0940202	-0.13458	-0.186645	-0.602825	-0.366772	0.366772
XM_005179666	YES	darkred	-0.0971135	-0.0512387	0.194476	0.190944	0.463222	0.508708	0.511975	0.623525	0.786476	-0.261458	0.359895	0.105586	0.462752	0.084	-0.443607	-0.136766	-0.534245	-0.311822	-0.104355	-0.371751	-0.54216	-0.189043	-0.0202484	0.175915	0.262061	0.523701	0.340231	0.489591	-0.489591
XM_005179734	YES	darkred	0.331886	0.27096	0.289494	0.28043	0.103277	0.265819	0.264179	0.557716	0.759072	-0.0489875	0.307575	0.147237	0.180846	0.274161	-0.451911	-0.42527	-0.614289	-0.128527	-0.320407	-0.374479	-0.319555	-0.14908	-0.235468	0.0611446	0.458314	0.560241	0.135648	0.729186	-0.729186
XM_020035461	YES	darkred	0.181515	0.152938	0.10471	0.0148281	0.0188776	0.0527508	0.128008	0.506527	0.623155	0.0375991	0.247797	0.193637	0.274955	0.127103	0.0183469	-0.38388	-0.411124	-0.451373	-0.184815	-0.0543189	-0.216346	-0.0985181	-0.147531	0.0210885	0.191865	0.259748	-0.00567252	0.592477	-0.592477
XM_005179896	YES	darkred	0.174666	0.0581066	0.0460527	-0.234472	-0.407368	-0.0225881	-0.146644	-0.648029	-0.794638	-0.204107	-0.54667	-0.663421	-0.148229	-0.106219	0.198961	0.14385	0.339932	0.235468	0.289798	0.39378	0.43857	0.18235	0.293902	0.162592	-0.0998361	-0.25607	0.0857246	-0.641576	0.641576
XM_005179919	YES	darkred	0.20174	0.0959312	0.479215	0.322572	0.313812	0.361626	0.483056	0.647086	0.844775	0.037027	0.456976	0.195079	0.518643	0.30709	-0.518505	-0.385949	-0.49493	-0.26501	-0.288321	-0.307393	-0.521289	-0.412487	-0.0919767	-0.133698	0.181419	0.455373	0.422355	0.573225	-0.573225
XM_011292912	YES	darkred	0.0251726	-0.0217662	-0.0214575	-0.102464	-0.22636	-0.0850795	-0.165417	-0.384346	-0.504853	-0.114458	-0.363779	-0.325728	-0.0114392	-0.237744	0.306367	0.238446	0.301767	0.323898	0.416251	0.178892	0.3276	0.15652	0.159162	0.0351149	-0.375913	-0.271057	0.105792	-0.530904	0.530904
XM_005180398	YES	darkred	-0.180107	-0.18685	-0.322923	0.0707239	0.080943	-0.172768	-0.320226	-0.457227	-0.583141	0.00203925	-0.167095	0.0674165	-0.371259	-0.231812	0.128653	0.551828	0.477238	0.178483	0.21476	0.0243043	0.255363	0.227397	-0.0768975	-0.058449	-0.214941	-0.272628	-0.496251	-0.380686	0.380686
XM_011293121	YES	darkred	0.0184035	-0.093943	-0.167783	-0.15699	0.020429	-0.237115	-0.264384	-0.390575	-0.66613	0.123048	-0.210427	-0.127446	-0.257161	-0.295141	0.184872	0.19326	0.392415	0.274326	0.0322618	0.185087	0.255741	0.0916117	0.0575124	-0.103529	-0.177635	-0.383684	-0.322903	-0.547646	0.547646
XM_020035863	YES	darkred	-0.116114	-0.0444012	-0.25638	-0.0220056	0.146936	0.0454212	-0.110116	0.300092	0.68054	-0.163787	0.0260228	0.20126	0.192144	0.423591	-0.160648	-0.0853301	-0.385195	-0.161495	0.0876205	-0.127729	0.00207465	0.246464	-0.180971	0.198468	0.229391	0.315569	-0.0263433	0.819001	-0.819001
XM_020035904	YES	darkred	0.0808377	0.233822	0.0334059	-0.0535462	-0.11678	0.094433	0.0573717	0.231824	0.601134	-0.173606	0.00372108	0.000125883	0.472844	0.308857	-0.213364	-0.109089	-0.389783	-0.152002	-0.0495425	-0.148644	-0.028819	0.116398	-0.205106	0.216184	0.364862	0.35622	0.462517	0.473923	-0.473923
XM_011293284	YES	darkred	0.336653	0.204433	0.37839	0.306606	-0.0330196	0.187229	0.275541	0.457024	0.652403	0.0937861	0.351615	0.242009	0.222769	0.299961	-0.414156	-0.354727	-0.382233	-0.19581	-0.259712	-0.339201	-0.299219	-0.25499	-0.126089	-0.109349	0.272943	0.483095	0.265367	0.522424	-0.522424
XM_011293285	YES	darkred	0.0562283	0.105185	-0.0983359	-0.00731426	-0.0997611	-0.0811456	-0.0680682	0.395484	0.626993	0.0306834	0.126845	0.272728	0.348322	0.169036	-0.0919143	-0.186001	-0.353159	-0.104766	0.0283087	-0.0691768	-0.012219	0.0957145	-0.176354	0.0316251	0.127187	0.226195	0.303158	0.279158	-0.279158
XM_011293310	YES	darkred	-0.241722	-0.0305593	-0.400172	-0.13824	0.0963919	-0.137348	-0.109006	0.475675	0.700793	-0.0238367	0.1654	0.378661	0.424195	0.0546784	0.0697175	-0.0280762	-0.324485	-0.163364	0.0519578	0.0163902	-0.0792925	0.168189	-0.309767	0.081373	-0.00794047	-0.0379999	0.212175	0.467057	-0.467057
XM_011293313	YES	darkred	0.0894198	-0.0184416	-0.032	-0.382979	-0.353438	-0.1692	-0.343386	-0.434539	-0.60865	-0.0792438	-0.551103	-0.498714	-0.357208	-0.151564	0.174429	-0.129854	0.118877	0.454762	0.392828	0.281192	0.523496	0.311414	0.448951	0.215002	-0.0548557	-0.0655788	0.120117	-0.418429	0.418429
XM_011293339	YES	darkred	-0.0677893	-0.221406	0.45155	0.449711	0.664368	0.568697	0.667881	0.593532	0.758315	-0.0776771	0.594873	0.338839	0.356626	0.15498	-0.464624	-0.00772906	-0.32137	-0.204935	-0.145456	-0.710715	-0.74817	-0.453973	0.0149846	-0.107424	0.0482887	0.558149	0.22843	0.460876	-0.460876
XM_005181482	YES	darkred	0.00663598	-0.245886	-0.0837027	-0.0248721	0.25432	0.16877	0.0899079	-0.29245	-0.627543	-0.161343	-0.0667172	-0.180704	-0.572546	-0.321715	0.254769	0.204266	0.283335	0.0970818	0.0890653	-0.0705723	-0.0473142	0.018813	0.231282	0.0927449	-0.0992769	-0.122995	-0.571208	-0.388259	0.388259
XM_020036105	YES	darkred	-0.0344788	-0.141342	-0.135845	-0.326114	-0.0321345	-0.143246	-0.200973	-0.388764	-0.741032	0.0195007	-0.271258	-0.234354	-0.45882	-0.399872	0.241294	0.0854181	0.298033	0.321918	0.0547645	0.105519	0.247129	0.157094	0.336586	0.102996	0.00855866	-0.187147	-0.252663	-0.548595	0.548595
XR_002194424	YES	darkred	0.0687856	0.0841646	0.136187	0.099358	-0.0110015	-0.0565005	0.197906	0.639091	0.753068	0.242989	0.479604	0.499783	0.231082	0.0791037	0.0626727	-0.360179	-0.327098	-0.396595	-0.0465368	-0.142644	-0.349659	-0.257249	-0.229973	-0.196594	-0.156099	0.14994	0.322385	0.438974	-0.438974
XM_020036180	YES	darkred	0.0716007	0.101074	0.446404	0.21343	0.268151	0.261069	0.44334	0.578721	0.773888	0.1194	0.460729	0.228746	0.367727	0.307665	-0.356858	-0.445327	-0.457797	-0.211605	-0.315139	-0.282019	-0.511757	-0.413648	0.0260965	-0.121183	0.180862	0.392308	0.441326	0.526894	-0.526894
XM_020036192	YES	darkred	0.0745546	0.262532	0.157268	0.205525	0.0296573	0.107946	0.19974	0.426688	0.613858	0.0808879	0.301123	0.281591	0.459696	0.141741	-0.439973	-0.168176	-0.279035	-0.305138	-0.382378	-0.310956	-0.274726	-0.174336	-0.0934399	-0.0630376	0.323762	0.323469	0.289272	0.354966	-0.354966
XM_011293543	YES	darkred	0.388167	0.166855	0.149273	-0.0559898	-0.247186	-0.23544	-0.159234	-0.463905	-0.800748	0.237028	-0.137918	-0.175755	-0.619855	-0.237874	0.316892	-0.101692	0.385511	0.212338	-0.0783491	0.121788	0.219186	-0.0697034	0.14356	-0.162052	-0.102145	-0.241852	-0.364341	-0.396209	0.396209
XM_020036223	YES	darkred	-0.103565	-0.0843319	0.0939218	0.201264	-0.0242304	-0.0436609	-0.0778307	-0.335494	-0.54588	0.0348899	-0.152118	-0.121727	-0.279773	-0.238102	0.192651	0.36247	0.320852	0.171449	0.0277716	0.147899	0.143776	-0.0407557	-0.205571	-0.161987	-0.271726	-0.317443	-0.325383	-0.482038	0.482038
XM_005182658	YES	darkred	-0.111569	0.0721052	0.246063	0.476553	0.119574	0.198455	0.469317	0.401529	0.693991	0.165205	0.621349	0.53723	0.359409	0.275009	-0.325811	0.0773483	-0.0961991	-0.462776	-0.378036	-0.442976	-0.590393	-0.42913	-0.300832	-0.249231	0.10789	0.310634	0.162286	0.580145	-0.580145
XM_005182820	YES	darkred	0.0358066	-0.0288107	-0.102188	-0.355944	-0.240566	-0.258188	-0.361328	-0.594321	-0.72636	0.0237232	-0.456711	-0.3573	-0.167368	-0.131918	0.223582	0.123894	0.32973	0.462524	0.15393	0.244499	0.458673	0.226555	0.27022	0.070159	-0.0397256	-0.344921	0.0733067	-0.547102	0.547102
XM_020036569	YES	darkred	-0.0198258	-0.136633	0.230029	0.249849	0.27122	0.155446	0.389426	0.665697	0.856819	0.168503	0.557973	0.490724	0.390659	0.222172	-0.127104	-0.262003	-0.298555	-0.417642	-0.0584465	-0.236768	-0.522918	-0.390522	-0.114473	-0.252462	-0.199599	0.196106	0.295433	0.522741	-0.522741
XR_225570	YES	darkred	-0.290899	-0.184221	-0.514729	-0.432574	0.0908249	0.022662	-0.246073	0.436629	0.563148	-0.334719	-0.221369	-0.0781688	0.222069	0.0687442	0.0167593	-0.304222	-0.581752	-0.0124012	0.235469	0.245238	0.17428	0.47306	0.121191	0.483481	0.254543	0.150076	0.0334929	0.516614	-0.516614
XR_225571	YES	darkred	0.0670466	0.220194	-0.0130147	0.0410433	-0.0692421	0.0834771	0.16981	0.498974	0.646804	-0.0332277	0.273697	0.197406	0.245148	0.115741	-0.127948	-0.309449	-0.387455	-0.331689	-0.209639	-0.0723811	-0.236902	-0.0590789	-0.174387	0.0876741	0.24055	0.237814	0.153661	0.481307	-0.481307
XR_002194557	YES	darkred	-0.151669	-0.252302	-0.0781	0.182867	0.0766637	-0.0503703	-0.0799328	-0.517521	-0.713734	0.0336198	-0.0658861	0.0329344	-0.608534	-0.263929	0.239127	0.538224	0.564665	0.157949	0.179851	-0.137913	0.0819784	0.0152433	-0.039669	-0.13084	-0.315777	-0.245409	-0.549732	-0.442178	0.442178
XM_020036948	YES	darkred	-0.0684505	-0.0746803	0.223836	0.341041	0.481232	0.275447	0.438099	0.734108	0.853066	0.0801568	0.562439	0.434137	0.468677	0.112217	-0.322215	-0.193346	-0.397051	-0.305943	-0.238265	-0.291754	-0.591777	-0.391131	-0.199021	-0.202939	-0.0475519	0.220098	0.229707	0.495025	-0.495025
XM_005184050	YES	darkred	0.17974	0.116324	0.236907	-0.121932	-0.308933	-0.0236012	0.0769517	-0.539703	-0.539836	0.0274038	-0.243288	-0.479012	0.19957	0.184647	0.0357297	0.0486404	0.355642	0.136212	-0.0414358	0.380001	0.149037	-0.162886	0.205504	-0.0994566	-0.0885608	-0.332254	0.345542	-0.485032	0.485032
XM_005184196	YES	darkred	0.121872	0.122435	0.349466	0.394016	0.388076	0.221644	0.349706	0.654539	0.718827	0.14925	0.511835	0.367206	0.406012	0.0849204	-0.477725	-0.279597	-0.397629	-0.162393	-0.299915	-0.231199	-0.484714	-0.393458	-0.158699	-0.244861	0.0441364	0.255681	0.357647	0.403725	-0.403725
XM_005184246	YES	darkred	-0.117095	-0.112297	0.00750592	0.0207448	0.0220641	0.0370535	0.135813	0.16693	0.538478	-0.0126671	0.154969	0.179572	0.376171	0.478666	0.0368418	0.00171435	-0.123538	0.0220892	0.226623	-0.0338981	-0.147818	-0.0790727	-0.173828	-0.0727332	-0.240654	0.0317186	0.483125	0.426379	-0.426379
XM_020037059	YES	darkred	-0.194255	-0.112175	-0.0864924	-0.0568614	0.00375746	-0.017624	0.00897817	0.260254	0.664542	0.0448205	0.135116	0.326164	0.337237	0.511466	-0.119085	-0.0948603	-0.202434	-0.14438	-0.060739	-0.195034	-0.0865042	0.0382996	0.0185266	0.0177825	0.173036	0.294646	0.208543	0.662312	-0.662312
XM_020037130	YES	darkred	-0.00198121	0.0835043	-0.0174433	-0.313038	-0.433232	-0.16294	-0.108235	-0.499792	-0.58819	-0.0198409	-0.355057	-0.459688	0.110948	-0.0467436	0.265383	0.102238	0.357938	0.154312	0.147618	0.513513	0.304784	0.0498513	0.209078	0.0263981	-0.186905	-0.424896	0.303448	-0.619635	0.619635
XM_005184740	YES	darkred	-0.131448	-0.128397	-0.191793	0.0690317	-0.289785	-0.34733	-0.271959	-0.679559	-0.733131	0.223197	-0.15792	0.0852845	-0.403951	-0.0236429	0.416621	0.513002	0.692458	0.12413	0.0574607	0.107018	0.273798	0.036939	-0.184875	-0.263573	-0.341414	-0.510232	-0.478018	-0.39764	0.39764
XM_005184840	YES	darkred	-0.182328	-0.242787	-0.311653	-0.313861	-0.217072	-0.215652	-0.446853	-0.587608	-0.59326	-0.100095	-0.537147	-0.385836	-0.294619	0.0603622	0.102733	0.167445	0.30784	0.283736	0.332693	0.401294	0.53515	0.370486	0.260126	0.158752	-0.0726852	-0.328578	-0.198521	-0.349326	0.349326
XM_011294921	YES	darkred	0.136995	0.250075	0.171791	0.0704273	-0.190741	-0.104213	0.195224	0.386382	0.763695	0.26014	0.393432	0.37873	0.46008	0.473098	-0.0699419	-0.309118	-0.222601	-0.362048	-0.243873	-0.125794	-0.281577	-0.270792	-0.299247	-0.208328	0.0557636	0.159604	0.451001	0.615782	-0.615782
XM_011294922	YES	darkred	0.00390514	0.2347	-0.0524603	-0.055838	-0.0676152	0.0361288	-0.0496016	0.474049	0.764517	-0.107768	-0.0114544	0.0103331	0.390452	0.332363	-0.282804	-0.421057	-0.629448	-0.110999	-0.0756728	0.0625333	0.0111326	0.139667	-0.183448	0.202709	0.325401	0.296746	0.338314	0.663575	-0.663575
XM_011294919	YES	darkred	0.0492173	0.103882	-0.191269	-0.263637	-0.274077	-0.0604171	-0.116072	0.334135	0.654409	-0.1285	-0.0773896	0.000871729	0.285905	0.380798	0.0588001	-0.420586	-0.500357	-0.082791	0.0812871	0.111764	0.105003	0.233382	-0.0660673	0.26728	0.250517	0.206606	0.265262	0.703796	-0.703796
XM_005185514	YES	darkred	-0.0659063	-0.0919785	-0.109117	-0.180889	-0.308659	-0.266477	-0.216852	-0.798594	-0.948889	0.108281	-0.306334	-0.242694	-0.325148	-0.105135	0.393722	0.409421	0.714457	0.118233	0.151543	0.313688	0.332476	0.0560385	0.135393	-0.117218	-0.290899	-0.512608	-0.19599	-0.692547	0.692547
XM_005185517	YES	darkred	0.0374006	-0.0814926	0.308624	0.491875	0.386058	0.403595	0.641123	0.587717	0.814421	0.0186714	0.703593	0.485762	0.37085	0.239777	-0.225679	-0.0144303	-0.271356	-0.520735	-0.228398	-0.492032	-0.755243	-0.486948	-0.341991	-0.200557	-0.00524243	0.360037	0.0972143	0.663277	-0.663277
XM_020037474	YES	darkred	0.0343822	0.0578087	-0.192218	-0.330649	-0.417805	-0.376745	-0.443732	-0.759637	-0.940145	0.0895876	-0.489504	-0.333513	-0.296603	-0.164144	0.352349	0.247106	0.547983	0.268852	0.1298	0.386211	0.554503	0.256756	0.200422	0.0102533	-0.0912599	-0.428569	-0.174431	-0.646248	0.646248
XM_005185928	YES	darkred	0.103201	0.0942447	-0.0685068	-0.218655	-0.372032	-0.387368	-0.338756	-0.677159	-0.904533	0.195189	-0.371031	-0.28696	-0.293	-0.165775	0.398656	0.177712	0.552103	0.408505	0.0598032	0.395669	0.441992	0.074326	0.0688345	-0.16254	-0.286522	-0.592838	-0.0889464	-0.698775	0.698775
XR_002194804	YES	darkred	-0.21123	0.0736433	-0.197969	0.302409	0.287564	0.174572	-0.0690555	0.469815	0.583034	-0.225445	0.0809763	0.205638	0.193934	-0.0645741	-0.41936	0.0912675	-0.529021	0.236758	-0.00866768	-0.240212	-0.0690541	0.218326	-0.385579	0.180145	0.226338	0.281833	0.0192471	0.3828	-0.3828
XM_005185967	YES	darkred	0.154738	-0.115645	0.236105	0.000778253	-0.0939052	0.123228	0.25781	-0.492632	-0.583534	0.0573724	0.0503608	-0.170159	-0.365967	0.0875006	0.148138	0.0922469	0.455301	-0.118574	-0.0801169	-0.132947	-0.139837	-0.241446	0.374846	-0.0683509	0.0241812	0.0316793	-0.262838	-0.193385	0.193385
XM_005186004	YES	darkred	-0.102218	-0.214231	-0.0230556	0.141597	0.495007	0.360626	0.406822	0.746128	0.724885	-0.133424	0.477773	0.34766	0.111277	-0.154026	-0.215899	-0.189598	-0.453205	-0.271392	-0.010111	-0.440818	-0.557914	-0.144747	0.0477131	0.110794	0.085709	0.450949	-0.0335281	0.470314	-0.470314
XM_020037662	YES	darkred	0.0271849	0.0447344	-0.117477	0.0435381	0.0569088	0.112573	-0.139681	0.483384	0.666061	-0.258751	-0.115028	-0.00235218	0.234934	0.102195	-0.236438	-0.225788	-0.606012	0.0708401	0.27653	-0.0558983	0.115575	0.292579	-0.206897	0.249067	0.0967974	0.323249	0.17422	0.535942	-0.535942
XM_005186061	YES	darkred	-0.0785605	-0.0313415	-0.186662	-0.40893	-0.560542	-0.498297	-0.450829	-0.763375	-0.800185	0.193195	-0.457021	-0.269631	-0.159677	0.0507043	0.581959	0.209176	0.574418	0.301111	0.240994	0.539551	0.55783	0.191501	0.122733	-0.090123	-0.314426	-0.593735	0.0208437	-0.544491	0.544491
XM_020037719	YES	darkred	-0.157179	-0.174097	-0.260108	0.119365	0.0923601	-0.130227	-0.210802	-0.273643	-0.505519	0.0484647	-0.0402428	0.115093	-0.437977	-0.311251	0.183629	0.379734	0.383561	-0.0675003	0.0984884	0.117819	0.129241	0.103867	-0.0656886	-0.103578	-0.224312	-0.312285	-0.599583	-0.462463	0.462463
XM_011295425	YES	darkred	0.0140508	0.0907708	-0.295438	-0.487636	-0.496845	-0.301509	-0.515675	-0.744148	-0.859536	-0.129695	-0.693977	-0.56087	-0.223289	-0.0799456	0.314201	0.154338	0.367474	0.373654	0.250205	0.505744	0.697471	0.460533	0.309613	0.254567	0.0511699	-0.335344	-0.0620579	-0.563992	0.563992
XM_005186743	YES	darkred	0.0587426	-0.0250838	-0.0452135	-0.196046	-0.324835	-0.172201	-0.221751	-0.748631	-0.966034	-0.0246265	-0.453171	-0.464581	-0.344413	-0.161661	0.362979	0.263659	0.536383	0.239792	0.180709	0.372043	0.411064	0.122708	0.188288	0.00261831	-0.211626	-0.451176	-0.19773	-0.713887	0.713887
XM_011295674	YES	darkred	0.590868	0.154432	0.0851652	-0.303144	-0.383042	-0.280879	-0.195163	-0.454908	-0.6573	0.165879	-0.26015	-0.274741	-0.231624	-0.0913697	0.397108	-0.169983	0.34287	0.270911	0.00743732	0.172326	0.324563	0.021383	0.236246	-0.0939732	-0.0655834	-0.249802	-0.0753969	-0.324509	0.324509
XM_020038031	YES	darkred	-0.147402	0.00784766	-0.0599352	0.278273	0.275184	0.145484	0.169031	0.388997	0.544041	0.00583528	0.417137	0.476545	0.0449247	0.0973531	-0.206322	0.0278763	-0.25784	-0.318787	-0.163161	-0.327487	-0.356941	-0.0818984	-0.231337	-0.00301819	0.188202	0.297687	-0.0646902	0.554662	-0.554662
XM_005187105	YES	darkred	0.138278	0.0330293	0.497105	0.54579	0.320075	0.343599	0.638399	0.59185	0.76355	0.181002	0.755791	0.5193	0.314438	0.196511	-0.410431	-0.0993164	-0.201293	-0.457846	-0.312802	-0.561296	-0.751092	-0.594378	-0.252338	-0.327914	-0.00564426	0.429366	0.239385	0.554607	-0.554607
XM_011295822	YES	darkred	0.414861	0.186527	0.0555014	-0.106855	-0.42259	-0.225963	-0.0585496	-0.297693	-0.604091	0.132446	-0.134604	-0.205697	-0.138789	-0.349793	0.402119	-0.0336404	0.34207	-0.0279999	0.04611	0.363882	0.192261	-0.0891136	-0.0395724	-0.165019	-0.300458	-0.472988	0.0260704	-0.554948	0.554948
XM_020038180	YES	darkred	0.250753	0.228496	-0.222302	-0.284564	-0.330982	-0.0265605	-0.283383	-0.386531	-0.498685	-0.338113	-0.559068	-0.520038	-0.0447123	-0.153667	0.193212	0.0700161	0.0163699	0.187561	0.133283	0.26388	0.483112	0.42719	0.124982	0.364838	0.241594	-0.0759044	-0.090405	-0.314957	0.314957
XM_005187594	YES	darkred	-0.0254247	0.055161	0.227204	-0.0650523	-0.291614	-0.0136323	-0.0188496	-0.407386	-0.445379	-0.0091858	-0.219023	-0.307766	-0.232073	-0.0579856	0.113782	0.046671	0.192901	0.121833	0.105892	0.0563033	0.169822	0.00501029	0.263898	0.0783241	0.0282974	0.0235986	0.100876	-0.331446	0.331446
XM_011296004	YES	darkred	0.0307747	0.419793	-0.0493694	0.0280027	-0.134445	-0.0809979	0.00127535	0.405809	0.587973	0.101279	0.226692	0.314442	0.209824	0.156814	-0.125559	-0.262206	-0.421649	-0.0895427	-0.454105	-0.19946	-0.128071	0.0309487	-0.253997	0.0834036	0.51308	0.375903	0.106228	0.57908	-0.57908
XM_011296127	YES	darkred	-0.132661	-0.0645014	0.173813	0.181573	0.280495	0.243022	0.367112	0.642398	0.923398	0.035928	0.47465	0.392648	0.407037	0.322341	-0.295015	-0.253447	-0.445614	-0.314202	-0.217992	-0.352304	-0.498644	-0.254888	-0.101857	-0.0354215	0.182277	0.436462	0.240886	0.765105	-0.765105
XM_011296129	YES	darkred	0.00724543	0.0471503	-0.233478	-0.367602	-0.424535	-0.44088	-0.463654	-0.761576	-0.943287	0.139774	-0.480514	-0.301706	-0.261382	-0.166545	0.401984	0.240356	0.594149	0.320461	0.128522	0.436787	0.56243	0.239525	0.212004	-0.0382515	-0.168567	-0.530448	-0.120436	-0.692888	0.692888
XM_005188202	YES	darkred	0.132567	-0.00204606	0.14472	0.265143	0.374661	0.0986001	0.175275	0.57236	0.604044	0.142285	0.390778	0.39501	0.231665	-0.0615289	-0.441833	-0.237172	-0.29849	-0.211389	-0.0668669	-0.30487	-0.336766	-0.220061	-0.106626	-0.18199	-0.0470895	0.243803	0.218682	0.532546	-0.532546
XM_005188432	YES	darkred	0.194515	0.395907	-0.13157	-0.0645338	-0.382407	-0.294889	-0.222201	-0.481339	-0.605905	0.129244	-0.116151	-0.0735164	-0.32677	-0.149377	0.284708	0.181389	0.311896	0.179321	-0.249692	0.112252	0.225771	0.09848	-0.255969	-0.0194125	0.168872	-0.249227	-0.246969	-0.297073	0.297073
XM_005188720	YES	darkred	-0.440762	-0.0856387	-0.179778	-0.103265	0.255997	0.0863859	-0.0807707	0.437174	0.501739	-0.106301	-0.0148581	0.126886	0.280685	-0.0555436	-0.28694	-0.11423	-0.401934	-0.092712	-0.0944005	-0.12971	-0.0357023	0.188132	0.173104	0.23255	0.301708	0.315113	0.0139024	0.285154	-0.285154
XM_020038685	YES	darkred	0.0589057	0.096711	-0.297803	-0.0974536	0.00600582	-0.185566	-0.0773757	0.474858	0.585941	0.146127	0.31738	0.521791	-0.13248	0.0467235	0.131183	-0.313575	-0.288678	-0.361467	-0.172798	-0.236883	-0.155206	0.0855386	-0.18932	0.0452187	0.213087	0.218191	-0.244714	0.712245	-0.712245
XM_020038753	YES	darkred	-0.0179078	0.0363996	0.0924696	0.279781	0.483384	0.25932	0.235155	0.676368	0.688153	-0.0577475	0.431194	0.372781	0.0878653	-0.12277	-0.296836	-0.152662	-0.525305	-0.0684119	-0.0838069	-0.445196	-0.431822	-0.112747	-0.2746	0.0331852	0.115657	0.384955	0.0879494	0.444702	-0.444702
XM_011296535	YES	darkred	0.0213462	0.362908	-0.320795	-0.323081	-0.545326	-0.337409	-0.571626	-0.566075	-0.698655	-0.0721393	-0.631428	-0.462096	-0.335415	-0.0776324	0.141136	0.00996103	0.138322	0.306251	-0.0837897	0.514578	0.687088	0.475969	0.0821705	0.262901	0.332052	-0.243447	-0.25196	-0.350708	0.350708
XM_005189170	YES	darkred	0.0251418	0.420957	-0.181418	0.0499102	-0.0516753	-0.137348	-0.210775	0.576523	0.67515	0.0219335	0.0556519	0.227055	0.270695	-0.0567877	-0.295936	-0.314127	-0.58818	0.0616145	-0.275868	-0.0572074	0.060962	0.199072	-0.406131	0.115088	0.360381	0.211488	0.147162	0.476797	-0.476797
XM_020038932	YES	darkred	0.0808759	-0.00383419	0.147952	0.045634	-0.0135921	0.0302842	0.0807554	0.393476	0.404035	0.0276575	0.11506	0.130032	0.0895843	-0.0270258	0.091286	-0.272853	-0.251335	0.153155	0.222168	-0.117004	-0.0838628	-0.0740095	0.016405	-0.0566095	-0.285399	0.0869721	0.328087	0.190056	-0.190056
XM_020039012	YES	darkred	-0.310798	-0.236106	-0.298709	-0.0453346	0.0230617	-0.157362	-0.214144	-0.531833	-0.697184	0.012759	-0.171812	-0.0283244	-0.245905	-0.218809	0.211742	0.569415	0.564498	0.163419	0.176876	0.223465	0.20432	0.127833	0.0310411	-0.0761476	-0.28797	-0.443468	-0.282481	-0.551461	0.551461
XR_002195241	YES	darkred	0.145954	0.123963	-0.0552318	-0.120897	-0.35966	-0.427731	-0.290034	-0.640492	-0.922669	0.310054	-0.195834	-0.0992991	-0.412208	-0.268193	0.420284	0.215528	0.623817	0.229879	-0.0522973	0.297649	0.325903	-0.0190104	-0.0264998	-0.258152	-0.26945	-0.576528	-0.229259	-0.713066	0.713066
XR_002195287	YES	darkred	-0.162591	-0.0618748	0.0122532	-0.0994203	0.178572	0.213412	0.194645	0.318168	0.660171	-0.111519	0.138083	0.0577412	0.502965	0.482138	-0.363983	-0.221485	-0.319546	-0.185996	-0.186781	-0.0964326	-0.223032	-0.0416789	0.251615	0.146489	0.362312	0.340938	0.326136	0.524775	-0.524775
XR_225718	YES	darkred	-0.070824	0.117289	0.11377	0.237053	0.229381	0.257934	0.380307	0.548774	0.678154	-0.06857	0.427747	0.349337	0.297164	0.0183532	-0.142489	-0.0112532	-0.347153	-0.392855	-0.194732	-0.385103	-0.464139	-0.187099	-0.332215	0.0147656	0.128234	0.354453	0.172216	0.410462	-0.410462
XM_020039148	YES	darkred	-0.279225	-0.252136	0.24957	0.337658	0.606545	0.600775	0.573174	0.61182	0.787291	-0.274065	0.412081	0.173656	0.38389	0.121251	-0.468375	0.0193245	-0.431938	-0.204138	-0.0310127	-0.47243	-0.612078	-0.252784	0.027577	0.0978299	0.0949866	0.500982	0.245658	0.424853	-0.424853
XM_020039150	YES	darkred	-0.197422	-0.342196	-0.0890719	0.144571	0.472246	0.0818727	0.158614	0.500924	0.565643	0.100553	0.421776	0.479667	0.108185	0.0265617	-0.0999818	-0.029597	-0.103248	-0.465945	0.119672	-0.208009	-0.379199	-0.169417	-0.109523	-0.172206	-0.288993	0.064542	-0.158652	0.416099	-0.416099
XM_020039220	YES	darkred	0.0754058	-0.0022721	-0.0704226	-0.213811	-0.344619	-0.204135	-0.303161	-0.797453	-0.966305	-0.0278737	-0.497033	-0.459973	-0.329471	-0.125767	0.26672	0.291247	0.533762	0.324126	0.214145	0.333696	0.483119	0.192955	0.206296	0.0290591	-0.148484	-0.403407	-0.11779	-0.706089	0.706089
XM_020039222	YES	darkred	0.209613	0.279247	-0.0192416	-0.0995766	-0.0493674	-0.0188755	0.01702	0.39752	0.495626	-0.0686497	0.102637	0.10159	0.218648	-0.0422226	0.01074	-0.232339	-0.415328	0.177904	0.0468563	-0.158428	-0.0585346	0.0953139	-0.235217	0.13854	0.112202	0.222356	0.451921	0.297994	-0.297994
XM_005190426	YES	darkred	0.373437	0.359208	-0.0297166	-0.245546	-0.361722	-0.131373	-0.18384	-0.24199	-0.541475	-0.0449634	-0.335622	-0.423547	-0.242983	-0.245282	0.129661	-0.254331	0.0215392	0.43218	-0.154653	0.352303	0.338611	0.158568	0.227112	0.147614	0.221824	-0.138397	0.0125674	-0.362522	0.362522
XM_005190482	YES	darkred	0.173137	0.0540747	0.282915	-0.252446	-0.295607	-0.253463	-0.219839	-0.586325	-0.627354	0.229924	-0.394768	-0.434679	0.00217576	0.180972	0.0210141	-0.11814	0.39212	0.257018	-0.011859	0.38555	0.393334	-0.0756102	0.368431	-0.185193	-0.125337	-0.3472	0.255643	-0.483395	0.483395
XM_011297283	YES	darkred	-0.0341152	-0.0794965	0.174759	0.108884	0.398305	0.117014	0.0597006	0.60444	0.584808	0.0657091	0.15758	0.139742	0.359604	0.0183154	-0.325764	-0.397323	-0.457266	-0.0171044	-0.00551382	0.0548131	-0.157665	-0.128189	0.0892137	-0.0950951	-0.0768191	0.168595	0.232091	0.366668	-0.366668
NM_001286898	YES	darkred	-0.287618	-0.219355	0.0165873	0.246977	0.00566803	-0.103158	-0.0148368	-0.524745	-0.625792	0.120813	-0.034828	0.0166101	-0.119002	-0.193256	0.228129	0.658642	0.638657	0.147531	0.101648	0.0910147	0.0438118	-0.14797	-0.174826	-0.309056	-0.49318	-0.537169	-0.191327	-0.713747	0.713747
XM_011297432	YES	darkred	-0.363797	-0.18928	-0.0703651	0.0893403	0.228621	0.18836	0.14548	0.363286	0.611111	-0.183216	0.142193	0.176937	0.334334	0.106686	-0.0293874	0.118142	-0.25631	-0.0822841	0.181838	-0.250631	-0.212106	0.035415	-0.120308	0.114497	-0.0951055	0.178789	0.135299	0.335798	-0.335798
XM_005191198	YES	darkred	0.115799	0.280816	0.0788158	0.174385	-0.247498	-0.104401	0.195358	0.419908	0.587772	0.261081	0.463364	0.469535	-0.0166201	0.173538	0.0773239	-0.31104	-0.169429	-0.51752	-0.343904	-0.193539	-0.314963	-0.237871	-0.25975	-0.157506	0.12922	0.207986	-0.0611305	0.527222	-0.527222
XR_002195420	YES	darkred	0.0227885	0.035308	0.238781	-0.045818	-0.305821	-0.187217	-0.171837	-0.665891	-0.729164	0.176922	-0.378232	-0.416023	-0.0471487	0.164093	0.0494313	0.121466	0.490048	0.228143	-0.0751234	0.426642	0.358485	-0.101635	0.179228	-0.229187	-0.180124	-0.447614	0.0329489	-0.599962	0.599962
XM_005191513	YES	darkred	-0.0638584	-0.105127	-0.0846318	0.165411	0.335758	-0.0180333	-0.0817646	0.237167	0.476755	0.0502943	0.0725624	0.202765	0.390207	0.308778	-0.2676	0.0192762	-0.143976	-0.0760702	-0.0441974	-0.0325711	-0.0418955	-0.0106102	-0.258048	-0.160691	-0.07926	-0.0368959	-0.0697354	0.402171	-0.402171
XR_002195457	YES	darkred	0.16819	0.139948	0.34001	0.533346	0.299301	0.179238	0.423278	0.672759	0.787224	0.235183	0.671525	0.563614	0.268108	0.0976026	-0.417884	-0.16765	-0.308108	-0.363714	-0.388544	-0.469368	-0.60449	-0.48097	-0.482357	-0.353837	-0.00556666	0.233255	0.157496	0.486245	-0.486245
XM_005191841	YES	darkred	0.0973991	0.223661	-0.0214959	0.0875235	-0.161025	-0.160461	-0.272006	-0.428822	-0.638018	0.0674305	-0.285901	-0.204257	-0.187716	-0.176071	-0.0376696	0.191664	0.259529	0.407779	-0.232223	0.178935	0.331593	0.0958224	-0.0427328	-0.084668	0.0926111	-0.303163	-0.21427	-0.569103	0.569103
XR_002195500	YES	darkred	0.0541561	-0.231465	0.145211	-0.0709557	0.0553581	0.0668619	0.0557298	-0.584958	-0.624304	-0.0467658	-0.225193	-0.319959	-0.19895	0.0835785	0.146315	0.284346	0.470353	0.134272	0.12245	-0.0859005	0.0904224	-0.0700398	0.19007	-0.0615689	-0.183367	-0.198381	-0.180154	-0.435824	0.435824
XR_891815	YES	darkred	0.00585581	-0.226509	-0.361205	-0.292102	-0.0488757	-0.198251	-0.258595	-0.463893	-0.783796	-0.0426565	-0.249456	-0.150136	-0.537807	-0.386764	0.499128	0.261511	0.458729	0.254302	0.296014	0.170704	0.272862	0.23452	0.171744	0.069606	-0.271855	-0.388914	-0.462027	-0.508318	0.508318
XM_020037656	NO	black	0.336697	0.241636	0.704903	0.684081	0.113464	-0.0902994	0.456836	0.224655	0.222346	0.72827	0.824488	0.68875	0.0173695	0.135833	-0.183701	-0.0859753	0.253961	-0.36258	-0.611717	-0.395882	-0.627922	-0.874386	-0.467507	-0.841863	-0.277038	-0.049077	0.0760139	0.132612	-0.132612
XM_011295790	NO	black	-0.501427	-0.335357	-0.504422	-0.589574	-0.0927036	0.0750605	-0.460762	-0.320734	-0.191062	-0.613815	-0.852672	-0.693854	-0.0227425	0.108382	0.0607502	0.0863161	-0.221061	0.37518	0.69669	0.43048	0.651129	0.771315	0.471688	0.713602	0.141254	0.0685572	0.087057	-0.0411177	0.0411177
XM_011295288	NO	black	-0.428373	-0.299233	-0.526591	-0.704255	-0.0832987	-0.0149688	-0.544832	-0.287493	-0.19017	-0.568734	-0.885262	-0.682481	0.0441103	0.0437559	0.155821	0.0186745	-0.215342	0.48042	0.712246	0.424513	0.714614	0.807676	0.536404	0.698776	0.0939445	0.00927071	0.141577	-0.112019	0.112019
XM_005174713	NO	black	0.105991	0.0619109	-0.176882	-0.265492	-0.215988	0.0293066	-0.247001	-0.309649	-0.43275	-0.340827	-0.530344	-0.529844	-0.237351	-0.0793844	0.223212	0.0226127	-0.102681	0.547933	0.0516744	0.20972	0.422959	0.398058	0.0866739	0.373977	0.275093	-0.0562868	-0.22249	-0.245862	0.245862
XM_005174735	NO	black	-0.269462	0.000300319	-0.689578	-0.804645	-0.37395	-0.288031	-0.76928	-0.364022	-0.36153	-0.424687	-0.94535	-0.628725	-0.0460528	-0.0679107	0.267837	-0.0602309	-0.167925	0.471195	0.50479	0.622136	0.904296	0.910155	0.396778	0.671911	0.241309	-0.136682	0.063294	-0.190488	0.190488
XM_005174743	NO	black	0.140767	0.420369	-0.265681	-0.57014	-0.642326	-0.212011	-0.438829	-0.425624	-0.435457	-0.265694	-0.710844	-0.702311	-0.0182718	0.0404083	0.179963	-0.232507	-0.107489	0.35374	0.00849441	0.569983	0.665545	0.525516	0.26428	0.48801	0.468232	-0.0780123	0.150702	-0.233879	0.233879
XM_005174788	NO	black	-0.322602	-0.234855	-0.176322	-0.193551	-0.231597	0.0120259	-0.306325	-0.472098	-0.186081	-0.346258	-0.666948	-0.543204	0.342892	0.384006	-0.0481367	0.311479	0.0601214	0.307346	0.388932	0.461025	0.53781	0.389432	0.0681553	0.241038	-0.0413088	-0.208401	0.233646	-0.194942	0.194942
XM_020037129	NO	black	-0.159537	-0.193853	-0.360938	-0.379301	-0.160531	-0.0502949	-0.418732	-0.301771	-0.476333	-0.373237	-0.686435	-0.529078	-0.200038	-0.267113	0.153899	0.130854	0.0397685	0.516288	0.523464	0.353143	0.59924	0.555352	0.326993	0.386765	-0.103193	-0.152984	-0.0511178	-0.438022	0.438022
XR_002194907	NO	black	0.195874	-0.0696199	0.603834	0.703513	0.522407	0.493701	0.806783	0.485559	0.483635	0.165652	0.86229	0.486773	-0.0262289	0.0112869	-0.425229	-0.00188945	-0.0617946	-0.409404	-0.384211	-0.767048	-0.920364	-0.726388	-0.189583	-0.364484	-0.00427128	0.467804	-0.0964789	0.345013	-0.345013
XM_005174810	NO	black	-0.268137	-0.36167	-0.124999	-0.0878202	0.136716	0.0738857	-0.138652	-0.493746	-0.503727	-0.246746	-0.459885	-0.433304	0.153596	0.007452	-0.00304071	0.426671	0.378263	0.171747	0.402705	0.356206	0.305648	0.158078	0.240099	0.0390199	-0.367592	-0.422174	0.0372757	-0.525426	0.525426
XM_005174868	NO	black	0.104262	0.0334013	0.204538	0.133885	-0.0110389	0.0292438	0.326542	0.212813	0.177535	0.24438	0.476816	0.37723	-0.156619	-0.04082	-0.0207443	-0.0731991	-0.00513577	0.0843322	-0.202743	-0.432558	-0.411605	-0.32502	-0.0877754	-0.184385	0.0199048	0.221304	0.199639	0.1175	-0.1175
NM_001308989	NO	black	0.124698	-0.0491946	0.494702	0.553609	0.441152	0.37298	0.760602	0.448325	0.314718	0.221961	0.850212	0.49577	-0.177159	-0.139923	-0.113239	-0.0379404	-0.0134404	-0.357818	-0.463729	-0.618376	-0.892682	-0.709876	-0.164847	-0.348401	-0.0315732	0.280554	-0.192512	0.194295	-0.194295
XM_011298089	NO	black	0.0209036	-0.161295	0.238146	0.460957	0.168377	0.0639228	0.499749	0.0731701	-0.0649548	0.366599	0.731733	0.62174	-0.226749	-0.207626	0.206803	0.303843	0.435736	-0.461971	-0.274112	-0.464683	-0.652499	-0.599249	-0.231502	-0.488352	-0.32088	-0.0904677	-0.333513	-0.105335	0.105335
XM_005174971	NO	black	-0.227543	-0.179899	0.0149934	-0.102512	0.399446	-0.0576575	0.0684492	0.312663	0.141408	0.24689	0.283279	0.295515	-0.013193	-0.209463	0.000142592	-0.192289	0.0032658	-0.294698	-0.0736707	-0.00909363	-0.243741	-0.180561	0.307856	-0.138747	-0.123673	0.0516597	-0.0926614	0.0769952	-0.0769952
XM_005175025	NO	black	0.286363	0.130712	0.501239	0.671279	0.284931	0.27714	0.702299	0.369181	0.373197	0.300484	0.888017	0.590368	0.0278796	0.0105031	-0.274406	0.0812815	0.0816374	-0.383493	-0.506911	-0.628308	-0.836766	-0.728277	-0.420422	-0.480422	-0.0421724	0.22314	0.00641966	0.186985	-0.186985
XM_011292164	NO	black	-0.108238	0.235894	-0.481383	-0.522518	-0.58438	-0.454839	-0.724793	-0.212821	-0.0278281	-0.127143	-0.689086	-0.286149	0.163007	0.12308	0.211623	-0.0916069	-0.18781	0.279697	0.295341	0.493989	0.795283	0.679262	-0.0968049	0.347826	0.16074	-0.146857	0.243185	0.0529507	-0.0529507
XR_002194123	NO	black	0.269533	0.17605	0.13794	0.271944	-0.00563754	-0.143852	0.257402	0.453221	0.250307	0.489364	0.683789	0.642788	-0.349207	-0.15706	0.138865	-0.358433	0.000899072	-0.528224	-0.504023	-0.205814	-0.483351	-0.458677	-0.231607	-0.397013	-0.0187388	0.0478228	-0.417123	0.370376	-0.370376
XM_005175098	NO	black	-0.277331	-0.202548	-0.225737	-0.321045	-0.220116	-0.007244	-0.255155	-0.436171	-0.424799	-0.270408	-0.573463	-0.548599	-0.0401848	0.10129	0.0303111	0.137665	0.119526	0.264453	0.187304	0.395511	0.435859	0.329505	0.284297	0.280638	0.0674236	-0.250445	-0.0607782	-0.376542	0.376542
XR_002194145	NO	black	-0.387795	-0.4959	-0.0555615	-0.0311066	0.381367	0.168779	-0.102821	-0.243982	-0.171709	-0.262475	-0.354674	-0.354233	0.165773	0.0984097	-0.114441	0.28316	0.100267	0.0749984	0.492469	0.255922	0.178147	0.131998	0.146126	0.072531	-0.372705	-0.270645	0.015644	-0.223717	0.223717
XM_020035302	NO	black	0.0866485	-0.023775	0.512245	0.423857	0.465182	0.418642	0.743163	0.561799	0.623906	0.156412	0.806677	0.493073	0.0874559	0.075391	-0.298172	-0.145078	-0.204952	-0.323124	-0.401663	-0.733893	-0.867674	-0.61595	-0.0136535	-0.219632	0.138335	0.548558	0.143853	0.457245	-0.457245
XM_005175155	NO	black	-0.305598	-0.150049	-0.631462	-0.877475	-0.330462	-0.15901	-0.489006	-0.289035	-0.254883	-0.469657	-0.76191	-0.565805	0.0262299	-0.0631027	0.473134	-0.0322482	-0.0966973	0.249741	0.594021	0.477598	0.649193	0.758256	0.491055	0.682913	0.102739	-0.0942233	0.158997	-0.120072	0.120072
XM_005175228	NO	black	-0.15112	-0.106571	-0.194379	-0.0961414	-0.148725	0.0310257	-0.2557	-0.286749	-0.432699	-0.346653	-0.554988	-0.518305	-0.108053	-0.187166	0.226315	0.19805	-0.00709311	0.285745	0.295662	0.45334	0.433744	0.334119	-0.101197	0.235317	-0.156602	-0.377687	-0.182632	-0.448537	0.448537
XM_005175283	NO	black	-0.22273	-0.220165	-0.515558	-0.356073	-0.111375	0.0815649	-0.389764	-0.389668	-0.456079	-0.635109	-0.75585	-0.678306	-0.0881324	-0.236505	0.208485	0.315856	-0.0221246	0.278126	0.682648	0.463691	0.587377	0.676139	0.111535	0.570948	-0.0755002	-0.227695	-0.135837	-0.382697	0.382697
XM_020036060	NO	black	-0.0453911	-0.183708	0.05204	0.000864248	-0.130429	-0.0273638	0.314909	-0.0567793	0.273138	0.163351	0.385984	0.379795	0.198805	0.330756	0.19645	0.223517	0.272689	-0.296094	0.0138059	-0.342065	-0.347168	-0.262188	-0.100109	-0.182026	-0.128794	0.0688714	0.267785	0.215984	-0.215984
XM_005175329	NO	black	0.493146	0.480889	0.614501	0.59642	-0.213347	-0.244844	0.231812	0.12803	0.111535	0.711114	0.611497	0.541362	-0.104256	0.150517	-0.0838941	-0.200238	0.197023	-0.226166	-0.69563	-0.223759	-0.354473	-0.690438	-0.54504	-0.752384	-0.113714	-0.1094	-0.0360857	0.0588015	-0.0588015
XM_020036256	NO	black	0.270382	0.164277	0.590716	0.698519	0.131765	-0.061681	0.472806	0.269083	0.321505	0.690062	0.870278	0.803974	0.019435	0.169137	-0.185067	-0.013986	0.26061	-0.373899	-0.63587	-0.544522	-0.672105	-0.827865	-0.423575	-0.802616	-0.20984	0.0269909	-0.0268538	0.220656	-0.220656
XM_005175408	NO	black	0.198494	-0.0348733	0.586278	0.567995	0.326393	0.323942	0.799576	0.344179	0.367628	0.329076	0.910362	0.562465	-0.0126646	0.111908	-0.185051	-0.0171901	0.13377	-0.440612	-0.447023	-0.629535	-0.906696	-0.809138	-0.126803	-0.476598	-0.0926398	0.293945	0.0238221	0.268611	-0.268611
XR_002194485	NO	black	0.335858	0.400239	0.381823	0.142172	0.0934775	0.156532	0.445248	0.465445	0.459713	0.207824	0.553949	0.323274	0.0226241	0.0117287	-0.263787	-0.441214	-0.266019	-0.398286	-0.532558	-0.470544	-0.532476	-0.396999	0.0374982	-0.0852929	0.403316	0.510519	0.221965	0.402441	-0.402441
XM_005175448	NO	black	-0.390057	-0.351435	-0.530094	-0.551502	-0.10206	0.151349	-0.245152	-0.471202	-0.429048	-0.638007	-0.717378	-0.700878	0.0397471	0.0090803	0.227451	0.275819	0.0625978	0.115735	0.583656	0.474528	0.475712	0.608946	0.474931	0.636824	0.0726903	-0.125043	-0.0523256	-0.29393	0.29393
XM_005175451	NO	black	0.13224	-0.00658133	0.586745	0.594106	0.282134	0.122146	0.640174	0.268507	0.275616	0.53678	0.909268	0.687687	-0.0459411	0.107883	-0.133589	0.00655329	0.281213	-0.420217	-0.477524	-0.553453	-0.81288	-0.843473	-0.144829	-0.654344	-0.24274	0.119126	-0.016361	0.200636	-0.200636
XM_011293997	NO	black	-0.275729	-0.473986	0.264041	0.549464	0.547948	0.279661	0.564107	0.0909361	0.164575	0.187886	0.650311	0.534483	0.10273	0.0622935	-0.116949	0.532353	0.356641	-0.204164	-0.127583	-0.522529	-0.691856	-0.572313	-0.246363	-0.460263	-0.380136	-0.0134566	-0.14016	0.0116617	-0.0116617
XM_005175489	NO	black	-0.0148158	0.0396733	-0.189215	-0.486739	-0.417757	-0.188532	-0.303952	-0.600059	-0.615085	-0.133288	-0.580749	-0.605625	0.0789981	0.105412	0.180482	0.0160166	0.249388	0.321245	0.239872	0.613545	0.514177	0.283169	0.376561	0.206705	-0.00982203	-0.358179	0.288755	-0.460397	0.460397
XM_005175516	NO	black	-0.138723	-0.0852578	0.0163015	-0.238497	-0.129844	0.0250298	-0.257679	-0.396902	-0.108595	-0.269518	-0.617724	-0.596955	0.585845	0.415665	-0.226738	0.134479	0.0158917	0.292009	0.340342	0.47018	0.486425	0.276947	0.217273	0.176263	-0.0223733	-0.132446	0.526037	-0.137176	0.137176
XR_002194659	NO	black	-0.399566	-0.30578	-0.578879	-0.548092	-0.0526713	0.218779	-0.30106	-0.26063	-0.261415	-0.768645	-0.779261	-0.734711	-0.0880296	-0.111495	0.149048	0.172915	-0.1931	0.290485	0.615007	0.354228	0.519019	0.758786	0.426307	0.801071	0.192821	0.0553815	-0.122266	-0.142371	0.142371
XM_011294503	NO	black	-0.491295	-0.211862	-0.281512	-0.183125	0.106316	0.116074	-0.380189	-0.2745	-0.117	-0.470259	-0.7058	-0.576619	0.211761	0.174614	-0.301208	0.262445	-0.15113	0.335876	0.424368	0.410964	0.53044	0.523766	0.117824	0.393502	0.0392333	-0.0960396	0.132764	-0.174629	0.174629
XR_225450	NO	black	0.0884385	-0.065794	0.589561	0.686507	0.349415	0.278561	0.781342	0.315986	0.369988	0.394595	0.945907	0.666823	0.0902263	0.112764	-0.12597	0.135688	0.215643	-0.512863	-0.476625	-0.617788	-0.921654	-0.862817	-0.273661	-0.594576	-0.211914	0.161036	-0.0371	0.219095	-0.219095
XM_005175625	NO	black	0.0526292	-0.113725	0.516503	0.522413	0.423468	0.468276	0.829188	0.373916	0.529423	0.1215	0.82406	0.439361	0.205356	0.216991	-0.303426	0.0579823	-0.0171572	-0.412812	-0.343629	-0.619629	-0.910632	-0.700483	-0.0989025	-0.299182	0.00885629	0.3767	0.173246	0.371388	-0.371388
XR_891566	NO	black	-0.246217	-0.168635	-0.358278	-0.498393	-0.266935	-0.0940771	-0.449932	-0.713821	-0.670085	-0.374802	-0.81616	-0.741428	0.0569816	0.101723	0.118022	0.271557	0.240292	0.508347	0.475702	0.586217	0.684221	0.537388	0.386521	0.387585	-0.0151301	-0.330875	0.146806	-0.507249	0.507249
XM_020037525	NO	black	0.228718	0.120221	0.424429	0.377759	0.304517	0.304084	0.678162	0.407937	0.357636	0.201632	0.779377	0.422133	-0.106746	-0.0233768	-0.165119	-0.155876	-0.0846142	-0.414907	-0.553089	-0.568721	-0.802503	-0.60928	-0.168306	-0.236046	0.196513	0.331712	-0.0729831	0.27052	-0.27052
XM_011294931	NO	black	-0.100459	-0.119344	-0.286807	-0.707048	-0.274626	0.0856473	-0.262293	-0.270556	-0.241376	-0.533188	-0.727585	-0.740098	0.136812	0.0461659	0.281532	-0.112198	-0.228545	0.469625	0.389515	0.345283	0.517995	0.582805	0.545564	0.667029	0.309044	0.102196	0.228814	-0.154125	0.154125
XM_020037649	NO	black	-0.143966	-0.220615	-0.108891	0.0595285	0.173011	-0.094669	0.0792989	-0.0276211	-0.151507	0.275456	0.356898	0.406954	-0.272354	-0.125572	0.0297833	0.153451	0.273595	-0.176402	-0.289544	-0.230492	-0.271637	-0.197959	-0.0206987	-0.208209	0.039483	-0.0928729	-0.400671	-0.0942129	0.0942129
XM_020037837	NO	black	-0.0194902	-0.280064	0.353792	0.499321	0.497231	0.394605	0.695116	0.262842	0.121715	0.113693	0.69931	0.36983	-0.0890062	-0.135336	-0.0245028	0.158457	0.194801	-0.443482	-0.24334	-0.389201	-0.783922	-0.634533	-0.0280535	-0.335982	-0.246656	0.0594729	-0.315201	0.0724007	-0.0724007
XR_891614	NO	black	0.114019	0.150904	0.220669	0.619112	0.296911	0.260785	0.42342	0.554315	0.484483	0.136921	0.679534	0.499037	-0.220933	-0.101455	-0.40228	-0.0826141	-0.273979	-0.147665	-0.403267	-0.500715	-0.614177	-0.384384	-0.41216	-0.20686	0.149804	0.363853	-0.246539	0.439684	-0.439684
XR_002194895	NO	black	0.282893	0.0398398	0.735746	0.71071	0.374219	0.346961	0.790164	0.320665	0.365282	0.354995	0.898644	0.525326	0.080797	0.136164	-0.306445	0.0151348	0.10722	-0.39384	-0.493712	-0.656809	-0.894819	-0.868648	-0.254433	-0.558234	-0.104065	0.268436	0.0618423	0.25581	-0.25581
XM_005175769	NO	black	0.44369	0.307841	0.822943	0.563636	-0.00803773	-0.000826599	0.539916	0.164174	0.101316	0.645387	0.756893	0.507344	-0.0960168	0.0931894	-0.114679	-0.195737	0.235227	-0.208654	-0.654185	-0.485492	-0.619881	-0.86129	-0.205326	-0.701414	-0.109584	0.117346	0.115998	0.0396855	-0.0396855
XM_005175770	NO	black	0.175547	0.000849641	0.517696	0.612955	0.316525	0.262959	0.719499	0.383504	0.384825	0.363224	0.921835	0.64593	0.0780304	0.0355042	-0.214811	0.0629306	0.139987	-0.538139	-0.474705	-0.570716	-0.870395	-0.776756	-0.244183	-0.518917	-0.100282	0.232549	-0.0150933	0.216891	-0.216891
XM_005175815	NO	black	0.445949	0.420981	0.164616	0.215549	-0.0942084	-0.00135354	0.333249	0.597491	0.456195	0.261783	0.627275	0.47155	-0.226946	-0.215687	-0.0183992	-0.480185	-0.278623	-0.35365	-0.428283	-0.355275	-0.485355	-0.335256	-0.206773	-0.14641	0.191423	0.291469	-0.0365532	0.380698	-0.380698
XM_011295684	NO	black	-0.0887344	0.103219	-0.634493	-0.571075	-0.356478	-0.232915	-0.722831	-0.224085	-0.218969	-0.426782	-0.833568	-0.560819	-0.00625743	-0.0715563	0.120204	-0.0717985	-0.311636	0.378329	0.420764	0.605706	0.828572	0.853498	0.0533185	0.605452	0.294956	-0.084814	-0.0337593	-0.0462382	0.0462382
XM_005175967	NO	black	0.29169	0.116737	0.759109	0.842631	0.289646	0.184984	0.55532	0.23663	0.169467	0.493187	0.750047	0.526013	-0.0119883	0.0161754	-0.411013	0.035915	0.172651	-0.179159	-0.531925	-0.542266	-0.663761	-0.818951	-0.295899	-0.69826	-0.177608	0.141452	-0.030541	0.0550535	-0.0550535
XM_011296393	NO	black	-0.0390955	0.0116328	-0.323775	-0.65902	-0.441614	-0.324512	-0.609868	-0.610789	-0.481929	-0.191348	-0.790432	-0.564674	0.081304	0.200563	0.331237	0.00817	0.130457	0.380925	0.452382	0.507001	0.779421	0.578954	0.311568	0.345859	0.0256309	-0.251948	0.232565	-0.223377	0.223377
XM_020039120	NO	black	0.446768	0.272918	0.00809273	0.151019	0.126704	0.0603118	0.201388	0.612841	0.274629	0.128668	0.487205	0.339538	-0.523966	-0.402263	-0.0179883	-0.527782	-0.408078	-0.145675	-0.376514	-0.313218	-0.389421	-0.15765	-0.144195	0.0114184	0.291203	0.314331	-0.444462	0.432495	-0.432495
XM_011296657	NO	black	-0.362528	-0.3456	-0.399274	-0.482747	-0.185871	0.161869	-0.259692	-0.448111	-0.336894	-0.660772	-0.776584	-0.730918	0.152524	0.0456511	0.238677	0.320656	0.0334484	0.336935	0.727011	0.412555	0.543152	0.613801	0.427897	0.59811	-0.0729116	-0.112288	0.168009	-0.332242	0.332242
XM_020039064	NO	black	0.264841	0.195967	0.471878	0.62575	0.151801	0.209649	0.612145	0.295517	0.33674	0.325502	0.790331	0.540061	-0.0896143	0.177647	-0.165875	-0.0452318	0.0480918	-0.420354	-0.5899	-0.473988	-0.729986	-0.679721	-0.382962	-0.451349	0.0447137	0.201912	-0.131175	0.364776	-0.364776
XM_005176073	NO	black	-0.33203	-0.548262	-0.0178084	0.199789	0.373283	0.062058	0.372069	0.124543	0.427896	0.213138	0.569046	0.619601	0.22938	0.343208	0.15706	0.348154	0.319431	-0.42938	0.0326379	-0.375177	-0.548245	-0.392984	-0.13442	-0.367887	-0.412406	-0.102267	-0.0788055	0.294497	-0.294497
XM_011296713	NO	black	-0.167034	-0.160141	-0.436698	-0.251555	-0.168012	-0.0703636	-0.504045	-0.429799	-0.375398	-0.420276	-0.716889	-0.493802	0.00390636	-0.019365	0.0480827	0.327513	-0.0054285	0.309082	0.549587	0.421627	0.651702	0.621672	-0.0797022	0.376364	-0.0292372	-0.207089	-0.0371873	-0.251453	0.251453
XM_005176312	NO	black	0.309745	-0.110763	0.688992	0.511108	0.326112	0.38536	0.829287	0.212522	0.246999	0.266218	0.79378	0.36726	0.129463	0.157889	-0.232017	0.018245	0.225611	-0.392302	-0.35393	-0.58614	-0.848951	-0.832771	-0.0200015	-0.485201	-0.160897	0.224987	0.150918	0.0684067	-0.0684067
XM_005176308	NO	black	-0.115388	-0.244113	-0.183761	-0.255026	0.0649997	0.090681	-0.117155	-0.284732	-0.405185	-0.250388	-0.377783	-0.481673	-0.307667	-0.0391699	-0.0453207	-0.0429787	0.0598172	0.289027	0.136595	0.251461	0.229008	0.218147	0.39308	0.265669	0.0900014	-0.144953	-0.24459	-0.235195	0.235195
XM_005176356	NO	black	0.0377498	0.267572	-0.539081	-0.685558	-0.557133	-0.323686	-0.720205	-0.250121	-0.335124	-0.307654	-0.833881	-0.583434	-0.154955	-0.134097	0.231643	-0.306753	-0.253959	0.308535	0.287628	0.615195	0.855874	0.79331	0.306377	0.595618	0.36837	-0.0635622	-0.0138235	-0.075051	0.075051
XM_011297824	NO	black	0.290199	0.0357937	0.662339	0.579674	0.301374	0.31969	0.825054	0.396368	0.395293	0.366148	0.934842	0.557211	0.0388427	0.087089	-0.166216	-0.109228	0.087252	-0.527179	-0.521102	-0.621912	-0.930306	-0.863401	-0.129518	-0.504881	-0.0641799	0.292472	0.0272523	0.26912	-0.26912
XM_020039848	NO	black	0.0808847	-0.170705	0.220412	0.4438	0.202114	0.0765954	0.379086	0.310796	0.302427	0.250346	0.58543	0.559593	0.00344211	-0.156094	0.0188625	0.137422	0.141038	-0.443646	-0.0919804	-0.455197	-0.518442	-0.455319	-0.321901	-0.403359	-0.3482	-0.0468793	-0.094292	0.0879539	-0.0879539
XM_005176414	NO	black	-0.0464571	0.18046	-0.491131	-0.71206	-0.44893	-0.30636	-0.710703	-0.444851	-0.420989	-0.295791	-0.886391	-0.669543	-0.0592478	0.0694944	0.134829	-0.190035	-0.11101	0.428382	0.243761	0.608408	0.864319	0.751427	0.37559	0.548264	0.376283	-0.120483	0.0302541	-0.131736	0.131736
XM_005176506	NO	black	-0.0517289	0.0548505	-0.467409	-0.667635	-0.404706	-0.257343	-0.656408	-0.427676	-0.382196	-0.352404	-0.916141	-0.737045	0.123872	0.096229	0.204171	-0.140721	-0.123152	0.492198	0.401362	0.745631	0.855612	0.703969	0.300728	0.490921	0.150111	-0.287896	0.170726	-0.230742	0.230742
XM_020039889	NO	black	-0.0361362	-0.0793083	0.155895	-0.0757036	-0.198745	0.0231305	-0.0473052	-0.433224	-0.407416	-0.125237	-0.30603	-0.341889	0.20041	0.0265747	0.265507	0.336932	0.225549	0.306696	0.249127	0.134543	0.224222	0.0573596	-0.0078386	0.0252382	-0.189905	-0.175418	0.208343	-0.446114	0.446114
XM_005176615	NO	black	-0.263934	-0.0753325	-0.613748	-0.661937	-0.313946	-0.169369	-0.668802	-0.404916	-0.34438	-0.519504	-0.921357	-0.640749	0.0519411	-0.0898447	0.213261	0.162605	-0.111566	0.451893	0.615145	0.468133	0.837231	0.875385	0.236454	0.654137	0.147799	-0.113799	0.105443	-0.261586	0.261586
XM_020039960	NO	black	0.0191891	-0.0815217	0.156579	0.341665	0.185603	0.00210585	0.280975	0.0739835	0.371171	0.27642	0.513676	0.505967	0.197028	0.318929	-0.254599	0.221371	0.172596	-0.373378	-0.18896	-0.384878	-0.429007	-0.379162	-0.401127	-0.373385	-0.0906396	0.0466023	0.132295	0.31444	-0.31444
XM_011297946	NO	black	-0.371404	-0.317697	-0.219979	0.372608	0.317678	0.0907355	0.102562	0.0934093	-0.0290356	-0.0626137	0.262525	0.374232	-0.129976	-0.414757	0.145502	0.601169	0.197093	-0.186981	0.205003	-0.180644	-0.241227	-0.0425308	-0.428065	-0.126385	-0.408212	-0.205744	-0.38347	-0.169991	0.169991
XM_005176696	NO	black	-0.0642919	-0.0693572	-0.511684	-0.774828	-0.360244	-0.220383	-0.565272	-0.386392	-0.359211	-0.376295	-0.789342	-0.54941	-0.0482418	-0.0265868	0.393702	-0.0298212	-0.0207375	0.336606	0.553972	0.375836	0.728773	0.726229	0.404831	0.555336	0.0884232	-0.108305	0.122789	-0.199883	0.199883
XM_005176698	NO	black	-0.174749	-0.0667736	-0.471402	-0.767204	-0.217095	0.0376639	-0.44104	-0.241958	-0.260425	-0.586094	-0.840469	-0.756161	-0.02763	-0.0345723	0.11312	-0.147656	-0.28757	0.345112	0.444969	0.403174	0.654753	0.769088	0.570006	0.77887	0.39255	0.140572	0.109248	-0.147919	0.147919
XM_020039990	NO	black	-0.253254	-0.138968	-0.34	-0.622602	-0.32194	-0.112507	-0.385234	-0.442661	-0.23029	-0.345404	-0.737969	-0.60112	0.231458	0.34194	0.268326	0.0128045	0.0187088	0.129175	0.344493	0.543863	0.598682	0.501464	0.299861	0.41556	0.0732834	-0.241515	0.197601	-0.0790167	0.0790167
XM_005176822	NO	black	0.329195	0.322463	0.348416	0.202391	0.0228848	-0.000513046	0.395068	0.525384	0.454116	0.387553	0.699032	0.551328	-0.0015613	-0.113545	0.0251739	-0.377751	-0.170959	-0.433375	-0.517443	-0.461741	-0.575803	-0.474785	-0.112311	-0.260913	0.190554	0.345753	0.0207962	0.366788	-0.366788
XM_020040007	NO	black	0.20946	0.0407045	0.014404	-0.0156983	0.218742	0.0635129	0.210566	0.561691	0.387308	0.124454	0.398854	0.34849	0.0374949	-0.233111	-0.108932	-0.316359	-0.193774	-0.188163	-0.222448	-0.283713	-0.344884	-0.175073	0.115207	-0.0705423	0.0769698	0.223741	-0.0027068	0.234264	-0.234264
XM_005176862	NO	black	0.120324	0.0635252	0.30764	0.794102	0.200219	0.174378	0.484286	0.219749	0.159815	0.296632	0.723108	0.573513	-0.210611	-0.0469037	-0.199898	0.215913	0.133131	-0.287789	-0.559756	-0.455843	-0.638604	-0.587511	-0.559572	-0.485205	-0.0333581	0.0218934	-0.443704	0.12742	-0.12742
XM_020040037	NO	black	0.0616802	0.264867	-0.0555315	0.00720049	-0.00750415	-0.244486	0.0165553	0.438589	0.302394	0.300513	0.376016	0.432617	-0.0434529	-0.265114	0.270618	-0.22986	-0.18102	-0.00461906	-0.31912	-0.0811935	-0.214728	-0.147648	-0.390487	-0.174621	-0.0362171	-0.0949251	-0.0271648	0.127006	-0.127006
XM_020040028	NO	black	-0.279976	-0.28694	-0.056261	0.301438	0.365317	0.141844	0.165784	0.40369	0.32075	0.0686242	0.389895	0.48292	-0.114333	-0.200592	-0.164189	0.157602	-0.0165257	-0.364452	-0.025745	-0.331481	-0.347601	-0.141367	-0.0671157	-0.136089	-0.137168	0.150593	-0.343773	0.171031	-0.171031
XM_005176892	NO	black	0.000217404	0.236926	-0.551925	-0.600549	-0.432552	-0.235858	-0.661032	-0.319	-0.311263	-0.403921	-0.8288	-0.623445	-0.0653502	-0.0808261	0.0832629	-0.108114	-0.260957	0.556786	0.292501	0.486461	0.800303	0.800694	0.148496	0.618369	0.402359	-0.0733743	0.116192	-0.114037	0.114037
XM_005176910	NO	black	-0.437564	-0.411983	-0.527502	-0.624358	-0.0267691	-0.0176742	-0.385963	-0.361321	-0.348316	-0.428235	-0.677776	-0.537695	0.0367026	-0.0150055	0.159923	0.153773	0.0747027	0.321621	0.465865	0.419391	0.519621	0.585158	0.622606	0.505904	0.0580067	-0.17434	-0.0369061	-0.277518	0.277518
XM_011298035	NO	black	0.299178	0.0897442	0.163791	-0.14408	0.0722967	0.0897813	-0.0876691	-0.207993	-0.549171	-0.0860453	-0.287036	-0.392294	-0.339868	-0.342255	-0.217299	-0.14135	0.0216069	0.545562	0.00402466	-0.156777	0.203449	0.11444	0.45138	0.157231	0.215189	0.193366	-0.0110332	-0.462891	0.462891
XM_005176977	NO	black	0.0918074	0.105549	-0.170881	-0.597457	-0.432048	0.034743	-0.249127	-0.388051	-0.148428	-0.435426	-0.656295	-0.707748	0.143381	0.386709	0.0568778	-0.176336	-0.141153	0.111299	0.341935	0.38831	0.520678	0.500984	0.413222	0.565388	0.373943	0.195776	0.336927	0.0881374	-0.0881374
XM_020040069	NO	black	0.0109423	-0.1077	-0.336641	-0.418618	-0.112203	-0.0957052	-0.177394	-0.178157	-0.0437304	-0.225652	-0.309187	-0.237534	0.264524	0.0544934	0.162665	0.0569821	0.0478507	0.0998711	0.414763	0.210458	0.258088	0.292576	0.112952	0.221667	-0.151106	-0.258546	0.407154	-0.131488	0.131488
XM_011298078	NO	black	-0.289756	-0.256015	-0.596744	-0.61347	-0.304456	-0.103312	-0.503748	-0.326514	-0.201381	-0.484314	-0.767438	-0.550422	0.00296299	0.142652	0.422279	0.0654224	-0.0768529	0.220997	0.594141	0.525439	0.665903	0.723198	0.304635	0.568018	0.0253592	-0.142374	-0.157005	-0.00404072	0.00404072
XR_002195580	NO	black	0.155558	-0.0969381	0.594887	0.591521	0.37661	0.308949	0.799012	0.377003	0.337503	0.374554	0.936498	0.597056	0.011359	0.0199322	-0.1535	-0.00198917	0.16323	-0.529036	-0.457494	-0.599616	-0.932215	-0.855195	-0.131127	-0.534534	-0.169074	0.211429	-0.0583473	0.201101	-0.201101
XM_005177110	NO	black	-0.0756094	0.138086	-0.526493	-0.519353	-0.395092	-0.218418	-0.679214	-0.33754	-0.245767	-0.396716	-0.819654	-0.545969	-0.0653627	0.0451494	0.0527101	0.0147049	-0.19078	0.404197	0.405142	0.406078	0.806627	0.798994	0.0385881	0.553956	0.271388	-0.0478908	0.035349	-0.0484312	0.0484312
XM_011298100	NO	black	-0.485029	-0.388485	-0.745778	-0.72932	-0.0993732	-0.0289043	-0.551017	-0.31457	-0.252113	-0.61966	-0.824811	-0.563864	-0.0298572	-0.0817576	0.223047	0.211208	-0.119558	0.35552	0.748598	0.384021	0.677662	0.885401	0.445667	0.750862	0.114607	-0.0222524	-0.0036581	-0.137282	0.137282
XM_005177137	NO	black	0.203648	0.0847537	0.412299	0.74888	0.318384	0.0814467	0.432837	0.47231	0.501617	0.479991	0.858842	0.797425	-0.0979751	0.0755361	-0.324664	-0.0419193	-0.0103984	-0.256861	-0.531786	-0.624913	-0.690393	-0.644712	-0.47161	-0.59185	-0.0719442	0.202908	-0.213743	0.453527	-0.453527
XM_005177226	NO	black	0.483754	0.41606	0.454222	0.345296	0.0969017	0.0988279	0.494495	0.718849	0.475205	0.363518	0.749436	0.478051	-0.0539891	-0.278203	-0.146432	-0.529488	-0.306249	-0.323429	-0.593401	-0.368755	-0.643068	-0.576667	-0.164858	-0.317536	0.133182	0.277453	0.0976825	0.219926	-0.219926
XM_005177234	NO	black	-0.25746	-0.0491887	-0.675411	-0.526868	-0.210429	-0.204682	-0.752117	-0.351531	-0.343255	-0.47245	-0.921802	-0.593232	-0.00477408	-0.104093	0.0812989	0.126996	-0.142493	0.531284	0.549225	0.554777	0.873079	0.877245	0.161819	0.569791	0.108872	-0.208135	-0.0388499	-0.202209	0.202209
XM_005177236	NO	black	0.274835	0.161883	0.684023	0.744212	0.163489	0.0994019	0.633895	0.308597	0.362581	0.57626	0.927929	0.73015	-0.0420521	0.166483	-0.173595	-0.0246399	0.188645	-0.47913	-0.62152	-0.598806	-0.793579	-0.875111	-0.4271	-0.712902	-0.152408	0.151424	-0.0471706	0.273075	-0.273075
XM_020040138	NO	black	-0.324001	-0.262019	-0.217604	-0.180592	-0.153989	-0.0562747	-0.277216	-0.67738	-0.533046	-0.251761	-0.545161	-0.407742	-0.175702	0.120745	0.197398	0.437909	0.362645	0.313024	0.48002	0.160007	0.44237	0.350303	0.201728	0.209261	-0.180263	-0.208837	-0.0670624	-0.334826	0.334826
XM_005177268	NO	black	-0.158026	-0.0950088	-0.0428243	0.166852	-0.0528398	0.0863735	-0.110533	-0.496334	-0.145074	-0.213336	-0.327629	-0.304425	0.203385	0.526296	-0.180313	0.421696	0.237915	-0.00684448	0.160145	0.181031	0.241142	0.129121	-0.203683	0.010885	-0.0633374	-0.161881	-0.103276	0.024292	-0.024292
XM_005177279	NO	black	0.031145	-0.226366	0.48045	0.528549	0.341137	0.157863	0.61773	0.228456	0.245289	0.400988	0.741275	0.537788	0.137164	0.147687	0.0542841	0.076279	0.286805	-0.495174	-0.265476	-0.249822	-0.719196	-0.789375	-0.182915	-0.637482	-0.491797	-0.151709	-0.0194397	0.1293	-0.1293
XM_005177286	NO	black	-0.338688	-0.204679	-0.27256	-0.433898	0.0403512	0.0860861	-0.276601	-0.375214	-0.418742	-0.45439	-0.682112	-0.70811	0.0133657	-0.0297847	0.105196	0.131696	0.0121949	0.351134	0.387026	0.484232	0.468591	0.453039	0.36971	0.441465	-0.00372941	-0.207361	-0.00509257	-0.379415	0.379415
XM_005177329	NO	black	-0.0931667	0.152136	-0.314593	-0.372427	-0.297179	-0.0816955	-0.499374	-0.416732	-0.427307	-0.362761	-0.802425	-0.701414	0.0602777	0.047212	-0.135963	-0.00040023	-0.109289	0.384168	0.200849	0.58143	0.70353	0.57539	0.227219	0.435368	0.286692	-0.133908	0.0989464	-0.30207	0.30207
XM_005177376	NO	black	-0.383032	-0.320167	-0.556332	-0.520724	-0.00266408	0.0804298	-0.500516	-0.300745	-0.255421	-0.663012	-0.869067	-0.680639	0.00402922	-0.0554996	0.0973005	0.193823	-0.191364	0.416529	0.758809	0.419245	0.678336	0.810164	0.351657	0.68396	0.0365739	-0.0228395	0.00336547	-0.120343	0.120343
XM_005177377	NO	black	0.319599	0.312838	0.515333	0.738673	0.094448	0.021129	0.45381	0.347337	0.385512	0.51555	0.81155	0.643462	0.0149921	0.124298	-0.260529	-0.0708298	0.0393922	-0.492991	-0.61076	-0.361403	-0.640682	-0.720265	-0.678273	-0.639458	-0.0849575	0.0441171	-0.0891746	0.318876	-0.318876
XM_005177441	NO	black	-0.155858	-0.250388	-0.205522	-0.185729	-0.121299	0.0721483	-0.318635	-0.396619	-0.188867	-0.470401	-0.669578	-0.557267	0.203289	0.199641	0.115649	0.31937	-0.0131212	0.344188	0.689491	0.325078	0.535429	0.48271	-0.0111994	0.323584	-0.213124	-0.142129	0.149402	-0.178766	0.178766
XM_020034629	NO	black	0.361213	0.306687	0.834052	0.664371	0.104483	0.0371384	0.490336	0.128832	0.0979157	0.608114	0.683376	0.448204	0.00289679	0.15083	-0.261555	-0.133236	0.196111	-0.172417	-0.649624	-0.394139	-0.570081	-0.843357	-0.250881	-0.720206	-0.120733	0.0578852	0.141727	-0.00678901	0.00678901
XM_020034635	NO	black	-0.20426	-0.208969	-0.434094	-0.799734	-0.178716	-0.0489523	-0.336833	-0.335207	-0.258351	-0.425474	-0.654604	-0.571775	0.257615	0.0425407	0.314323	0.0133502	0.000929094	0.126856	0.501301	0.437542	0.508551	0.577649	0.613797	0.567962	0.140086	-0.034218	0.25391	-0.197416	0.197416
XM_020034643	NO	black	0.078967	0.072088	0.329612	0.492766	0.130364	0.0398813	0.374914	0.455807	0.700132	0.322529	0.643953	0.630324	0.246007	0.244074	-0.127203	-0.0648918	-0.0914207	-0.373594	-0.153498	-0.394554	-0.525315	-0.487217	-0.428286	-0.437122	-0.265781	0.133388	0.274356	0.506998	-0.506998
XM_020034662	NO	black	-0.13699	-0.14531	-0.177239	-0.328806	-0.241384	-0.0937044	-0.40851	-0.573467	-0.548524	-0.290433	-0.736345	-0.603738	0.0152177	0.0758117	0.240633	0.229672	0.23416	0.49789	0.516636	0.413833	0.643717	0.439178	0.290601	0.237791	-0.219477	-0.266167	0.0586053	-0.442621	0.442621
XM_005177519	NO	black	-0.248963	-0.272838	-0.347104	-0.185912	-0.164466	-0.0833776	-0.290013	-0.40574	-0.55651	-0.188008	-0.427102	-0.283166	-0.382927	-0.0975745	0.349807	0.253824	0.259978	0.0508393	0.248935	0.381579	0.385576	0.320466	0.0977145	0.167944	-0.137427	-0.316449	-0.539932	-0.309189	0.309189
XM_005177540	NO	black	-0.229984	-0.355981	-0.392031	-0.551054	0.102031	0.240225	-0.322006	-0.294335	-0.218925	-0.721223	-0.817128	-0.780743	0.0515746	0.0392468	-0.0243617	0.08957	-0.217485	0.373122	0.75617	0.287453	0.553013	0.708911	0.523822	0.718577	0.114165	0.133984	0.129783	-0.0909163	0.0909163
XM_005177550	NO	black	-0.542276	-0.534525	-0.348994	-0.38692	0.102858	0.237663	-0.13572	-0.576915	-0.257311	-0.552136	-0.594633	-0.522858	0.22089	0.386914	0.00130169	0.505058	0.219529	0.134097	0.482189	0.116	0.333802	0.461342	0.491719	0.477584	0.105082	0.0340579	0.00164389	-0.156197	0.156197
XM_005177564	NO	black	0.0216815	0.0831576	-0.308043	-0.342647	-0.167906	0.0587714	-0.411028	-0.328745	-0.496308	-0.54628	-0.80017	-0.785629	-0.108389	-0.260177	0.061322	0.0434589	-0.205926	0.642111	0.4069	0.451104	0.647027	0.631341	0.192756	0.557375	0.174018	-0.0838985	0.0183115	-0.404531	0.404531
XR_002194031	NO	black	0.357176	0.0737207	0.466837	0.578772	0.323313	0.387026	0.720649	0.506082	0.253878	0.172336	0.81291	0.44336	-0.34787	-0.275906	-0.154991	-0.149593	-0.0910422	-0.343788	-0.507067	-0.643704	-0.828922	-0.635856	-0.164954	-0.278428	0.0938522	0.36817	-0.36144	0.232434	-0.232434
XR_002194033	NO	black	0.175903	-0.0644169	0.640874	0.694277	0.425131	0.320552	0.791093	0.336804	0.238243	0.38615	0.916492	0.566411	-0.0415783	-0.0306086	-0.177997	0.0340153	0.190256	-0.545837	-0.510114	-0.559416	-0.920001	-0.890217	-0.219884	-0.589503	-0.201898	0.136	-0.165916	0.122399	-0.122399
XM_005177650	NO	black	-0.307683	-0.0443734	-0.623967	-0.534132	-0.208767	-0.0964765	-0.659913	-0.35188	-0.384822	-0.555366	-0.924068	-0.70802	-0.073781	-0.136132	0.10194	0.101412	-0.222767	0.507707	0.491454	0.558782	0.807069	0.858781	0.17754	0.670077	0.222287	-0.148558	-0.107111	-0.225601	0.225601
XM_005177736	NO	black	-0.179432	-0.210448	-0.239818	-0.646532	-0.243839	-0.200257	-0.499218	-0.518266	-0.430201	-0.249946	-0.803492	-0.642171	0.273661	0.128614	0.218805	0.0772655	0.136962	0.499253	0.524607	0.55905	0.714444	0.504071	0.457576	0.310206	-0.111793	-0.286665	0.38048	-0.398947	0.398947
XM_005177751	NO	black	0.0133595	0.191725	-0.250645	-0.527753	-0.505439	-0.352677	-0.588809	-0.423787	-0.349054	-0.105668	-0.712691	-0.448687	0.164864	0.0653466	0.239737	-0.0488461	0.0299082	0.324561	0.239013	0.446599	0.744464	0.531817	0.256921	0.289236	0.15961	-0.110179	0.202454	-0.196914	0.196914
XM_020034800	NO	black	-0.352053	-0.0170648	-0.236211	-0.0981092	-0.170173	0.0156822	-0.218626	-0.288938	-0.0337244	-0.316398	-0.483605	-0.386315	0.348284	0.26755	-0.0921269	0.232144	-0.00337391	0.000550209	0.26923	0.470111	0.382197	0.319909	-0.00390314	0.228997	-0.0259898	-0.213975	0.267817	-0.125297	0.125297
XM_020034835	NO	black	0.303286	0.140488	0.0579417	0.410177	0.115401	-0.00528245	0.252651	0.3389	0.408513	0.221216	0.574387	0.604836	0.117494	-0.0172349	-0.0667882	0.112846	0.0376304	-0.321618	-0.252096	-0.419756	-0.417915	-0.300063	-0.547468	-0.337936	-0.0808052	0.0840132	-0.0792906	0.256865	-0.256865
XM_011291926	NO	black	0.0541541	-0.138849	-0.260893	-0.386565	-0.227768	-0.0762078	-0.0753254	-0.113597	-0.334877	-0.1384	-0.235033	-0.290801	-0.196482	-0.220118	0.521256	-0.171116	0.0740733	-0.201635	0.256385	0.451494	0.174179	0.156733	0.272678	0.194032	-0.162754	-0.280887	-0.227013	-0.208352	0.208352
XM_005177896	NO	black	-0.1733	-0.0788194	-0.502036	-0.713867	-0.243592	0.0156897	-0.499766	-0.368941	-0.306056	-0.622438	-0.883759	-0.796442	-0.0241686	0.00265957	0.0717277	-0.0292347	-0.226025	0.479517	0.602741	0.421911	0.718663	0.82374	0.510676	0.783708	0.320004	0.105135	0.183782	-0.152445	0.152445
XM_020034855	NO	black	0.104163	-0.165763	0.559361	0.612742	0.559538	0.362248	0.761625	0.369865	0.347843	0.318777	0.910529	0.596673	-0.00881336	0.0269537	-0.296168	0.0740693	0.128382	-0.454574	-0.423181	-0.704309	-0.930608	-0.798355	-0.150651	-0.4967	-0.129033	0.254613	-0.0876607	0.213645	-0.213645
XM_011291940	NO	black	0.172254	-0.0825042	0.4368	0.667651	0.377694	0.485073	0.808564	0.259517	0.194559	0.0617947	0.804818	0.432683	-0.19101	-0.0827614	-0.155127	0.223837	0.119748	-0.359104	-0.341616	-0.708016	-0.878249	-0.654135	-0.270544	-0.298362	-0.0566922	0.266633	-0.226041	0.114171	-0.114171
XM_005177945	NO	black	0.125516	-0.143679	0.316739	0.6379	0.504377	0.340889	0.594345	0.471355	0.444043	0.165869	0.807349	0.59855	-0.0477714	-0.113108	-0.294151	0.0975894	-0.0649494	-0.185456	-0.290026	-0.707968	-0.790816	-0.549024	-0.261594	-0.33187	-0.0500983	0.294343	-0.172582	0.310713	-0.310713
XM_005177942	NO	black	-0.0177809	0.132805	-0.0435819	-0.164882	-0.401088	0.0241216	-0.174872	-0.653386	-0.409151	-0.342281	-0.570467	-0.625966	0.309137	0.298123	0.0566104	0.3596	0.210476	0.12588	0.313476	0.399033	0.449759	0.290419	-0.051456	0.243685	0.0189254	-0.173525	0.305664	-0.286575	0.286575
XM_005177953	NO	black	-0.110472	0.119114	-0.304636	-0.658455	-0.440446	-0.243025	-0.487682	-0.406805	-0.337279	-0.240009	-0.669723	-0.538107	0.0261226	0.0546245	0.353789	-0.121151	-0.0161596	0.291439	0.393345	0.494256	0.640357	0.550093	0.430975	0.453265	0.124931	-0.109333	0.277719	-0.19109	0.19109
XM_011291953	NO	black	0.172614	-0.187589	0.376122	0.523122	0.511961	0.442681	0.754002	0.446036	0.371698	0.0963997	0.816143	0.474458	-0.00200312	-0.126222	-0.206216	0.0550471	0.015345	-0.365177	-0.278001	-0.641823	-0.873294	-0.624591	-0.0698768	-0.287615	-0.0742405	0.295124	-0.128433	0.208467	-0.208467
XR_002194063	NO	black	-0.0713238	-0.0524431	-0.35998	-0.637989	-0.138925	-0.202084	-0.563605	-0.299334	-0.293364	-0.300967	-0.788337	-0.630346	0.19609	-0.0143594	0.0851748	-0.101008	-0.105794	0.603531	0.471058	0.531359	0.713046	0.595579	0.345502	0.396504	-0.00614016	-0.256911	0.360487	-0.320009	0.320009
XR_002194068	NO	black	0.141636	-0.0599986	0.495558	0.518747	0.296419	0.265987	0.673796	0.485855	0.427802	0.317535	0.840845	0.626425	-0.0251118	-0.0726263	-0.138685	-0.0548151	0.0330689	-0.409502	-0.326367	-0.6604	-0.809323	-0.690063	-0.101572	-0.429836	-0.163103	0.293043	0.0446905	0.213625	-0.213625
XM_020034890	NO	black	-0.0593204	-0.241262	-0.285809	-0.506656	-0.150652	-0.171185	-0.309088	-0.237975	-0.433208	-0.162729	-0.543138	-0.446452	0.0643824	-0.241694	0.419544	-0.0352809	0.12164	0.29303	0.381359	0.471706	0.457578	0.316122	0.346947	0.183383	-0.270004	-0.41652	0.0129278	-0.501641	0.501641
XM_011291965	NO	black	-0.285908	-0.190538	-0.666882	-0.524606	-0.055314	0.0983435	-0.473449	-0.198504	-0.216802	-0.713376	-0.799972	-0.609995	-0.0631037	-0.217715	0.0500616	0.192343	-0.27163	0.518255	0.613024	0.236458	0.627485	0.875145	0.296455	0.782387	0.249187	0.0919153	-0.0426716	-0.13589	0.13589
XR_002194075	NO	black	-0.155558	-0.13043	0.156476	0.370071	0.281826	0.0879335	0.19524	0.139662	0.14833	0.183104	0.415677	0.490022	-0.156847	-0.118111	-0.194842	0.262491	0.155018	0.187334	-0.0429481	-0.626936	-0.339729	-0.219688	0.0289258	-0.223364	-0.113897	0.277836	-0.0246559	0.0752126	-0.0752126
XR_891383	NO	black	0.0683646	0.0493224	0.457459	0.607394	0.196837	-0.0166916	0.489247	0.270608	0.415634	0.561043	0.831771	0.744729	0.36919	0.204292	-0.166173	0.161983	0.285913	-0.625876	-0.453216	-0.312972	-0.67831	-0.772985	-0.486097	-0.739125	-0.334092	-0.0968368	0.143	0.170001	-0.170001
XM_011291983	NO	black	0.43752	0.217028	0.615269	0.742333	0.275771	0.126892	0.564134	0.345068	0.218117	0.496542	0.81145	0.56476	-0.0469699	-0.069825	-0.352263	-0.058868	0.125018	-0.299838	-0.708204	-0.5341	-0.71035	-0.805074	-0.466343	-0.673778	-0.0738061	0.0402061	-0.141252	0.0185838	-0.0185838
XM_020034930	NO	black	-0.282781	-0.174352	-0.293599	-0.658041	-0.248455	-0.0423203	-0.287403	-0.415286	-0.241195	-0.394798	-0.686014	-0.62895	0.19619	0.204952	0.36905	0.0278957	0.0129226	0.294383	0.495435	0.408568	0.506956	0.491774	0.496771	0.489608	0.0176199	-0.0917593	0.271408	-0.123116	0.123116
XM_005178171	NO	black	-0.0438062	-0.16175	0.193718	0.435339	0.379249	0.0190013	0.414475	0.437561	0.401579	0.435039	0.790854	0.785615	-0.0515559	-0.1232	-0.0829037	0.048296	0.154714	-0.535651	-0.364025	-0.529392	-0.674128	-0.563013	-0.236893	-0.495712	-0.216793	0.0442275	-0.235296	0.236073	-0.236073
XM_020034948	NO	black	0.340187	0.391905	0.197671	0.530334	-0.0255798	0.183423	0.337248	0.135823	0.253131	0.0679121	0.463288	0.303686	0.0629267	0.119588	-0.375677	0.0888581	-0.0253239	-0.366296	-0.504103	-0.37313	-0.399231	-0.297128	-0.422702	-0.165605	0.341793	0.251221	-0.122787	0.319499	-0.319499
XM_020034951	NO	black	0.0927506	0.19053	0.284267	0.401025	0.0178881	0.073251	0.435179	0.118048	0.347971	0.268205	0.586755	0.420973	0.275575	0.247771	-0.214291	0.128439	0.138959	-0.356702	-0.435726	-0.38975	-0.537659	-0.494547	-0.376662	-0.344701	0.0489699	0.0970846	0.146823	0.36292	-0.36292
XM_020034995	NO	black	0.122948	0.157803	-0.0673114	0.2447	0.116401	-0.112806	0.0649591	0.116164	0.161351	0.177688	0.338676	0.328399	0.0232758	-0.047464	-0.0314973	0.103186	0.0987387	-0.221211	-0.161366	-0.0922496	-0.224969	-0.178536	-0.450718	-0.245994	-0.143881	-0.208405	-0.105584	0.108742	-0.108742
XR_002194104	NO	black	0.211143	0.0334845	0.322282	0.677893	0.349987	0.267955	0.589749	0.588244	0.538857	0.215624	0.819094	0.616234	0.0479556	-0.0708062	-0.122919	-0.029828	-0.0986104	-0.59887	-0.37604	-0.43534	-0.7671	-0.60925	-0.519093	-0.424346	-0.172911	0.122882	-0.275629	0.387919	-0.387919
XM_005178406	NO	black	0.306291	0.308678	-0.0128531	0.00344345	-0.053693	-0.207832	0.000599826	0.635079	0.510507	0.305211	0.424453	0.471051	-0.0227364	-0.170707	0.0682512	-0.509269	-0.377809	-0.244054	-0.16477	-0.0203089	-0.209903	-0.1337	-0.267753	-0.155539	-0.0128245	0.090841	0.135476	0.390758	-0.390758
XM_020035065	NO	black	0.0967887	0.102416	0.279589	0.358753	0.185803	0.00591907	0.408083	0.447259	0.385135	0.426306	0.744976	0.621496	-0.0998334	-0.0535776	-0.0804331	-0.170902	0.0470542	-0.635416	-0.329222	-0.306769	-0.612162	-0.548235	-0.213026	-0.422648	-0.159098	0.148092	-0.0999795	0.319606	-0.319606
XM_005178462	NO	black	0.262095	0.22923	0.387845	0.803068	0.202954	0.00900394	0.255532	0.267239	0.0900232	0.467202	0.625251	0.593121	-0.305513	-0.121342	-0.292937	0.0141695	0.0736084	-0.156442	-0.648665	-0.409789	-0.458104	-0.553102	-0.545828	-0.590797	-0.0281059	0.00676177	-0.501446	0.158499	-0.158499
XM_005178463	NO	black	0.232551	0.0735408	0.5566	0.682819	0.340794	0.234349	0.678506	0.54956	0.457395	0.385784	0.924844	0.656819	-0.0617529	-0.091941	-0.175713	-0.0885709	-0.0262726	-0.403062	-0.405921	-0.546043	-0.84852	-0.772099	-0.369487	-0.542219	-0.223243	0.203409	-0.00730121	0.234	-0.234
XR_002194111	NO	black	0.252144	0.084021	0.579792	0.653691	0.325117	0.169758	0.658301	0.526544	0.396411	0.494727	0.938804	0.708233	-0.0621452	-0.0935565	-0.161835	-0.14504	0.0507839	-0.463291	-0.587162	-0.574159	-0.849774	-0.833632	-0.282041	-0.618031	-0.168653	0.137421	-0.106993	0.214678	-0.214678
XM_005178495	NO	black	0.474407	0.457795	0.586341	0.632693	-0.0627482	-0.229965	0.242467	0.283242	0.140293	0.726516	0.699937	0.625579	-0.206904	-0.072872	-0.115182	-0.254131	0.112349	-0.226539	-0.639363	-0.281902	-0.432887	-0.701422	-0.569292	-0.749464	-0.179402	-0.0886686	-0.070187	0.0769327	-0.0769327
XM_005178496	NO	black	0.0941184	0.0308476	0.290802	0.262055	0.169379	0.0850482	0.488664	0.543014	0.722788	0.314849	0.709823	0.608653	0.320151	0.191788	-0.111049	-0.198494	-0.125217	-0.328386	-0.307933	-0.463244	-0.641903	-0.517411	-0.144772	-0.337294	-0.067548	0.243478	0.334493	0.534018	-0.534018
XM_020035074	NO	black	0.0334502	-0.062519	-0.11072	-0.0231331	-0.0163155	0.0381501	-0.230532	-0.422992	-0.421078	-0.224426	-0.384329	-0.354862	-0.0104728	-0.0510827	-0.276898	0.279348	0.112504	0.188681	0.256448	0.156667	0.329841	0.263709	0.0162153	0.162892	0.0791622	-0.0999459	0.0810344	-0.305139	0.305139
XM_005178618	NO	black	-0.117367	-0.0358353	0.312958	0.37456	0.236275	0.0890394	0.495699	0.408217	0.441185	0.397081	0.743569	0.625743	0.0638043	0.0603788	-0.127363	-0.0353627	0.112568	-0.412138	-0.51442	-0.454524	-0.67699	-0.596701	-0.06277	-0.42284	-0.0456007	0.160231	-0.0873722	0.228588	-0.228588
XR_891395	NO	black	0.338774	0.1842	0.590947	0.531423	0.0630752	0.156468	0.71341	0.272094	0.269781	0.445603	0.88895	0.565425	-0.0780812	0.11783	-0.0112146	-0.122778	0.161221	-0.52382	-0.602592	-0.478898	-0.813954	-0.823361	-0.265508	-0.533241	-0.0438119	0.14794	-0.0108946	0.216085	-0.216085
XM_011292283	NO	black	-0.507062	-0.265668	-0.743376	-0.467059	0.00894281	0.0508348	-0.503237	-0.0982865	-0.186166	-0.662749	-0.732764	-0.492055	-0.134288	-0.357113	0.117371	0.249306	-0.262285	0.413409	0.681461	0.332405	0.593157	0.862533	0.216401	0.728989	0.0747057	-0.0204855	-0.128346	-0.223091	0.223091
XM_005178700	NO	black	0.0440763	0.0018848	-0.164018	-0.0731491	0.193077	-0.020084	-0.33909	-0.0981251	-0.230016	-0.131012	-0.400194	-0.335642	-0.0434692	-0.0604689	-0.319227	-0.1208	-0.105131	0.243595	-0.0464005	0.319714	0.35724	0.26506	0.220354	0.126411	0.189099	-0.122202	-0.26436	-0.0977503	0.0977503
XM_005178704	NO	black	-0.288051	-0.00752966	-0.163518	-0.116557	-0.127761	-0.138473	-0.315046	-0.111579	-0.111596	-0.0952554	-0.309595	-0.139718	0.0867584	-0.141314	0.133539	0.172365	-0.0707267	0.0986307	0.164727	0.282848	0.325749	0.288831	-0.112936	0.153212	0.0111642	-0.115193	-0.00501658	-0.174219	0.174219
XM_005178816	NO	black	0.489406	0.319145	0.564203	0.579028	0.0779761	-0.193534	0.325295	0.361768	0.104203	0.746528	0.772641	0.641869	-0.114396	-0.202805	-0.0641456	-0.291945	0.17795	-0.260722	-0.618525	-0.238011	-0.532949	-0.788631	-0.364749	-0.802534	-0.302999	-0.184985	-0.0982277	-0.0258715	0.0258715
XR_002194140	NO	black	0.0947509	-0.0980881	0.454131	0.472127	0.522287	0.30407	0.658263	0.547205	0.403987	0.290517	0.840164	0.539942	-0.0427909	-0.131036	-0.179247	-0.146058	-0.0775596	-0.442381	-0.43141	-0.528633	-0.84998	-0.687885	-0.131334	-0.380526	-0.066647	0.246247	-0.162167	0.259724	-0.259724
XM_005178894	NO	black	0.168296	0.190572	0.212759	-0.092534	-0.0670224	0.0138626	0.30735	0.257226	0.416236	0.165453	0.408668	0.304841	0.154097	0.130907	0.0902977	-0.251928	-0.0887635	-0.339547	-0.097588	-0.351199	-0.366631	-0.250292	0.115871	-0.0454229	0.0812293	0.310834	0.453028	0.315984	-0.315984
XM_005178895	NO	black	0.0413471	-0.204741	0.118275	-0.0402485	-0.0445746	-0.0923853	0.250182	-0.0157925	0.345341	0.299477	0.413599	0.454866	0.340584	0.488832	0.180039	0.054504	0.309797	-0.36722	-0.14394	-0.332206	-0.332922	-0.338992	0.0556949	-0.308498	-0.115754	0.00342003	0.173154	0.325219	-0.325219
XM_005178930	NO	black	-0.0335136	0.156211	0.057632	-0.119189	-0.187447	-0.0480979	-0.156421	-0.456258	-0.404926	-0.145957	-0.409449	-0.448063	0.105205	0.0505606	0.0384507	0.210997	0.114688	0.366041	0.117709	0.258673	0.324783	0.153691	-0.102955	0.109078	-0.00777285	-0.218941	0.326631	-0.40839	0.40839
XM_005178925	NO	black	0.18447	0.272669	0.367616	0.434172	-0.0412134	-0.131122	0.354695	0.483634	0.678093	0.546851	0.759531	0.743782	0.291037	0.235454	-0.122194	-0.181082	-0.0154555	-0.393385	-0.4859	-0.345157	-0.546765	-0.597618	-0.449213	-0.570504	-0.131584	0.0710892	0.294481	0.429503	-0.429503
XM_005178979	NO	black	0.232919	0.173149	-0.0546543	-0.0640881	-0.0704861	-0.188925	0.0906569	0.195437	0.109661	0.296356	0.441562	0.487642	-0.274086	-0.116038	0.341056	-0.155931	0.0341282	-0.294583	-0.3545	-0.31668	-0.282032	-0.158005	-0.181108	-0.121844	0.163925	0.104985	-0.301249	0.301215	-0.301215
XM_005178960	NO	black	-0.219162	0.0169818	-0.444211	-0.701515	-0.28941	-0.0974875	-0.53164	-0.46041	-0.562002	-0.445936	-0.886154	-0.792001	-0.122461	-0.11875	0.116868	-0.0603095	-0.087587	0.453944	0.356478	0.549232	0.741828	0.711883	0.537975	0.646657	0.316031	-0.0746588	0.0664002	-0.397032	0.397032
XM_005178961	NO	black	0.0889319	0.00501737	-0.0789218	-0.324646	-0.156518	-0.0143601	-0.282363	-0.169435	-0.303649	-0.229418	-0.475197	-0.458791	-0.246422	-0.136758	0.0804855	-0.203087	-0.222378	0.348541	0.312937	0.169629	0.393436	0.351739	0.204905	0.343883	0.108683	0.0140501	0.0743868	-0.13681	0.13681
XM_011292389	NO	black	-0.286888	-0.489829	-0.0475059	0.0249784	0.269989	0.188117	-0.128036	-0.255033	-0.196922	-0.332618	-0.411668	-0.338766	0.016381	0.0372189	-0.00648217	0.372039	0.0772028	0.205165	0.658876	0.0818311	0.253411	0.231478	0.0393774	0.120971	-0.422135	-0.120539	-0.0391579	-0.247355	0.247355
XM_005178989	NO	black	0.478259	0.375502	0.332326	0.251635	0.0323546	-0.00186572	0.217047	0.463747	0.284637	0.336639	0.508344	0.416846	-0.278073	-0.235362	-0.308272	-0.438348	-0.252427	-0.257937	-0.453873	-0.496818	-0.371981	-0.313202	-0.0691802	-0.183379	0.330964	0.462062	-0.0384907	0.282088	-0.282088
XM_011292420	NO	black	-0.218208	0.0449034	-0.142981	-0.250787	-0.24188	-0.172895	-0.374209	-0.0270287	0.0593743	-0.107754	-0.493265	-0.290812	0.206839	0.0834514	0.0232816	-0.146389	-0.195745	0.14023	0.195355	0.417066	0.481441	0.332839	0.0593732	0.175898	-0.017724	-0.133132	0.229766	-0.0723988	0.0723988
XM_011292423	NO	black	-0.263713	-0.319032	0.174764	0.031043	0.122302	0.112448	0.354745	-0.218385	0.0138905	0.109219	0.341334	0.268996	0.190748	0.271504	0.139848	0.423067	0.423139	-0.0110372	0.113338	-0.358484	-0.369541	-0.299713	0.191658	-0.185271	-0.237945	0.078535	0.325762	-0.0722451	0.0722451
XM_011292424	NO	black	-0.403163	-0.255616	-0.0137799	0.296613	0.258284	0.105017	0.217707	0.0281214	0.147688	0.0765971	0.394954	0.400013	0.0940701	0.0681863	0.0196722	0.443306	0.165187	-0.218574	0.0148279	-0.164653	-0.366613	-0.212302	-0.241306	-0.180622	-0.190943	-0.0334164	-0.0630173	0.0491576	-0.0491576
XM_020035265	NO	black	-0.11363	-0.191975	-0.162154	0.124812	0.0142052	0.116519	-0.25615	-0.405769	-0.254882	-0.364278	-0.473694	-0.346203	0.0817306	0.0915592	-0.191898	0.48266	0.0962899	0.267466	0.463204	0.0481934	0.379462	0.356862	-0.15158	0.178344	-0.111066	-0.0796371	-0.0692434	-0.12949	0.12949
XM_011292488	NO	black	0.174391	-0.0637715	0.69921	0.592469	0.424632	0.238976	0.719111	0.38561	0.343768	0.468288	0.871208	0.572136	0.0732439	0.0510897	-0.197844	-0.0843377	0.115891	-0.445008	-0.517823	-0.568335	-0.860018	-0.884981	-0.156966	-0.61801	-0.191996	0.156143	0.00256177	0.152007	-0.152007
XM_005179269	NO	black	-0.364969	-0.395536	-0.136318	-0.309043	0.217171	-0.0419205	-0.401795	-0.291356	-0.338844	-0.173753	-0.606719	-0.445633	0.0935713	-0.0147293	-0.169969	0.124232	0.0669462	0.497295	0.461505	0.332122	0.496469	0.347665	0.434062	0.156028	-0.206139	-0.186831	0.146279	-0.344141	0.344141
XM_020035322	NO	black	-0.0835569	0.265033	-0.00701552	0.0370632	-0.150989	0.0651056	-0.112014	-0.184804	0.0194824	-0.186931	-0.302652	-0.285675	0.197048	0.285538	-0.330467	0.0495045	-0.12556	0.0134546	-0.175679	0.150908	0.220861	0.168689	-0.0870742	0.175421	0.352605	0.0480944	0.175428	0.0844529	-0.0844529
XM_005179325	NO	black	-0.0319204	0.0214264	-0.459304	-0.477112	-0.211164	-0.172608	-0.604905	-0.406854	-0.536519	-0.36541	-0.79267	-0.64009	-0.101549	-0.204677	0.0742791	0.0554771	-0.0737257	0.484937	0.388961	0.527399	0.739589	0.668973	0.0970312	0.455668	0.132217	-0.256721	-0.0446841	-0.413832	0.413832
XM_005179433	NO	black	0.223521	-0.0391924	0.494109	0.494528	0.151127	0.155356	0.58531	0.255598	0.272804	0.33125	0.766243	0.594201	0.0312179	-0.0481618	0.0861008	0.137911	0.178547	-0.297947	-0.225892	-0.634489	-0.697415	-0.643485	-0.262951	-0.464354	-0.249986	0.164753	0.069561	0.153838	-0.153838
XM_005179497	NO	black	0.371576	0.36669	0.339121	0.227062	-0.189461	-0.18598	0.0487837	0.371569	0.378199	0.402654	0.350129	0.418436	-0.0348723	-0.00068616	-0.148935	-0.347484	-0.192187	0.0126604	-0.251255	-0.298016	-0.14874	-0.257548	-0.291679	-0.307658	0.0192316	0.242445	0.299529	0.357691	-0.357691
XM_011292593	NO	black	-0.262368	-0.0638922	-0.349193	-0.624592	-0.463497	-0.156876	-0.443238	-0.690232	-0.457843	-0.35498	-0.799631	-0.667136	0.248837	0.298948	0.222844	0.238208	0.215539	0.305172	0.459077	0.565687	0.702117	0.574321	0.387498	0.441563	0.0963482	-0.161312	0.327554	-0.28117	0.28117
XR_002194184	NO	black	0.18671	-0.0250517	0.559349	0.654759	0.340452	0.318018	0.785052	0.313479	0.333258	0.338827	0.921378	0.592471	-0.0174382	0.0882963	-0.237138	0.063667	0.185717	-0.471633	-0.501444	-0.641533	-0.909323	-0.818485	-0.202777	-0.516264	-0.0921873	0.24027	-0.0776499	0.269154	-0.269154
XR_002194189	NO	black	-0.305675	0.0434345	-0.0882193	-0.510821	-0.331678	-0.0957745	-0.334496	-0.331803	-0.12619	-0.174662	-0.60213	-0.500824	0.12952	0.35354	-0.0447912	-0.169104	-0.104703	0.253474	0.0738834	0.338379	0.506619	0.392937	0.520518	0.391108	0.39264	0.150843	0.301962	-0.0115423	0.0115423
XM_005179540	NO	black	-0.105075	0.129903	-0.433157	-0.601006	-0.569327	-0.365098	-0.636347	-0.38907	-0.354517	-0.151894	-0.747233	-0.471575	0.00589093	0.0891916	0.186027	-0.126985	0.0124858	0.389098	0.240996	0.614426	0.790335	0.608532	0.341788	0.358672	0.177087	-0.20077	0.169082	-0.207543	0.207543
XM_011292627	NO	black	0.0204205	-0.272781	-0.0467922	-0.108224	-0.110014	0.0761602	-0.116722	-0.450375	-0.462542	-0.20417	-0.345743	-0.322508	-0.215139	0.0980585	0.130106	0.209686	0.199766	0.258186	0.422918	0.102573	0.274523	0.201122	0.240073	0.142533	-0.119088	-0.00826181	-0.0813374	-0.193273	0.193273
XR_002194206	NO	black	-0.322692	-0.358208	-0.342347	-0.453035	-0.20627	-0.121992	-0.479782	-0.508698	-0.340877	-0.329204	-0.752756	-0.55705	0.200431	0.232169	0.227073	0.223959	0.113297	0.241971	0.68851	0.599707	0.65748	0.519719	0.229962	0.302048	-0.247652	-0.333593	0.16212	-0.219001	0.219001
XM_005179687	NO	black	0.177225	0.085508	0.58887	0.715131	0.217563	0.077066	0.576258	0.354306	0.417614	0.566498	0.915347	0.789451	0.0204045	0.112384	-0.208025	0.0187197	0.181615	-0.433301	-0.52093	-0.635725	-0.773367	-0.811151	-0.36178	-0.688914	-0.201886	0.16662	-0.0146366	0.352707	-0.352707
XM_005179691	NO	black	-0.0594922	0.131462	-0.323423	-0.560551	-0.391878	-0.216331	-0.590742	-0.321025	-0.22014	-0.313722	-0.839368	-0.677949	0.075549	0.129404	0.0652268	-0.210212	-0.218282	0.357295	0.405006	0.601799	0.781584	0.641146	0.240785	0.471529	0.167515	-0.109812	0.246709	-0.0880313	0.0880313
XM_020035468	NO	black	-0.127496	0.0472908	-0.467128	-0.572072	-0.297087	-0.303842	-0.719881	-0.174863	-0.0334994	-0.257598	-0.806012	-0.47939	0.208104	0.114494	-0.01968	-0.18164	-0.278515	0.546621	0.383796	0.495644	0.813971	0.724257	0.210324	0.436656	0.188179	-0.093734	0.262831	0.0382832	-0.0382832
XM_011292731	NO	black	-0.211987	-0.0380345	-0.535497	-0.794105	-0.358845	-0.172785	-0.470041	-0.321952	-0.291129	-0.404774	-0.70135	-0.564981	0.0268446	-0.0266321	0.410577	-0.0696666	-0.0722551	0.150535	0.477647	0.587129	0.622557	0.671037	0.450011	0.606283	0.15302	-0.13836	0.183686	-0.183854	0.183854
XM_005179905	NO	black	0.0397111	0.0439754	0.0727227	0.133318	-0.100521	-0.137752	0.231075	0.404005	0.743167	0.345732	0.556031	0.637531	0.281697	0.404422	0.0973128	-0.176909	-0.0836344	-0.51895	-0.269109	-0.267476	-0.402392	-0.32707	-0.362316	-0.30143	-0.0356173	0.114879	0.13397	0.703567	-0.703567
XM_011292761	NO	black	0.231954	0.00827288	0.536229	0.755455	0.284133	0.234789	0.69792	0.197736	0.15884	0.38474	0.89042	0.643753	-0.178689	-0.00489822	-0.090692	0.193595	0.307584	-0.582483	-0.497761	-0.639541	-0.83519	-0.802104	-0.414981	-0.596828	-0.193183	0.102279	-0.321132	0.137226	-0.137226
XM_020035540	NO	black	0.52011	0.556381	0.682337	0.358185	-0.302769	-0.166979	0.250953	-0.0871404	-0.0849385	0.569281	0.408364	0.219928	-0.00711622	0.189544	-0.105697	-0.250333	0.185598	-0.0108884	-0.662519	-0.1738	-0.249514	-0.597766	-0.211706	-0.532789	0.111605	0.0321606	0.242803	-0.0418936	0.0418936
XM_005179985	NO	black	-0.0858834	0.0905299	-0.47339	-0.722851	-0.475141	-0.120284	-0.548258	-0.430291	-0.355577	-0.511482	-0.893377	-0.756663	0.0260903	0.0561999	0.268066	-0.0605251	-0.142789	0.375607	0.468012	0.54539	0.789566	0.78934	0.437067	0.696706	0.320609	0.0188709	0.142175	-0.149431	0.149431
XM_005180000	NO	black	-0.277068	-0.25989	-0.261462	-0.599721	-0.245244	0.0962945	-0.0222734	-0.547361	-0.409234	-0.4121	-0.491428	-0.599654	0.101359	0.221043	0.367038	0.161016	0.223182	0.0715813	0.380733	0.379081	0.269565	0.302635	0.545013	0.450456	0.0414776	-0.155005	0.239339	-0.22927	0.22927
XM_020035556	NO	black	-0.281253	-0.171763	-0.468716	-0.714952	-0.225445	0.116775	-0.31488	-0.229038	-0.0779522	-0.673504	-0.761723	-0.723139	0.27306	0.0889386	0.229041	-0.00263532	-0.303028	0.30699	0.638289	0.448604	0.544369	0.716159	0.466755	0.777394	0.221572	0.0762078	0.375836	-0.0584691	0.0584691
XM_020035562	NO	black	-0.160936	0.0164937	-0.69286	-0.719709	-0.427562	-0.449946	-0.826073	-0.268105	-0.329307	-0.227906	-0.833278	-0.438884	0.015976	-0.140517	0.37246	-0.110758	-0.0806203	0.341585	0.473148	0.752669	0.902616	0.803351	0.278845	0.442895	0.025588	-0.336552	0.00168652	-0.222139	0.222139
XM_020035580	NO	black	0.37408	0.0901749	0.47739	0.443732	0.347359	0.124896	0.497441	0.520946	0.303229	0.430944	0.7772	0.551989	-0.338983	-0.134411	-0.102065	-0.401964	-0.122377	-0.24798	-0.53017	-0.495481	-0.688219	-0.642242	-0.0976975	-0.42997	0.0158299	0.253207	-0.2572	0.292509	-0.292509
XM_020035573	NO	black	0.333574	0.258115	0.166934	0.224509	-0.0208979	-0.219476	0.143464	0.466399	0.499878	0.45926	0.56066	0.600277	-0.0249657	0.0981285	0.153327	-0.379968	-0.131326	-0.315683	-0.490671	-0.175957	-0.346736	-0.381432	-0.431589	-0.408048	-0.0213096	-0.0339237	-0.121145	0.453671	-0.453671
XM_005180045	NO	black	0.376729	0.0783549	0.220034	0.288687	-0.0532897	0.0116401	0.358711	0.121349	-0.105881	0.259494	0.549134	0.444154	-0.512317	-0.304308	0.34506	0.0125086	0.240291	-0.284381	-0.227542	-0.4759	-0.441866	-0.388465	-0.217443	-0.282827	-0.142889	0.0740992	-0.40244	0.0358404	-0.0358404
XM_011292804	NO	black	0.0859143	0.178179	-0.0278153	-0.470997	-0.495776	-0.123115	-0.277532	-0.411601	-0.462565	-0.174068	-0.533057	-0.518645	-0.293718	-0.00399584	0.369393	-0.166378	-0.038581	0.449284	0.117453	0.179421	0.475164	0.364063	0.337216	0.390497	0.30052	0.0933862	0.0527624	-0.173656	0.173656
XM_005180112	NO	black	-0.0534755	-0.337139	0.467954	0.444506	0.609209	0.461285	0.792263	0.407115	0.334308	0.148	0.787335	0.423666	0.0224804	-0.0349949	-0.169188	0.0295383	0.0655441	-0.486504	-0.237683	-0.538104	-0.900057	-0.707545	0.0732486	-0.329708	-0.192521	0.239808	-0.0804194	0.138629	-0.138629
XM_005180141	NO	black	-0.232171	0.119569	-0.563848	-0.680131	-0.46265	-0.45303	-0.818358	-0.351404	-0.344911	-0.165164	-0.855566	-0.475855	-0.0570122	-0.0106203	0.23347	-0.148752	-0.0969449	0.373701	0.36317	0.677182	0.909946	0.763984	0.294259	0.437984	0.152986	-0.209824	0.0635343	-0.155902	0.155902
XM_005180206	NO	black	0.135458	0.139347	0.602408	0.538141	-0.00438543	-0.167369	0.415156	0.121799	0.259378	0.740004	0.790367	0.725823	0.118374	0.295368	0.0102515	-0.0117597	0.36874	-0.415446	-0.506272	-0.332647	-0.581501	-0.817789	-0.312318	-0.806119	-0.329881	-0.0634254	0.123174	0.163395	-0.163395
XM_020035621	NO	black	0.291888	0.283244	0.301633	0.601592	0.0861477	-0.248425	0.234313	0.45848	0.415382	0.683717	0.772855	0.798803	0.164477	-0.0211283	-0.107523	-0.135285	0.108863	-0.411776	-0.576046	-0.162475	-0.49692	-0.655604	-0.623866	-0.775411	-0.306245	-0.225744	-0.0739933	0.224421	-0.224421
XM_005180229	NO	black	0.356843	0.339732	0.655631	0.440129	-0.0590516	-0.210417	0.281931	0.216855	0.196851	0.740876	0.628522	0.533107	-0.0600103	0.178042	-0.141682	-0.336338	0.134791	-0.28718	-0.727921	-0.260168	-0.425184	-0.733575	-0.332077	-0.715537	-0.0629407	-0.0397469	0.043546	0.104482	-0.104482
XM_005180250	NO	black	-0.146915	-0.0851678	-0.447051	-0.321644	-0.0667932	-0.133979	-0.54043	-0.263859	-0.432303	-0.359818	-0.678074	-0.481334	-0.159288	-0.337095	0.234703	0.14025	-0.0163264	0.456018	0.582837	0.424285	0.631339	0.605608	0.131516	0.362683	-0.206446	-0.298962	-0.144607	-0.379087	0.379087
XM_005180256	NO	black	0.512989	0.356831	0.747751	0.700601	0.0832123	0.0936952	0.5315	0.42533	0.393276	0.51612	0.785584	0.57414	-0.0243359	0.0351501	-0.265172	-0.227094	-0.0438571	-0.339403	-0.620695	-0.581803	-0.651392	-0.764356	-0.463229	-0.611334	-0.0176685	0.265262	0.0321084	0.284728	-0.284728
XM_005180268	NO	black	0.266012	0.201625	0.594374	0.644404	0.196532	-0.047442	0.415254	0.416251	0.420327	0.654801	0.7935	0.739203	0.0276684	0.0975577	-0.285819	-0.172983	0.106441	-0.38777	-0.631766	-0.511805	-0.61209	-0.756718	-0.335031	-0.72767	-0.140669	0.132358	-0.032104	0.248566	-0.248566
XM_020035650	NO	black	0.416298	0.00232226	0.088261	0.473138	0.295655	0.229326	0.36364	0.247197	0.135514	0.00985945	0.501068	0.33454	0.0345139	-0.186793	-0.0651881	0.163677	0.0489164	-0.168743	-0.17934	-0.34531	-0.463909	-0.30824	-0.357059	-0.236788	-0.0819132	0.0326952	-0.315123	0.0846674	-0.0846674
XM_005180271	NO	black	0.301318	0.199246	0.142361	0.29839	0.29024	-0.0827254	0.217281	0.60717	0.409572	0.418233	0.722934	0.723754	-0.139429	-0.309779	-0.0797842	-0.239383	-0.150386	-0.175127	-0.419586	-0.468993	-0.515188	-0.379696	-0.307068	-0.358511	0.00337236	0.155942	-0.108974	0.269245	-0.269245
XM_005180287	NO	black	0.320283	0.12937	0.600148	0.518085	0.281516	0.373022	0.812758	0.384696	0.362856	0.249597	0.864108	0.441794	-0.00399316	0.0471982	-0.244888	-0.12218	0.014662	-0.474565	-0.580189	-0.617824	-0.892208	-0.765546	-0.11252	-0.360586	0.121637	0.362727	0.0201374	0.252222	-0.252222
XM_005180295	NO	black	-0.0344356	-0.117165	-0.215591	-0.215157	-0.158253	-0.0676442	-0.438985	-0.372518	-0.429529	-0.30801	-0.711048	-0.603632	-0.0932112	-0.0179033	0.0835582	0.0598231	-0.0470666	0.542247	0.342313	0.47198	0.618352	0.448493	0.0808926	0.25878	-0.0532524	-0.311474	-0.104857	-0.311926	0.311926
XM_005180330	NO	black	0.0032943	-0.0654101	0.0537946	-0.109414	-0.0718868	0.112594	-0.156427	-0.581064	-0.668748	-0.257846	-0.556896	-0.651363	-0.0376952	0.0239411	-0.194863	0.235934	0.236244	0.424316	0.207342	0.275684	0.39713	0.196604	0.290727	0.157693	0.0108399	-0.149855	0.072051	-0.550875	0.550875
XM_005180334	NO	black	-0.265076	0.0225058	-0.627642	-0.564017	-0.390662	-0.300247	-0.780999	-0.46774	-0.336606	-0.369976	-0.911501	-0.556464	0.0434513	0.109312	0.163956	0.109789	-0.0923036	0.428491	0.447127	0.615232	0.903603	0.840777	0.11509	0.523428	0.19392	-0.208472	-0.000687209	-0.108087	0.108087
XM_020035666	NO	black	-0.332163	-0.305107	-0.0757054	0.383596	0.0770994	-0.130046	0.228017	-0.0532004	0.230207	0.345824	0.546969	0.666575	0.0188395	0.319665	0.149514	0.449785	0.465474	-0.431084	-0.0688107	-0.187992	-0.411429	-0.384633	-0.435187	-0.490825	-0.452966	-0.290709	-0.194014	0.229511	-0.229511
XM_005180344	NO	black	-0.144239	0.0890398	-0.22722	-0.490231	-0.309954	-0.0999588	-0.517107	-0.492415	-0.365385	-0.347178	-0.857665	-0.727853	0.14554	0.219617	-0.0894123	-0.0241636	-0.0892846	0.37886	0.221725	0.517206	0.744598	0.58809	0.342272	0.46417	0.345516	-0.0402129	0.205188	-0.230066	0.230066
XM_011292932	NO	black	-0.277734	-0.0318759	-0.700267	-0.575366	-0.351576	-0.277582	-0.77487	-0.407839	-0.465761	-0.424543	-0.922378	-0.604207	-0.0827973	-0.184432	0.239066	0.129009	-0.0805074	0.473754	0.529597	0.669311	0.89938	0.868646	0.144559	0.560222	0.0868581	-0.301342	-0.110555	-0.337216	0.337216
XM_011292935	NO	black	0.248289	0.213109	0.44255	0.628207	0.22856	0.158879	0.580459	0.434905	0.327444	0.359236	0.854615	0.651077	-0.0479546	-0.216147	-0.0959054	-0.00778221	0.0483535	-0.472946	-0.463944	-0.556763	-0.757138	-0.665372	-0.336048	-0.462874	-0.102216	0.167359	-0.0696838	0.15543	-0.15543
XM_005180454	NO	black	-0.085456	0.0200318	-0.286352	-0.75741	-0.426667	-0.288526	-0.425513	-0.31722	-0.269121	-0.136424	-0.652226	-0.550108	0.274979	0.154916	0.378186	-0.268739	0.0156423	0.12911	0.308871	0.766519	0.613351	0.418118	0.550261	0.316106	0.0131304	-0.270784	0.367268	-0.217583	0.217583
XM_020035711	NO	black	0.26254	-0.0773371	0.734861	0.634594	0.414912	0.3801	0.844549	0.245352	0.254193	0.321193	0.855817	0.455173	0.0800804	0.101004	-0.253159	0.073059	0.234771	-0.402606	-0.444381	-0.661561	-0.902348	-0.893403	-0.136208	-0.563327	-0.194791	0.188283	0.0734304	0.0696255	-0.0696255
XM_005180505	NO	black	0.3456	0.162483	0.463831	0.60825	0.395285	0.228865	0.615386	0.528412	0.34852	0.338054	0.834662	0.541478	-0.117815	-0.145076	-0.224319	-0.184744	-0.097628	-0.450242	-0.586006	-0.446274	-0.789034	-0.704492	-0.399521	-0.463546	-0.0213307	0.149657	-0.200054	0.267703	-0.267703
XM_020035718	NO	black	-0.0972162	-0.108296	0.220858	0.343411	0.221265	0.109796	0.522791	0.313925	0.284682	0.299473	0.695158	0.526805	0.00446051	-0.00453319	0.144142	-0.00382409	0.161227	-0.548642	-0.286883	-0.193513	-0.66153	-0.577874	-0.0762782	-0.384083	-0.260318	-0.0278072	-0.136996	0.240954	-0.240954
XM_011292995	NO	black	-0.419698	-0.310302	-0.71561	-0.554281	0.0430856	0.117149	-0.420305	-0.142186	-0.298069	-0.687396	-0.709445	-0.566869	-0.253978	-0.353088	0.242579	0.13708	-0.255439	0.358489	0.588029	0.318478	0.51992	0.820255	0.379962	0.793904	0.196733	0.0364269	-0.3397	-0.101169	0.101169
XR_002194301	NO	black	0.0652705	-0.153174	0.0556837	-0.136129	-0.00364306	-0.0316468	0.16352	0.130264	0.225662	0.141416	0.210754	0.172255	0.127643	0.0659912	-0.0471861	-0.115634	0.0837866	-0.139169	-0.000303919	-0.264269	-0.207797	-0.173681	0.154094	-0.100635	-0.0774325	0.0307609	0.239298	0.0916495	-0.0916495
XR_002194297	NO	black	0.170604	0.209698	0.493964	0.739519	0.297334	0.270652	0.628856	0.564739	0.558993	0.278329	0.859884	0.621766	0.033058	-0.0529606	-0.273895	-0.0343808	-0.173833	-0.336835	-0.482171	-0.564048	-0.796507	-0.656376	-0.501605	-0.418785	-0.0179172	0.301019	0.0194195	0.348994	-0.348994
XM_005180629	NO	black	-0.0228677	-0.0903646	0.167463	0.057064	-0.237045	0.0727416	-0.0998693	-0.461566	-0.274155	-0.184371	-0.435847	-0.475226	0.242354	0.372707	-0.00614713	0.198741	0.15849	0.17223	0.346325	0.410105	0.341962	0.0755982	0.0477	-0.00267987	-0.242917	-0.217863	0.253663	-0.197053	0.197053
XM_011293033	NO	black	0.265414	0.0423804	0.449818	0.710688	0.324419	0.36995	0.712901	0.297405	0.317427	0.156239	0.816296	0.511502	-0.103287	-0.0046819	-0.259356	0.170682	0.0893443	-0.423552	-0.316285	-0.666244	-0.811902	-0.646106	-0.413128	-0.383571	-0.0964807	0.259475	-0.085103	0.209891	-0.209891
XM_020035784	NO	black	0.266561	0.296062	0.233595	0.540631	0.0880813	-0.119387	0.25107	0.625644	0.475646	0.49584	0.765563	0.754445	-0.217196	-0.236533	-0.0777152	-0.270052	-0.188587	-0.37371	-0.47151	-0.329461	-0.526863	-0.485069	-0.613544	-0.475953	-0.087563	0.0679353	-0.190566	0.352879	-0.352879
XM_020035779	NO	black	0.16056	0.245815	0.177643	0.235213	0.128878	0.171961	0.211206	0.25806	0.189207	-0.00633878	0.312996	0.181274	0.1025	-0.221715	-0.223572	-0.0109957	-0.192644	-0.306245	-0.157119	-0.224556	-0.282491	-0.135147	-0.134664	0.0161527	0.228575	0.322118	0.0953168	0.0640328	-0.0640328
XM_005180743	NO	black	-0.308097	-0.108463	-0.60984	-0.864872	-0.34296	-0.237788	-0.541896	-0.194538	0.0167522	-0.351904	-0.684324	-0.445966	0.218467	0.182938	0.331055	-0.165626	-0.17373	0.140116	0.511192	0.516959	0.639706	0.727273	0.5029	0.61422	0.199004	0.00138223	0.23667	0.140461	-0.140461
XM_005180758	NO	black	0.52108	0.269725	0.757556	0.606882	-0.0082169	-0.0315649	0.477948	0.197475	0.0881985	0.652458	0.719345	0.530606	-0.0946503	0.0276556	-0.188669	-0.183206	0.222407	-0.16813	-0.641054	-0.49056	-0.563924	-0.826752	-0.29921	-0.741849	-0.145095	0.0513744	0.0606476	-0.000590836	0.000590836
XR_002194317	NO	black	0.339475	0.207842	0.605257	0.632815	0.183082	0.244955	0.665518	0.510934	0.523975	0.373072	0.871013	0.580528	-0.0593543	0.0952631	-0.233588	-0.271263	-0.106822	-0.524482	-0.594976	-0.591959	-0.807978	-0.743225	-0.243078	-0.445757	0.0829464	0.364121	-0.0986142	0.469044	-0.469044
XM_020035815	NO	black	0.0347959	0.426091	0.204276	0.198495	-0.206848	-0.125117	0.119737	0.128672	0.112668	0.337402	0.323943	0.24931	-0.170585	0.0875982	0.0105586	-0.302024	-0.0772967	-0.128947	-0.624673	-0.0339925	-0.215519	-0.284621	-0.062683	-0.17823	0.309546	0.0869278	-0.138359	0.201048	-0.201048
XM_020035835	NO	black	-0.0120902	0.0348709	-0.185043	-0.364347	-0.142581	-0.0642302	-0.313396	-0.472736	-0.462072	-0.265375	-0.547546	-0.51336	-0.0155818	0.0423396	0.11688	0.0692979	0.147927	0.0630569	0.405512	0.459915	0.478512	0.372672	0.320959	0.288156	-0.0328067	-0.158882	0.152973	-0.252895	0.252895
XM_020035850	NO	black	-0.0182186	-0.0324086	0.312644	0.359942	0.189085	-0.0196951	0.390331	0.213333	0.132417	0.475896	0.690818	0.600298	-0.269598	-0.0170705	-0.0681462	0.00930117	0.249091	-0.0893555	-0.400593	-0.431857	-0.563591	-0.567455	-0.107472	-0.486174	-0.172067	0.065936	-0.0762281	0.0565796	-0.0565796
XM_005180924	NO	black	0.237559	0.185479	0.422164	0.166273	0.28476	0.192347	0.325215	0.698823	0.588299	0.181873	0.455995	0.242062	0.0276316	-0.0807047	-0.372462	-0.653984	-0.529658	-0.125178	-0.284385	-0.26681	-0.437235	-0.34826	0.179846	-0.0889693	0.196453	0.438601	0.311686	0.361009	-0.361009
XM_005180937	NO	black	-0.275672	-0.414055	-0.0376181	-0.0983017	0.128311	0.0843838	-0.148179	-0.538811	-0.341094	-0.21561	-0.403594	-0.307069	0.385816	0.203801	-0.1013	0.55554	0.404957	0.104737	0.463959	0.096268	0.285232	0.174708	0.256239	0.037279	-0.259205	-0.170747	0.189262	-0.400268	0.400268
XM_005180955	NO	black	-0.223182	-0.246989	0.0305983	0.439571	0.1224	-0.000771576	0.401106	-0.0943526	0.023941	0.292426	0.618665	0.590729	0.00225286	0.137864	0.279667	0.51687	0.532633	-0.431686	-0.199026	-0.216327	-0.539286	-0.497237	-0.388721	-0.488689	-0.416353	-0.306344	-0.30792	0.0103428	-0.0103428
XM_020035869	NO	black	0.104738	-0.236421	0.458516	0.627207	0.666029	0.510627	0.778222	0.509928	0.400636	0.100551	0.8444	0.511206	-0.0177299	-0.130419	-0.275609	0.101791	-0.038305	-0.375104	-0.292761	-0.704749	-0.924131	-0.672624	-0.178454	-0.339839	-0.128379	0.30367	-0.175075	0.195781	-0.195781
XM_020035885	NO	black	-0.376458	-0.393348	-0.400694	-0.416699	-0.0527432	0.125518	-0.146361	-0.5306	-0.41172	-0.468067	-0.493853	-0.418774	-0.0203594	0.0653747	0.202525	0.494746	0.289474	0.239045	0.381872	0.00961863	0.313619	0.45565	0.379431	0.451806	0.101949	-0.0244208	-0.127893	-0.378846	0.378846
XM_005181012	NO	black	-0.138964	-0.0107422	-0.377337	-0.627878	-0.494092	-0.136327	-0.393241	-0.554602	-0.521104	-0.404978	-0.78082	-0.72131	0.0381728	0.021073	0.435936	0.077645	0.136984	0.229201	0.514993	0.631438	0.663822	0.558307	0.395856	0.480457	-0.0352824	-0.293985	0.190388	-0.431928	0.431928
XM_005181055	NO	black	0.411177	0.279291	0.145756	0.190838	0.0795454	-0.103515	0.211961	0.492731	0.301797	0.379745	0.565291	0.480801	-0.289435	-0.15783	0.0984851	-0.524619	-0.156165	-0.454832	-0.496464	-0.168105	-0.41194	-0.374366	-0.147195	-0.278059	0.0862922	0.0738524	-0.34929	0.450588	-0.450588
XM_005181092	NO	black	-0.140139	0.160743	-0.602674	-0.738463	-0.490352	-0.384166	-0.790151	-0.414907	-0.399608	-0.302274	-0.897874	-0.589246	-0.0725413	-0.0542961	0.252775	-0.106606	-0.140818	0.502778	0.38712	0.615956	0.911862	0.838398	0.267426	0.576175	0.274905	-0.177245	0.11885	-0.180816	0.180816
XM_020035908	NO	black	-0.219041	0.100066	-0.501294	-0.662818	-0.525139	-0.464205	-0.781954	-0.427111	-0.396645	-0.154134	-0.839924	-0.470018	0.0240595	-0.0373326	0.348571	-0.0412189	0.0127352	0.3633	0.433168	0.657226	0.894646	0.710382	0.272393	0.38259	0.0210458	-0.31401	0.170844	-0.275441	0.275441
XM_005181183	NO	black	0.145432	-0.0468994	0.618496	0.522103	0.337446	0.451648	0.853235	0.24188	0.274156	0.163991	0.786013	0.366686	0.0210841	0.0621497	-0.260028	0.0846953	0.123428	-0.363703	-0.379472	-0.697165	-0.879594	-0.738422	-0.0185978	-0.321879	0.0082781	0.398964	0.114316	0.150984	-0.150984
XR_002194352	NO	black	0.593104	0.48918	0.132835	0.00739005	-0.134333	-0.0813147	0.111554	0.307076	0.103237	0.195569	0.272217	0.0843436	-0.194785	-0.149075	-0.059075	-0.551599	-0.216798	0.0736126	-0.476014	-0.0400418	-0.164366	-0.181499	-0.0636807	-0.0727455	0.30609	0.11191	-0.0168115	0.183129	-0.183129
XM_005181197	NO	black	-0.139111	-0.106591	-0.451345	-0.702348	-0.348783	-0.238352	-0.537884	-0.415658	-0.362546	-0.318786	-0.784843	-0.606852	0.151063	0.0307582	0.344556	-0.0297974	0.0589662	0.422062	0.606448	0.619476	0.732409	0.626964	0.494439	0.435722	-0.0864031	-0.238008	0.26365	-0.28566	0.28566
XM_011293267	NO	black	0.209069	0.445284	-0.0408225	-0.0989827	-0.276202	-0.0139882	-0.314316	-0.254979	-0.228639	-0.225955	-0.519716	-0.570484	0.107133	0.154138	-0.36246	-0.16282	-0.215878	0.199751	-0.22792	0.42685	0.468834	0.313904	-0.049802	0.270121	0.514699	-0.0239466	0.0481866	-0.106526	0.106526
XM_005181260	NO	black	0.158395	0.098092	0.452271	0.826543	0.172795	0.0338011	0.429063	0.250912	0.242143	0.496288	0.778898	0.693624	-0.0520232	-0.00755424	-0.250136	0.152833	0.203985	-0.332309	-0.444687	-0.421532	-0.613897	-0.702366	-0.576113	-0.692853	-0.289086	-0.0782003	-0.115321	0.0778972	-0.0778972
XM_005181246	NO	black	-0.081045	-0.21195	-0.346681	-0.352288	-0.114041	-0.14866	-0.345368	-0.505329	-0.600981	-0.235254	-0.488489	-0.35725	-0.221265	-0.172401	0.420585	0.320728	0.280746	0.505394	0.608474	0.289984	0.463458	0.415871	0.126815	0.218268	-0.318263	-0.294462	-0.00261983	-0.428069	0.428069
XM_005181249	NO	black	-0.326291	-0.316517	-0.532009	-0.537476	-0.078294	0.125963	-0.423339	-0.36368	-0.260658	-0.712539	-0.837384	-0.712279	0.0489609	-0.0408051	0.0909096	0.27143	-0.134313	0.484848	0.790931	0.291516	0.633049	0.801245	0.362766	0.724573	0.0771454	0.038546	0.104778	-0.209762	0.209762
XM_011293273	NO	black	-0.141922	0.17703	-0.431083	-0.536378	-0.553111	-0.423943	-0.75246	-0.459765	-0.322571	-0.176473	-0.83452	-0.490826	0.122874	0.112852	0.225749	0.0330892	-0.0212619	0.506726	0.336271	0.578239	0.886492	0.6832	0.0597379	0.344322	0.0933535	-0.293855	0.220094	-0.209836	0.209836
XM_005181311	NO	black	-0.255469	-0.246942	0.214298	0.508006	0.356054	0.118745	0.385627	0.247837	0.298426	0.29873	0.618816	0.591145	-0.00722995	0.103793	-0.066497	0.241863	0.151917	-0.456181	-0.365662	-0.314029	-0.566638	-0.497628	-0.350437	-0.435589	-0.164208	0.00585008	-0.367241	0.187594	-0.187594
XM_005181362	NO	black	-0.29811	-0.0915712	-0.606004	-0.541352	-0.346883	-0.42735	-0.804987	-0.478369	-0.410298	-0.204143	-0.848684	-0.421646	0.0413133	-0.0139221	0.272378	0.192967	0.126755	0.516943	0.496269	0.567071	0.892863	0.739326	0.143986	0.317698	-0.101241	-0.403348	-0.012096	-0.311941	0.311941
XM_020035985	NO	black	0.306936	0.172198	0.429023	0.569351	0.216807	-0.122483	0.191925	0.378716	0.198653	0.573644	0.6404	0.640347	-0.179994	-0.2126	-0.272787	-0.107867	0.0306668	0.00674922	-0.427582	-0.459103	-0.426837	-0.549124	-0.477476	-0.625759	-0.212457	-0.0217835	-0.0420868	0.035869	-0.035869
XM_005181363	NO	black	-0.385137	-0.190571	-0.700546	-0.62087	-0.18478	-0.32033	-0.812436	-0.37966	-0.434189	-0.33958	-0.886598	-0.488527	-0.0742227	-0.197293	0.196	0.159405	-0.022619	0.553443	0.626199	0.556951	0.87968	0.850097	0.252924	0.488321	-0.0418427	-0.30059	-0.0330369	-0.344125	0.344125
XM_005181403	NO	black	-0.246324	-0.112491	-0.385695	-0.530986	-0.100065	0.133734	-0.409868	-0.292346	-0.420337	-0.61055	-0.800212	-0.744498	-0.241324	-0.219291	0.00572187	0.0402985	-0.219907	0.518159	0.452742	0.258249	0.605904	0.731504	0.529862	0.738388	0.343969	0.158113	-0.067567	-0.320543	0.320543
XM_011293356	NO	black	-0.353467	-0.296774	-0.670674	-0.799586	-0.128361	-0.0812838	-0.48542	-0.197025	-0.298446	-0.540045	-0.76139	-0.590828	-0.0314145	-0.275631	0.398895	0.0285167	-0.146812	0.34667	0.742718	0.517562	0.622634	0.773474	0.4571	0.681773	-0.0440285	-0.164293	0.112772	-0.297181	0.297181
XR_002194383	NO	black	0.35463	0.210318	0.368807	0.556844	0.170288	-0.0416543	0.400699	0.457172	0.403507	0.500085	0.831162	0.760442	0.0106277	-0.120067	-0.0372978	-0.0815152	0.0949667	-0.379926	-0.408285	-0.5004	-0.629965	-0.622467	-0.419392	-0.588583	-0.235832	0.0516672	-0.0481203	0.209621	-0.209621
XM_020036042	NO	black	0.177587	-0.130446	0.549375	0.722066	0.60345	0.366834	0.695785	0.421202	0.279322	0.290844	0.841059	0.548165	-0.0264414	-0.0821577	-0.311037	0.0731976	0.0808354	-0.303225	-0.412998	-0.563632	-0.847557	-0.772046	-0.257982	-0.547429	-0.227797	0.138823	-0.164529	0.112149	-0.112149
XM_005181505	NO	black	-0.366707	-0.349351	-0.29561	-0.263189	-0.067943	0.181363	-0.218766	-0.583355	-0.283252	-0.526931	-0.657762	-0.600914	0.208327	0.401538	-0.103645	0.445615	0.169587	0.275467	0.509354	0.254918	0.450577	0.470921	0.319244	0.410735	0.0377911	-0.0458595	0.0896168	-0.148106	0.148106
XM_011293382	NO	black	0.320215	0.391943	0.437533	0.350603	-0.0886255	-0.0974183	0.335145	0.556873	0.468439	0.527304	0.718951	0.627672	-0.186024	-0.0661386	0.00395932	-0.464445	-0.208814	-0.30825	-0.594936	-0.403044	-0.526697	-0.542247	-0.281639	-0.402057	0.104371	0.245094	0.0219058	0.348431	-0.348431
XM_005181589	NO	black	-0.117893	0.111849	-0.435705	-0.680408	-0.411728	-0.431729	-0.740009	-0.348471	-0.35601	-0.104294	-0.806166	-0.543597	0.176409	0.0584511	0.169878	-0.219286	-0.0653872	0.369553	0.267263	0.841417	0.850802	0.609689	0.32505	0.315926	0.102352	-0.361809	0.222494	-0.281181	0.281181
XM_020036133	NO	black	0.120879	-0.0712294	0.451818	0.770191	0.531186	0.3259	0.661173	0.505845	0.463507	0.304499	0.920366	0.687003	-0.103925	-0.0430759	-0.349478	0.0348646	-0.0182791	-0.449364	-0.455842	-0.651785	-0.878501	-0.712716	-0.338675	-0.486117	-0.080537	0.268672	-0.262123	0.340874	-0.340874
XM_011293486	NO	black	-0.0780855	-0.225196	-0.0618253	0.10223	0.315109	0.0683562	0.259468	0.462253	0.289801	0.148873	0.530584	0.482689	-0.14051	-0.304711	0.121997	-0.0440267	-0.085599	-0.335293	-0.104129	-0.319261	-0.483353	-0.23541	-0.134958	-0.123044	-0.103967	0.0683353	-0.298084	0.121646	-0.121646
XM_020036161	NO	black	0.0127451	-0.237836	0.459634	0.59669	0.515225	0.220804	0.578138	0.374524	0.419389	0.351323	0.819852	0.70264	0.133215	0.023952	-0.193043	0.224994	0.188972	-0.380973	-0.189091	-0.666542	-0.768439	-0.6842	-0.273612	-0.570872	-0.387873	0.127173	0.0284051	0.126577	-0.126577
XR_002194422	NO	black	-0.290035	-0.268958	0.161517	0.406332	0.254828	0.148522	0.357979	-0.229104	0.0996654	0.185417	0.443409	0.38125	0.243252	0.445212	-0.32963	0.525314	0.470344	-0.358436	-0.155382	-0.307891	-0.440055	-0.412665	-0.0967914	-0.366811	-0.130842	0.00530721	0.0415475	0.0778528	-0.0778528
XM_005181842	NO	black	-0.187683	-0.00751679	-0.182391	0.158161	-0.129345	0.0567593	-0.247265	-0.391176	-0.245876	-0.281185	-0.427149	-0.300875	0.0235087	0.181632	-0.232391	0.439009	0.0805516	0.255991	0.0561148	0.148914	0.361962	0.301405	-0.288077	0.139016	0.114087	-0.165129	-0.153964	-0.158646	0.158646
XM_005181862	NO	black	0.0496956	0.129939	-0.0323697	-0.198502	-0.0670108	0.249582	-0.236819	-0.303201	-0.431644	-0.564719	-0.705844	-0.792472	-0.105109	-0.164848	-0.163003	0.0542532	-0.217577	0.464255	0.276965	0.229141	0.503253	0.498203	0.268361	0.544677	0.322817	0.183897	0.0277781	-0.353342	0.353342
XM_020036176	NO	black	-0.319282	-0.130518	-0.608513	-0.787823	-0.35321	-0.280267	-0.69491	-0.473666	-0.352074	-0.365629	-0.924025	-0.613914	0.151619	0.131001	0.258895	0.0320042	-0.0245793	0.425455	0.486039	0.618523	0.856065	0.789075	0.413393	0.547705	0.14289	-0.236209	0.167911	-0.212736	0.212736
XM_005181888	NO	black	-0.60274	-0.348667	-0.264859	-0.297696	-0.0988227	-0.0628467	-0.265528	-0.463711	-0.249462	-0.193087	-0.453963	-0.252191	0.326263	0.238228	0.152315	0.414028	0.280582	0.0221908	0.389298	0.398399	0.373579	0.302779	0.357579	0.175052	-0.154515	-0.238747	0.197203	-0.268844	0.268844
XM_020036208	NO	black	-0.0338319	-0.0827902	-0.227123	-0.470653	-0.34745	-0.0620636	-0.33939	-0.594049	-0.479736	-0.333784	-0.737865	-0.724712	0.194443	0.255156	0.106258	0.0693124	0.115666	0.458924	0.295443	0.537316	0.598958	0.417656	0.344835	0.334932	0.0907838	-0.298092	0.241349	-0.36431	0.36431
XR_002194437	NO	black	0.0874376	0.108774	0.326381	0.130363	0.167267	0.164378	0.342331	0.108486	0.252783	0.186915	0.36784	0.199806	0.0531514	0.267953	-0.493706	-0.167824	-0.000820222	-0.465327	-0.487311	-0.408155	-0.400257	-0.346704	0.172225	-0.114021	0.41954	0.399935	0.0899955	0.287096	-0.287096
XM_005182008	NO	black	0.377638	0.166019	0.249902	0.720949	0.257106	-0.113368	0.16799	0.309759	0.114734	0.501748	0.633244	0.651722	-0.163243	-0.192961	-0.164751	0.0360396	0.1398	-0.290183	-0.483517	-0.247581	-0.411574	-0.529525	-0.709041	-0.682245	-0.279774	-0.244896	-0.464528	0.0751108	-0.0751108
XM_005182042	NO	black	0.0272036	0.216801	-0.383753	-0.433816	-0.395077	-0.144696	-0.550505	-0.369419	-0.532849	-0.323779	-0.743932	-0.635805	-0.381877	-0.122542	0.0898636	-0.175529	-0.142327	0.411982	0.090321	0.478733	0.703691	0.636122	0.288494	0.522407	0.439525	-0.0258775	-0.32461	-0.164808	0.164808
XM_005182046	NO	black	-0.179685	-0.115566	-0.35957	-0.557675	-0.156284	-0.152834	-0.496269	-0.45238	-0.448476	-0.254018	-0.677882	-0.535394	-0.316134	0.107577	0.195722	-0.0879988	-0.000947967	0.325355	0.278602	0.375994	0.600301	0.557653	0.428991	0.447253	0.237175	-0.0361871	-0.255823	-0.0307239	0.0307239
XM_005182048	NO	black	-0.104998	-0.00447975	-0.0500034	0.241693	-0.08549	0.157089	-0.0839447	-0.450003	-0.473491	-0.279286	-0.317968	-0.373702	-0.210711	0.0153371	-0.108384	0.434451	0.139856	0.196176	0.149607	0.160333	0.224223	0.17588	-0.246931	0.125055	0.0122907	-0.0959021	-0.295932	-0.29788	0.29788
XM_005182189	NO	black	-0.0709344	-0.389291	0.275115	0.221253	0.170375	0.0638308	0.491853	-0.105686	0.092871	0.341387	0.593964	0.534492	0.0488477	0.280778	0.119407	0.33357	0.54982	-0.419494	-0.101063	-0.550559	-0.569864	-0.557246	0.025117	-0.460061	-0.333693	0.0213377	-0.0122572	0.0841597	-0.0841597
XM_020036319	NO	black	-0.160483	-0.229581	-0.441504	-0.666008	-0.160471	-0.00688575	-0.296876	-0.12954	-0.107103	-0.482872	-0.639251	-0.58394	0.246254	-0.0578784	0.315844	-0.0486874	-0.124443	-0.0401617	0.616341	0.567051	0.486679	0.547106	0.373075	0.518424	-0.0883038	-0.187177	0.212806	-0.2141	0.2141
XM_005182211	NO	black	-0.0591439	0.139596	-0.456538	-0.712543	-0.322385	-0.171337	-0.559561	-0.415546	-0.400537	-0.405783	-0.833128	-0.712985	0.157293	0.0251032	0.160298	-0.0749141	-0.07889	0.260859	0.35308	0.66438	0.752075	0.691572	0.381632	0.563418	0.258902	-0.147623	0.203376	-0.263674	0.263674
XM_005182350	NO	black	0.147923	0.296145	-0.32262	-0.209505	-0.310504	-0.105083	-0.443109	-0.148041	-0.439801	-0.310793	-0.602167	-0.552546	-0.194067	-0.426886	-0.0423495	-0.0725164	-0.163575	0.251197	0.123268	0.510849	0.583234	0.507833	-0.0525133	0.366487	0.204648	-0.172249	-0.188893	-0.412391	0.412391
XM_005182383	NO	black	0.128534	0.175956	0.347685	0.453243	0.193048	0.123728	0.482229	0.312764	0.409264	0.300645	0.697361	0.524209	0.120255	0.113026	-0.104295	-0.00602716	0.0322005	-0.537195	-0.545874	-0.458351	-0.645656	-0.559912	-0.35125	-0.372045	0.0634264	0.127718	-0.106115	0.251181	-0.251181
XM_020036399	NO	black	0.0658663	-0.143749	-0.0616217	-0.352373	-0.324821	-0.0171503	-0.17854	-0.463327	-0.534827	-0.291582	-0.598361	-0.651156	0.0345814	-0.0146685	0.470359	0.0421148	0.158671	0.268304	0.505975	0.517322	0.46143	0.260291	0.264467	0.220387	-0.288112	-0.323373	0.100726	-0.437442	0.437442
XM_005182529	NO	black	0.188841	0.16031	0.585003	0.67639	0.174069	-0.00663952	0.452188	0.32353	0.293931	0.606906	0.780189	0.646585	-0.0180673	0.0641257	-0.203879	-0.12346	0.141254	-0.357712	-0.599224	-0.360536	-0.622677	-0.771209	-0.28832	-0.695786	-0.160591	0.0612973	-0.100507	0.149724	-0.149724
XM_020036429	NO	black	0.296074	0.192391	0.411363	0.255294	0.0435842	0.0907771	0.548563	0.472564	0.318152	0.337384	0.715138	0.47537	-0.0251666	-0.264807	0.0556336	-0.262753	-0.0294493	-0.303795	-0.397054	-0.498658	-0.657858	-0.577794	-0.0414598	-0.306266	-0.0344818	0.219379	0.137915	0.14144	-0.14144
XM_005182551	NO	black	0.127975	-0.199624	-0.195528	-0.369325	-0.153411	-0.100503	-0.328703	-0.470764	-0.560814	-0.180593	-0.532393	-0.455344	-0.226536	0.0155792	0.210368	0.0221732	0.170003	0.176435	0.404506	0.363468	0.482322	0.344098	0.283645	0.206608	-0.064771	-0.157822	-0.150766	-0.218186	0.218186
XM_020036438	NO	black	-0.435152	-0.271519	-0.648839	-0.729642	-0.133778	-0.0974892	-0.518077	-0.3322	-0.293638	-0.512708	-0.781767	-0.553054	0.0995989	-0.106698	0.275449	0.194286	0.00626568	0.235943	0.661761	0.489767	0.660817	0.770248	0.471405	0.624767	0.0143667	-0.136353	0.0927074	-0.269776	0.269776
XM_020036464	NO	black	-0.485118	-0.463434	-0.429054	-0.642198	0.0997631	0.198516	-0.20968	-0.375263	-0.226203	-0.606928	-0.6754	-0.637771	0.0848597	0.157644	0.0438261	0.204435	-0.0289517	0.393848	0.601045	0.232445	0.412966	0.596584	0.664156	0.656907	0.144959	0.111782	0.209094	-0.142594	0.142594
XM_005182687	NO	black	-0.393009	-0.304284	-0.654971	-0.49731	0.108352	0.162746	-0.409785	-0.156306	-0.207569	-0.731821	-0.748599	-0.605592	-0.130353	-0.19271	0.162887	0.172382	-0.276465	0.479473	0.661799	0.319343	0.544447	0.818287	0.342342	0.762615	0.127014	0.0468144	-0.171297	-0.0913611	0.0913611
XM_005182686	NO	black	0.042738	-0.207544	0.574767	0.719805	0.517921	0.381034	0.734531	0.284395	0.277789	0.248144	0.797242	0.52072	0.0847692	0.0101759	-0.181524	0.245236	0.178243	-0.555756	-0.336408	-0.594032	-0.847695	-0.778225	-0.344972	-0.529763	-0.282051	0.0999766	-0.178449	0.0993544	-0.0993544
XR_002194516	NO	black	-0.351608	-0.408033	0.0905609	-0.115237	0.0752396	0.154153	-0.037351	-0.377401	0.0497056	-0.223261	-0.387566	-0.330147	0.327573	0.597652	-0.180889	0.239145	0.145388	-0.0286452	0.390053	0.0751856	0.218734	0.121965	0.326925	0.103514	-0.116577	0.04857	0.295806	0.0409224	-0.0409224
XM_005182717	NO	black	0.263874	0.151591	0.481832	0.586663	0.231696	0.194518	0.492244	0.473792	0.491455	0.337284	0.735486	0.549014	0.0626476	0.101013	-0.420752	-0.155124	-0.0931169	-0.299542	-0.434177	-0.477138	-0.641997	-0.603206	-0.223188	-0.441829	-0.00010199	0.285791	0.102879	0.357071	-0.357071
XM_020036510	NO	black	-0.286522	-0.262596	-0.11101	-0.1658	0.0347634	0.211547	-0.186065	-0.587388	-0.315702	-0.477319	-0.647839	-0.675994	0.237152	0.411351	-0.180727	0.359468	0.110707	0.0554467	0.409798	0.359863	0.420061	0.358393	0.190048	0.336523	0.0554601	-0.0829831	0.0499703	-0.157337	0.157337
XR_002194526	NO	black	0.29704	0.0283882	0.648839	0.711962	0.374364	0.412768	0.824344	0.445271	0.307869	0.268461	0.912024	0.512426	-0.129824	-0.134211	-0.262447	-0.0393024	0.03126	-0.446442	-0.476723	-0.670176	-0.926461	-0.812126	-0.203809	-0.45023	-0.0601702	0.331993	-0.1269	0.177253	-0.177253
XM_005182916	NO	black	-0.107185	0.0723566	-0.53517	-0.665532	-0.330145	-0.0708128	-0.541173	-0.393783	-0.467791	-0.533086	-0.848102	-0.716827	-0.177337	-0.14466	0.162368	-0.00337523	-0.133943	0.405761	0.402864	0.441757	0.741433	0.8109	0.421632	0.72371	0.386177	0.0648477	-0.0575271	-0.252045	0.252045
XM_020036554	NO	black	-0.0986416	-0.185547	-0.238486	-0.444461	-0.291591	0.0129647	-0.262659	-0.462435	-0.452948	-0.446854	-0.696176	-0.711588	0.0361401	-0.057133	0.335475	0.113268	0.0674407	0.26442	0.651393	0.475621	0.526702	0.452755	0.303889	0.424597	-0.175464	-0.242191	0.174982	-0.394457	0.394457
XM_020036555	NO	black	0.077481	0.0298495	-0.13126	-0.269055	-0.305946	0.00446158	-0.243211	-0.487002	-0.619448	-0.305448	-0.556793	-0.6083	-0.378478	-0.0732377	0.295177	0.0497984	0.0672401	0.483054	0.136103	0.247181	0.445004	0.365934	0.172423	0.35832	0.198827	-0.0622271	-0.347807	-0.262062	0.262062
XR_891518	NO	black	0.123872	-0.204598	0.621154	0.65102	0.659913	0.39048	0.715009	0.282928	0.102769	0.288742	0.77596	0.42488	-0.0427109	-0.129917	-0.304363	0.101769	0.196828	-0.347488	-0.361354	-0.534847	-0.833406	-0.801405	-0.0554768	-0.534157	-0.258666	0.117443	-0.164536	-0.0451264	0.0451264
XM_005183043	NO	black	0.247214	0.232273	0.550073	0.692509	0.0351104	-0.116414	0.405141	0.189526	0.247644	0.650355	0.762592	0.707296	0.110767	0.111671	-0.0779677	0.0801245	0.293015	-0.338937	-0.590369	-0.427014	-0.569066	-0.766082	-0.559126	-0.785406	-0.272111	-0.0875381	-0.0393841	0.124344	-0.124344
XM_005183071	NO	black	0.0650243	0.255165	-0.197804	-0.19874	-0.334101	-0.0395998	-0.403935	-0.348293	-0.292494	-0.389024	-0.704911	-0.598556	0.110015	0.0230489	0.0214504	0.0967673	-0.147531	0.353009	0.210907	0.36129	0.622217	0.522317	-0.0611897	0.386075	0.219027	-0.0652024	0.0685346	-0.195892	0.195892
XM_005183191	NO	black	0.526848	0.279991	0.712009	0.738369	0.0446288	0.085473	0.57605	0.130962	0.0350838	0.526778	0.789188	0.519164	-0.21107	-0.00112081	-0.135593	-0.0402406	0.259074	-0.383829	-0.625368	-0.516844	-0.665182	-0.831905	-0.452687	-0.679727	-0.120281	0.0431535	-0.158653	0.0294568	-0.0294568
XM_020036652	NO	black	-0.509316	-0.394625	-0.199705	-0.192897	0.0413695	0.0536044	-0.101424	-0.292104	-0.288887	-0.239624	-0.300039	-0.225396	-0.0435388	-0.0227318	0.285711	0.401141	0.204429	0.531883	0.455066	0.140366	0.200461	0.229714	0.221618	0.168761	-0.324856	-0.187068	0.0868985	-0.378629	0.378629
XM_005183250	NO	black	0.290968	0.316425	0.203115	-0.0307913	-0.0737268	0.158547	-0.117698	0.0479572	0.0578039	-0.29243	-0.415855	-0.500151	0.337499	-0.0088864	-0.348198	-0.190801	-0.359639	0.325701	0.0707204	0.129361	0.311268	0.210953	0.0330711	0.233316	0.225292	0.169853	0.43518	-0.125072	0.125072
XM_020036656	NO	black	0.00459489	0.112555	0.0911011	0.105403	-0.103534	-0.0208577	0.125835	0.262507	0.441128	0.134442	0.297357	0.302555	0.269412	0.162287	-0.015404	-0.160184	-0.129468	-0.290691	-0.00932649	-0.00841302	-0.19633	-0.14802	0.039558	-0.0905187	-0.00172484	0.182471	0.30878	0.36978	-0.36978
XM_020036682	NO	black	0.14847	-0.148537	0.282353	0.460793	0.259139	0.121488	0.455562	0.337379	0.34434	0.265275	0.682541	0.55246	0.153675	-0.0207581	0.101174	0.112519	0.107987	-0.506757	-0.16481	-0.295791	-0.603558	-0.541291	-0.403464	-0.449903	-0.327971	-0.0319722	-0.153017	0.196964	-0.196964
XR_891527	NO	black	0.0961131	-0.151412	0.557133	0.611425	0.600324	0.354864	0.727673	0.357013	0.250198	0.299852	0.827716	0.480363	-0.0740297	-0.034974	-0.250882	0.0125443	0.0992668	-0.334673	-0.432799	-0.540932	-0.869889	-0.786413	-0.138466	-0.49374	-0.174505	0.153738	-0.156928	0.119685	-0.119685
XM_020036697	NO	black	-0.164426	-0.34936	-0.168635	-0.324677	-0.0103885	0.0210154	-0.100102	-0.261292	-0.416384	-0.220059	-0.330982	-0.402938	-0.0267028	-0.178581	0.35732	0.0637964	0.0910627	0.339946	0.456933	0.425732	0.217398	0.177018	0.318708	0.193206	-0.282176	-0.324424	0.0917265	-0.382136	0.382136
XM_005183389	NO	black	0.236896	0.0629324	0.130212	0.23076	-0.0242025	-0.158815	0.266083	0.182155	0.0333601	0.4707	0.657032	0.68932	-0.303863	-0.213609	0.237958	0.0080982	0.293123	-0.417336	-0.314757	-0.459826	-0.459933	-0.426452	-0.178496	-0.416376	-0.142849	0.0425255	-0.2674	0.0823193	-0.0823193
XM_020036710	NO	black	0.367014	0.296769	0.328381	0.252889	0.0404296	-0.130278	0.0585037	0.186465	0.136264	0.314782	0.269112	0.239307	-0.0489097	0.0261835	0.0455304	-0.223345	-0.0774239	0.157576	-0.120902	-0.0778496	-0.131396	-0.282224	-0.335515	-0.351034	-0.229404	-0.0303906	0.182061	0.158182	-0.158182
XM_011294184	NO	black	0.0925419	-0.265597	0.142748	-0.139879	0.132765	-0.0413129	0.2174	-0.0663224	0.115643	0.225116	0.30774	0.256513	0.160231	0.319122	0.203442	-0.0306091	0.288284	-0.092381	0.167398	-0.1625	-0.265513	-0.27816	0.33667	-0.231806	-0.285379	0.0400041	0.287037	0.219489	-0.219489
XM_020036709	NO	black	-0.14766	-0.064339	-0.156243	-0.565069	-0.355197	-0.0785788	-0.29069	-0.550233	-0.477226	-0.304614	-0.678146	-0.680063	0.00564905	0.146803	0.235083	0.0395564	0.112481	0.393346	0.39596	0.451797	0.539048	0.398365	0.344334	0.380167	0.00842996	-0.214525	0.363417	-0.346811	0.346811
XM_011294192	NO	black	0.0780049	-0.146829	0.166142	0.110757	0.340277	-0.0567397	0.225046	0.587214	0.503014	0.374445	0.571472	0.590591	-0.0256845	-0.179135	0.000598378	-0.341581	-0.15598	-0.166034	-0.0761351	-0.42856	-0.464218	-0.35768	0.0229381	-0.299137	-0.223905	0.16992	0.0523668	0.412763	-0.412763
XM_005183448	NO	black	-0.293899	-0.116631	-0.42483	-0.397372	-0.179362	-0.0811329	-0.496321	-0.538194	-0.374713	-0.406759	-0.755888	-0.614093	0.172688	0.186586	-0.0451907	0.276499	0.069091	0.270132	0.434958	0.560938	0.652718	0.584873	0.130038	0.401884	0.0586747	-0.293446	0.126545	-0.243455	0.243455
XM_011294216	NO	black	-0.262691	-0.0669947	-0.544859	-0.767455	-0.453883	-0.235671	-0.588884	-0.369019	-0.261145	-0.385605	-0.838612	-0.594569	0.0763482	0.0414587	0.347073	-0.0598499	-0.0728368	0.253664	0.518129	0.538974	0.766235	0.749446	0.469914	0.59857	0.155088	-0.103138	0.141799	-0.149963	0.149963
XM_011294218	NO	black	-0.00690168	0.221846	-0.469507	-0.606876	-0.488389	-0.325351	-0.685824	-0.335179	-0.348516	-0.249517	-0.811555	-0.565801	-0.0871279	0.034087	0.203594	-0.197796	-0.14422	0.496161	0.237212	0.6054	0.831709	0.709189	0.246996	0.468411	0.281924	-0.116667	0.0179787	-0.118962	0.118962
XM_005183530	NO	black	-0.0849966	0.204887	-0.581385	-0.698909	-0.349918	-0.377941	-0.813405	-0.258407	-0.249528	-0.271193	-0.851003	-0.50333	-0.015209	-0.0697946	0.100538	-0.189881	-0.243794	0.509129	0.345446	0.529901	0.888127	0.836239	0.251928	0.544598	0.303183	-0.0945921	0.161893	-0.0892469	0.0892469
XM_011294244	NO	black	0.34837	0.172858	0.695714	0.752167	0.0814072	0.119227	0.527788	0.0945595	0.0621293	0.466306	0.68937	0.471388	0.000665491	0.0430113	-0.189278	0.119981	0.249594	-0.376663	-0.526539	-0.472964	-0.60043	-0.770017	-0.476197	-0.65664	-0.154889	0.0526919	-0.11009	-0.0327506	0.0327506
XR_891538	NO	black	0.068873	-0.15173	0.478661	0.604829	0.551617	0.416457	0.703222	0.43485	0.355593	0.20583	0.810661	0.479244	-0.0511721	-0.00215763	-0.355567	-0.00994465	0.00501826	-0.482637	-0.385333	-0.521349	-0.852255	-0.69947	-0.109945	-0.389942	-0.0828781	0.244443	-0.172615	0.251908	-0.251908
XM_005183599	NO	black	0.235219	0.122366	0.599295	0.672473	0.264344	0.0966449	0.610454	0.278374	0.238476	0.53558	0.880366	0.67414	-0.00338123	0.0443207	-0.130946	0.034214	0.238718	-0.396392	-0.513666	-0.474937	-0.766279	-0.842639	-0.341119	-0.702072	-0.280436	0.0161144	0.0420079	0.0864302	-0.0864302
XM_005183612	NO	black	-0.175211	0.212715	-0.251885	-0.257289	-0.131258	-0.133911	-0.4924	-0.143142	-0.275904	-0.206703	-0.629137	-0.494902	0.0343814	-0.144976	-0.186553	-0.0714603	-0.216857	0.262074	0.0245568	0.514379	0.576536	0.459533	0.00189515	0.300851	0.224544	-0.169905	-0.0212676	-0.206084	0.206084
XM_020036788	NO	black	-0.244915	-0.193608	-0.5543	-0.664283	0.07598	-0.0403567	-0.354771	0.16102	0.12013	-0.361752	-0.445706	-0.264221	0.120904	-0.131179	0.106375	-0.182962	-0.309737	0.270294	0.421274	0.240328	0.371848	0.595535	0.498548	0.537585	0.150854	0.130266	0.14479	0.056171	-0.056171
XM_005183668	NO	black	0.247204	0.401823	-0.193486	-0.164713	-0.234212	-0.0586256	-0.4124	-0.0465447	-0.386922	-0.283925	-0.55936	-0.542131	-0.21617	-0.417297	-0.0675656	-0.22685	-0.336973	0.47946	0.0477312	0.448712	0.535177	0.4563	0.0223418	0.358916	0.269576	-0.0907894	-0.055793	-0.334052	0.334052
XM_005183679	NO	black	0.15587	0.0450523	0.528089	0.650107	0.378763	0.237159	0.651694	0.464684	0.361701	0.373686	0.821793	0.53967	0.125318	-0.0607044	-0.187957	-0.086615	0.0206975	-0.527459	-0.521154	-0.351361	-0.799898	-0.787789	-0.261977	-0.551021	-0.181492	0.0464708	-0.0942237	0.168753	-0.168753
XM_005183680	NO	black	-0.124965	-0.00411379	-0.237269	-0.164941	-0.111895	0.128103	-0.377131	-0.401042	-0.49408	-0.496549	-0.734063	-0.681133	-0.183448	-0.138749	-0.143028	0.160712	-0.0846897	0.493693	0.290698	0.247764	0.57761	0.561948	0.276642	0.491583	0.257852	0.0254014	-0.198865	-0.339402	0.339402
XM_020036811	NO	black	0.00216252	-0.131761	0.320989	0.600969	0.400332	0.338627	0.643268	0.470265	0.380085	0.158299	0.751872	0.504716	0.0926206	-0.105742	-0.135618	0.128489	-0.0187584	-0.506317	-0.364523	-0.388014	-0.779368	-0.617894	-0.40482	-0.380343	-0.171877	0.0616397	-0.208321	0.150236	-0.150236
XM_005183683	NO	black	-0.279804	-0.136613	-0.517861	-0.681957	-0.229515	-0.0735237	-0.554903	-0.43515	-0.336492	-0.505276	-0.866708	-0.691239	0.0271565	0.0613914	0.0638302	0.0383556	-0.0745445	0.352981	0.575927	0.45781	0.735514	0.770523	0.536655	0.654036	0.208708	-0.026421	0.151587	-0.174315	0.174315
XM_005183695	NO	black	-0.217892	0.128468	-0.621197	-0.58258	-0.465998	-0.329828	-0.777155	-0.353799	-0.370653	-0.322053	-0.877987	-0.563351	-0.0474231	-0.0882951	0.142331	-0.0313951	-0.131204	0.353152	0.304957	0.665541	0.890508	0.814138	0.18079	0.531322	0.272292	-0.218517	-0.0854541	-0.224796	0.224796
XR_002194609	NO	black	0.435844	0.44868	0.16765	0.230863	-0.173153	-0.062555	0.294135	0.220462	0.224139	0.290144	0.512942	0.372057	-0.0606888	0.0285414	0.0284413	-0.270738	-0.016912	-0.506464	-0.515003	-0.20662	-0.398463	-0.373472	-0.25995	-0.231886	0.19235	0.0770543	-0.0739083	0.39649	-0.39649
XM_020036815	NO	black	0.0154455	-0.214773	-0.236185	-0.169324	0.116428	-0.0169051	-0.301192	-0.223216	-0.549465	-0.195027	-0.384951	-0.271347	-0.435388	-0.395527	0.126261	0.0878663	0.0825586	0.554826	0.432	0.109332	0.358452	0.344608	0.330563	0.192511	-0.17666	-0.101677	-0.228209	-0.39779	0.39779
XR_891540	NO	black	0.0153739	-0.0251862	0.213434	0.598877	0.0665734	-0.0186312	0.3843	0.0346504	0.128251	0.369689	0.687039	0.657826	-0.108382	0.0331764	0.0242063	0.408202	0.412839	-0.310331	-0.201988	-0.445022	-0.535874	-0.525214	-0.546986	-0.545897	-0.368828	-0.102514	-0.128225	0.0061269	-0.0061269
XM_005183759	NO	black	0.121788	-0.249684	0.410778	0.569778	0.608948	0.441906	0.720724	0.454593	0.347263	0.143703	0.8359	0.517997	-0.0867857	-0.139015	-0.291818	0.0821663	0.0102152	-0.314046	-0.273306	-0.703051	-0.882212	-0.640704	-0.126685	-0.334278	-0.100141	0.306859	-0.180912	0.183199	-0.183199
XM_005183765	NO	black	-0.214574	0.0800773	-0.491474	-0.608033	-0.304586	-0.229288	-0.680552	-0.284081	-0.214522	-0.384367	-0.898263	-0.66689	0.199021	0.0238769	0.0832861	-0.0939225	-0.240362	0.398812	0.420037	0.667069	0.829541	0.74909	0.191133	0.531677	0.161853	-0.210264	0.198377	-0.137775	0.137775
XM_005183826	NO	black	-0.24158	0.0429216	-0.651876	-0.710806	-0.487364	-0.427624	-0.816579	-0.3388	-0.346101	-0.254008	-0.868745	-0.489058	0.0241177	-0.0895056	0.326854	-0.0508833	-0.0581984	0.386667	0.500756	0.725438	0.920948	0.814954	0.304574	0.475593	0.0457315	-0.294354	0.0974522	-0.260334	0.260334
XM_005183829	NO	black	-0.306379	-0.0852401	-0.637205	-0.728529	-0.349894	-0.387705	-0.809254	-0.366443	-0.388453	-0.266025	-0.892026	-0.532452	-0.0470153	-0.0685952	0.278533	-0.0475891	-0.0451591	0.523884	0.515993	0.680161	0.905098	0.802225	0.374132	0.474119	0.0190192	-0.319852	0.0532265	-0.287458	0.287458
XM_005183830	NO	black	-0.28363	-0.0055868	-0.737238	-0.662387	-0.365314	-0.341101	-0.815536	-0.259497	-0.299257	-0.359824	-0.854644	-0.462455	-0.0941097	-0.175904	0.256332	0.00604335	-0.154255	0.464674	0.53579	0.586809	0.885089	0.898162	0.248225	0.572443	0.112328	-0.197491	-0.0283368	-0.199416	0.199416
XM_005183836	NO	black	-0.240619	-0.229517	-0.662611	-0.751343	-0.0936901	-0.174658	-0.660267	-0.273581	-0.390078	-0.451306	-0.860824	-0.646617	-0.0490106	-0.199573	0.211157	-0.0582141	-0.147369	0.458708	0.620337	0.6373	0.770356	0.804318	0.454111	0.601915	0.0455605	-0.2345	-0.015439	-0.289383	0.289383
XR_891545	NO	black	0.117488	-0.08382	0.362295	0.468619	0.27756	0.244246	0.64623	0.471416	0.372207	0.274713	0.818147	0.524623	-0.0565658	-0.0982324	-0.0635412	-0.100826	0.0225694	-0.522242	-0.330542	-0.391579	-0.792614	-0.658268	-0.142123	-0.382096	-0.159183	0.149535	-0.153644	0.223525	-0.223525
XM_020036897	NO	black	0.174967	0.199711	0.537245	0.609878	0.0908971	-0.0792615	0.433566	0.360286	0.454541	0.661044	0.853588	0.791045	0.0157817	0.203691	-0.188184	-0.113729	0.121805	-0.271894	-0.648605	-0.520961	-0.652724	-0.757184	-0.40499	-0.703406	-0.11644	0.084944	0.0507412	0.340822	-0.340822
XM_020036899	NO	black	0.203691	0.157661	0.34718	0.425633	0.182897	0.0562089	0.467943	0.650219	0.666768	0.393865	0.841983	0.729794	0.101643	-0.0525867	-0.0622466	-0.207488	-0.158265	-0.386341	-0.400579	-0.527319	-0.695604	-0.560884	-0.324699	-0.405926	-0.064704	0.256814	0.0788873	0.413559	-0.413559
XM_020036919	NO	black	0.304023	0.0802639	0.302786	0.108312	0.0982896	0.0215761	0.347569	0.249456	0.211888	0.341156	0.509305	0.338268	0.0678471	-0.00397645	-0.203483	-0.250251	0.0950454	-0.360479	-0.425276	-0.39642	-0.457291	-0.458657	0.105527	-0.297017	0.103603	0.15063	0.0462787	0.0862367	-0.0862367
XM_005184040	NO	black	-0.354812	-0.214521	-0.513632	-0.466973	-0.204151	-0.156786	-0.563336	-0.703068	-0.537025	-0.363163	-0.817967	-0.597065	0.0628159	0.227446	0.0634198	0.358565	0.203169	0.430427	0.454818	0.515192	0.723143	0.636615	0.215274	0.394113	0.0545287	-0.301535	0.00281315	-0.290847	0.290847
XM_020036950	NO	black	-0.175086	-0.100778	-0.320308	-0.600293	-0.416392	-0.165966	-0.456144	-0.624628	-0.41037	-0.285539	-0.75378	-0.626992	0.112354	0.372643	0.0865606	0.0824497	0.112558	0.417937	0.412902	0.518507	0.676495	0.532678	0.355585	0.393623	0.131241	-0.158049	0.343323	-0.201487	0.201487
XM_005184060	NO	black	0.251885	0.173876	0.693862	0.616926	0.0403288	-0.111572	0.457184	0.155969	0.208497	0.734934	0.796748	0.657531	0.030983	0.219435	-0.0817409	-0.102775	0.296995	-0.389575	-0.57537	-0.341974	-0.614004	-0.878684	-0.366832	-0.824595	-0.301572	-0.0940136	0.0833049	0.139248	-0.139248
XM_020036979	NO	black	-0.280085	-0.145856	-0.487169	-0.768363	-0.348269	-0.100516	-0.379508	-0.402802	-0.26132	-0.421839	-0.705365	-0.637276	-0.00533266	0.174611	0.274923	-0.0790101	-0.0535135	0.346459	0.486588	0.507098	0.576954	0.625531	0.545585	0.616574	0.194637	-0.0355696	0.232757	-0.0774859	0.0774859
XR_002194645	NO	black	-0.183927	-0.147314	0.0502932	0.134754	0.0531757	0.00980095	0.210813	0.145297	0.417725	0.17586	0.443098	0.531092	0.0144691	0.255214	-0.00951793	0.176806	0.0755631	-0.310029	0.0278416	-0.490858	-0.353428	-0.183698	-0.188449	-0.14621	-0.0660428	0.273055	0.11848	0.384163	-0.384163
XM_005184213	NO	black	-0.185229	0.13681	-0.686182	-0.72826	-0.498388	-0.430858	-0.818008	-0.388519	-0.354647	-0.291377	-0.903973	-0.5425	0.104789	-0.0507947	0.293904	-0.0228632	-0.0789744	0.37665	0.415061	0.738938	0.937632	0.842043	0.177426	0.511055	0.152345	-0.305018	0.118188	-0.227756	0.227756
XR_891551	NO	black	0.329327	0.264901	0.697824	0.663325	0.206951	0.0622338	0.541814	0.342548	0.40233	0.57286	0.809295	0.600101	0.14031	0.238257	-0.243223	-0.165148	0.0735736	-0.465122	-0.692001	-0.406648	-0.689108	-0.840025	-0.441311	-0.705869	-0.100689	0.0662407	0.0492628	0.217672	-0.217672
XM_005184228	NO	black	-0.0397633	0.0351896	-0.129237	-0.224955	-0.261592	-0.00474525	-0.130484	-0.396663	-0.267541	-0.285429	-0.439713	-0.480065	0.268504	0.0869505	0.0485681	0.218598	0.112593	0.236143	0.267145	0.329583	0.332653	0.237131	0.0148128	0.209951	-0.0607749	-0.293931	0.39774	-0.31566	0.31566
XM_005184240	NO	black	-0.277983	-0.149244	-0.41993	-0.719742	-0.221695	-0.0165295	-0.436146	-0.323553	-0.0287838	-0.482826	-0.750678	-0.612377	0.162419	0.34632	-0.0179357	-0.0700912	-0.208219	0.315802	0.511352	0.301442	0.610021	0.706807	0.53498	0.674955	0.355137	0.219741	0.319164	0.145837	-0.145837
XM_020037004	NO	black	0.30748	0.349332	0.383547	0.313176	-0.0106528	-0.000351001	0.140663	0.399197	0.176092	0.276947	0.285362	0.168173	-0.019278	-0.253969	-0.132812	-0.400381	-0.260485	-0.0879056	-0.432044	-0.155103	-0.215448	-0.311616	-0.10985	-0.226254	0.130343	0.158428	-0.118351	-0.000506779	0.000506779
XR_002194653	NO	black	0.238976	-0.0029836	0.624438	0.641623	0.316242	0.142039	0.652543	0.348414	0.359358	0.498605	0.880403	0.642312	0.122011	0.112196	-0.121462	-0.0262726	0.194963	-0.45404	-0.368976	-0.432839	-0.796224	-0.870339	-0.332493	-0.708476	-0.411632	-0.0106394	0.13397	0.196045	-0.196045
XM_020037011	NO	black	-0.122428	0.0386105	-0.339677	-0.568113	-0.340007	-0.264923	-0.607795	-0.344579	-0.229485	-0.212285	-0.778336	-0.542307	-0.0154078	0.23628	0.0649162	-0.17612	-0.131518	0.612843	0.340901	0.477955	0.757772	0.606054	0.29245	0.37996	0.135178	-0.113021	0.240766	-0.0662449	0.0662449
XM_011294542	NO	black	-0.25692	-0.376879	-0.375074	-0.689822	-0.0559096	0.13876	-0.290676	-0.341954	-0.265795	-0.609571	-0.725406	-0.695388	-0.0651713	0.0395593	0.257182	0.0526876	-0.110945	0.333355	0.756372	0.245454	0.502153	0.657598	0.598713	0.702043	0.0832128	0.149776	0.107164	-0.095154	0.095154
XM_020037020	NO	black	-0.0803787	0.225842	-0.5409	-0.506814	-0.475553	-0.26095	-0.736815	-0.265342	-0.283207	-0.394704	-0.88583	-0.611066	-0.0687166	-0.100989	0.119534	-0.0954796	-0.279241	0.540901	0.397233	0.600098	0.888218	0.832232	0.0929843	0.571058	0.249128	-0.101041	0.0440258	-0.114986	0.114986
XM_005184365	NO	black	0.145575	-0.112802	0.174585	0.423231	0.22669	0.0388882	0.37429	0.0209791	-0.203696	0.308395	0.622474	0.548301	-0.468584	-0.304363	0.23768	0.261708	0.382095	-0.314987	-0.250778	-0.478427	-0.532408	-0.465717	-0.274129	-0.402699	-0.240868	-0.067479	-0.510872	-0.0910955	0.0910955
XM_005184356	NO	black	-0.440856	-0.316566	-0.518764	-0.725776	-0.0883129	-0.0630836	-0.415017	-0.124553	0.0353829	-0.418736	-0.664279	-0.46311	0.218762	0.17844	0.223158	-0.0876348	-0.212884	0.395269	0.572458	0.412679	0.530123	0.637256	0.506572	0.562719	0.0389303	-0.0161651	0.276471	0.138881	-0.138881
XM_020037063	NO	black	0.231914	0.296005	0.268216	0.496065	0.19999	0.0878594	0.393987	0.567468	0.370211	0.325228	0.688286	0.559411	-0.0944227	-0.291052	-0.236064	-0.167057	-0.181747	-0.149198	-0.69174	-0.535757	-0.593702	-0.474055	-0.387562	-0.327375	0.195823	0.210068	-0.225568	0.153184	-0.153184
XM_005184447	NO	black	-0.285245	-0.41017	-0.213916	0.257315	0.362332	0.0523561	0.176875	0.206189	0.498679	0.0547128	0.410293	0.535316	0.376455	0.200002	-0.0556381	0.394609	0.142401	-0.426817	0.0872625	-0.221756	-0.36579	-0.162383	-0.316312	-0.234072	-0.290618	-0.122968	-0.0957405	0.339288	-0.339288
XM_020037056	NO	black	-0.127009	0.218325	-0.391534	-0.303451	-0.32486	-0.180325	-0.566406	-0.327806	-0.356816	-0.2554	-0.682507	-0.462226	-0.325097	-0.00706579	-0.0408585	-0.0644717	-0.166138	0.306569	-0.000364771	0.351152	0.662667	0.612957	0.0564776	0.443178	0.463689	0.00141676	-0.309832	-0.0553203	0.0553203
XM_005184449	NO	black	0.062274	-0.0785939	0.104413	0.300349	0.0871188	-0.180593	0.220859	0.405339	0.580024	0.477934	0.666369	0.775521	0.215413	0.167175	0.11218	-0.0622722	0.121652	-0.53133	-0.205666	-0.24726	-0.45419	-0.444072	-0.272463	-0.516298	-0.306171	-0.0424536	-0.0435408	0.433601	-0.433601
XM_020037074	NO	black	0.417825	0.292732	0.680486	0.672053	0.0374707	-0.043347	0.467301	0.353799	0.31864	0.628403	0.795632	0.639526	-0.0116948	0.031332	-0.189707	-0.165099	0.0892036	-0.234597	-0.561916	-0.444422	-0.610841	-0.797833	-0.507065	-0.731124	-0.214835	0.0388885	0.144289	0.158798	-0.158798
XM_005184476	NO	black	-0.250201	-0.0933382	-0.718544	-0.778062	-0.366288	-0.28607	-0.756135	-0.3595	-0.3839	-0.416285	-0.895326	-0.575894	-0.105356	-0.100722	0.316365	-0.0081264	-0.125523	0.530779	0.566234	0.578654	0.87325	0.89655	0.351969	0.638224	0.158861	-0.169952	-0.0069055	-0.197838	0.197838
XM_005184486	NO	black	-0.237372	0.107594	-0.597294	-0.670405	-0.356491	-0.359573	-0.809884	-0.321632	-0.272099	-0.276076	-0.879854	-0.54561	0.0497048	0.0601404	0.138068	-0.140424	-0.197784	0.373362	0.35934	0.7259	0.89669	0.808364	0.269612	0.515292	0.242156	-0.184742	0.060426	-0.0599719	0.0599719
XM_020037084	NO	black	-0.375852	-0.413302	-0.0630306	0.133627	0.28557	-0.00497649	0.106027	0.0966407	0.138627	0.170541	0.248077	0.372214	-0.271694	0.108723	0.138166	0.128784	0.150828	-0.153823	-0.0126709	-0.227995	-0.23955	-0.157433	0.0295193	-0.190322	-0.233942	-0.00605318	-0.442707	0.255125	-0.255125
XM_020037120	NO	black	-0.364364	-0.185808	-0.493257	-0.715982	-0.238965	0.00396918	-0.468627	-0.356281	-0.17753	-0.575764	-0.880523	-0.740068	0.0808139	0.200023	0.122603	-0.027961	-0.224229	0.359873	0.532524	0.450316	0.685759	0.764331	0.483305	0.727956	0.282765	0.0442924	0.173249	-0.0389055	0.0389055
XR_891558	NO	black	0.0629238	-0.106418	0.531176	0.604961	0.317341	0.264022	0.763281	0.330698	0.42487	0.3696	0.915309	0.628925	0.111227	0.149317	-0.186637	0.0899528	0.201083	-0.544219	-0.399649	-0.566655	-0.895758	-0.826602	-0.23115	-0.5555	-0.231167	0.13243	0.0714587	0.212087	-0.212087
XM_011294684	NO	black	0.113039	-0.252924	0.44981	0.388901	0.482666	0.273848	0.610734	0.388166	0.238695	0.284383	0.770182	0.535553	-0.176926	-0.157049	-0.11473	-0.0141592	0.115126	-0.242565	-0.162348	-0.661083	-0.763666	-0.632476	0.040682	-0.394472	-0.262528	0.2321	-0.0335282	0.0649975	-0.0649975
XM_005184648	NO	black	0.251454	0.442985	0.355668	0.563917	-0.112672	-0.256081	0.199659	0.248464	0.251055	0.683527	0.702659	0.719215	-0.0184876	0.0651896	-0.217627	-0.104959	0.118815	-0.428287	-0.773283	-0.242073	-0.430217	-0.599393	-0.624754	-0.65653	0.0492145	-0.065595	-0.0781174	0.21472	-0.21472
XM_005184645	NO	black	0.0238328	-0.12563	0.324673	0.56844	0.43723	0.205437	0.617626	0.416348	0.419342	0.342145	0.901883	0.753526	0.0922472	-0.0283742	-0.114714	0.172127	0.156478	-0.510866	-0.425612	-0.590004	-0.835092	-0.677204	-0.30525	-0.503757	-0.169822	0.119484	-0.14331	0.184545	-0.184545
XM_005184646	NO	black	-0.386991	-0.324686	-0.536244	-0.798693	-0.0129143	-0.0626562	-0.364264	-0.161836	-0.0821052	-0.404078	-0.594492	-0.421041	0.0870716	-0.00903632	0.240801	-0.0230222	-0.139636	0.285352	0.501865	0.207888	0.447962	0.6219	0.520843	0.595317	0.132183	0.00604339	0.202968	-0.0975828	0.0975828
XM_020037166	NO	black	0.399733	0.417425	0.267785	0.0980615	-0.0760316	0.0340361	0.278172	0.434594	0.471149	0.209618	0.412491	0.285977	0.0361338	0.0284544	-0.201429	-0.482786	-0.292278	-0.182171	-0.494273	-0.453278	-0.35639	-0.267806	0.0175529	-0.0623384	0.406293	0.438151	0.158296	0.460004	-0.460004
XM_005184779	NO	black	0.258262	0.154441	0.394953	0.410956	0.263295	0.136552	0.533038	0.647045	0.450263	0.394752	0.800977	0.5724	-0.056404	-0.158152	-0.184478	-0.366269	-0.182527	-0.401265	-0.626322	-0.37949	-0.718974	-0.63848	-0.164311	-0.401566	0.0730677	0.193636	-0.0821124	0.19866	-0.19866
XR_002194691	NO	black	0.385025	0.279661	0.678559	0.784734	0.114113	0.129191	0.588116	0.311472	0.303744	0.510313	0.845361	0.602197	-0.0647877	0.101802	-0.240806	-0.102212	0.0685641	-0.448873	-0.689035	-0.510711	-0.724786	-0.813786	-0.479415	-0.635567	-0.00282938	0.186175	-0.154866	0.286244	-0.286244
XM_005184829	NO	black	-0.149808	0.126497	-0.251101	-0.197971	-0.288766	0.0198174	-0.360635	-0.416309	-0.331242	-0.374086	-0.633477	-0.590142	-0.0844553	0.194139	-0.094585	0.0919161	-0.149917	0.430965	0.0405677	0.364899	0.527818	0.489198	0.0192354	0.430775	0.421006	-0.0210864	-0.111552	-0.139865	0.139865
XR_225625	NO	black	-0.316628	-0.175931	-0.531823	-0.447671	-0.402188	-0.168528	-0.530558	-0.471465	-0.451844	-0.414368	-0.781365	-0.562381	0.00361189	-0.112396	0.342975	0.290755	0.0924814	0.370286	0.620763	0.551974	0.715616	0.667736	0.143863	0.44621	-0.12262	-0.316644	-0.0186122	-0.394457	0.394457
XM_005184930	NO	black	0.0976604	0.0766559	-0.0739645	-0.466562	-0.497857	-0.162053	-0.219376	-0.602128	-0.623306	-0.114104	-0.539823	-0.611902	0.0587845	0.0799904	0.252006	-0.0344243	0.256837	0.314304	0.210469	0.495823	0.461554	0.213879	0.416856	0.195239	0.00887527	-0.292461	0.304664	-0.460893	0.460893
XM_005185013	NO	black	0.259777	0.0508925	0.612491	0.755406	0.326505	0.0709063	0.569594	0.295989	0.239168	0.591014	0.885111	0.720049	-0.0798583	0.0324014	-0.149522	0.0281999	0.237759	-0.399287	-0.571383	-0.552888	-0.762429	-0.863179	-0.454517	-0.770805	-0.289133	-0.00369399	-0.196208	0.144497	-0.144497
XM_005185020	NO	black	0.317795	0.147742	0.697295	0.884192	0.249898	0.265589	0.57159	0.103141	0.0312241	0.352907	0.642309	0.345112	-0.0612914	0.0654231	-0.454956	0.132609	0.21754	-0.233072	-0.582627	-0.421805	-0.617474	-0.777405	-0.421921	-0.636063	-0.12583	0.0148853	-0.172049	-0.0361639	0.0361639
XM_020037299	NO	black	-0.371382	-0.335865	-0.504623	-0.521203	-0.0099457	0.0984844	-0.187516	-0.315643	-0.116522	-0.495162	-0.479417	-0.454272	0.250267	0.24	0.155971	0.270101	0.0493392	-0.112826	0.455386	0.409519	0.30683	0.473883	0.219031	0.480229	0.0459366	-0.136255	0.019341	0.0151671	-0.0151671
XM_005185046	NO	black	0.409897	0.273601	0.841985	0.542328	0.0085655	-0.0244698	0.500349	0.09129	0.0314837	0.671703	0.704738	0.478864	-0.0668475	0.114523	-0.121429	-0.181247	0.299243	-0.221586	-0.635617	-0.443454	-0.571368	-0.862483	-0.102955	-0.727841	-0.139767	0.0774143	0.124697	-0.0352043	0.0352043
XM_005185064	NO	black	0.025772	0.388345	-0.158259	-0.30046	-0.357706	-0.120176	-0.367289	-0.272592	-0.283669	-0.181943	-0.561499	-0.526917	0.0877952	0.0522226	-0.0871461	-0.209388	-0.173221	0.169439	-0.1668	0.494115	0.515546	0.38618	0.245402	0.350835	0.512529	0.0144498	0.0288222	-0.120563	0.120563
XM_005185076	NO	black	0.0196605	-0.17256	-0.107074	-0.103564	-0.0444238	-0.0608515	-0.242954	-0.191344	-0.0813313	-0.153707	-0.411337	-0.293789	0.411223	0.153172	0.0395015	0.171266	0.0171718	0.347845	0.250985	0.299769	0.366127	0.214109	-0.123542	0.0131337	-0.176873	-0.260866	0.12723	-0.180913	0.180913
XM_005185085	NO	black	0.243337	0.210667	0.0654524	0.0212874	-0.0025195	-0.186027	-0.0454122	0.200173	0.398988	0.265606	0.266481	0.398557	0.189064	0.192835	-0.143698	-0.119277	-0.123382	-0.0514553	-0.214696	-0.320615	-0.105087	-0.0754082	-0.288637	-0.161813	0.186719	0.222253	0.231969	0.37842	-0.37842
XM_020037348	NO	black	0.148025	0.135568	0.269743	0.361576	0.186648	0.0845508	0.438297	0.560922	0.503217	0.30286	0.733908	0.575221	0.0265013	-0.106459	-0.00177187	-0.226956	-0.183098	-0.345575	-0.269047	-0.312819	-0.626997	-0.489044	-0.230726	-0.306461	-0.100712	0.195948	0.0799694	0.395311	-0.395311
XM_005185234	NO	black	0.049336	-0.129871	-0.0937163	-0.367181	0.048254	0.0705147	-0.207035	-0.281997	-0.226666	-0.316046	-0.448457	-0.503659	0.0930331	0.159234	0.0820147	-0.0167653	-0.0820996	0.404684	0.431793	0.303666	0.343267	0.32549	0.297422	0.308789	0.00495933	-0.0180462	0.236496	-0.132317	0.132317
XM_005185210	NO	black	-0.107739	-0.283541	0.460907	0.688452	0.568475	0.389199	0.705033	0.29692	0.325509	0.206501	0.747992	0.50184	0.145008	0.0489757	-0.255596	0.253069	0.171421	-0.415714	-0.331919	-0.546763	-0.821368	-0.724893	-0.191263	-0.488678	-0.270352	0.0616104	-0.147092	0.0905734	-0.0905734
XM_005185227	NO	black	-0.153986	-0.254508	-0.245919	-0.0434286	0.0458432	0.202653	-0.0137048	-0.399331	-0.38194	-0.364268	-0.305045	-0.389751	-0.078541	0.0442389	-0.0743933	0.316348	0.202449	-0.210727	0.135494	0.25335	0.144236	0.199032	0.152725	0.246624	0.112196	-0.153256	-0.364345	-0.206578	0.206578
XR_002194734	NO	black	0.160265	-0.0239444	0.559219	0.580796	0.470171	0.419119	0.794726	0.507372	0.461311	0.221653	0.857066	0.464105	0.104158	-0.0194324	-0.384184	-0.0820599	-0.0429441	-0.47616	-0.426741	-0.554435	-0.904937	-0.756213	-0.100185	-0.389302	-0.0422746	0.325071	0.0688558	0.231982	-0.231982
XM_005185281	NO	black	0.388764	0.254592	0.819118	0.769991	0.0806168	0.096231	0.57675	0.0680007	0.0658184	0.571332	0.763334	0.506215	-0.0440156	0.141487	-0.263092	0.0338921	0.310425	-0.258569	-0.627219	-0.51867	-0.65018	-0.875844	-0.336204	-0.738702	-0.139827	0.0877266	0.0300871	0.00277745	-0.00277745
XM_020037409	NO	black	0.289142	-0.0122779	0.24867	0.310195	0.120662	0.0655044	0.355987	0.342615	0.369481	0.260073	0.56323	0.513997	0.111897	0.0112296	0.00809624	-0.0575031	-0.0240588	-0.366643	-0.203565	-0.459069	-0.479462	-0.411083	-0.289181	-0.328715	-0.105084	0.143904	-0.00351266	0.28209	-0.28209
XM_020037433	NO	black	-0.133479	0.0143026	-0.256278	-0.417085	-0.590234	-0.366988	-0.545632	-0.685908	-0.441323	-0.097807	-0.703543	-0.404017	0.136828	0.279543	0.326863	0.276211	0.321139	0.269082	0.404139	0.426144	0.738728	0.47181	0.0584237	0.162946	-0.105058	-0.292947	0.210819	-0.288474	0.288474
XM_020037444	NO	black	0.195347	-0.139025	0.353617	0.521777	0.475326	0.194593	0.529408	0.393899	0.100969	0.327306	0.763622	0.57163	-0.305535	-0.327278	-0.0220456	-0.0197526	0.154134	-0.270031	-0.232098	-0.496581	-0.707899	-0.621051	-0.069325	-0.47044	-0.334425	0.079528	-0.311747	0.0195831	-0.0195831
XM_005185424	NO	black	0.126704	-0.190849	0.314473	0.0352846	0.0359117	-0.0099462	0.471053	0.157921	0.229256	0.404508	0.647138	0.521567	0.0342163	0.191021	0.346324	-0.122786	0.266284	-0.397355	-0.185313	-0.367166	-0.573445	-0.561707	0.171373	-0.383799	-0.228532	0.0785452	0.0741559	0.244164	-0.244164
XM_005185480	NO	black	0.509258	0.399644	0.789026	0.461914	-0.116162	-0.101311	0.363478	0.0415428	-0.0400234	0.622405	0.547276	0.337756	-0.0730805	0.0430577	-0.0739832	-0.242571	0.227529	-0.187703	-0.532494	-0.318583	-0.404296	-0.729266	-0.182555	-0.6384	-0.122963	0.0578215	0.143629	0.00233554	-0.00233554
XM_011295049	NO	black	0.128984	0.124591	-0.190815	-0.55557	-0.450698	-0.0984753	-0.305107	-0.376589	-0.402402	-0.323708	-0.678034	-0.714423	0.10751	-0.0401167	0.240431	-0.127132	-0.0387354	0.325952	0.351392	0.463198	0.562691	0.442874	0.296501	0.424708	0.106062	-0.111812	0.263003	-0.310395	0.310395
XM_005185561	NO	black	0.0786227	-0.189568	0.189011	0.614568	0.428879	0.203962	0.478038	0.228933	0.118393	0.225711	0.693569	0.558609	-0.0346674	-0.123949	-0.0815696	0.279859	0.219676	-0.238231	-0.22864	-0.390497	-0.647726	-0.547618	-0.321706	-0.473929	-0.326348	-0.104977	-0.279274	0.0308601	-0.0308601
XM_005185569	NO	black	-0.286816	0.0413696	-0.619405	-0.673688	-0.417578	-0.435182	-0.838457	-0.424081	-0.283642	-0.229978	-0.898906	-0.498764	0.0876135	0.145872	0.213436	-0.0242361	-0.0524082	0.328639	0.405021	0.711782	0.934738	0.797092	0.188048	0.437749	0.121824	-0.295979	0.0713519	-0.112326	0.112326
XR_891601	NO	black	0.120839	-0.143138	0.534443	0.557362	0.314966	0.300294	0.797791	0.286861	0.362183	0.307933	0.881252	0.545885	0.100872	0.156873	-0.0565944	0.0883791	0.202034	-0.488033	-0.311671	-0.501039	-0.890832	-0.816884	-0.209744	-0.518479	-0.283458	0.114555	0.0765031	0.213987	-0.213987
XM_020037571	NO	black	-0.212202	-0.224401	-0.391048	-0.521439	-0.0182515	0.113915	-0.384527	-0.23435	-0.365477	-0.582944	-0.810554	-0.767318	-0.144003	-0.199946	0.0793811	-0.0408757	-0.234014	0.521195	0.485554	0.374908	0.588835	0.660199	0.509806	0.647029	0.169607	-0.0269563	-0.0850888	-0.286975	0.286975
XM_020037583	NO	black	-0.143014	-0.210217	-0.390655	-0.629127	-0.349959	-0.0217334	-0.408092	-0.481453	-0.405074	-0.489296	-0.811398	-0.757409	-0.0441536	0.142665	0.218813	-0.0079001	-0.0448475	0.513252	0.579769	0.484698	0.656426	0.627408	0.458643	0.574019	0.0901855	-0.119635	0.157793	-0.173551	0.173551
XM_005185844	NO	black	0.320648	0.306183	0.352556	0.590237	0.0829448	-0.230626	0.249003	0.303705	0.25586	0.705706	0.793075	0.79137	-0.0837686	0.0373073	-0.106293	-0.119277	0.141871	-0.337668	-0.673029	-0.299416	-0.523415	-0.661872	-0.594399	-0.731112	-0.127823	-0.114981	-0.176627	0.270574	-0.270574
XR_002194794	NO	black	0.269416	0.0878579	0.57511	0.466666	0.102169	0.0762979	0.655398	0.213626	0.130751	0.54262	0.857484	0.599723	-0.121446	0.0426642	0.0328546	-0.0922236	0.318491	-0.516485	-0.590092	-0.477225	-0.769277	-0.844942	-0.128407	-0.619316	-0.166809	0.0468333	-0.0731407	0.0324035	-0.0324035
XM_005185890	NO	black	0.388861	0.365635	0.711025	0.570264	0.0369151	-0.116755	0.427897	0.266572	0.247272	0.728417	0.795981	0.641603	0.0162159	0.13122	-0.16373	-0.227085	0.16855	-0.255244	-0.695904	-0.399457	-0.593305	-0.832576	-0.353663	-0.764822	-0.137999	0.0194338	0.157858	0.129017	-0.129017
XM_020037618	NO	black	-0.163261	-0.213565	-0.155491	-0.0359423	0.0706041	0.0619434	-0.302621	-0.286793	-0.246279	-0.33073	-0.560979	-0.428605	-0.0280786	-0.0100577	-0.186311	0.245525	-0.00588685	0.357581	0.477763	0.193484	0.44857	0.379414	0.0204527	0.208559	-0.151254	-0.113361	0.046297	-0.239577	0.239577
XR_891606	NO	black	0.126794	0.226503	0.132241	0.0292906	0.081013	0.132339	0.38674	0.504449	0.363771	0.106629	0.501747	0.277677	-0.0517591	-0.205459	0.00605775	-0.35615	-0.228093	-0.162305	-0.350941	-0.268927	-0.486386	-0.278287	0.164553	0.00649092	0.21023	0.309853	0.078471	0.245423	-0.245423
XM_005185917	NO	black	-0.0575654	-0.0146484	-0.52744	-0.737107	-0.412992	-0.25152	-0.681364	-0.402285	-0.466472	-0.403575	-0.935213	-0.715984	-0.0459305	-0.136559	0.315279	-0.0890134	-0.099221	0.471835	0.572218	0.600811	0.872792	0.793704	0.357935	0.57936	0.0910842	-0.196358	0.0688972	-0.291371	0.291371
XM_005185966	NO	black	0.37319	0.424803	0.561432	0.517831	-0.121309	-0.29202	0.202534	0.187018	0.199109	0.741913	0.661053	0.641576	-0.00445985	0.0785817	-0.0884573	-0.173271	0.196211	-0.205041	-0.544062	-0.271162	-0.382946	-0.666476	-0.476239	-0.743783	-0.215854	-0.0949268	0.180568	0.0871803	-0.0871803
XM_011295274	NO	black	0.0654852	0.150272	0.105763	-0.0134422	-0.322761	-0.094529	-0.158009	-0.446703	-0.31497	-0.0608607	-0.338302	-0.334725	0.0211147	0.225042	0.0939013	0.118778	0.161496	0.120127	0.0740411	0.312259	0.324199	0.0824566	-0.17163	0.000834403	-0.053665	-0.253348	0.171089	-0.163311	0.163311
XM_005186009	NO	black	-0.480422	-0.383104	-0.0916652	0.198132	0.365829	0.0694208	0.186162	-0.00522193	-0.0440032	0.0990715	0.326701	0.411959	-0.182279	-0.189646	0.0559992	0.428607	0.327348	-0.425055	0.095982	-0.262815	-0.327197	-0.172668	0.0380961	-0.159719	-0.289664	-0.0441315	-0.275167	-0.123105	0.123105
XM_020037663	NO	black	0.351498	0.179298	0.551855	0.714972	0.235595	0.0797085	0.574976	0.405302	0.419933	0.541654	0.92158	0.749284	0.13409	0.0658423	-0.264804	-0.00752476	0.145996	-0.535374	-0.651862	-0.533802	-0.769808	-0.81262	-0.496362	-0.70115	-0.113889	0.0907924	-0.0685017	0.254942	-0.254942
XR_002194818	NO	black	-0.0100163	0.206205	-0.254263	-0.509284	-0.241192	-0.144348	-0.496976	-0.23146	-0.291519	-0.278447	-0.746732	-0.686377	0.205414	-0.071729	-0.132504	-0.241541	-0.195071	0.380509	0.249985	0.591992	0.665367	0.523846	0.371496	0.414336	0.206511	-0.123981	0.323737	-0.279431	0.279431
XM_005186073	NO	black	-0.281056	-0.131246	-0.233057	-0.223982	0.0279965	0.0891896	-0.364464	-0.326965	-0.223151	-0.471501	-0.730628	-0.653133	0.133379	0.0740162	-0.163067	0.167285	-0.148274	0.405763	0.490737	0.378022	0.546591	0.513654	0.145438	0.412751	0.00340833	-0.110169	0.166623	-0.176163	0.176163
XM_005186107	NO	black	0.0718704	-0.114156	0.543091	0.686064	0.514215	0.224967	0.651375	0.518191	0.426216	0.448609	0.929611	0.735332	-0.0183079	-0.0939901	-0.241874	0.00750567	0.0563964	-0.397155	-0.45802	-0.636001	-0.871343	-0.803247	-0.293293	-0.610102	-0.242838	0.153612	-0.104708	0.191875	-0.191875
XM_011295336	NO	black	-0.27965	-0.114697	-0.46329	-0.583864	-0.247876	-0.101463	-0.58716	-0.387416	-0.3758	-0.490185	-0.881505	-0.652906	-0.0439624	-0.119226	0.139544	0.145263	-0.0762742	0.478374	0.67754	0.402296	0.779144	0.785088	0.351285	0.598651	0.0455602	-0.0359409	0.147571	-0.311272	0.311272
XM_005186158	NO	black	0.120748	0.0320945	0.377889	0.694428	0.327731	0.0521541	0.447794	0.456068	0.511107	0.473929	0.846579	0.788278	0.0379568	0.0782671	-0.180445	0.0246505	0.0177697	-0.422317	-0.447521	-0.471123	-0.698095	-0.663143	-0.536417	-0.61411	-0.208361	0.0608578	-0.133714	0.411821	-0.411821
XM_005186161	NO	black	0.232556	0.271531	0.375808	0.6234	-0.14539	-0.117222	0.280063	-0.131846	-0.148477	0.518459	0.582307	0.546534	-0.277126	0.083265	-0.00802982	0.185053	0.41174	-0.141463	-0.598576	-0.357151	-0.394385	-0.571087	-0.425175	-0.59597	-0.0634898	-0.103411	-0.264481	0.0151597	-0.0151597
XM_005186198	NO	black	0.395891	0.287462	0.690471	0.740366	0.023174	-0.0427896	0.490057	0.199137	0.140592	0.670323	0.816813	0.646302	-0.173655	0.0829639	-0.0961199	-0.113496	0.250872	-0.404425	-0.660985	-0.415221	-0.631897	-0.856049	-0.44138	-0.782859	-0.200776	-0.0148572	-0.140871	0.0746333	-0.0746333
XM_005186257	NO	black	0.343217	0.232322	0.314085	0.362807	-0.0666545	-0.0167804	0.269262	0.0664741	0.105817	0.343833	0.500431	0.354257	-0.312822	0.172207	-0.0968736	-0.187751	0.0712147	-0.248848	-0.494835	-0.361131	-0.384046	-0.422969	-0.286885	-0.314453	0.167925	0.126008	-0.269833	0.325341	-0.325341
XM_005186295	NO	black	-0.382123	-0.348996	-0.332098	-0.500707	0.108685	0.288762	-0.201744	-0.395444	-0.358555	-0.698033	-0.74478	-0.786913	0.145324	-0.0410514	-0.0806878	0.311797	-0.0489454	0.375393	0.540197	0.255496	0.447329	0.595908	0.50225	0.668332	0.188427	0.0651755	0.140479	-0.385658	0.385658
XM_005186338	NO	black	-0.0861637	0.00998751	-0.142126	-0.251286	-0.127958	-0.0500316	-0.356911	-0.356826	-0.324535	-0.279138	-0.530353	-0.391342	0.0914288	-0.0786392	0.0605536	0.258028	0.0278992	0.18622	0.354653	0.196533	0.475479	0.421864	0.0163934	0.287769	0.0390294	-0.0723001	0.147294	-0.29312	0.29312
XM_020037768	NO	black	0.0679247	0.182282	-0.480784	-0.673234	-0.471594	-0.309915	-0.729202	-0.344309	-0.305866	-0.313079	-0.873878	-0.625447	0.0281177	0.0284301	0.144314	-0.216288	-0.190845	0.334106	0.406777	0.597803	0.878777	0.770732	0.276992	0.530148	0.261189	-0.112593	0.134024	-0.10376	0.10376
XM_011295402	NO	black	0.0302836	0.115785	-0.431753	-0.480109	-0.112628	-0.19868	-0.488401	-0.154209	-0.353011	-0.258977	-0.5792	-0.482784	-0.189789	-0.223663	0.315767	-0.216233	-0.200777	0.396394	0.248613	0.558427	0.548843	0.521745	0.0877352	0.383389	0.0557454	-0.300683	-0.132753	-0.157262	0.157262
XM_020037777	NO	black	-0.347509	-0.227452	-0.0850618	0.000613874	0.16412	0.111167	-0.176914	-0.245575	-0.243595	-0.242484	-0.313041	-0.174004	-0.0444883	-0.0330419	0.0437125	0.398643	0.0356017	0.396037	0.294706	-0.0188506	0.229315	0.270843	0.0779261	0.178161	-0.0509461	0.0499928	-0.0727401	-0.206337	0.206337
XM_020037774	NO	black	-0.227468	-0.340551	0.259927	0.57799	0.636526	0.182226	0.491705	0.356734	0.42551	0.325326	0.761466	0.70884	0.179407	0.0521638	-0.20524	0.282999	0.21342	-0.470539	-0.236801	-0.46828	-0.72748	-0.619297	-0.269219	-0.552088	-0.394062	-0.0413118	-0.150083	0.214858	-0.214858
XM_005186378	NO	black	-0.340068	-0.114449	-0.670767	-0.53792	-0.298431	-0.404382	-0.847088	-0.430301	-0.458602	-0.227431	-0.85743	-0.42772	-0.0685068	-0.0975889	0.200507	0.157169	0.0538032	0.456442	0.480589	0.647484	0.906737	0.786272	0.144824	0.366951	-0.0316835	-0.384065	-0.132928	-0.319078	0.319078
XM_011295411	NO	black	-0.325449	-0.163897	-0.322693	-0.253023	-0.00879838	-0.0577914	-0.374625	-0.284797	-0.162588	-0.279551	-0.508462	-0.358834	0.242915	0.0483778	-0.242826	0.285775	0.0188729	0.320132	0.440946	0.348156	0.452199	0.426536	0.030802	0.245184	-0.079027	-0.225542	0.383724	-0.319268	0.319268
XM_005186386	NO	black	0.153993	-0.147106	0.571013	0.610251	0.319371	0.151488	0.651239	0.202334	0.120699	0.461121	0.817739	0.581685	0.0580058	-0.0297377	0.0542221	0.125884	0.366633	-0.533243	-0.325127	-0.367391	-0.766932	-0.854945	-0.209552	-0.694296	-0.4782	-0.123086	-0.0922926	-0.0124636	0.0124636
XM_011295418	NO	black	0.0293813	0.0789249	-0.0595469	-0.351583	-0.30558	-0.168943	-0.248649	-0.252262	-0.272493	-0.0461651	-0.320726	-0.301029	-0.0436078	0.0953998	0.392197	-0.162348	-0.0116895	0.228981	0.286621	0.452777	0.343807	0.208722	0.211855	0.153924	-0.0879062	-0.137827	0.200975	-0.0817929	0.0817929
XM_011295427	NO	black	0.201187	0.162937	0.451728	0.825192	0.158768	0.0355087	0.480811	0.14168	0.0869681	0.512758	0.820812	0.695347	-0.150366	-0.0300687	-0.139469	0.22849	0.34171	-0.332897	-0.583898	-0.479287	-0.663155	-0.744157	-0.552981	-0.706606	-0.230528	-0.095655	-0.288789	0.0357194	-0.0357194
XM_020037797	NO	black	0.0104135	-0.333483	0.150361	0.326296	0.190552	0.0453022	0.415416	-0.029497	0.0693886	0.300519	0.610946	0.530979	0.0834939	0.145837	0.0793433	0.374845	0.470471	-0.376782	-0.109898	-0.356661	-0.54182	-0.517496	-0.298692	-0.48886	-0.384514	-0.18504	-0.100147	-0.0454253	0.0454253
XR_225651	NO	black	0.0772014	-0.123722	0.341516	0.535212	0.286968	0.198838	0.640233	0.357526	0.363735	0.32155	0.86252	0.678934	-0.0350929	0.0265742	0.0849876	0.102306	0.158525	-0.556037	-0.367925	-0.517448	-0.808059	-0.670434	-0.298714	-0.462745	-0.193511	0.147	-0.274059	0.349607	-0.349607
XM_020037819	NO	black	0.342165	0.131382	0.507319	0.65486	0.439325	0.196037	0.527113	0.365211	0.317126	0.374765	0.765657	0.555792	0.0348684	0.0228075	-0.403972	-0.00268084	0.0592369	-0.236865	-0.572103	-0.568227	-0.689599	-0.67265	-0.365757	-0.544947	-0.0171132	0.200991	-0.112276	0.206425	-0.206425
XR_002194866	NO	black	-0.345087	-0.199753	-0.295766	-0.0334099	-0.0523447	-0.101155	-0.394564	-0.326514	-0.292645	-0.230731	-0.478327	-0.270033	-0.0800251	0.0144187	0.218772	0.355872	0.077526	0.377238	0.510805	0.39836	0.460728	0.381902	-0.235784	0.122794	-0.364612	-0.359367	-0.11413	-0.186524	0.186524
XM_005186469	NO	black	-0.270082	-0.255135	-0.526094	-0.847988	-0.158116	-0.261988	-0.419259	-0.176428	-0.192501	-0.199358	-0.523094	-0.307555	0.121166	-0.106618	0.473897	-0.0890622	0.0486451	0.239401	0.550477	0.42002	0.488251	0.531249	0.64073	0.408654	-0.113178	-0.163522	0.267628	-0.18145	0.18145
XR_002194871	NO	black	0.32632	0.079368	0.635496	0.508445	0.32736	0.293556	0.774838	0.497508	0.431224	0.375288	0.921149	0.556914	-0.0195278	0.00344179	-0.217172	-0.238108	-0.0174087	-0.467583	-0.538576	-0.622939	-0.903	-0.816956	-0.0861483	-0.458849	-0.00304006	0.336995	0.0647287	0.288307	-0.288307
XR_225654	NO	black	0.125262	-0.109083	0.570516	0.597761	0.453645	0.379572	0.816864	0.397424	0.446718	0.283836	0.929221	0.596512	0.0133116	0.109368	-0.183147	0.0174234	0.0783477	-0.48877	-0.43531	-0.707807	-0.955883	-0.798234	-0.144452	-0.44713	-0.0838868	0.321002	-0.0568369	0.351969	-0.351969
XM_005186489	NO	black	-0.123488	0.0754397	0.261258	0.0801554	0.261734	0.0974781	0.314762	0.378753	0.468988	0.198081	0.438958	0.31414	0.357629	0.0982655	-0.241129	-0.188313	-0.165257	-0.125493	-0.242714	-0.165285	-0.423168	-0.346202	0.125001	-0.161266	0.0439949	0.180385	0.544685	0.165672	-0.165672
XM_005186522	NO	black	0.0239691	-0.0079652	0.520783	0.797354	0.429826	0.283249	0.631937	0.394587	0.455506	0.312071	0.818948	0.629344	0.138571	0.0627862	-0.309612	0.149284	0.0547436	-0.353035	-0.427571	-0.549682	-0.786401	-0.727869	-0.378896	-0.55002	-0.198162	0.1317	0.00473558	0.190245	-0.190245
XR_002194876	NO	black	0.196305	0.301287	-0.0618317	0.327507	0.150073	0.101174	0.160339	0.605622	0.460201	0.0306108	0.439974	0.351378	-0.189484	-0.268151	-0.212024	-0.322135	-0.420589	-0.306198	-0.265203	-0.158607	-0.349112	-0.114219	-0.327976	-0.00196944	0.176616	0.183638	-0.223324	0.436526	-0.436526
XM_020037885	NO	black	0.177447	-0.0102136	0.554634	0.636345	0.408902	0.315628	0.746479	0.487899	0.469974	0.328078	0.926351	0.612165	0.124401	0.00833337	-0.22309	-0.028594	0.0299887	-0.535561	-0.477173	-0.544857	-0.905932	-0.799357	-0.24046	-0.50397	-0.120269	0.211448	-0.0153336	0.280713	-0.280713
XM_005186705	NO	black	-0.284144	-0.149917	-0.360972	-0.294845	-0.119293	-0.0727385	-0.403619	-0.259596	-0.260204	-0.336624	-0.664326	-0.464751	0.0673528	-0.0480552	0.129117	0.179416	0.00814696	0.330907	0.360766	0.388316	0.556854	0.492036	0.112366	0.299956	-0.101502	-0.262049	-0.0606788	-0.307994	0.307994
XM_005186736	NO	black	0.457766	0.248114	0.564859	0.712511	0.00647146	-0.0519964	0.399212	-0.0142694	-0.128969	0.581933	0.697211	0.53687	-0.380832	0.00698854	-0.0915787	0.0170683	0.382928	-0.283403	-0.544037	-0.405344	-0.51738	-0.735301	-0.440449	-0.712496	-0.21135	-0.0903086	-0.282614	-0.0206504	0.0206504
XM_005186716	NO	black	0.254559	-0.100522	0.37047	0.230121	0.0562674	0.160186	0.46565	0.16314	0.286231	0.174389	0.526236	0.36847	0.101644	0.166287	0.094	-0.0100398	0.137964	-0.283003	0.070245	-0.398947	-0.488121	-0.439841	0.0630617	-0.274815	-0.249384	0.237019	0.25918	0.286301	-0.286301
XM_005186753	NO	black	-0.270515	-0.207646	-0.457229	-0.533274	-0.262223	-0.169336	-0.545955	-0.665888	-0.517364	-0.316604	-0.761379	-0.516646	-0.167588	0.251904	0.175978	0.248983	0.177554	0.373174	0.401437	0.350812	0.6953	0.636425	0.288203	0.425634	0.158663	-0.13351	-0.12028	-0.190583	0.190583
XM_011295567	NO	black	0.183249	0.305249	0.160815	0.255692	-0.0134389	-0.0467964	0.236873	0.441661	0.599077	0.301047	0.538759	0.518523	0.227213	0.231904	-0.0677963	-0.294988	-0.233592	-0.472242	-0.409936	-0.143419	-0.395632	-0.335536	-0.282824	-0.253202	0.135844	0.17596	0.135745	0.562089	-0.562089
XM_020037940	NO	black	0.234557	0.0604344	0.432095	0.672194	0.298322	0.143973	0.586052	0.504164	0.532925	0.436678	0.951152	0.815352	-0.0355665	0.037083	-0.180561	-0.0133793	0.042605	-0.511142	-0.485894	-0.659706	-0.814734	-0.70837	-0.448366	-0.561804	-0.117745	0.231904	-0.147823	0.40852	-0.40852
XR_891636	NO	black	-0.0167954	-0.20672	0.365084	0.662704	0.548528	0.328585	0.603645	0.485112	0.308923	0.222066	0.769049	0.558956	-0.100492	-0.227643	-0.211008	0.0834236	0.0506561	-0.488449	-0.227611	-0.470691	-0.774753	-0.635488	-0.227434	-0.438786	-0.31976	0.112636	-0.289894	0.145123	-0.145123
XM_020037966	NO	black	-0.182135	0.0176701	-0.384246	-0.657757	-0.39053	-0.129302	-0.540145	-0.54356	-0.429463	-0.412572	-0.86824	-0.734685	-0.0905631	0.162947	0.129791	-0.0209386	-0.0513403	0.371279	0.372315	0.4441	0.754125	0.704196	0.399476	0.609841	0.345345	0.0201987	0.0501756	-0.145723	0.145723
XM_011295603	NO	black	0.186777	-0.124188	0.687924	0.619842	0.36006	0.321475	0.813371	0.262228	0.362361	0.380324	0.890541	0.542029	0.115237	0.253087	-0.195379	0.0428247	0.2329	-0.607308	-0.427785	-0.595481	-0.90637	-0.901058	-0.196778	-0.598905	-0.225395	0.174249	0.00866724	0.235353	-0.235353
XM_005186835	NO	black	-0.28741	-0.0246781	-0.657409	-0.607297	-0.227466	-0.27829	-0.805556	-0.253675	-0.3037	-0.38935	-0.911785	-0.548876	-0.0175731	-0.157618	0.135425	-0.00889757	-0.22712	0.542254	0.521926	0.620534	0.89648	0.87625	0.215052	0.559212	0.115424	-0.198366	0.0174701	-0.202237	0.202237
XM_020037993	NO	black	0.0945094	-0.113822	0.453086	0.492944	0.306263	0.113465	0.613849	0.281409	0.237914	0.469183	0.797322	0.568898	0.119045	0.0657798	-0.0455539	-0.016872	0.285016	-0.573104	-0.470776	-0.273063	-0.750367	-0.808289	-0.131645	-0.632552	-0.308454	-0.0955907	-0.111321	0.133584	-0.133584
XM_011295632	NO	black	-0.152722	0.0515325	-0.464349	-0.481152	-0.335075	-0.301533	-0.670448	-0.24998	-0.359507	-0.210314	-0.704084	-0.408727	-0.0957558	-0.213249	0.197223	-0.0664265	-0.0671499	0.47477	0.46943	0.493917	0.747365	0.655042	0.333744	0.37842	-0.015016	-0.18865	0.0517638	-0.267889	0.267889
XM_011295649	NO	black	0.460575	0.382776	0.610886	0.521616	-0.00323841	-0.0780729	0.379849	0.28599	0.256344	0.616918	0.724393	0.608642	-0.0397284	0.0431169	-0.258856	-0.241063	0.0834022	-0.194913	-0.575142	-0.500988	-0.52659	-0.676738	-0.24724	-0.603934	0.000276903	0.237871	0.170502	0.280198	-0.280198
XM_011295686	NO	black	-0.100628	-0.154671	-0.447324	-0.0939545	-0.158729	-0.0461116	-0.200596	-0.287782	-0.318145	-0.274515	-0.324477	-0.226457	-0.346525	-0.0562238	0.310857	0.266665	0.162005	0.113436	0.227462	0.192416	0.275517	0.337926	-0.178292	0.209916	-0.0956044	-0.25818	-0.551053	-0.0658591	0.0658591
XM_005187054	NO	black	-0.0797386	0.177622	-0.334802	-0.601086	-0.451059	-0.403449	-0.678869	-0.274965	-0.16721	-0.112097	-0.770241	-0.539939	0.238188	0.199105	0.141977	-0.264739	-0.158229	0.41421	0.290442	0.787107	0.807945	0.558656	0.148567	0.286106	0.0468023	-0.324315	0.364948	-0.0847253	0.0847253
XM_005187058	NO	black	0.149131	0.240475	-0.206344	-0.606099	-0.38846	-0.416965	-0.610828	-0.0977979	0.0299007	0.0224428	-0.610821	-0.391262	0.35001	0.250345	0.0155217	-0.460376	-0.234639	0.365414	0.15841	0.595504	0.695877	0.444081	0.231917	0.19069	0.145127	-0.150374	0.478615	0.0200982	-0.0200982
XM_005187071	NO	black	0.271362	0.0323716	0.257781	0.125201	0.238746	-0.0441414	0.346103	0.406261	0.272375	0.410407	0.61862	0.465895	-0.0685664	-0.138821	-0.00106069	-0.357175	0.0228534	-0.318369	-0.270098	-0.261144	-0.520966	-0.506371	0.090746	-0.374391	-0.17241	-0.000183629	0.0926923	0.106092	-0.106092
XM_011295723	NO	black	-0.187641	0.143924	-0.615908	-0.746286	-0.380822	-0.366512	-0.818945	-0.306727	-0.309374	-0.303156	-0.878565	-0.536356	-0.0893603	-0.0958877	0.147082	-0.137222	-0.207349	0.528375	0.410136	0.52221	0.901464	0.876638	0.322212	0.601782	0.299503	-0.0652662	0.113489	-0.144793	0.144793
XM_020038072	NO	black	0.360766	0.284064	0.029624	0.123891	-0.147345	-0.059568	0.139386	0.381489	0.257642	0.207263	0.383093	0.311462	-0.126763	-0.0626451	0.161277	-0.439007	-0.203044	-0.483148	-0.376681	0.0252172	-0.257577	-0.203982	-0.11444	-0.108588	0.18891	0.116173	-0.345774	0.482064	-0.482064
XM_005187215	NO	black	-0.137017	-0.237044	-0.231735	-0.581948	-0.0311046	-0.0267301	-0.309996	-0.204476	-0.305509	-0.288676	-0.614112	-0.64977	0.103264	-0.0180259	0.0944149	-0.238215	-0.105937	0.349656	0.428386	0.638305	0.472995	0.377835	0.595862	0.359688	-0.0496452	-0.227106	0.2276	-0.298406	0.298406
XM_005187261	NO	black	-0.156735	0.13883	-0.451802	-0.393811	-0.429475	-0.118751	-0.540631	-0.307307	-0.167338	-0.457395	-0.794084	-0.590275	0.156384	0.113683	0.116751	0.0659386	-0.242908	0.328571	0.358133	0.587455	0.733852	0.70647	-0.0175142	0.530542	0.243281	-0.0921793	0.12277	-0.0430557	0.0430557
XM_005187310	NO	black	0.183301	0.0067466	0.565243	0.667629	0.372542	0.183802	0.664323	0.444043	0.372692	0.47668	0.94779	0.718034	0.00704973	-0.0478629	-0.134907	-0.0235234	0.140201	-0.531918	-0.526316	-0.551825	-0.861299	-0.833837	-0.26025	-0.626676	-0.205063	0.126584	-0.138264	0.208204	-0.208204
XM_005187315	NO	black	0.363514	0.23187	0.805419	0.668768	0.104507	0.0264833	0.441874	0.0644066	-0.0430673	0.620172	0.633401	0.420408	-0.149382	0.078312	-0.296855	-0.0997958	0.269685	-0.155942	-0.687356	-0.429418	-0.521804	-0.814627	-0.199657	-0.721799	-0.0792147	0.0559409	-0.0828321	-0.0884197	0.0884197
NM_001286879	NO	black	0.381795	0.208119	0.807126	0.693928	0.0602796	0.0892389	0.646004	0.163023	0.150095	0.58096	0.83159	0.549098	-0.0239033	0.126389	-0.0828025	-0.0378314	0.276784	-0.34091	-0.566458	-0.484949	-0.721755	-0.918976	-0.337807	-0.74103	-0.245782	0.0449632	0.0842343	0.0177178	-0.0177178
XM_005187340	NO	black	-0.429405	-0.382317	-0.170447	-0.124608	0.0373724	0.125334	-0.198668	-0.493649	-0.55477	-0.374469	-0.577708	-0.530477	-0.0796179	-0.0743338	0.0844944	0.454205	0.264898	0.407063	0.525844	0.295242	0.400678	0.320013	0.24959	0.221684	-0.309996	-0.274925	-0.0584357	-0.60142	0.60142
XM_020038152	NO	black	0.324773	0.225271	0.468822	0.610425	0.0505584	-0.175344	0.365215	0.316147	0.260907	0.728679	0.84417	0.764325	-0.0764865	0.0611378	-0.0527244	-0.16489	0.21451	-0.467152	-0.607252	-0.29238	-0.599916	-0.774104	-0.455085	-0.783735	-0.250479	-0.0951421	-0.185439	0.238711	-0.238711
XM_005187394	NO	black	0.320111	0.263568	0.716749	0.684944	0.0719586	-0.0134101	0.50933	0.330095	0.261683	0.639552	0.824723	0.637505	-0.0638529	0.0129298	-0.10078	-0.146703	0.139349	-0.346661	-0.628277	-0.419117	-0.659221	-0.845145	-0.408085	-0.73483	-0.20506	0.0261833	-0.00729972	0.0957662	-0.0957662
XM_020038154	NO	black	-0.130761	-0.401168	0.0867815	0.234712	0.329171	0.0659564	0.402438	0.269394	0.513764	0.235642	0.603689	0.613543	0.444924	0.2569	0.0883616	0.22519	0.227332	-0.409725	0.0929707	-0.287869	-0.549299	-0.450625	-0.160805	-0.43033	-0.513557	-0.108658	0.23368	0.255049	-0.255049
XM_005187399	NO	black	0.181981	0.0379577	0.2392	0.54694	0.436699	0.196518	0.498301	0.599127	0.474867	0.245244	0.748193	0.610204	0.0398121	-0.241697	-0.244969	-0.0256997	-0.077422	-0.395465	-0.473982	-0.558203	-0.701272	-0.528003	-0.375834	-0.38418	-0.0531482	0.140381	-0.242276	0.200516	-0.200516
XM_020038153	NO	black	-0.31891	-0.203844	-0.191336	0.308336	0.324057	0.0449333	0.203438	0.161749	0.0963619	0.111779	0.50565	0.599891	-0.2217	-0.234672	0.148834	0.442038	0.226151	-0.283044	-0.159503	-0.398204	-0.430931	-0.171599	-0.334769	-0.177994	-0.141368	-0.0275942	-0.496324	0.0874646	-0.0874646
XM_005187407	NO	black	-0.356488	-0.153273	-0.545243	-0.639717	-0.254292	-0.214017	-0.653443	-0.372597	-0.277903	-0.360231	-0.873049	-0.576739	0.0239876	0.102947	0.158828	-0.0160916	-0.10129	0.356206	0.483352	0.556776	0.792544	0.746237	0.399878	0.526698	0.127105	-0.138469	0.0116368	-0.0412804	0.0412804
XM_011295843	NO	black	0.355267	0.286018	0.694285	0.534056	0.0440354	-0.0486549	0.495901	0.232839	0.271663	0.662951	0.796551	0.613638	0.218792	0.17115	-0.189259	-0.157455	0.216983	-0.394564	-0.654204	-0.377753	-0.633985	-0.848109	-0.239117	-0.733145	-0.131242	0.00510344	0.265177	0.108481	-0.108481
XM_020038175	NO	black	0.046447	0.0863039	-0.128164	-0.440502	-0.315994	0.0833862	-0.294223	-0.264383	-0.3578	-0.477463	-0.723848	-0.789796	-0.0415594	-0.0531972	0.192158	-0.157988	-0.266125	0.504099	0.360255	0.441082	0.561996	0.511118	0.297858	0.546587	0.204246	0.035484	0.117632	-0.254609	0.254609
XM_020038181	NO	black	-0.326745	-0.311319	-0.336406	-0.306085	-0.0661283	0.0858991	-0.306999	-0.641794	-0.557346	-0.47482	-0.693755	-0.637477	0.0106031	0.0780509	0.0710363	0.436254	0.234785	0.169183	0.449131	0.343389	0.506667	0.488593	0.235081	0.406779	0.0213836	-0.210986	-0.18318	-0.399617	0.399617
XM_005187463	NO	black	-0.132399	-0.489283	0.0874817	0.125425	0.430085	0.151701	0.310695	0.114284	-0.0235837	0.10349	0.391879	0.348699	-0.398601	-0.159926	0.233453	0.146302	0.255638	-0.0746425	0.236713	-0.420121	-0.415225	-0.272609	0.214316	-0.193677	-0.449409	0.0540758	-0.275905	0.00127212	-0.00127212
XM_005187486	NO	black	0.166086	0.326752	0.308557	0.389193	0.162834	0.0580679	0.160573	0.270559	0.525375	0.225821	0.375399	0.348993	0.168615	0.317529	-0.60971	-0.142051	-0.197507	-0.18705	-0.397219	-0.406879	-0.284974	-0.252706	-0.247563	-0.208693	0.313637	0.430235	0.19704	0.532085	-0.532085
XM_005187523	NO	black	0.217067	0.133617	0.523532	0.648153	0.134698	-0.0797089	0.394262	0.181951	0.0511692	0.660014	0.800487	0.754186	-0.316247	-0.0745292	-0.0914704	0.0340799	0.333664	-0.23803	-0.583011	-0.567851	-0.598747	-0.736974	-0.325749	-0.725401	-0.216187	0.00499396	-0.222703	0.0226148	-0.0226148
NM_001309052	NO	black	0.335064	0.348152	0.688699	0.656882	-0.0441347	-0.00472534	0.369517	0.141468	-0.0328728	0.513253	0.57586	0.393908	-0.209467	-0.160709	-0.153388	-0.0701537	0.148475	-0.0474218	-0.556256	-0.367248	-0.438621	-0.66413	-0.303563	-0.582843	-0.0905494	0.0581349	-0.0320494	-0.15779	0.15779
XM_005187600	NO	black	0.447729	0.334761	0.139061	-0.0290543	0.0898951	-0.117177	0.142664	0.491371	0.422369	0.276412	0.404877	0.306439	0.253333	-0.0876813	-0.0056272	-0.444944	-0.214741	-0.185226	-0.354754	-0.0772781	-0.279681	-0.258119	-0.0982912	-0.203246	0.0828715	0.0693221	0.199243	0.214816	-0.214816
XM_020038233	NO	black	0.294748	0.147546	0.00203914	0.00503357	0.0684195	0.100548	0.159002	0.493901	0.270106	0.0155958	0.294406	0.178461	-0.360535	-0.251789	-0.0012488	-0.52043	-0.357306	-0.0767775	-0.177966	-0.195659	-0.257567	-0.0688418	0.208098	0.110083	0.225262	0.288234	-0.186324	0.360154	-0.360154
XM_005187630	NO	black	-0.23964	-0.273344	-0.0440832	0.210511	-0.0581919	-0.160173	0.197542	-0.22322	0.0418538	0.312587	0.424498	0.53582	-0.0196822	0.277513	0.237138	0.448982	0.511691	-0.172981	0.0366888	-0.249148	-0.307269	-0.313665	-0.250867	-0.398424	-0.412613	-0.254808	0.0524634	0.0624102	-0.0624102
XM_011295913	NO	black	0.195089	0.162939	0.238988	-0.164621	0.0794998	0.0495355	-0.122085	0.166297	0.109873	-0.0377792	-0.296141	-0.405074	0.335101	0.121006	-0.333954	-0.509758	-0.34165	0.19396	-0.0505936	0.342424	0.221875	0.0324081	0.310777	0.060977	0.127672	0.0560867	0.352134	-0.0108257	0.0108257
XM_011295915	NO	black	0.41591	0.320258	0.608482	0.660721	0.0624771	-0.0188282	0.471765	0.351715	0.383086	0.572806	0.777297	0.618324	0.22307	0.151542	-0.193926	-0.0973703	0.106323	-0.452011	-0.646103	-0.309119	-0.605737	-0.782447	-0.597413	-0.730006	-0.165538	-0.0223255	0.0780012	0.189561	-0.189561
XM_011295929	NO	black	0.0499156	-0.245921	0.485082	0.48623	0.47421	0.464434	0.812422	0.46684	0.468856	0.113353	0.809034	0.442606	0.132669	0.00402608	-0.199813	0.0438383	0.00552746	-0.472839	-0.206464	-0.547503	-0.893337	-0.691038	-0.0494927	-0.319355	-0.177167	0.290398	0.0797605	0.242315	-0.242315
XR_002194981	NO	black	0.0700573	-0.203464	0.513464	0.581339	0.498377	0.354026	0.777821	0.432465	0.377771	0.305812	0.910195	0.599059	0.0266878	0.000716508	-0.161559	0.0322941	0.104337	-0.494269	-0.415771	-0.58699	-0.931099	-0.800249	-0.146342	-0.490924	-0.182352	0.190379	-0.124015	0.210726	-0.210726
XR_002194986	NO	black	0.124623	0.216932	0.412791	0.648992	0.3313	0.115993	0.469543	0.631939	0.520977	0.448781	0.829898	0.687302	-0.098879	-0.107579	-0.362992	-0.23898	-0.171052	-0.437403	-0.708457	-0.46922	-0.715413	-0.64045	-0.32502	-0.474597	0.107195	0.250521	-0.239687	0.386237	-0.386237
NM_001286889	NO	black	-0.258324	-0.0294893	-0.521953	-0.675665	-0.342735	-0.142044	-0.614758	-0.360246	-0.185071	-0.483351	-0.910215	-0.689279	0.0454275	0.184753	0.0878203	-0.0546129	-0.236154	0.452691	0.495647	0.502898	0.80241	0.810409	0.303777	0.656389	0.270983	-0.0258169	0.192796	-0.0280452	0.0280452
XM_005187783	NO	black	0.0877272	-0.0317711	0.32507	0.493096	0.289651	-0.0578331	0.394017	0.36393	0.399317	0.562479	0.834846	0.817521	-0.113372	0.0848651	-0.0563809	-0.0469397	0.137059	-0.451657	-0.368017	-0.504819	-0.661818	-0.642257	-0.383435	-0.605803	-0.264556	0.0519793	-0.124494	0.401245	-0.401245
XM_020038292	NO	black	0.0344678	-0.185391	0.391705	0.557261	0.446522	0.234445	0.618506	0.404416	0.28001	0.336334	0.827567	0.614216	0.013284	-0.125154	-0.0926497	0.0889781	0.116266	-0.490963	-0.410255	-0.461234	-0.800814	-0.705233	-0.264846	-0.502642	-0.208687	0.0486432	-0.223956	0.036445	-0.036445
XM_020038308	NO	black	-0.00292165	-0.096632	-0.147802	-0.58283	-0.391536	-0.0441289	-0.258708	-0.471029	-0.374248	-0.338072	-0.667247	-0.713134	0.337637	0.135674	0.206124	-0.0045067	0.0487332	0.381558	0.457141	0.544746	0.533015	0.391209	0.47741	0.385383	0.0342854	-0.166591	0.498541	-0.353527	0.353527
XM_020038309	NO	black	0.278907	-0.0936302	0.661622	0.623337	0.393834	0.295958	0.706201	0.307347	0.14307	0.354085	0.816274	0.504697	-0.0249206	-0.144336	-0.136529	0.0713247	0.209663	-0.366094	-0.324297	-0.580504	-0.805388	-0.815816	-0.173812	-0.578961	-0.324508	0.0967958	-0.0191925	-0.0679327	0.0679327
XR_002195000	NO	black	0.0848653	0.0802954	0.204364	0.204487	-0.0414751	-0.0499947	0.338502	0.308934	0.640273	0.366292	0.591524	0.532135	0.276508	0.483321	-0.161478	-0.192042	0.0195678	-0.527518	-0.384545	-0.238639	-0.47016	-0.451556	-0.214636	-0.358953	0.0320715	0.13292	0.204511	0.533509	-0.533509
XM_005187949	NO	black	-0.00365315	0.0175227	-0.173677	-0.332859	-0.136433	-0.0070682	-0.415839	-0.352992	-0.301209	-0.306873	-0.683997	-0.625643	-0.00638303	0.199887	-0.206748	-0.130694	-0.119167	0.385998	0.139843	0.372681	0.579195	0.46095	0.377369	0.371983	0.320066	-0.0239222	-0.0121862	-0.0962295	0.0962295
XM_020038345	NO	black	0.19808	0.374937	0.233177	0.334359	-0.0256631	-0.06154	0.265407	0.470036	0.622634	0.361585	0.632661	0.58377	0.287205	0.17562	-0.113891	-0.228266	-0.222748	-0.438959	-0.521745	-0.22722	-0.466665	-0.410904	-0.459722	-0.322572	0.156555	0.140037	0.17965	0.492101	-0.492101
XM_005187957	NO	black	0.131514	-0.186306	0.3106	0.454552	0.463335	0.224362	0.625405	0.433834	0.325276	0.300222	0.852296	0.627401	-0.143344	-0.111945	0.0209751	-0.0192094	0.116591	-0.536586	-0.285924	-0.54756	-0.824374	-0.654531	-0.180318	-0.430479	-0.251863	0.116816	-0.299686	0.232387	-0.232387
XR_891668	NO	black	0.235278	0.236835	0.546044	0.605126	0.0830255	-0.10852	0.459187	0.37539	0.333252	0.713993	0.892316	0.764324	-0.0209448	0.06724	-0.103704	-0.182316	0.174751	-0.47095	-0.637675	-0.315322	-0.676898	-0.826567	-0.363765	-0.760136	-0.217986	-0.0177032	-0.0209203	0.212801	-0.212801
XM_011296073	NO	black	-0.203156	-0.275883	-0.288536	-0.477289	-0.0184333	-0.0355603	-0.137144	-0.171616	0.0257483	-0.20755	-0.295628	-0.180107	0.599623	0.178071	0.195112	0.166875	0.151577	-0.125191	0.330918	0.240561	0.211031	0.243521	0.370441	0.191896	-0.106275	-0.173437	0.330879	-0.0701472	0.0701472
XM_005188031	NO	black	0.193044	0.0428435	0.0901723	-0.0610069	0.0823191	-0.0864032	0.167199	-0.0418761	0.0105046	0.186288	0.255308	0.188787	0.0147117	0.0188445	0.104868	0.0171744	0.252495	-0.0437278	-0.0769984	-0.260384	-0.216662	-0.217236	0.0268108	-0.185039	-0.136497	-0.0570185	0.157245	-0.0037226	0.0037226
XM_005188083	NO	black	-0.317623	-0.150152	-0.23148	0.138937	-0.138205	0.0383835	-0.242354	-0.377472	-0.140223	-0.323892	-0.442403	-0.276572	0.22095	0.220597	-0.00601794	0.566	0.110695	0.301309	0.338324	0.231316	0.371757	0.32175	-0.329541	0.115123	-0.18017	-0.266345	-0.0178992	-0.146432	0.146432
XM_020038414	NO	black	0.0872552	0.311687	-0.407896	-0.668334	-0.695769	-0.51015	-0.66126	-0.302269	-0.28436	-0.0269842	-0.63464	-0.308895	-0.123462	0.00523997	0.470918	-0.247902	-0.0729519	0.31985	0.164705	0.421885	0.74907	0.596175	0.0946572	0.341456	0.217998	-0.141784	0.101425	-0.035312	0.035312
XM_005188135	NO	black	-0.28944	-0.137962	0.172534	0.104582	0.274041	0.147532	0.227146	0.251008	0.553092	0.0751508	0.287937	0.333488	0.480989	0.274637	-0.359482	0.11715	-0.0376154	-0.118626	-0.0119185	-0.412545	-0.304345	-0.175913	0.185458	-0.0969985	0.0133448	0.363955	0.474017	0.304379	-0.304379
XM_005188134	NO	black	0.272912	0.394492	-0.0096702	-0.353042	-0.361714	-0.0384882	-0.179482	-0.0968004	-0.137574	-0.17062	-0.415723	-0.456343	0.146709	0.0472166	0.0431414	-0.36449	-0.27253	0.0431074	-0.20579	0.312915	0.34788	0.255442	0.214691	0.327896	0.506592	0.113106	0.144944	-0.0136721	0.0136721
XR_891676	NO	black	0.29005	0.420413	0.12259	0.289067	-0.129226	-0.108305	0.252962	0.233377	0.0888942	0.299024	0.481553	0.381985	-0.041011	-0.260595	0.0996844	-0.0517985	0.0934978	-0.360155	-0.608813	-0.180835	-0.360097	-0.367834	-0.4484	-0.302526	0.0820104	-0.134082	-0.195283	-0.0817749	0.0817749
XR_002195040	NO	black	0.112015	-0.0906754	0.453467	0.568258	0.302273	0.24288	0.679518	0.462052	0.419367	0.344035	0.884834	0.691221	-0.0644594	-0.0698364	-0.107232	0.0150311	0.0947491	-0.50105	-0.347863	-0.672183	-0.836712	-0.707432	-0.188877	-0.469762	-0.188536	0.257276	-0.0788009	0.227992	-0.227992
XM_005188331	NO	black	0.550262	0.434742	0.744414	0.570946	0.0178277	-0.0317955	0.434788	0.205415	0.049186	0.577868	0.629321	0.369226	-0.0123739	-0.0471664	-0.0945734	-0.255088	0.150385	-0.279916	-0.698196	-0.261487	-0.505186	-0.783119	-0.32762	-0.671428	-0.104471	-0.0479163	-0.0213903	-0.0623524	0.0623524
XM_005188354	NO	black	-0.200607	0.0489452	-0.414598	-0.492779	-0.254171	-0.221703	-0.624727	-0.249605	-0.242994	-0.27089	-0.775637	-0.489262	-0.00475805	-0.00411843	0.100338	-0.108621	-0.174393	0.357461	0.282155	0.45107	0.732399	0.646967	0.266132	0.428152	0.176101	-0.138554	0.00373521	-0.13045	0.13045
XM_005188415	NO	black	0.428685	0.299062	0.529959	0.710195	0.232483	-0.0169096	0.431286	0.496631	0.212425	0.587299	0.830994	0.652671	-0.222286	-0.298313	-0.160429	-0.225423	0.0251359	-0.27841	-0.584628	-0.378575	-0.648057	-0.747652	-0.456123	-0.682591	-0.227358	-0.0113484	-0.217428	0.101574	-0.101574
XM_005188450	NO	black	-0.296002	-0.117433	-0.555452	-0.34933	-0.112997	-0.326111	-0.748677	-0.269779	-0.417811	-0.162874	-0.719551	-0.331152	-0.258828	-0.236287	0.0718383	0.0570133	-0.0209413	0.351535	0.384034	0.497287	0.758714	0.658166	0.122587	0.284428	-0.0461949	-0.305669	-0.322344	-0.264732	0.264732
XM_020038550	NO	black	-0.0162904	0.0680893	-0.230964	-0.516515	-0.382798	-0.139766	-0.412646	-0.631872	-0.667643	-0.270435	-0.759382	-0.75414	0.0155424	0.0573501	0.0949145	0.0334103	0.159044	0.419807	0.295193	0.596002	0.656388	0.451379	0.397759	0.352465	0.108851	-0.258047	0.195059	-0.476975	0.476975
XM_005188513	NO	black	-0.0791019	0.0134492	-0.176913	-0.495388	-0.226818	-0.115488	-0.419519	-0.190575	-0.178015	-0.245639	-0.670675	-0.644895	0.156167	0.129002	0.069835	-0.310293	-0.259426	0.438962	0.324364	0.66645	0.581605	0.427442	0.351375	0.354476	0.0693444	-0.178653	0.302804	-0.106408	0.106408
XM_020038561	NO	black	0.144153	0.0629925	0.337782	0.718887	0.278745	-0.00285148	0.389001	0.375918	0.145143	0.4889	0.788769	0.726595	-0.192576	-0.339442	-0.0392671	0.0954967	0.193466	-0.355407	-0.347755	-0.380756	-0.620315	-0.646239	-0.462273	-0.643947	-0.411427	-0.118533	-0.289046	0.0289462	-0.0289462
XM_020038563	NO	black	0.338202	0.418314	0.339893	0.209914	-0.153117	-0.000328199	0.396609	0.234381	0.235363	0.347782	0.576409	0.348491	-0.0235471	0.113307	-0.0127049	-0.305856	0.021349	-0.330947	-0.693632	-0.261817	-0.4772	-0.485773	-0.0549859	-0.265784	0.292868	0.187389	-0.0386844	0.260983	-0.260983
XM_011296304	NO	black	-0.257455	-0.292631	-0.464218	-0.496538	-0.176323	0.0171251	-0.246432	-0.614992	-0.463362	-0.398948	-0.558415	-0.480297	-0.121112	0.248107	0.228236	0.248957	0.234648	0.183865	0.311726	0.237268	0.410251	0.482566	0.442244	0.464901	0.211117	-0.0719348	-0.195675	-0.0806656	0.0806656
XM_020038610	NO	black	0.25774	0.131573	0.147389	0.518225	0.128106	-0.00354815	0.233906	0.33264	0.277777	0.300403	0.632128	0.58457	-0.201866	-0.139601	-0.147116	0.0325674	-0.0137319	-0.190987	-0.28333	-0.426266	-0.458101	-0.358301	-0.52226	-0.357932	-0.0550073	0.0923513	-0.246552	0.246092	-0.246092
XM_011296356	NO	black	0.37855	0.258444	0.0162125	0.366172	0.0616283	-0.0613599	0.205224	0.379955	0.0651109	0.288022	0.578439	0.550214	-0.504884	-0.457699	0.132394	-0.172103	-0.0418043	-0.332267	-0.395858	-0.366873	-0.415337	-0.282261	-0.347643	-0.236894	0.0528886	0.0926491	-0.557293	0.21939	-0.21939
XM_011296354	NO	black	0.180401	0.0670047	0.271902	0.344077	0.139483	0.130463	0.521266	0.183181	0.361721	0.287035	0.707707	0.53878	0.00296063	0.31793	-0.0556589	-0.0484245	0.153849	-0.604066	-0.434502	-0.434642	-0.647764	-0.542112	-0.117793	-0.334696	0.0680848	0.216104	-0.0990694	0.488497	-0.488497
XM_020038650	NO	black	-0.0991181	0.0139258	-0.399499	-0.674218	-0.288465	-0.140616	-0.574564	-0.305912	-0.193483	-0.425966	-0.870078	-0.691148	0.184646	0.109053	0.0711247	-0.116489	-0.263727	0.550902	0.425056	0.475713	0.766474	0.726867	0.301883	0.584405	0.273363	-0.0250088	0.315611	-0.103817	0.103817
XR_002195102	NO	black	-0.464129	-0.434133	-0.588112	-0.384364	0.259677	0.278829	-0.253489	-0.150214	0.00414715	-0.724911	-0.597852	-0.471746	0.00788691	0.071047	-0.0209555	0.263517	-0.232647	0.245706	0.626663	0.11069	0.357891	0.696256	0.349712	0.700839	0.157912	0.163711	-0.134394	0.180692	-0.180692
XM_020038690	NO	black	-0.262524	-0.141522	-0.471644	-0.698105	-0.284673	-0.10526	-0.386088	-0.37437	-0.209011	-0.405881	-0.656859	-0.529036	0.244558	0.162195	0.267726	0.119533	0.0687627	-0.0698949	0.530988	0.528899	0.556505	0.580829	0.333027	0.492082	0.0168069	-0.166712	0.235342	-0.169536	0.169536
XM_005188946	NO	black	-0.268141	-0.125965	-0.0190264	-0.016193	0.0848349	0.143	-0.0862678	-0.235622	-0.0544082	-0.260526	-0.313215	-0.246846	0.0596937	0.247434	-0.0934087	0.232024	-0.0891573	0.129412	0.135832	0.0526816	0.187599	0.205019	-0.0788079	0.202109	0.120591	0.0549879	0.0868775	0.0202552	-0.0202552
XR_002195132	NO	black	-0.00285138	-0.264215	0.199235	0.210619	0.138742	0.0389827	0.431051	0.0465166	0.247051	0.25742	0.574319	0.522918	0.0916331	0.242041	0.308436	0.249114	0.363612	-0.261221	0.0369113	-0.419335	-0.520506	-0.454265	-0.110628	-0.386508	-0.419738	0.0186488	0.0489917	0.254563	-0.254563
XM_020038741	NO	black	-0.0256796	0.0642622	-0.402225	-0.513684	-0.290856	-0.105359	-0.5503	-0.36385	-0.223755	-0.44031	-0.787239	-0.626196	0.116497	0.113103	-0.0640013	0.0433273	-0.156729	0.462641	0.462881	0.395809	0.727943	0.714147	0.166595	0.536984	0.252843	0.0193901	0.252507	-0.151586	0.151586
XM_005188991	NO	black	-0.333972	-0.137984	-0.433511	-0.0459252	-0.0474853	-0.0970959	-0.507395	-0.394619	-0.291864	-0.308166	-0.597334	-0.311166	0.0545488	0.0103907	-0.0891501	0.485701	0.0515642	0.412154	0.309599	0.262103	0.562099	0.540437	-0.194773	0.238711	0.0119878	-0.23827	-0.205837	-0.205974	0.205974
XM_005189012	NO	black	0.389657	0.308319	0.744084	0.736406	0.139589	0.0764111	0.577019	0.409645	0.297761	0.572035	0.84678	0.607264	0.00728909	-0.0816988	-0.175733	-0.160774	0.0697567	-0.37719	-0.606205	-0.473649	-0.715037	-0.854574	-0.401532	-0.69633	-0.184756	0.107269	0.0283984	0.10207	-0.10207
XM_020038754	NO	black	-0.0860544	-0.282403	0.465052	0.548091	0.510247	0.181905	0.613858	0.277315	0.255373	0.44295	0.802066	0.611215	0.0832692	0.0890616	-0.147407	0.102225	0.287097	-0.500407	-0.351941	-0.367995	-0.782104	-0.801378	-0.111449	-0.642462	-0.397078	-0.0644531	-0.0878204	0.0929741	-0.0929741
XM_020038755	NO	black	0.297023	0.297749	0.409302	0.22961	0.0294552	-0.110224	0.222867	0.405571	0.536734	0.439487	0.502064	0.475678	0.271295	0.22051	-0.109705	-0.316497	-0.162101	-0.0329089	-0.379115	-0.321655	-0.355607	-0.432102	-0.268425	-0.403667	-0.0140539	0.196515	0.379014	0.420991	-0.420991
XM_005189081	NO	black	0.180806	0.0581549	0.385615	0.60821	0.285768	-0.0665971	0.427187	0.449272	0.466588	0.581299	0.847494	0.803388	0.235049	0.0243294	-0.0525738	-0.0136714	0.172322	-0.472096	-0.422811	-0.336184	-0.665869	-0.739652	-0.46488	-0.749963	-0.430553	-0.159936	0.0069457	0.222064	-0.222064
XM_005189083	NO	black	0.0866025	0.168029	-0.196216	-0.488259	-0.210143	0.0531693	-0.416059	-0.32403	-0.346152	-0.497645	-0.804101	-0.815684	0.16997	-0.0193947	-0.113453	-0.102712	-0.262417	0.361482	0.332763	0.484015	0.651264	0.603099	0.325148	0.580873	0.360482	0.0615024	0.271216	-0.208487	0.208487
XM_020038805	NO	black	-0.0747921	0.2306	-0.338551	-0.381128	-0.411312	-0.3385	-0.671673	-0.336476	-0.330907	-0.152767	-0.744711	-0.467197	0.149454	-0.0174087	0.0962301	-0.00643989	-0.09068	0.275325	0.265586	0.630522	0.783502	0.576793	-0.0214172	0.271622	0.0813154	-0.267314	0.135434	-0.280834	0.280834
XM_011296558	NO	black	-0.291643	0.0338882	-0.669521	-0.645755	-0.469064	-0.34373	-0.693807	-0.349183	-0.174118	-0.319384	-0.804983	-0.496671	0.0883519	0.158488	0.273009	-0.0397423	-0.143231	0.410111	0.403925	0.67905	0.807195	0.775003	0.159198	0.519558	0.177689	-0.230552	0.110827	-0.00201456	0.00201456
XR_002195150	NO	black	0.20724	-0.240846	0.365472	0.184229	0.432226	0.149796	0.376454	0.268546	0.129227	0.263623	0.490605	0.358081	0.00470121	-0.153833	-0.142177	-0.102792	0.102811	-0.146533	-0.0160569	-0.475007	-0.487733	-0.450148	0.212484	-0.318179	-0.236162	0.219191	0.0722735	0.196911	-0.196911
XM_005189206	NO	black	0.102779	-0.0944314	0.576979	0.587644	0.433411	0.265434	0.681644	0.4766	0.492913	0.398428	0.851678	0.598995	0.122534	0.143407	-0.287258	-0.118533	0.0437819	-0.519524	-0.459801	-0.497147	-0.835475	-0.811201	-0.135206	-0.566761	-0.197639	0.150544	0.0263616	0.289095	-0.289095
XM_020038825	NO	black	0.0250477	0.132491	-0.279484	-0.389896	-0.54854	-0.173206	-0.341841	-0.581837	-0.322227	-0.28743	-0.644168	-0.599518	0.33061	0.34809	0.215486	0.157384	0.122241	0.190876	0.220899	0.601239	0.577313	0.399267	-0.0802351	0.27502	0.0783115	-0.385626	0.277802	-0.164482	0.164482
XM_005189228	NO	black	0.0226275	0.183378	-0.458155	-0.80658	-0.639084	-0.470733	-0.690381	-0.313999	-0.239739	-0.122277	-0.760598	-0.455832	0.0811901	0.0675174	0.396031	-0.267512	-0.108472	0.390118	0.270506	0.532844	0.819225	0.669237	0.281196	0.425419	0.228852	-0.159778	0.247235	-0.112207	0.112207
XR_002195159	NO	black	0.15728	-0.122374	0.401619	0.292551	0.256843	0.106831	0.598007	0.29798	0.249591	0.430954	0.822838	0.572763	-0.0554718	0.0227791	-0.001028	-0.118837	0.202971	-0.469857	-0.362539	-0.425007	-0.759357	-0.709874	0.00662566	-0.470927	-0.174863	0.0835787	0.00301021	0.175086	-0.175086
XM_011296601	NO	black	-0.18228	0.0885254	-0.530151	-0.621262	-0.35362	-0.278305	-0.726723	-0.422783	-0.396625	-0.354092	-0.913819	-0.655683	0.0812868	-0.0297032	0.0761744	-0.00385127	-0.0781767	0.536628	0.444504	0.641758	0.882173	0.774954	0.311052	0.509077	0.146247	-0.237355	0.2058	-0.305815	0.305815
XM_005189285	NO	black	-0.109169	-0.131303	0.143877	-0.355053	-0.0869624	-0.00358999	-0.233247	-0.436292	-0.300667	-0.13319	-0.563192	-0.565346	0.258154	0.287248	-0.20906	0.0143026	0.117864	0.480708	0.275952	0.235093	0.445634	0.214484	0.554917	0.158743	0.0407657	0.0349107	0.459233	-0.331922	0.331922
XR_002195164	NO	black	-0.241832	-0.174775	-0.191123	-0.556076	-0.0920946	-0.148925	-0.432913	-0.387029	-0.46351	-0.160348	-0.658485	-0.549699	0.0338269	-0.0424777	0.0411364	-0.009706	0.11539	0.398948	0.345384	0.391145	0.56922	0.410865	0.549094	0.279234	-0.0192717	-0.166593	0.136474	-0.438972	0.438972
XM_005189297	NO	black	-0.0080747	0.0938566	-0.344919	-0.666329	-0.322914	-0.103716	-0.506482	-0.34374	-0.400572	-0.432822	-0.863899	-0.813771	0.117827	-0.0590692	0.113633	-0.171981	-0.152983	0.317972	0.423883	0.696941	0.748397	0.650083	0.4668	0.563025	0.197506	-0.118811	0.236835	-0.349346	0.349346
XM_005189328	NO	black	-0.212684	-0.0180958	-0.502798	-0.522223	-0.299588	-0.348139	-0.775429	-0.443916	-0.415243	-0.244049	-0.879601	-0.55786	0.031227	0.0071203	0.105006	0.0586153	-0.0179951	0.484477	0.520411	0.668039	0.892072	0.719865	0.131566	0.359661	-0.0408067	-0.32844	0.0968452	-0.285873	0.285873
XM_020038889	NO	black	0.19441	0.113774	0.343781	0.628678	0.26282	0.0983954	0.470154	0.362361	0.252295	0.382319	0.782551	0.647663	-0.131432	-0.172793	-0.1087	0.0473732	0.140631	-0.496725	-0.410312	-0.521216	-0.67762	-0.618505	-0.398267	-0.510689	-0.206931	0.0396933	-0.269913	0.157188	-0.157188
XM_005189350	NO	black	0.245864	0.289443	0.286729	0.760984	0.159493	-0.0662092	0.280639	0.328959	0.300902	0.462965	0.713921	0.682699	-0.0338122	-0.0888734	-0.238553	0.0923001	0.128691	-0.41449	-0.464809	-0.315854	-0.505838	-0.558028	-0.713245	-0.624656	-0.230764	-0.104802	-0.217781	0.185866	-0.185866
XM_005189354	NO	black	0.23463	-0.178669	0.499134	0.615092	0.512487	0.36183	0.677325	0.349038	0.171112	0.221282	0.779765	0.493103	-0.0763049	-0.234775	-0.186478	0.122873	0.176766	-0.300729	-0.208794	-0.660954	-0.796594	-0.689752	-0.0901049	-0.459445	-0.301184	0.16441	-0.141668	-0.0411821	0.0411821
XM_005189356	NO	black	0.0891531	-0.112752	0.284519	0.420783	0.358097	0.141808	0.479655	0.282704	0.359072	0.266437	0.675519	0.513656	0.342917	0.0393683	-0.197741	0.198945	0.173293	-0.491896	-0.223457	-0.296986	-0.62457	-0.55819	-0.282963	-0.454154	-0.23893	-0.00169638	0.114303	0.146388	-0.146388
XR_225703	NO	black	0.347265	0.293608	0.249051	0.256746	0.02919	-0.0728647	0.326705	0.410923	0.524357	0.388069	0.663724	0.586968	0.14072	0.0926015	-0.0234428	-0.259279	-0.0579668	-0.413853	-0.4347	-0.40201	-0.511773	-0.452477	-0.238616	-0.348793	0.0545134	0.157115	0.119802	0.439115	-0.439115
XM_020038915	NO	black	-0.0430849	-0.0197915	-0.278067	-0.387204	-0.367051	0.0633595	-0.216432	-0.471227	-0.450879	-0.507404	-0.673341	-0.693842	0.0203137	-0.030264	0.290541	0.174413	0.0498192	0.39036	0.434303	0.403954	0.509359	0.491113	0.321335	0.490323	0.0725736	-0.110078	0.127043	-0.382722	0.382722
XM_011296686	NO	black	-0.285716	-0.026409	-0.605443	-0.512205	-0.503342	-0.31616	-0.666358	-0.541663	-0.383809	-0.316237	-0.812766	-0.49783	0.0641546	0.114533	0.293477	0.200924	0.0468551	0.403989	0.438606	0.620209	0.812793	0.727245	0.0926005	0.440406	0.0965202	-0.297132	0.0371871	-0.188681	0.188681
XM_005189471	NO	black	-0.244044	0.0316067	0.110789	0.203189	0.137921	-0.00536197	0.127303	0.0190434	0.2004	0.265905	0.362855	0.414694	-0.133825	0.332779	-0.245807	0.0287602	0.0629556	-0.0982567	-0.361392	-0.306307	-0.280344	-0.218129	0.0750344	-0.169545	0.236547	0.257182	-0.0282489	0.305643	-0.305643
XM_005189502	NO	black	0.394698	0.20297	0.578498	0.687627	0.165719	-0.0883998	0.465574	0.243967	0.115622	0.696623	0.87541	0.722319	-0.0552027	-0.0855646	-0.120455	-0.0194533	0.321384	-0.421266	-0.567451	-0.398803	-0.670037	-0.855134	-0.482674	-0.831453	-0.337187	-0.133825	-0.0820702	0.00568195	-0.00568195
XR_002195199	NO	black	0.266586	0.107353	0.556093	0.517296	0.231583	0.255701	0.743892	0.372882	0.429291	0.344926	0.891278	0.542258	0.0867606	0.114219	-0.203986	-0.0926591	0.0696881	-0.484362	-0.48877	-0.567839	-0.862987	-0.776129	-0.190943	-0.45301	-0.028205	0.261031	0.12745	0.289676	-0.289676
XM_020038965	NO	black	0.016159	-0.161034	0.31771	0.353227	0.331475	0.0962775	0.448522	0.416326	0.449894	0.36868	0.728107	0.666715	0.00228551	0.00272892	-0.118412	-0.043924	0.102097	-0.461063	-0.197704	-0.55304	-0.635662	-0.53008	-0.0137941	-0.40591	-0.188561	0.275436	-0.033671	0.327543	-0.327543
XM_005189625	NO	black	-0.136788	-0.252056	-0.0801981	0.377584	0.348929	-0.0912749	0.133832	0.417702	0.235555	0.339211	0.574756	0.710501	-0.156725	-0.32737	0.132844	0.115606	0.114249	-0.273652	-0.0808569	-0.270923	-0.421094	-0.317603	-0.326159	-0.425422	-0.446399	-0.218097	-0.398067	0.0278281	-0.0278281
XR_891722	NO	black	0.18216	0.110246	0.481565	0.625466	0.298738	-0.00327361	0.452522	0.177927	0.264186	0.536413	0.782596	0.676016	0.204648	0.144189	-0.189132	0.158433	0.323753	-0.501776	-0.477091	-0.3891	-0.636426	-0.741241	-0.450596	-0.719248	-0.288869	-0.0831719	0.0271137	0.0854894	-0.0854894
XM_005189637	NO	black	-0.307124	-0.098183	-0.756254	-0.702881	-0.326989	-0.1343	-0.634058	-0.384746	-0.340221	-0.590022	-0.904037	-0.64964	0.030364	-0.0754511	0.279315	0.156164	-0.135072	0.464086	0.54802	0.534755	0.797822	0.908736	0.264684	0.727103	0.222274	-0.157727	-0.00313231	-0.213907	0.213907
XM_020038991	NO	black	0.263582	-0.00624269	0.314748	0.342879	0.188727	0.0394679	0.49221	0.312546	0.249724	0.401852	0.785917	0.639821	0.0193256	-0.132255	0.0381168	0.0076213	0.233121	-0.416282	-0.319236	-0.527534	-0.670801	-0.606923	-0.159168	-0.472489	-0.210964	0.0455312	-0.00898998	0.0764649	-0.0764649
XR_002195223	NO	black	0.179976	0.274419	0.291857	0.629326	0.0893962	0.00791287	0.439641	0.349908	0.296301	0.462647	0.794098	0.660691	-0.0462924	-0.0132613	-0.144777	-0.0418546	0.080367	-0.539345	-0.763608	-0.305594	-0.648673	-0.641834	-0.545995	-0.531835	0.0590041	-0.0170979	-0.327217	0.289839	-0.289839
XM_005189694	NO	black	-0.293089	-0.269358	-0.533128	-0.739714	-0.30458	0.0242803	-0.42397	-0.434242	-0.330795	-0.638939	-0.859541	-0.762562	0.0403697	0.0842773	0.376754	0.113864	-0.0998483	0.369391	0.714673	0.509166	0.672043	0.769784	0.449261	0.731639	0.104132	-0.0497273	0.119387	-0.181121	0.181121
XM_020039011	NO	black	-0.172171	-0.105958	-0.167627	-0.58523	-0.145072	-0.162577	-0.371432	-0.38446	-0.256419	-0.126442	-0.580324	-0.530405	0.174931	0.347997	0.0848676	-0.192052	0.0480769	0.0228964	0.338289	0.651477	0.510561	0.326793	0.499722	0.24153	-0.00963472	-0.196624	0.280008	-0.136622	0.136622
XM_005189705	NO	black	0.148123	0.204099	-0.0311565	-0.51597	-0.20236	-0.0678835	-0.264222	-0.186205	-0.362755	-0.161226	-0.501103	-0.620543	-0.0592187	-0.0634136	0.0406192	-0.399893	-0.138922	0.0242739	0.115701	0.538539	0.418309	0.280895	0.448909	0.329973	0.216257	-0.0269343	0.126754	-0.250328	0.250328
XM_005189712	NO	black	0.180548	0.201626	-0.117366	-0.481754	-0.301396	0.0527728	-0.296523	-0.254973	-0.232995	-0.460391	-0.729933	-0.804775	0.156978	0.0616432	0.0320676	-0.233426	-0.253597	0.167396	0.317344	0.51124	0.575919	0.500658	0.333519	0.530315	0.28575	0.0781271	0.23789	-0.15376	0.15376
XM_005189814	NO	black	0.181945	-0.130959	0.432651	0.520772	0.307874	0.295911	0.741117	0.268445	0.246919	0.264697	0.832405	0.562521	0.0324184	-0.00636551	-0.0213268	0.129281	0.257925	-0.523933	-0.377866	-0.596434	-0.83852	-0.729208	-0.115089	-0.457194	-0.179999	0.134092	-0.124691	0.113704	-0.113704
XR_891726	NO	black	0.236798	0.0341964	0.509382	0.615082	0.327067	0.0499497	0.392585	0.402608	0.491777	0.529546	0.72698	0.66611	0.120252	0.250759	-0.406247	-0.16239	0.033139	-0.386742	-0.593167	-0.457928	-0.593169	-0.681918	-0.260313	-0.640698	-0.0422065	0.142631	-0.0960674	0.414266	-0.414266
XM_005189839	NO	black	-0.321693	-0.15244	-0.652682	-0.63943	-0.11731	0.0378621	-0.579825	-0.271053	-0.293948	-0.704223	-0.91469	-0.723394	-0.0830181	-0.165967	0.126874	0.0882029	-0.304181	0.504485	0.662488	0.430639	0.749127	0.933896	0.381893	0.830798	0.262225	0.0546402	-0.00998197	-0.162036	0.162036
XM_011296818	NO	black	0.0981812	-0.173356	0.473543	0.534708	0.471	0.310231	0.708063	0.442866	0.282473	0.291924	0.840771	0.55907	-0.0975727	-0.182313	-0.0677323	-0.0221686	0.10799	-0.50311	-0.277926	-0.548508	-0.854915	-0.732716	-0.0449041	-0.448919	-0.280966	0.170933	-0.161983	0.154871	-0.154871
XR_002195256	NO	black	0.508648	0.305183	0.492469	0.500239	-0.064718	-0.052133	0.306444	0.211122	0.231922	0.422868	0.574504	0.479731	-0.0234445	-0.0034931	-0.0914069	-0.113594	0.0772621	-0.158776	-0.27933	-0.440877	-0.401439	-0.515279	-0.373233	-0.492886	-0.143152	0.127698	0.163793	0.100984	-0.100984
XM_005190065	NO	black	0.0722754	0.0123601	0.169796	0.623211	0.506482	0.10774	0.384451	0.63043	0.44151	0.351149	0.816608	0.757889	-0.07043	-0.325423	-0.295413	0.0122117	-0.0787101	-0.412592	-0.422253	-0.493303	-0.68838	-0.513739	-0.47666	-0.457857	-0.132666	0.0938919	-0.321027	0.20813	-0.20813
XR_002195278	NO	black	0.0257624	-0.223437	0.452756	0.456549	0.447704	0.189718	0.646322	0.36126	0.379471	0.384545	0.839622	0.64886	0.0913354	0.0468764	-0.0399911	0.0530922	0.223699	-0.428319	-0.210813	-0.546861	-0.808164	-0.747351	-0.0940007	-0.557491	-0.425453	0.0433668	0.100081	0.11781	-0.11781
XR_002195277	NO	black	0.187988	-0.0915992	0.571741	0.477946	0.188373	0.0684387	0.66683	0.175057	0.254638	0.560472	0.877912	0.650231	0.0336189	0.235964	0.0199747	-0.0123306	0.389814	-0.565473	-0.44618	-0.475392	-0.794345	-0.884403	-0.160546	-0.699029	-0.336091	-0.0289167	0.0205872	0.144013	-0.144013
XM_020039131	NO	black	0.0262031	-0.0558899	0.412169	0.551272	0.319727	0.216611	0.681803	0.36776	0.367623	0.365673	0.909311	0.655737	-0.0409286	0.00151259	-0.152996	0.0590006	0.132962	-0.525205	-0.432076	-0.552932	-0.863789	-0.731396	-0.251827	-0.469976	-0.121768	0.178363	-0.0691122	0.213949	-0.213949
XR_002195289	NO	black	0.174348	0.0965815	0.386246	0.331958	0.28419	0.236706	0.43803	0.637448	0.644742	0.213774	0.627118	0.436723	0.156564	0.0688896	-0.406069	-0.37093	-0.337289	-0.444326	-0.33466	-0.377023	-0.591472	-0.455518	-0.0561828	-0.215104	0.1348	0.418833	0.167141	0.524537	-0.524537
XR_002195292	NO	black	0.204826	0.221817	0.349863	0.540324	0.231757	-0.134747	0.321036	0.438122	0.229418	0.634693	0.806004	0.752068	-0.153359	-0.213176	-0.0672572	-0.153361	0.0725405	-0.386645	-0.661484	-0.314303	-0.595715	-0.658941	-0.458125	-0.644064	-0.124815	-0.06448	-0.259649	0.0793246	-0.0793246
XM_020039140	NO	black	-0.165013	0.0725898	-0.440227	-0.7998	-0.389614	-0.239619	-0.57692	-0.375019	-0.317786	-0.309028	-0.811599	-0.625719	-0.00435447	0.0510045	0.172433	-0.205349	-0.104851	0.263161	0.355423	0.490129	0.738645	0.691617	0.540985	0.586407	0.309823	-0.0150618	0.210817	-0.143809	0.143809
XM_020039142	NO	black	-0.0231866	0.0456467	0.226019	0.0670776	0.0976564	0.128058	0.231442	-0.00326787	0.378908	0.114956	0.263663	0.179802	0.161622	0.61019	-0.38008	-0.100835	-0.0113462	-0.194557	-0.291032	-0.355143	-0.274778	-0.203727	0.200341	-0.0471113	0.373428	0.453533	0.182048	0.543243	-0.543243
XM_005190216	NO	black	-0.489607	-0.360136	-0.620266	-0.328741	0.253805	0.263648	-0.334099	-0.169865	-0.208999	-0.745435	-0.674605	-0.54719	-0.0752497	-0.223555	-0.0251444	0.324962	-0.231496	0.340208	0.580576	0.183568	0.434943	0.74825	0.301246	0.723002	0.170847	0.0693227	-0.270524	-0.115623	0.115623
XM_005190367	NO	black	-0.373743	-0.0506786	-0.0706797	0.00245562	-0.381291	-0.0240844	-0.0926508	-0.452847	-0.281737	-0.133006	-0.292548	-0.273485	0.107991	0.206994	0.0806982	0.402744	0.23028	0.0408445	0.0655721	0.317876	0.24152	0.127601	-0.135155	0.0883569	0.0144586	-0.189024	0.0224685	-0.265916	0.265916
XM_005190398	NO	black	0.248423	0.115779	0.55144	0.753834	0.291161	0.113241	0.59436	0.33213	0.225062	0.529088	0.900472	0.67062	-0.0618386	-0.0717712	-0.244174	0.0161631	0.237861	-0.51739	-0.566243	-0.458179	-0.779684	-0.836322	-0.370386	-0.698741	-0.231171	0.0283741	-0.196857	0.116396	-0.116396
XM_005190421	NO	black	0.0568825	0.194694	-0.363364	-0.662222	-0.486384	-0.361221	-0.619183	-0.476621	-0.41842	-0.153447	-0.770462	-0.60376	0.0309717	0.178586	0.270248	-0.213248	-0.0314769	0.361131	0.146162	0.635552	0.767937	0.566553	0.234855	0.369982	0.261212	-0.252449	0.0571133	-0.119751	0.119751
XM_011297057	NO	black	-0.0147105	0.0750487	-0.0814136	-0.235385	-0.330348	-0.105108	-0.299903	-0.403878	-0.138319	-0.205851	-0.55296	-0.482059	0.288247	0.383515	0.0521806	0.0451592	0.0211786	0.143783	0.153187	0.468748	0.500809	0.306104	-0.00569866	0.186932	0.101258	-0.165242	0.193496	-0.0322125	0.0322125
XM_020039288	NO	black	0.153487	0.0783098	0.372182	0.614981	0.356342	0.178255	0.533903	0.628124	0.393439	0.360545	0.838805	0.684237	-0.148235	-0.36183	-0.215429	-0.0937061	-0.0764394	-0.369978	-0.512229	-0.591054	-0.752018	-0.614866	-0.286923	-0.432573	-0.0522313	0.241568	-0.260269	0.229051	-0.229051
XM_020039296	NO	black	0.24424	0.0933853	0.473387	0.456249	0.161856	0.16832	0.549989	0.40737	0.692594	0.330215	0.723038	0.53747	0.24193	0.495985	-0.210259	-0.232465	-0.0778583	-0.585266	-0.478777	-0.414505	-0.665759	-0.634911	-0.251228	-0.4287	0.035732	0.263047	0.0792749	0.676564	-0.676564
XM_011297132	NO	black	-0.051823	-0.185869	0.415659	0.611154	0.594237	0.273025	0.639307	0.376616	0.362879	0.326071	0.828999	0.601074	0.0342298	0.0486628	-0.213996	0.0904157	0.112849	-0.476684	-0.409359	-0.481326	-0.838085	-0.735083	-0.261505	-0.521307	-0.23795	0.053436	-0.188457	0.271259	-0.271259
XM_020039307	NO	black	-0.186531	-0.416439	0.324481	0.400312	0.638712	0.320479	0.618529	0.336577	0.355723	0.186198	0.704137	0.478477	0.104413	0.0504479	-0.106827	0.121	0.11967	-0.41187	-0.0626649	-0.403851	-0.773974	-0.618865	-0.0163745	-0.383152	-0.393857	0.04116	0.00380069	0.227435	-0.227435
XM_020039306	NO	black	0.000155903	-0.278041	0.369601	0.493428	0.544682	0.311524	0.686753	0.308961	0.252667	0.2419	0.791989	0.494847	-0.0121157	-0.00665493	-0.0681841	0.0977045	0.167939	-0.491583	-0.291619	-0.430523	-0.838145	-0.706599	-0.154044	-0.439929	-0.274937	0.0277256	-0.21993	0.207959	-0.207959
XM_005190618	NO	black	-0.0926894	-0.161589	-0.324157	-0.393356	-0.133729	-0.0729138	-0.457078	-0.383074	-0.325662	-0.385606	-0.721435	-0.569877	0.045133	0.0596657	0.0919964	0.150662	-0.0126262	0.611954	0.633316	0.386514	0.640318	0.565847	0.125994	0.35428	-0.155683	-0.184317	0.222344	-0.254628	0.254628
XM_020039362	NO	black	-0.12719	0.100739	0.203381	0.00103456	0.0482349	0.0865485	0.176713	0.323465	0.440741	0.107983	0.260786	0.194339	0.281075	0.126108	-0.268246	-0.247305	-0.20324	-0.365371	-0.0504317	-0.066216	-0.235553	-0.164563	0.268413	-0.00553405	0.121068	0.349052	0.451262	0.282365	-0.282365
XM_020039364	NO	black	0.256689	0.0158503	0.547462	0.694056	0.370661	0.30384	0.762344	0.438598	0.376509	0.318188	0.925323	0.627193	0.0245289	-0.0836851	-0.117056	0.0701796	0.0928141	-0.396018	-0.434305	-0.662671	-0.901883	-0.794628	-0.366068	-0.531339	-0.208009	0.183154	-0.0710803	0.183453	-0.183453
XM_011297221	NO	black	0.299166	0.279841	0.3465	0.676228	0.0234063	-0.104896	0.286706	0.166611	0.0681804	0.561756	0.713136	0.666544	-0.277824	-0.0533425	-0.214197	0.00807342	0.229251	-0.181142	-0.599646	-0.39965	-0.49116	-0.602207	-0.455624	-0.630333	-0.086003	-0.0625719	-0.221719	0.0843876	-0.0843876
XM_005190799	NO	black	-0.0935844	0.0354268	0.115354	0.180644	-0.112065	-0.00415667	-0.194439	-0.304753	-0.093751	-0.0707453	-0.33931	-0.279726	0.194507	0.339528	-0.303742	0.193682	0.0985309	-0.164859	0.154357	0.312997	0.314007	0.0866227	-0.184946	-0.0675908	-0.106856	-0.125088	0.0545226	-0.0307541	0.0307541
XM_005190829	NO	black	0.383529	0.109724	0.569545	0.662677	0.303985	0.276913	0.685072	0.412402	0.336832	0.342808	0.882107	0.592644	-0.0535606	-0.0369972	-0.277307	-0.0254708	0.049036	-0.312286	-0.569868	-0.665612	-0.819052	-0.745264	-0.317975	-0.500855	0.010788	0.278583	-0.0778285	0.180635	-0.180635
XM_020039383	NO	black	0.266156	0.0798547	0.553801	0.494335	0.137879	0.0260358	0.626114	0.376634	0.363819	0.594786	0.929176	0.725179	-0.00850339	0.0775973	0.0106053	-0.16297	0.207167	-0.529475	-0.583301	-0.500857	-0.801432	-0.854342	-0.227175	-0.66461	-0.204698	0.0449636	-0.0108779	0.23147	-0.23147
XR_891767	NO	black	0.298326	-0.0329085	0.661072	0.549627	0.392458	0.32173	0.786767	0.283998	0.259328	0.362263	0.874052	0.497628	-0.0124375	0.0909452	-0.250858	-0.0501194	0.19827	-0.455517	-0.456667	-0.629734	-0.883635	-0.849446	-0.0568892	-0.52642	-0.122935	0.246977	0.030462	0.178426	-0.178426
XM_005190848	NO	black	-0.142874	0.0147647	-0.00425345	-0.0222127	-0.277745	0.0588781	-0.0940514	-0.352535	0.0867088	-0.255105	-0.346137	-0.291344	0.35434	0.528764	-0.0579875	0.274961	0.07721	-0.134237	0.22567	0.135825	0.263	0.188482	-0.159884	0.141991	0.00656611	-0.046305	0.267247	0.121914	-0.121914
XM_005190860	NO	black	0.0734958	-0.165466	0.57081	0.628751	0.424177	0.298226	0.771599	0.348678	0.31356	0.389378	0.920375	0.639661	0.00972448	0.0329329	-0.147172	0.08171	0.20856	-0.529253	-0.458082	-0.613399	-0.917981	-0.854456	-0.1685	-0.57753	-0.224361	0.147365	-0.113291	0.153597	-0.153597
XM_020039404	NO	black	0.318678	0.325063	0.368616	0.723344	0.0632131	-0.190622	0.261898	0.309199	0.315017	0.652926	0.787927	0.7819	-0.01696	0.0605072	-0.172452	-0.0222252	0.148601	-0.319449	-0.625968	-0.299977	-0.516466	-0.663345	-0.736538	-0.760028	-0.201769	-0.158202	-0.148242	0.233938	-0.233938
XM_020039418	NO	black	0.574268	0.456052	0.37201	0.296924	0.0375419	-0.102073	0.206346	0.313754	0.151884	0.423895	0.503385	0.408085	-0.0686939	-0.175364	-0.191771	-0.290986	-0.102704	0.00386908	-0.608494	-0.396222	-0.344624	-0.418417	-0.356557	-0.375827	0.192578	0.110152	0.101782	0.0160322	-0.0160322
XM_020039431	NO	black	0.34853	0.155621	0.404378	0.523006	0.240065	0.164611	0.598282	0.5089	0.497603	0.363566	0.87742	0.643227	-0.0755026	0.0195127	-0.118182	-0.193955	-0.0643729	-0.52283	-0.61123	-0.591591	-0.793978	-0.661489	-0.360191	-0.421127	0.0895479	0.259285	-0.241159	0.458685	-0.458685
XM_020039433	NO	black	-0.403802	-0.167629	-0.0564615	-0.308628	-0.0308188	-0.020854	-0.193697	-0.205732	-0.207696	-0.104069	-0.406306	-0.333001	0.156704	0.0649979	-0.108854	0.084267	0.0248643	0.301925	0.0648907	0.238723	0.296937	0.19684	0.284616	0.161986	0.0667393	-0.0914991	0.237082	-0.333631	0.333631
XM_005191093	NO	black	0.316392	-0.0193366	0.587332	0.588817	0.544754	0.338335	0.676415	0.536209	0.233313	0.308107	0.792448	0.436768	-0.147458	-0.292985	-0.278997	-0.213661	-0.0434688	-0.392404	-0.440955	-0.51492	-0.815093	-0.75408	-0.0839699	-0.462016	-0.143944	0.203758	-0.203437	0.0791016	-0.0791016
XM_020039492	NO	black	-0.177924	0.0373784	-0.10417	0.0671072	0.264125	0.0775807	0.126859	0.265822	0.272967	0.0289101	0.264212	0.23999	0.0510802	-0.0545953	-0.236016	-0.0613491	-0.0997454	-0.418892	-0.315508	-0.0998011	-0.267667	-0.094799	0.00894461	0.0138147	0.220944	0.053079	-0.117118	0.182654	-0.182654
XM_005191159	NO	black	0.318577	0.0327252	0.145317	-0.0981865	-0.200253	-0.0985394	0.140199	0.173437	0.31471	0.220244	0.261753	0.30281	0.173222	0.208913	0.180913	-0.181189	0.0653785	-0.204312	-0.129699	-0.305103	-0.160862	-0.173624	0.0767346	-0.161819	0.029829	0.223321	0.0974451	0.271593	-0.271593
XM_011297503	NO	black	-0.0545247	-0.222608	0.225811	-0.043059	-0.0355477	0.122799	-0.016738	-0.521924	-0.254217	-0.217098	-0.445962	-0.516643	0.457381	0.419261	-0.036797	0.332124	0.254845	0.269272	0.395398	0.267786	0.283009	0.0306226	0.0748221	-0.0244932	-0.315136	-0.236911	0.46054	-0.313107	0.313107
XM_020039551	NO	black	-0.222767	-0.294912	-0.36497	-0.529252	-0.156559	-0.100984	-0.474713	-0.548159	-0.420114	-0.376284	-0.767047	-0.571406	0.0732525	0.0996351	0.187589	0.224841	0.122521	0.705999	0.595766	0.280195	0.658381	0.597682	0.442754	0.413577	-0.040519	-0.16329	0.20923	-0.323536	0.323536
XM_005191345	NO	black	0.141887	0.109687	0.0241161	-0.190767	-0.244946	0.0926054	-0.244866	-0.388829	-0.284629	-0.392972	-0.661281	-0.689032	0.165505	0.15212	-0.117347	0.0509949	-0.0478601	0.297147	0.340497	0.328543	0.531771	0.381641	0.213265	0.328388	0.122498	0.0537891	0.242877	-0.241074	0.241074
XM_011297525	NO	black	0.00704695	-0.00657958	-0.0988457	-0.427827	-0.318018	0.0851844	-0.194848	-0.5639	-0.437084	-0.426767	-0.652344	-0.777887	0.0385292	0.268532	0.189205	4.08946e-05	0.0505317	0.155378	0.334754	0.473825	0.473933	0.38061	0.402444	0.449234	0.178928	-0.0602085	0.0877821	-0.198908	0.198908
XM_011297543	NO	black	0.0342821	0.215307	0.419714	0.549242	0.0863475	0.105505	0.542546	0.355798	0.510377	0.405429	0.812733	0.640986	0.120946	0.231479	-0.176985	-0.029281	0.00814956	-0.488647	-0.654798	-0.439928	-0.71571	-0.652351	-0.369052	-0.443927	0.117064	0.217428	7.88502e-05	0.405428	-0.405428
XM_020039590	NO	black	-0.0591202	0.00174322	-0.158561	-0.441269	-0.474051	-0.121177	-0.329296	-0.451835	-0.294199	-0.259005	-0.645874	-0.599465	0.22901	0.304372	0.23011	0.0287939	0.0558874	0.330739	0.373226	0.61085	0.582883	0.392642	0.219653	0.283176	-0.00875622	-0.172417	0.325147	-0.215015	0.215015
XM_011297556	NO	black	0.126859	0.292439	0.265751	0.00632669	-0.100526	0.00750797	0.322334	0.284103	0.241268	0.237905	0.412934	0.182344	0.10659	-0.0115348	-0.0169425	-0.381698	-0.11828	-0.346664	-0.354507	0.0223063	-0.375035	-0.375441	0.107833	-0.128945	0.120757	0.0657478	0.373849	0.0749538	-0.0749538
XM_020039614	NO	black	0.0147571	-0.167784	0.26221	0.439838	0.24332	0.120949	0.457367	-0.0984894	-0.153842	0.30558	0.62439	0.488771	-0.0831612	-0.0304197	-0.0376919	0.419306	0.525077	-0.321553	-0.259324	-0.428149	-0.569475	-0.553068	-0.110934	-0.470271	-0.241193	-0.0505654	-0.19395	-0.194494	0.194494
XM_005191501	NO	black	-0.015923	-0.0953782	-0.246784	-0.298716	0.106972	0.0806247	-0.374743	-0.423194	-0.588426	-0.44593	-0.715092	-0.671129	-0.143521	-0.219029	-0.0404774	0.159312	0.0149475	0.508325	0.362184	0.251479	0.550304	0.518776	0.3236	0.416097	0.0996148	-0.100655	-0.1489	-0.468713	0.468713
XM_005191507	NO	black	0.336286	0.317973	0.348228	0.442534	0.0392419	-0.328325	0.123348	0.481069	0.387517	0.751987	0.703461	0.778729	-0.13755	-0.0154219	-0.0155461	-0.382747	0.0206839	-0.354088	-0.635553	-0.236337	-0.40409	-0.57997	-0.426183	-0.692754	-0.145703	-0.0526629	-0.239578	0.364419	-0.364419
XM_020039628	NO	black	0.438862	0.537578	0.288831	0.209761	-0.0406307	-0.089545	0.0632863	0.129063	-0.133495	0.250937	0.195487	0.0769861	-0.248695	-0.270309	-0.0173598	-0.355831	-0.131052	-0.00774197	-0.431495	-0.0313213	-0.113944	-0.236133	-0.154273	-0.173987	0.157845	0.00879943	-0.0386284	-0.0127865	0.0127865
XR_002195453	NO	black	0.419447	0.190381	0.551838	0.68487	0.271359	0.25533	0.644433	0.486234	0.368223	0.348633	0.874843	0.598552	-0.218854	-0.0685441	-0.17055	-0.196722	-0.0811851	-0.446885	-0.573542	-0.623381	-0.807537	-0.719661	-0.334806	-0.455766	0.032695	0.296466	-0.257512	0.397113	-0.397113
XM_011297598	NO	black	-0.0437628	-0.000861578	0.205662	0.386437	0.169827	0.0699662	0.33149	0.452692	0.607686	0.204697	0.568263	0.574312	0.376242	0.0356339	-0.0641068	0.146737	-0.0603443	-0.470053	-0.134109	-0.358731	-0.488435	-0.380937	-0.516335	-0.338426	-0.244056	0.0416285	0.203687	0.253151	-0.253151
XM_005191558	NO	black	-0.22648	0.00441065	-0.608204	-0.737236	-0.352756	-0.311472	-0.769953	-0.397388	-0.487635	-0.346175	-0.939332	-0.654386	-0.108925	-0.131474	0.236905	-0.0849559	-0.103333	0.426941	0.480348	0.717901	0.908807	0.825493	0.379152	0.56662	0.145833	-0.236816	0.00899519	-0.297083	0.297083
XM_005191799	NO	black	-0.0407912	0.158523	-0.405157	-0.741777	-0.477301	-0.441425	-0.716879	-0.372323	-0.273567	-0.106343	-0.793958	-0.521493	0.192717	0.211543	0.20744	-0.230987	-0.0746413	0.343729	0.29898	0.731543	0.842694	0.61708	0.241695	0.332056	0.122396	-0.28028	0.341798	-0.160975	0.160975
XM_020039716	NO	black	-0.0291125	0.0628714	-0.39733	-0.38707	-0.256632	-0.15521	-0.516338	-0.255092	-0.160258	-0.337521	-0.666676	-0.448736	0.246367	0.0263166	0.185549	0.0324587	-0.158137	0.0737525	0.373183	0.477879	0.626987	0.587733	0.0254403	0.394028	0.109853	-0.164957	0.0306148	-0.0350381	0.0350381
XM_005191811	NO	black	0.116339	-0.136501	0.547463	0.585586	0.341757	0.272837	0.782522	0.260219	0.264639	0.376243	0.904539	0.611384	0.094422	0.064757	-0.0573545	0.139557	0.300263	-0.5716	-0.44683	-0.569113	-0.900683	-0.854707	-0.165851	-0.580069	-0.246032	0.0818477	-0.0679861	0.0989222	-0.0989222
XM_005191859	NO	black	0.0963173	-0.0211706	0.569883	0.554353	0.365891	0.360069	0.779398	0.239897	0.288485	0.2393	0.827252	0.450721	-0.00697748	0.0887553	-0.217672	0.0891135	0.142152	-0.408391	-0.388401	-0.598976	-0.869079	-0.754821	-0.155159	-0.401031	-0.0861892	0.231977	0.103439	0.131741	-0.131741
XM_005191866	NO	black	-0.167946	-0.0470496	-0.359864	-0.566865	-0.200086	0.0338457	-0.463237	-0.190962	-0.280577	-0.538156	-0.787272	-0.645754	-0.108938	-0.211943	0.15268	-0.0671053	-0.300696	0.528728	0.562897	0.271983	0.64899	0.739315	0.475517	0.694107	0.227371	0.17522	0.122985	-0.168134	0.168134
XM_005191874	NO	black	-0.217223	-0.126712	-0.552573	-0.633955	-0.345089	-0.257354	-0.690829	-0.39985	-0.348666	-0.39079	-0.881866	-0.594432	0.042764	-0.0061671	0.333115	0.0756018	-0.104502	0.561372	0.633924	0.608343	0.84493	0.782367	0.173864	0.508002	-0.0162303	-0.257064	0.131079	-0.231598	0.231598
XM_020039742	NO	black	-0.336524	-0.354202	-0.236103	-0.421005	0.0317442	0.263412	-0.120818	-0.351735	-0.305551	-0.634849	-0.633883	-0.68057	-0.0661925	-0.0727093	0.166444	0.249962	-0.0239192	0.32801	0.683053	0.109766	0.359609	0.504526	0.423836	0.600503	-0.0402409	0.0636156	0.0997662	-0.274917	0.274917
XM_020039746	NO	black	-0.312706	-0.183016	0.0123579	0.105356	0.05019	0.0324954	0.178309	0.168197	0.360188	0.0958618	0.305161	0.376635	0.000246507	0.132436	-0.0112903	0.127453	-0.0632094	-0.0274456	0.0813295	-0.358853	-0.276653	-0.121423	-0.154036	-0.0611756	-0.0896275	0.17259	0.241843	0.229916	-0.229916
XM_020039755	NO	black	-0.312706	-0.183016	0.0123579	0.105356	0.05019	0.0324954	0.178309	0.168197	0.360188	0.0958618	0.305161	0.376635	0.000246507	0.132436	-0.0112903	0.127453	-0.0632094	-0.0274456	0.0813295	-0.358853	-0.276653	-0.121423	-0.154036	-0.0611756	-0.0896275	0.17259	0.241843	0.229916	-0.229916
XM_011297753	NO	black	-0.128309	0.164953	-0.632792	-0.609412	-0.334044	-0.215719	-0.742418	-0.247742	-0.270732	-0.476445	-0.894484	-0.626692	-0.062076	-0.158728	0.0873442	-0.0494726	-0.307706	0.526489	0.413546	0.503589	0.859145	0.905388	0.131229	0.67545	0.332505	-0.0615321	0.00931549	-0.131517	0.131517
XM_005191999	NO	black	-0.194286	0.00563482	-0.390872	-0.559182	-0.304084	-0.0725264	-0.46406	-0.527867	-0.409507	-0.4238	-0.834745	-0.760516	0.147657	0.176523	-0.0149339	0.036033	-0.00999046	0.277985	0.276505	0.569345	0.687514	0.609647	0.400204	0.527498	0.309956	-0.134914	0.105141	-0.262358	0.262358
XM_005192023	NO	black	0.345253	0.258552	0.426936	0.536444	0.1437	-0.0310043	0.355787	0.484835	0.429003	0.515567	0.786727	0.746938	-0.110335	-0.104354	-0.256808	-0.154699	-0.04689	-0.113306	-0.490607	-0.66225	-0.58044	-0.556648	-0.361803	-0.509373	0.00316709	0.300507	0.0537754	0.279426	-0.279426
XM_005192054	NO	black	0.0258838	0.0809348	0.2002	0.127337	-0.0123153	-0.111084	0.285146	0.403666	0.676847	0.346896	0.529917	0.549141	0.528278	0.274696	0.110768	-0.140802	-0.0467252	-0.334986	-0.135608	-0.176374	-0.411995	-0.408934	-0.218342	-0.369344	-0.26582	-0.0159914	0.531259	0.393839	-0.393839
XM_005192149	NO	black	-0.131217	-0.117728	-0.00513448	-0.283222	-0.00785198	0.078698	-0.151856	-0.0410932	-0.0661195	-0.233378	-0.386546	-0.38763	-0.0641488	0.0438509	0.155071	-0.249207	-0.233379	0.125237	0.355971	0.290333	0.269018	0.248763	0.431042	0.303856	-0.00658447	0.098203	0.0973713	0.0709242	-0.0709242
XM_005192162	NO	black	0.113949	0.103657	-0.0770148	-0.389268	-0.464412	-0.147412	-0.256796	-0.584955	-0.592467	-0.146783	-0.579481	-0.660661	0.0919025	0.132365	0.188755	-0.0529305	0.192179	0.426804	0.176825	0.611357	0.507814	0.230251	0.324687	0.179802	0.0138369	-0.359402	0.291767	-0.468836	0.468836
XM_020039825	NO	black	-0.195513	-0.304704	-0.279986	0.0723098	-0.0183377	0.029878	-0.124054	-0.393101	-0.392616	-0.196598	-0.247284	-0.113809	0.0208884	-0.0602056	0.0905509	0.602331	0.401631	0.0079844	0.162378	0.0509787	0.192144	0.184529	-0.129882	0.0170373	-0.157065	-0.273462	-0.432443	-0.333103	0.333103
XM_020040095	NO	blue	-0.129553	-0.0935141	-0.381394	-0.313442	-0.225169	-0.676348	-0.498057	-0.0290185	0.0240294	0.527942	0.0534556	0.508645	-0.095625	0.0225558	0.285591	-0.112069	0.244628	0.0822728	0.0106858	0.150683	0.263418	0.12136	0.0403159	-0.272582	-0.190341	-0.298909	-0.0339791	0.070366	-0.070366
XM_005174717	NO	blue	0.185656	0.301579	-0.251873	-0.366279	-0.627887	-0.867129	-0.542307	-0.278709	-0.325214	0.668094	-0.0883764	0.232119	0.0103478	0.0651614	0.460558	-0.26672	0.45177	-0.109659	-0.193917	0.663432	0.435126	-0.0192721	-0.102126	-0.445838	-0.307384	-0.729704	0.050015	-0.179614	0.179614
XM_020034760	NO	blue	0.123981	0.087876	0.298943	0.599133	0.512592	0.553235	0.562146	0.601341	0.272459	-0.17467	0.520468	0.198299	-0.242261	-0.521114	-0.312153	-0.0169797	-0.392949	-0.178169	-0.379894	-0.57787	-0.648145	-0.321076	-0.271731	0.0304642	0.237618	0.421353	-0.433734	0.103174	-0.103174
XM_020034844	NO	blue	0.0497997	-0.00605481	0.297868	-0.136373	0.240229	0.524128	0.363031	0.219193	0.235778	-0.425213	-0.0502683	-0.386887	0.238355	-0.000305336	-0.158146	-0.233158	-0.397469	-0.124318	0.0536779	-0.195369	-0.210347	0.0103978	0.49693	0.431155	0.391622	0.580587	0.2366	0.157364	-0.157364
XM_020034975	NO	blue	-0.171066	-0.189897	-0.30119	-0.0056327	-0.0532809	-0.360758	-0.194378	0.151308	0.227751	0.237527	0.135909	0.484275	0.134968	-0.108308	0.393414	0.214048	0.157068	0.10805	0.261236	-0.063913	0.0358878	0.0316931	-0.369427	-0.270401	-0.561775	-0.378923	0.0704773	0.0498544	-0.0498544
XM_005174761	NO	blue	0.0432632	-0.210304	0.368525	0.254785	0.431379	0.831822	0.782705	0.211635	0.267115	-0.541387	0.246417	-0.274737	0.17291	0.0306652	-0.318796	0.133294	-0.265986	-0.274833	0.021126	-0.501892	-0.609163	-0.25015	0.10774	0.307124	0.257762	0.552451	0.115913	0.0674795	-0.0674795
XM_011293191	NO	blue	0.0656635	0.185557	-0.418649	-0.521883	-0.448897	-0.805677	-0.749942	-0.204377	-0.209182	0.432925	-0.392115	0.0317733	0.190201	0.0770685	0.318427	-0.27002	0.196625	0.208666	-0.00884143	0.705065	0.661175	0.27745	-0.0447456	-0.219915	-0.224296	-0.684214	0.143143	-0.178795	0.178795
XM_005174775	NO	blue	-0.0762089	-0.16035	0.103577	0.145651	0.610181	0.611218	0.275386	0.135189	0.116105	-0.527588	-0.107166	-0.404347	0.095623	0.0386877	-0.477134	0.0273361	-0.420961	0.10085	0.0644394	-0.0951666	-0.187752	0.0709836	0.122656	0.363318	0.309159	0.343508	-0.0153001	0.123047	-0.123047
XM_005174776	NO	blue	-0.128784	-0.415992	0.254872	0.319464	0.553942	0.946288	0.722719	0.084836	0.146028	-0.728095	0.109681	-0.383626	0.0907478	0.0213834	-0.357957	0.357772	-0.240236	-0.017913	0.239238	-0.492324	-0.527863	-0.108062	0.156987	0.413544	0.187767	0.529984	0.00394003	0.0355554	-0.0355554
XM_005174785	NO	blue	0.0154848	-0.244102	0.487581	0.39021	0.588538	0.912851	0.664374	0.08609	0.154028	-0.616532	0.0545428	-0.454472	0.108761	0.0949168	-0.583709	0.201886	-0.29488	0.0611791	0.115584	-0.527474	-0.455964	-0.173729	0.188978	0.317188	0.25434	0.604596	0.101415	0.0269694	-0.0269694
XM_020036820	NO	blue	-0.252975	-0.520819	0.291466	0.481432	0.614572	0.762047	0.622481	0.114477	0.280138	-0.453765	0.20921	-0.0927113	0.108709	0.171975	-0.423785	0.377068	-0.0820517	-0.188933	0.272553	-0.496709	-0.51813	-0.234088	0.110182	0.105741	-0.111719	0.378625	-0.0190653	0.148473	-0.148473
XM_011294432	NO	blue	0.076764	0.37184	-0.144951	-0.525735	-0.601933	-0.538956	-0.540117	-0.168678	-0.0665853	0.205106	-0.457802	-0.234718	0.376935	0.145504	0.18551	-0.390818	-0.077979	0.236666	0.0398637	0.608274	0.595363	0.275575	0.146446	0.0438428	0.0451396	-0.318538	0.604078	-0.106691	0.106691
XM_005174791	NO	blue	-0.109739	0.145162	-0.455544	-0.165647	-0.284204	-0.819514	-0.686105	-0.0252866	-0.0704355	0.612659	0.00176281	0.555083	-0.200505	-0.0529472	0.271569	-0.091082	0.246936	0.0977094	-0.136948	0.333329	0.399648	0.164428	-0.278636	-0.381782	-0.247499	-0.517432	-0.229434	0.0622358	-0.0622358
XM_020037670	NO	blue	0.0504921	0.0383693	0.132596	0.580699	0.412956	0.559165	0.271138	0.181308	0.179914	-0.4665	0.0173426	-0.210504	0.0742448	-0.121492	-0.551176	0.25451	-0.339982	0.0456149	0.0294991	-0.268066	-0.209441	0.012547	-0.377464	0.180416	0.168186	0.274137	-0.171527	0.0261992	-0.0261992
XM_020037643	NO	blue	-0.0581042	-0.405965	0.163523	0.0317246	0.56787	0.836757	0.54288	0.106314	-0.0399519	-0.695433	-0.0430512	-0.502759	-0.0362063	-0.183114	-0.330826	0.130559	-0.291578	0.0433956	0.237611	-0.33553	-0.359315	0.024477	0.443035	0.514548	0.28896	0.520077	-0.0472662	-0.111846	0.111846
XM_020037598	NO	blue	0.138516	-0.203598	0.129188	0.0442275	0.40087	0.467853	0.429656	0.463201	0.301019	-0.31932	0.262287	-0.00952168	-0.0725537	-0.30299	0.0476328	-0.16586	-0.364624	-0.154662	0.272004	-0.318207	-0.425954	-0.0875312	0.228268	0.246301	-0.0230179	0.405078	0.0261488	0.238735	-0.238735
XM_005174800	NO	blue	0.0552802	0.146044	-0.234733	-0.18169	-0.313369	-0.732778	-0.556551	-0.227541	-0.278535	0.601205	-0.0508169	0.363036	-0.0055575	-0.0509576	0.212539	-0.0422361	0.464796	0.0119856	-0.0384664	0.329189	0.384986	0.033615	0.0108128	-0.442191	-0.352056	-0.528531	-0.00124283	-0.213464	0.213464
XM_005174801	NO	blue	0.118063	0.345132	-0.0537222	-0.0202006	-0.0477738	-0.378977	-0.273744	0.201247	0.246209	0.389978	0.204793	0.458724	-0.0827624	-0.00271689	-0.127968	-0.192368	-0.109438	-0.026908	-0.25883	-0.152163	0.0540784	0.0337496	-0.252965	-0.167636	0.195388	0.159472	0.0842551	0.266966	-0.266966
XM_005174804	NO	blue	-0.135026	-0.42508	0.426833	0.389336	0.664111	0.946868	0.766135	0.084375	0.109764	-0.59356	0.168502	-0.340034	0.0413207	0.0425003	-0.443486	0.287795	-0.182633	-0.110996	0.121494	-0.547852	-0.589495	-0.247327	0.291747	0.288984	0.178712	0.569374	-0.0561073	0.0167924	-0.0167924
XM_005174814	NO	blue	0.0520195	-0.20902	0.349615	-0.00325567	0.229421	0.413734	0.233692	-0.376159	-0.391315	-0.302075	-0.237366	-0.50656	0.10647	0.103138	-0.154761	0.185573	0.121986	0.0428638	0.065091	-0.0662344	-0.0136877	-0.0612306	0.405226	0.16277	0.160677	0.179126	0.0113926	-0.309573	0.309573
XM_011296074	NO	blue	0.0881647	0.369221	-0.468971	-0.246205	-0.693481	-0.832809	-0.66272	-0.131245	-0.0927447	0.466302	-0.153573	0.327039	0.0408001	-0.022553	0.507796	-0.10848	0.229815	-0.117102	-0.0668655	0.549473	0.525359	0.240622	-0.421012	-0.256714	-0.211245	-0.572462	-0.0997821	0.038757	-0.038757
XM_020039161	NO	blue	-0.0354492	-0.317198	0.0816872	-0.224874	0.305761	0.441174	0.183824	0.0286252	0.100243	-0.471522	-0.20198	-0.397826	0.0879973	0.00146014	-0.166097	-0.023587	-0.20983	0.268557	0.417135	-0.307551	-0.0430684	0.196753	0.645615	0.451964	0.18356	0.514714	0.19504	0.0498478	-0.0498478
XM_005174881	NO	blue	0.0531341	-0.127682	0.522024	0.433228	0.498841	0.880931	0.742495	0.329499	0.254076	-0.481818	0.285324	-0.220979	-0.0882872	-0.115339	-0.513469	0.0253139	-0.399188	-0.109507	-0.0811157	-0.682697	-0.61812	-0.264893	0.192999	0.29917	0.382518	0.761693	-0.0385199	0.123825	-0.123825
XM_005174901	NO	blue	-0.313314	-0.306374	-0.133437	0.121084	0.651718	0.452907	0.171687	0.680149	0.637344	-0.407113	0.136693	0.111968	0.0646662	-0.241107	-0.324664	-0.00427465	-0.61897	0.0761228	0.227887	-0.372439	-0.279297	0.184039	-0.00422686	0.348144	0.137276	0.521188	-0.0907771	0.381411	-0.381411
XM_005174904	NO	blue	0.112085	0.331317	-0.283152	-0.274346	-0.523089	-0.860149	-0.553195	0.0279569	-0.0773912	0.694198	0.0516158	0.45272	-0.146587	-0.066058	0.477458	-0.382708	0.201955	-0.060471	-0.140834	0.49238	0.341492	0.00675824	-0.247756	-0.424001	-0.348358	-0.588675	0.0265799	0.034944	-0.034944
XM_011297917	NO	blue	0.167372	-0.0739073	-0.276434	-0.25576	-0.221569	-0.298316	-0.16011	-0.0805151	-0.13004	0.164958	0.0549535	0.136733	-0.218173	0.00702605	0.428604	-0.144696	0.220052	-0.157701	0.192072	0.230026	0.0868972	0.0441524	-0.0398905	-0.0891888	-0.279618	-0.29495	-0.181933	0.0926805	-0.0926805
XM_020039930	NO	blue	0.260283	0.343064	0.476663	0.42876	0.245631	0.304845	0.286409	0.382242	0.122247	0.0457777	0.217229	-0.0461141	-0.0943518	-0.162594	-0.481145	-0.373629	-0.356805	0.0808698	-0.500342	-0.141106	-0.271997	-0.307823	0.0287794	-0.0952333	0.301207	0.324916	-0.0711718	0.0576151	-0.0576151
XR_002195553	NO	blue	-0.207328	-0.0164481	0.132718	0.40587	0.230408	0.372919	0.202051	0.202104	0.304202	-0.287257	0.0794308	0.066443	0.158767	-0.0656875	-0.359897	0.347934	-0.211051	0.114292	0.0771887	-0.399466	-0.17133	0.0275314	-0.21105	0.11753	0.0766443	0.349939	0.141037	0.0772935	-0.0772935
XM_011297935	NO	blue	-0.203398	0.0911172	-0.0112816	-0.0574427	-0.374139	-0.31703	-0.155921	-0.297046	-0.204083	0.320597	-0.065427	0.0290616	0.0052569	0.273456	0.120732	-0.0402328	0.351868	-0.31749	-0.273121	0.395915	0.157844	-0.116113	0.0772686	-0.228888	-0.0402736	-0.312998	-0.167669	0.0131358	-0.0131358
XR_002195555	NO	blue	0.128252	0.116557	0.0675094	-0.117598	-0.652056	-0.634108	-0.211566	-0.605032	-0.557249	0.619676	0.0257089	0.212113	-0.00889114	0.221995	0.608771	0.15616	0.803111	-0.199717	-0.136002	0.404349	0.228964	-0.270212	-0.139764	-0.577728	-0.480832	-0.687279	0.0217944	-0.43509	0.43509
XM_005174910	NO	blue	0.170851	0.0817795	0.12405	0.165339	0.497248	0.482709	0.190617	0.5706	0.163051	-0.358672	0.0150817	-0.197212	-0.144384	-0.544416	-0.42533	-0.309463	-0.610136	0.208969	-0.103351	-0.241264	-0.181774	0.0827543	0.241152	0.331753	0.374338	0.508008	-0.18768	0.0462208	-0.0462208
XM_005174916	NO	blue	-0.000812896	0.00167305	-0.14063	-0.427349	-0.466138	-0.81054	-0.434709	-0.312005	-0.323643	0.703395	-0.0171092	0.30822	-0.00985246	0.0846379	0.572599	-0.161635	0.569351	-0.0897974	-0.0126838	0.466487	0.320047	-0.114124	0.0475292	-0.496491	-0.510559	-0.699397	0.149536	-0.288496	0.288496
XM_020040006	NO	blue	0.0497074	-0.145973	0.310742	0.387079	0.663125	0.903311	0.598168	0.447386	0.35	-0.63671	0.17881	-0.253632	-0.0304574	-0.201393	-0.636344	0.0460321	-0.574261	0.0807169	0.0492207	-0.613811	-0.507278	-0.0489866	0.157069	0.43665	0.432517	0.791841	-0.0145481	0.17717	-0.17717
XM_020040008	NO	blue	-0.107965	-0.156069	0.0898611	0.182089	0.255475	0.810482	0.42686	0.0194593	0.0418998	-0.821612	-0.190673	-0.579239	-0.0998713	-0.0124211	-0.256975	0.207545	-0.423443	0.074744	0.205813	-0.261578	-0.190325	0.198678	0.103116	0.642585	0.445175	0.581444	-0.176461	0.100467	-0.100467
XR_002195571	NO	blue	-0.0544719	-0.207872	0.275174	0.126801	0.363776	0.512386	0.479379	-0.0907353	0.0566675	-0.245673	0.155222	-0.189409	0.0208614	0.370419	-0.292135	0.0705547	0.0127693	-0.224577	-0.143455	-0.300474	-0.395059	-0.240686	0.249469	0.111332	0.233043	0.285723	-0.0677483	0.147835	-0.147835
XM_020040040	NO	blue	-0.165048	-0.306507	0.113074	0.031471	0.234686	0.77093	0.542139	-0.101725	-0.0352312	-0.75543	-0.131883	-0.587418	-0.0280354	0.0491472	-0.100344	0.261735	-0.153742	-0.115652	0.334182	-0.167476	-0.268325	0.0709752	0.324164	0.552321	0.202026	0.421237	-0.014961	-0.0373536	0.0373536
XM_005174931	NO	blue	0.0775272	-0.244233	0.430122	0.414478	0.647468	0.898363	0.760445	0.449454	0.349919	-0.517507	0.310485	-0.182638	-0.061748	-0.136797	-0.462033	-0.014449	-0.426766	-0.176915	0.0514605	-0.60014	-0.650803	-0.25861	0.211071	0.276922	0.214586	0.695715	-0.0728688	0.21488	-0.21488
XR_002195579	NO	blue	0.0396067	-0.0409066	0.223197	0.0286138	0.321239	0.493896	0.35946	0.15725	0.269193	-0.301946	0.0760156	-0.244857	0.00806114	0.235796	-0.490644	-0.263244	-0.300427	-0.192927	-0.0645878	-0.271994	-0.288176	-0.0702237	0.46045	0.30296	0.434507	0.564065	0.0720797	0.387538	-0.387538
XM_005174943	NO	blue	-0.0784921	-0.394595	0.417315	0.331429	0.766782	0.934571	0.714195	0.231946	0.181203	-0.568765	0.190999	-0.297751	0.0250312	-0.0474921	-0.531385	0.152932	-0.296041	-0.0997783	0.0866507	-0.561783	-0.584321	-0.21139	0.371164	0.316198	0.259852	0.665387	-0.0550706	0.0646465	-0.0646465
XM_005174949	NO	blue	-0.308854	-0.560147	0.30666	-0.147512	0.335915	0.331803	0.363308	-0.155469	0.0211584	-0.131709	0.0237457	-0.197132	0.394126	0.304001	-0.00121121	0.143348	0.196995	0.0181878	0.414859	-0.0402378	-0.237266	-0.237096	0.614022	-0.00995024	-0.345919	0.0559548	0.537914	-0.149639	0.149639
XM_005174950	NO	blue	0.209972	0.343263	0.306451	0.148306	0.0959377	0.431371	0.213944	0.386288	0.160464	-0.321429	-0.044849	-0.346623	-0.182994	-0.245449	-0.37205	-0.396552	-0.550268	-0.0782998	-0.140508	-0.110019	-0.101663	0.0415704	0.166728	0.350076	0.456924	0.587119	-0.0732531	0.0660844	-0.0660844
XM_011298151	NO	blue	0.122073	-0.0320429	0.369691	0.590541	0.601847	0.796801	0.5804	0.331389	0.139468	-0.466225	0.28467	-0.124674	-0.343854	-0.302763	-0.542538	0.104834	-0.398673	-0.00758662	-0.02712	-0.663157	-0.53897	-0.161607	-0.0227155	0.26115	0.305263	0.68406	-0.290355	0.172106	-0.172106
XM_005174957	NO	blue	0.0983783	-0.184889	0.359468	0.251425	0.300983	0.762721	0.727298	0.125714	0.183265	-0.519124	0.203213	-0.341242	0.129043	0.0711542	-0.160658	0.0863795	-0.199155	-0.283623	0.114817	-0.270418	-0.528217	-0.242851	0.196942	0.279566	0.152523	0.454042	0.0497576	0.0903466	-0.0903466
XM_011298202	NO	blue	-0.0052067	-0.116174	-0.0747104	-0.151077	-0.117082	-0.321012	-0.221797	-0.371184	-0.32195	0.271709	-0.0625825	0.106487	-0.0912247	0.150322	0.328498	0.0611042	0.402159	-0.0611498	-0.0577578	0.151821	0.164602	-0.0370904	0.111563	-0.216118	-0.155618	-0.369358	-0.207002	-0.0818484	0.0818484
XM_005174969	NO	blue	0.18162	0.403512	-0.0690853	0.0381086	-0.273848	-0.43635	-0.125373	0.238164	0.0687983	0.487569	0.26133	0.379434	-0.105156	-0.134953	0.208964	-0.403325	0.0401758	-0.272371	-0.410681	0.312212	-0.0256255	-0.21101	-0.19551	-0.353303	-0.122305	-0.351367	-0.0820156	0.114359	-0.114359
XR_002194018	NO	blue	0.190772	0.125662	-0.0462053	-0.0692239	-0.30109	-0.365643	-0.12595	-0.169806	-0.127695	0.381176	0.16049	0.236619	-0.231048	0.188187	0.237356	-0.160607	0.33797	-0.198907	-0.118115	0.189964	0.0464408	-0.132545	0.0269763	-0.278841	-0.136725	-0.208072	-0.152691	0.119265	-0.119265
XM_020034655	NO	blue	0.0840151	-0.0731119	-0.142171	-0.483782	-0.372626	-0.691149	-0.38478	-0.271711	-0.333658	0.556288	-0.0629519	0.199865	-0.104464	0.0482186	0.687928	-0.225026	0.436643	0.0344523	0.0979764	0.438172	0.302525	-0.0522999	0.0997627	-0.362833	-0.482031	-0.603827	0.0831292	-0.168421	0.168421
XM_005174991	NO	blue	0.458006	0.203409	0.0599961	-0.0799759	-0.438084	-0.327255	-0.0588773	-0.0367558	-0.134402	0.346914	0.14236	0.144607	-0.20145	0.0200954	0.364308	-0.316643	0.207426	0.0669798	-0.194975	0.129064	0.0462422	-0.175662	-0.0113076	-0.275635	-0.137013	-0.268949	-0.0781318	-0.078426	0.078426
XM_005175012	NO	blue	0.339651	0.631345	0.0192907	-0.15133	-0.558069	-0.508398	-0.277772	-0.183108	-0.236589	0.451751	-0.0371999	0.000158898	-0.0321921	0.0884362	0.0829858	-0.433207	0.115678	-0.135185	-0.582423	0.449612	0.242852	-0.0932443	-0.0986717	-0.216706	0.269642	-0.317083	0.0154497	-0.0255022	0.0255022
XM_005175029	NO	blue	-0.349991	-0.352604	-0.0348808	-0.00330118	0.442195	0.345672	-0.0141105	-0.029106	-0.0818544	-0.348473	-0.264091	-0.311349	-0.039612	0.0328761	-0.325178	0.10811	-0.135171	0.220383	0.258938	0.0481679	0.0760888	0.178006	0.390671	0.244825	0.0176518	0.1148	-0.0544673	-0.155394	0.155394
XM_020034885	NO	blue	-0.0488907	-0.073721	-0.116219	0.133079	0.429555	0.64843	0.269254	0.188377	-0.00397254	-0.682226	-0.111282	-0.431014	-0.297577	-0.24516	-0.297069	0.0272	-0.475824	-0.0288443	0.0598201	-0.121436	-0.182129	0.227374	0.0111017	0.575281	0.443374	0.40679	-0.429755	0.124374	-0.124374
XM_005175045	NO	blue	-0.196688	-0.346189	0.37652	0.541976	0.539318	0.828735	0.761741	0.045324	0.226601	-0.456165	0.330248	-0.116598	0.214418	0.206335	-0.49842	0.471108	-0.0402074	-0.323419	0.0382758	-0.485844	-0.647626	-0.342944	-0.0577869	0.101899	0.0824095	0.405421	0.0323593	0.0796063	-0.0796063
XM_011292079	NO	blue	-0.0497983	-0.253489	0.349182	0.441873	0.613778	0.8043	0.679944	0.402588	0.400878	-0.428256	0.364689	0.00582184	0.0524923	-0.057499	-0.47761	0.136726	-0.329704	-0.0576188	-0.0265157	-0.685619	-0.629258	-0.227037	0.241396	0.217847	0.276321	0.726174	-0.0446528	0.204554	-0.204554
XM_011292072	NO	blue	0.1921	-0.0181219	0.486028	0.235974	0.282843	0.54059	0.45128	0.299411	0.325558	-0.266932	0.149464	-0.235775	0.209502	0.0696332	-0.451735	-0.213999	-0.414694	-0.00529854	0.0261586	-0.241175	-0.343783	-0.229624	0.147113	0.132983	0.174091	0.413942	0.396652	0.133873	-0.133873
XM_011292156	NO	blue	-0.37693	-0.628965	0.0703304	0.271696	0.638822	0.749669	0.602625	0.0180504	0.0778509	-0.565384	0.186908	-0.131363	0.0484155	-0.0534943	-0.194826	0.582805	0.0480422	-0.0774103	0.43754	-0.463011	-0.509776	-0.101184	0.159321	0.249784	-0.1633	0.324603	-0.0601376	-0.079372	0.079372
XM_005175097	NO	blue	0.124595	0.315156	-0.429095	-0.532027	-0.589457	-0.727262	-0.767914	0.00557952	-0.035049	0.286018	-0.422271	0.0584466	-0.0912019	-0.0707056	0.40397	-0.430935	-0.131875	0.302345	0.0600212	0.453285	0.696546	0.469724	-0.0265694	0.0467615	0.0252361	-0.270392	0.0699436	0.0713518	-0.0713518
XM_020035142	NO	blue	0.150433	0.150012	-0.322274	-0.333704	-0.368353	-0.453702	-0.296098	-0.196828	-0.246814	0.215024	-0.0215024	0.202067	-0.284184	-0.0903109	0.614396	0.00827248	0.313101	-0.215754	0.0199909	0.123791	0.212707	0.156246	-0.183878	-0.0549458	-0.131006	-0.277153	-0.299796	0.02885	-0.02885
XM_005175105	NO	blue	-0.297394	-0.142062	-0.438358	-0.491406	-0.525737	-0.553087	-0.524967	-0.543882	-0.242999	0.10588	-0.457672	-0.0995932	0.342691	0.34424	0.578119	0.294949	0.44831	-0.0800378	0.482315	0.642378	0.582945	0.32901	-0.118111	-0.057556	-0.476749	-0.62424	0.242699	-0.195855	0.195855
XM_020035197	NO	blue	0.0623517	-0.177838	0.431635	0.620948	0.680414	0.63779	0.663095	0.313278	0.261697	-0.172382	0.459562	0.127527	0.0262964	-0.0416247	-0.4296	0.156086	-0.12629	-0.0958517	-0.242933	-0.632804	-0.669781	-0.451332	-0.0727855	-0.123451	0.0343979	0.336918	-0.185005	0.100782	-0.100782
XM_011292342	NO	blue	0.271541	0.179844	0.5347	0.265818	0.19159	0.517104	0.355634	-0.0387392	-0.290305	-0.252592	-0.0338584	-0.432195	-0.428691	-0.149852	-0.374029	-0.166989	-0.223275	0.0841522	-0.260543	-0.305788	-0.184121	-0.151909	0.224057	0.212014	0.461833	0.520183	-0.226677	-0.113933	0.113933
XM_005175115	NO	blue	0.0288988	-0.0988665	0.0714603	0.213341	0.286711	0.431389	0.156179	0.0791115	0.163459	-0.369772	-0.0311309	-0.146396	-0.189986	0.137162	-0.31235	0.0645474	-0.295936	0.104987	0.0601518	-0.37624	-0.119281	0.134165	0.0455241	0.301993	0.365656	0.565881	-0.311097	0.431498	-0.431498
XM_020035283	NO	blue	-0.023891	-0.108416	0.422425	0.337811	0.609621	0.792663	0.684104	0.3288	0.263471	-0.417961	0.332885	-0.163428	-0.116601	-0.0481178	-0.428774	-0.024434	-0.402507	-0.0590287	-0.106892	-0.549866	-0.63114	-0.254446	0.180663	0.28341	0.362536	0.681366	-0.0378243	0.201046	-0.201046
XM_005175138	NO	blue	0.00363551	0.390335	-0.428947	-0.492158	-0.687115	-0.905305	-0.739648	-0.253339	-0.28698	0.512065	-0.308145	0.121231	0.0238479	0.0100382	0.5585	-0.250142	0.269457	0.0463056	-0.110836	0.785266	0.64339	0.25018	-0.12673	-0.226493	-0.202905	-0.705781	0.0529409	-0.18311	0.18311
XM_005175140	NO	blue	-0.10621	-0.0115486	-0.186103	-0.197168	-0.19871	-0.707112	-0.3866	0.0714732	0.032047	0.728668	0.231005	0.611671	-0.0152303	0.0220837	0.331845	-0.233532	0.290611	-0.102923	-0.140284	0.294903	0.1194	-0.142342	0.00568789	-0.508292	-0.372076	-0.458306	0.0202066	0.0431365	-0.0431365
XM_005175150	NO	blue	0.0649244	0.290301	-0.441845	-0.702149	-0.641014	-0.644445	-0.52186	-0.15942	-0.0250042	0.204974	-0.275924	0.0325199	0.159047	0.077881	0.584216	-0.250438	0.0847721	0.00829489	0.122434	0.404258	0.482984	0.362508	0.0185682	0.111737	-0.00472039	-0.302683	0.321643	0.0413427	-0.0413427
XM_011292528	NO	blue	-0.177562	-0.10697	-0.549461	-0.547703	-0.427506	-0.538788	-0.499746	-0.283855	-0.201855	0.0850484	-0.346477	-0.0485929	0.274813	0.017076	0.623758	0.0960583	0.287403	0.0796813	0.323274	0.66517	0.485106	0.330122	-0.0172973	0.00770258	-0.367339	-0.687367	0.147409	-0.185697	0.185697
XM_005175162	NO	blue	-0.0584765	-0.249031	0.0362852	0.0438797	0.146898	0.723679	0.516911	-0.0782305	0.0451782	-0.75934	-0.126695	-0.540579	0.159703	0.0954977	-0.0603676	0.28902	-0.213266	0.0192566	0.237187	-0.177184	-0.250455	0.0927403	0.108167	0.532485	0.264355	0.335215	0.0521304	0.0112985	-0.0112985
XM_011292581	NO	blue	0.133931	0.0982654	0.0846698	0.0935814	0.111381	0.647331	0.313818	0.10695	0.0640298	-0.670517	-0.136583	-0.466668	-0.315613	-0.125423	-0.363875	-0.0185409	-0.503199	0.227987	0.0515685	-0.454426	-0.136595	0.254334	0.137302	0.660079	0.676031	0.77935	-0.132197	0.220418	-0.220418
XM_011292576	NO	blue	-0.357538	-0.562191	-0.0631059	-0.0875667	0.478667	0.529143	0.305249	-0.0225855	-0.0036462	-0.503039	-0.121527	-0.29718	0.0456022	-0.0602603	-0.211904	0.297703	-0.0821554	0.0707007	0.271352	-0.295595	-0.189065	0.117723	0.395719	0.386781	0.142745	0.313051	-0.0598579	-0.134499	0.134499
XR_002194196	NO	blue	0.233245	0.0861531	0.452215	0.257889	0.324159	0.742082	0.676745	0.220677	0.106248	-0.393587	0.271652	-0.241704	-0.238926	-0.0671516	-0.439993	-0.131983	-0.340238	-0.163128	-0.257675	-0.585172	-0.549845	-0.23406	0.241193	0.329247	0.570876	0.763154	-0.0668942	0.19617	-0.19617
XM_005175174	NO	blue	-0.0354323	-0.0503375	0.173198	-0.0467838	0.158731	0.497902	0.416282	-0.0206649	0.179968	-0.377026	0.101902	-0.191194	-0.0891274	0.285693	-0.16564	-0.00232896	-0.217799	0.0110733	0.00627554	-0.440046	-0.31124	0.010479	0.368605	0.418334	0.511253	0.710451	0.108046	0.397214	-0.397214
XM_005175177	NO	blue	-0.0638402	-0.065502	-0.323973	-0.213521	-0.169195	-0.732367	-0.522122	-0.314699	-0.448099	0.600121	-0.0316614	0.400553	-0.283389	-0.12329	0.392668	0.0921985	0.580348	0.136333	-0.0660236	0.236848	0.329537	0.0208205	-0.0970704	-0.460337	-0.432369	-0.653518	-0.27855	-0.303128	0.303128
XM_011292643	NO	blue	-0.260477	-0.247397	-0.298028	-0.0192793	-0.0158406	-0.292723	-0.132421	0.124832	-0.0284785	0.254717	0.188777	0.404213	-0.227247	-0.219267	0.532083	0.0548939	0.148841	-0.0855191	0.12644	0.148429	-0.0497475	-0.0454451	-0.188436	-0.222708	-0.479855	-0.434539	-0.339956	-0.00913549	0.00913549
XM_005175223	NO	blue	-0.048489	-0.355221	0.499871	0.682844	0.771804	0.805907	0.789374	0.341331	0.383414	-0.258844	0.527714	0.124325	0.13069	0.0540593	-0.608908	0.248038	-0.169452	-0.185523	-0.151341	-0.721308	-0.789099	-0.48778	0.0177032	-0.0685024	0.0955363	0.521046	-0.110834	0.209133	-0.209133
XM_005175226	NO	blue	0.180409	0.405993	-0.148595	-0.00311909	-0.601314	-0.835881	-0.468551	-0.195771	-0.123984	0.751479	0.141333	0.518767	0.0653686	0.15074	0.346708	-0.0768279	0.425598	-0.23943	-0.283041	0.459299	0.284319	-0.1354	-0.501363	-0.604904	-0.32372	-0.629089	0.015539	0.0196723	-0.0196723
XM_011292843	NO	blue	0.174803	0.382604	-0.494577	-0.286876	-0.54555	-0.770444	-0.754664	-0.194424	-0.390733	0.322821	-0.36915	0.03896	-0.0473976	-0.280706	0.439172	-0.0902456	0.181505	0.151704	-0.012926	0.745888	0.672672	0.341058	-0.393191	-0.18013	-0.248501	-0.764572	-0.124979	-0.352442	0.352442
XM_005175227	NO	blue	0.0757067	0.346215	-0.262428	-0.529367	-0.763862	-0.824234	-0.667634	-0.521902	-0.472862	0.454114	-0.400399	-0.05849	0.00598665	0.130689	0.476039	-0.145653	0.402923	0.255629	-0.0308209	0.642985	0.672754	0.223395	-0.00470317	-0.188543	-0.158795	-0.629946	0.275909	-0.295614	0.295614
XM_020035705	NO	blue	-0.206242	-0.383197	0.0415585	0.354696	0.592949	0.483572	0.214886	0.120267	-0.00627112	-0.361506	0.0185954	-0.111607	-0.0308299	-0.192936	-0.363789	0.355674	-0.100907	0.057477	0.24951	-0.205859	-0.211158	-0.0155596	-0.089521	0.0832456	-0.174092	0.0552317	-0.204237	-0.0852218	0.0852218
XM_005175238	NO	blue	-0.15724	0.0638362	-0.0475288	-0.136722	-0.530664	-0.67589	-0.406561	-0.332254	-0.0404693	0.601544	-0.0416006	0.372521	0.176362	0.453345	0.305841	0.0633153	0.488759	-0.035824	-0.0103943	0.2888	0.335216	-0.0702105	-0.0980557	-0.484812	-0.398764	-0.432442	0.259571	0.0355144	-0.0355144
XM_020035736	NO	blue	0.341836	0.148838	0.588585	0.174247	0.0631276	0.311129	0.258914	-0.0338624	0.131536	-0.114607	-0.0783917	-0.363015	0.21787	0.383424	-0.305419	-0.22279	-0.164378	-0.0215657	-0.0555381	-0.0635941	-0.0614007	-0.21695	0.113808	-0.0265921	0.110151	0.258005	0.32979	0.0198059	-0.0198059
XM_011292968	NO	blue	0.357299	0.483026	0.223923	0.534554	0.241444	0.332824	0.241495	0.384012	0.148817	-0.11269	0.291433	0.0637558	-0.442374	-0.277547	-0.458803	-0.205466	-0.480208	-0.103786	-0.531766	-0.358773	-0.313975	-0.112	-0.419933	0.100421	0.569924	0.4757	-0.465912	0.261958	-0.261958
XM_005175257	NO	blue	0.337509	-0.162123	0.540162	0.513519	0.460896	0.701137	0.733686	0.140354	0.147316	-0.28421	0.368525	-0.134404	-0.0792935	0.117687	-0.302323	0.0636911	-0.144537	0.0405002	-0.134803	-0.555504	-0.616115	-0.434582	-0.0357377	-0.0140008	0.112546	0.40028	-0.114174	0.134724	-0.134724
XM_005175261	NO	blue	-0.155825	-0.488055	0.344734	0.0627946	0.458119	0.656046	0.594092	0.0247861	0.322916	-0.398011	0.0847176	-0.247186	0.477593	0.446226	-0.221449	0.13971	-0.0896665	-0.277168	0.158621	-0.311713	-0.426299	-0.229477	0.396302	0.174255	0.0732215	0.397136	0.234186	0.281658	-0.281658
XM_011293052	NO	blue	-0.159259	-0.270229	0.381137	0.284369	0.439047	0.585985	0.566039	-0.00180533	0.101955	-0.265166	0.190267	-0.162863	0.0247124	0.127775	-0.365824	0.173985	-0.0651891	-0.138824	-0.102982	-0.495586	-0.47272	-0.280437	0.176135	0.116307	0.217631	0.407115	-0.038272	0.029851	-0.029851
XM_005175272	NO	blue	-0.0706741	0.0246899	-0.0927619	-0.0758106	0.244494	0.404622	0.345425	0.565233	0.497214	-0.357198	0.252783	-0.0198448	0.00317945	-0.213491	-0.145192	-0.26287	-0.571518	-0.141128	-0.00297007	-0.194238	-0.390581	0.0604843	0.131485	0.439946	0.389324	0.510552	0.082915	0.35598	-0.35598
XM_005175275	NO	blue	0.263217	0.275072	-0.0462281	-0.212479	-0.615859	-0.808028	-0.463869	-0.31007	-0.378847	0.687125	-0.0164497	0.31309	-0.13128	-0.0371119	0.564037	-0.144951	0.464216	0.155114	-0.0837412	0.357589	0.375341	-0.0772732	-0.14851	-0.49286	-0.387242	-0.559327	0.105317	-0.24643	0.24643
XM_011293113	NO	blue	0.159809	-0.172651	0.562929	0.348561	0.660897	0.854689	0.758216	0.376117	0.234597	-0.411092	0.288351	-0.255259	0.100264	-0.12206	-0.551453	-0.0820136	-0.353051	-0.0956074	-0.0953096	-0.521394	-0.62662	-0.352662	0.35298	0.188095	0.264883	0.639074	0.0947677	0.0433723	-0.0433723
XM_005175292	NO	blue	-0.149726	-0.0797439	-0.231644	-0.409388	-0.541465	-0.54969	-0.501759	-0.647983	-0.481801	0.220033	-0.47115	-0.225876	0.179727	0.296465	0.405011	0.158816	0.473481	0.195322	0.337622	0.689936	0.590953	0.193137	0.0244519	-0.159826	-0.419279	-0.670467	0.307047	-0.387359	0.387359
XM_005175285	NO	blue	-0.112939	-0.291174	0.219359	0.238027	0.653882	0.938604	0.59684	0.252729	0.187184	-0.770399	0.0182058	-0.455056	-0.0392145	-0.133859	-0.420539	0.129784	-0.490961	0.0871059	0.202146	-0.439403	-0.43649	0.0261566	0.259528	0.553306	0.349305	0.660076	-0.0643632	0.106113	-0.106113
XM_005175300	NO	blue	0.167169	0.323904	-0.295882	-0.72381	-0.707012	-0.602827	-0.511017	-0.180346	-0.241412	0.224624	-0.359852	-0.116364	-0.0372468	-0.0114709	0.638996	-0.434643	0.0490712	0.161462	0.028884	0.511771	0.54007	0.321438	0.263978	0.122294	0.0586457	-0.268857	0.226721	-0.0605028	0.0605028
XM_005175314	NO	blue	0.144229	-0.269485	0.717929	0.39438	0.425337	0.631087	0.708435	-0.0466645	-0.056852	-0.134789	0.251943	-0.234779	-0.0268928	0.215187	-0.292064	0.0130086	0.074206	-0.190886	-0.0939382	-0.350627	-0.526863	-0.551349	0.273898	-0.135113	-0.0613754	0.276028	0.0228613	-0.0449154	0.0449154
XM_011293242	NO	blue	-0.12299	-0.172932	0.208519	0.436329	0.546896	0.821098	0.614809	0.345922	0.347047	-0.608996	0.207193	-0.192966	0.0867229	-0.128387	-0.440988	0.244244	-0.417442	-0.097041	0.150666	-0.437661	-0.520511	-0.0852171	-0.0377335	0.350537	0.199719	0.575293	0.0060995	0.153318	-0.153318
XM_005175320	NO	blue	0.159777	0.344588	-0.211658	-0.271261	-0.616407	-0.882371	-0.60738	-0.0784045	-0.0918184	0.69196	-0.082339	0.360257	-0.00492335	0.0606308	0.41207	-0.331386	0.278552	-0.118483	-0.148752	0.519609	0.467927	0.033392	-0.216799	-0.454873	-0.325721	-0.566173	0.035118	-0.00481741	0.00481741
XM_005175325	NO	blue	0.082749	-0.0261482	0.131482	0.247315	0.50742	0.642643	0.399474	0.606737	0.483221	-0.429883	0.243925	-0.0144222	-0.13447	-0.267235	-0.579653	-0.20376	-0.668148	0.0726779	-0.0618174	-0.6438	-0.434529	0.0418775	0.204622	0.430926	0.566113	0.871999	-0.105137	0.482625	-0.482625
XM_005175327	NO	blue	-0.0924214	-0.32779	0.309033	0.289097	0.580176	0.954557	0.688894	0.281722	0.286367	-0.704369	0.101996	-0.389515	0.091683	-0.0118056	-0.42455	0.10981	-0.441827	-0.104234	0.131126	-0.456225	-0.514647	-0.0911618	0.277724	0.463146	0.334778	0.678192	-0.0603569	0.181743	-0.181743
XR_891478	NO	blue	-0.305545	-0.0378538	-0.418802	-0.419572	-0.390061	-0.566611	-0.337218	-0.328813	-0.31301	0.373947	-0.0287282	0.249053	-0.198565	0.064729	0.567159	0.033914	0.438945	-0.120947	-0.046604	0.319452	0.211257	0.0850659	0.0628862	-0.135234	-0.185027	-0.477285	-0.157497	-0.0937244	0.0937244
XM_020036127	NO	blue	-0.267119	-0.342052	0.221509	0.297418	0.33199	0.649605	0.41438	-0.336084	-0.263204	-0.54937	-0.145868	-0.434945	0.0113802	0.0433705	-0.344615	0.631984	0.148063	0.224886	0.267381	-0.343009	-0.182121	-0.0204527	0.101905	0.240387	0.000139083	0.227891	0.057473	-0.353182	0.353182
XM_005175339	NO	blue	0.226656	0.361454	-0.215139	0.0427859	-0.222634	-0.784858	-0.541265	0.112471	-0.0947993	0.732558	0.196558	0.631979	-0.178875	-0.297204	0.190401	-0.176817	0.21793	0.101312	-0.320516	0.158191	0.232297	-0.0507514	-0.434513	-0.548617	-0.26413	-0.49778	-0.200928	-0.0370618	0.0370618
XM_020036132	NO	blue	-0.24577	0.0916468	-0.334603	-0.466199	-0.36915	-0.43368	-0.478004	-0.130503	0.146612	0.0897663	-0.311839	-0.0113671	0.303756	0.273569	0.177373	-0.133026	-0.0171974	0.0683635	0.324762	0.45777	0.449092	0.341507	0.15499	0.107447	-0.10546	-0.218285	0.560631	0.134772	-0.134772
XM_005175341	NO	blue	0.0836534	-0.252829	0.608161	0.620451	0.636417	0.923464	0.896193	0.298129	0.339686	-0.399054	0.463826	-0.0779752	0.104535	0.0739879	-0.551419	0.187973	-0.225569	-0.223435	-0.103875	-0.702877	-0.786584	-0.47284	0.063198	0.0675398	0.182105	0.641843	-0.0146207	0.187129	-0.187129
XM_005175354	NO	blue	-0.135335	0.117392	-0.281151	0.0616908	-0.340631	-0.772341	-0.486068	-0.0929963	-0.00632288	0.672768	0.157379	0.655804	-0.0424757	0.098077	0.412637	0.0960621	0.39072	-0.127971	-0.153057	0.308322	0.236743	-0.062636	-0.550895	-0.578227	-0.466788	-0.65071	-0.175114	0.0179769	-0.0179769
XM_005175356	NO	blue	0.0890575	0.354049	-0.477068	-0.0300532	-0.456272	-0.749597	-0.65901	-0.167428	-0.231759	0.456022	-0.0865536	0.384791	-0.180361	-0.117068	0.270404	0.070359	0.295518	-0.0293688	-0.201268	0.40059	0.458215	0.209332	-0.569927	-0.326855	-0.173495	-0.619869	-0.356765	-0.0799576	0.0799576
XM_005175358	NO	blue	-0.391441	-0.462348	-0.0588641	0.117758	0.410513	0.370712	0.130882	-0.072483	-0.139797	-0.351754	-0.151228	-0.206281	-0.0493845	-0.138037	-0.19266	0.32864	0.0594309	-0.1557	0.432042	-0.021083	-0.0565967	0.0792174	0.259804	0.16736	-0.24077	0.0246496	-0.12183	-0.174202	0.174202
XM_005175362	NO	blue	-0.157852	-0.356605	0.102953	0.136096	0.513106	0.926544	0.52168	0.11309	0.10669	-0.867263	-0.140315	-0.5729	0.0106878	-0.0816919	-0.424524	0.227978	-0.410485	0.0363003	0.287672	-0.377635	-0.302368	0.153634	0.302297	0.649319	0.392036	0.632357	-0.0884122	0.0412843	-0.0412843
XM_005175363	NO	blue	-0.106434	-0.0909806	-0.428312	-0.358651	-0.150772	-0.698429	-0.573635	-0.0361707	-0.101533	0.47045	-0.0756442	0.399741	-0.113891	-0.120698	0.462331	-0.103922	0.251486	0.299614	0.0439182	0.244606	0.364288	0.185089	0.052896	-0.262367	-0.316678	-0.469563	-0.137515	-0.0854252	0.0854252
XR_002194448	NO	blue	0.217046	0.0709328	0.314721	0.0191092	0.267532	0.700273	0.568837	0.237775	0.159607	-0.554322	0.0603652	-0.431367	-0.0469681	-0.116187	-0.274036	-0.147284	-0.445352	0.00636713	0.0220683	-0.409404	-0.378124	-0.0388883	0.254297	0.491032	0.454332	0.680438	0.193283	0.114424	-0.114424
XM_011293496	NO	blue	0.0507024	-0.136712	0.358015	0.499841	0.527811	0.713368	0.501811	0.154998	-0.022588	-0.42684	0.0956061	-0.320834	-0.112845	-0.13278	-0.432103	0.0834164	-0.277268	-0.0274521	-0.03565	-0.232888	-0.388436	-0.205752	0.00331231	0.15459	0.130924	0.314292	-0.269428	0.0637956	-0.0637956
XM_020036342	NO	blue	0.191137	0.247582	-0.258836	-0.306574	-0.429182	-0.644155	-0.526122	-0.252583	-0.609614	0.392747	-0.20431	0.0383012	-0.379401	-0.428223	0.530071	-0.177069	0.349629	0.119522	0.0352028	0.506053	0.455381	0.135659	-0.00406007	-0.209199	-0.337104	-0.620256	-0.199776	-0.466045	0.466045
XM_005175395	NO	blue	0.251654	0.30068	-0.354244	-0.0671104	-0.000645843	-0.39737	-0.472962	0.459558	0.258086	0.213879	0.039187	0.33093	-0.116806	-0.327251	7.66819e-05	-0.384729	-0.331541	0.068941	-0.0159675	0.217282	0.23125	0.251118	-0.253684	-0.056589	-0.00953509	-0.0990069	-0.14864	0.259142	-0.259142
XM_005175403	NO	blue	0.327245	0.259261	0.129851	-0.289254	-0.344686	-0.28943	-0.045362	-0.204751	-0.297422	0.297518	-0.0475665	-0.144734	0.022901	0.13074	0.332889	-0.394695	0.171283	0.0569827	-0.267881	0.431713	0.121038	-0.170886	0.237458	-0.17175	0.00990456	-0.269338	0.157255	-0.156701	0.156701
XM_011293656	NO	blue	0.234687	0.154527	0.094017	0.0565076	0.142231	0.426477	0.340268	0.524233	0.631901	-0.345571	0.162804	-0.0802684	0.0550516	0.143839	-0.193729	-0.420954	-0.624849	-0.24265	-0.0808735	-0.26135	-0.30505	0.0191498	0.0692168	0.35784	0.438671	0.606023	0.00163561	0.700854	-0.700854
XM_011293669	NO	blue	-0.0298891	0.266132	-0.630022	-0.58605	-0.636627	-0.719063	-0.670715	-0.30693	-0.271431	0.160394	-0.403632	-0.0191941	0.0365598	-0.0703904	0.63016	-0.0046352	0.210785	0.085171	0.168593	0.63731	0.634557	0.466617	-0.209063	0.0684757	-0.145591	-0.589708	0.0767036	-0.219654	0.219654
XM_020036445	NO	blue	0.130439	-0.188333	0.484985	0.335153	0.345893	0.896866	0.742656	0.138031	0.185189	-0.601741	0.133825	-0.417108	0.0642529	0.0692494	-0.390191	0.0861317	-0.334723	0.0310394	0.0530675	-0.535276	-0.509808	-0.202009	0.223292	0.362567	0.346883	0.671063	0.0884533	0.101989	-0.101989
XM_005175422	NO	blue	-0.0487958	-0.338941	0.623715	0.384335	0.710712	0.82292	0.741234	0.165379	0.259417	-0.329205	0.296634	-0.173949	0.149861	0.19878	-0.599283	0.106997	-0.163185	-0.0360993	-0.0299382	-0.657947	-0.628937	-0.395161	0.399789	0.0932993	0.194814	0.67377	0.142602	0.141637	-0.141637
XM_005175423	NO	blue	-0.000929204	0.335338	-0.293803	-0.166012	-0.363062	-0.820302	-0.632975	0.0267792	-0.137093	0.663446	-0.0116356	0.471925	-0.168007	-0.188306	0.297281	-0.209406	0.223047	0.0257834	-0.235046	0.339864	0.393757	0.0788991	-0.251639	-0.419005	-0.259817	-0.521117	-0.151188	-0.152413	0.152413
XM_005175456	NO	blue	0.0126415	-0.135255	0.00831768	-0.0843984	0.376422	0.312998	0.0445604	0.362844	0.316844	-0.315459	-0.15848	-0.234851	0.159771	0.0103429	-0.286999	-0.2597	-0.452003	0.135957	0.00914276	-0.00822939	0.00949562	0.161678	0.260119	0.278649	0.266618	0.337517	-0.0550282	0.2191	-0.2191
XM_005175457	NO	blue	-0.178745	-0.0397283	0.049703	-0.0600648	0.306097	0.680764	0.336718	0.127135	0.154358	-0.666382	-0.132265	-0.484222	-0.103174	-0.00297875	-0.468884	-0.0228766	-0.489099	0.132387	0.0207222	-0.328661	-0.18895	0.23627	0.411879	0.697253	0.718902	0.786123	0.00779445	0.178085	-0.178085
XM_005175461	NO	blue	0.0320524	-0.1733	0.190254	0.111419	0.519607	0.433495	0.379181	0.385605	0.0871323	-0.198607	0.260095	-0.0623979	-0.292067	-0.399241	-0.265976	-0.152877	-0.296437	-0.205582	0.0694858	-0.253357	-0.413801	-0.154036	0.130675	0.162125	0.0706032	0.341719	-0.121732	-0.0370789	0.0370789
XM_005175465	NO	blue	-0.0018956	-0.256841	0.38182	0.293491	0.453402	0.884554	0.615321	0.112727	0.0543014	-0.634954	0.0277497	-0.454635	-0.0883348	-0.024636	-0.4613	0.130161	-0.339251	0.151409	0.0867255	-0.473791	-0.406665	-0.0906489	0.265984	0.411231	0.348975	0.626433	-0.0159272	-0.0242723	0.0242723
XM_011293890	NO	blue	0.117236	-0.168415	0.308705	0.463219	0.369096	0.650019	0.550733	-0.030726	-0.0996989	-0.365655	0.163506	-0.193703	-0.229929	0.0190262	-0.311003	0.238373	-0.0110001	-0.0346548	-0.170751	-0.45943	-0.414428	-0.234361	0.0224146	0.0960607	0.200585	0.310729	-0.384561	-0.0270151	0.0270151
XM_020036630	NO	blue	-0.16141	-0.347197	0.31551	0.241514	0.254749	0.625732	0.376329	-0.235643	-0.148572	-0.538252	-0.185351	-0.45792	-0.0210262	0.0609504	-0.193447	0.395776	-0.0101756	0.219792	0.475921	-0.294919	-0.119693	0.0146519	0.246502	0.285099	-0.0673083	0.38107	0.138963	-0.179752	0.179752
XM_020036633	NO	blue	-0.412614	-0.435113	0.0846066	0.0763721	0.255807	0.703606	0.376183	-0.192453	0.021781	-0.714713	-0.24226	-0.5656	0.184385	0.242596	-0.247625	0.412177	-0.127487	0.11928	0.425557	-0.100663	-0.126913	0.141228	0.276094	0.488055	0.130215	0.364279	0.11698	-0.0591497	0.0591497
XM_005175475	NO	blue	-0.038237	-0.06091	-0.165299	-0.0577355	-0.431828	-0.541124	-0.221619	-0.556001	-0.3034	0.45842	0.0571284	0.310792	0.0605772	0.446689	0.528476	0.32688	0.688025	-0.289776	-0.0202432	0.357921	0.168537	-0.143572	-0.362008	-0.476219	-0.438903	-0.623378	-0.119328	-0.0124468	0.0124468
XM_011293948	NO	blue	-0.117755	-0.342671	-0.0799648	0.256625	0.498149	0.715234	0.415522	0.234778	0.0997789	-0.692711	0.0237396	-0.228828	-0.190791	-0.374606	-0.237581	0.3209	-0.301851	0.0914168	0.351034	-0.492128	-0.320817	0.152637	0.0396806	0.469391	0.112805	0.446296	-0.256879	-0.0311813	0.0311813
XM_005175495	NO	blue	-0.0048209	-0.228885	0.0302459	-0.0356927	0.254068	0.556853	0.308059	0.213661	0.405301	-0.547567	-0.0627017	-0.250696	0.166965	0.223174	-0.304838	-0.0128587	-0.345349	-0.13644	0.24655	-0.271468	-0.167943	0.154197	0.313891	0.441307	0.30323	0.576743	0.121124	0.393181	-0.393181
XM_020036794	NO	blue	0.00741152	-0.158531	0.2338	0.315507	0.429616	0.816358	0.575446	0.2154	-0.000845405	-0.632236	0.041728	-0.433562	-0.240253	-0.270692	-0.360593	0.0606803	-0.373037	0.0997311	0.0798495	-0.316784	-0.392008	-0.0528329	0.187895	0.422812	0.27415	0.503206	-0.16819	-0.0708397	0.0708397
XR_002194611	NO	blue	0.226025	0.369505	-0.196759	-0.148144	-0.394431	-0.565355	-0.42327	0.309	0.200342	0.431392	0.0782678	0.343375	-0.312642	-0.129736	0.254274	-0.561019	-0.182853	0.101733	-0.162345	0.209224	0.233703	0.0968136	-0.174158	-0.162695	-0.0330963	-0.173737	-0.100988	0.245026	-0.245026
XM_011294165	NO	blue	-0.0128317	0.0566143	-0.0335685	-0.0882699	-0.468279	-0.46055	-0.209469	-0.375383	-0.194777	0.327787	-0.117472	0.0947816	0.436115	0.201602	0.415946	0.250319	0.444429	-0.0487254	-0.00666829	0.371595	0.250456	-0.103267	-0.370554	-0.381427	-0.424118	-0.64616	0.300773	-0.260637	0.260637
XM_005175523	NO	blue	0.122717	0.218779	-0.164982	-0.314741	-0.752204	-0.754541	-0.460193	-0.52578	-0.456214	0.525675	-0.205111	0.0600703	0.0677905	0.228983	0.598355	-0.0414246	0.582362	-0.156875	-0.110262	0.709993	0.478497	-0.0181523	-0.148417	-0.401664	-0.340104	-0.763051	0.0261695	-0.328996	0.328996
XM_020036817	NO	blue	0.0045691	0.236697	-0.262757	-0.345749	-0.655801	-0.812463	-0.606125	-0.242219	-0.182016	0.573911	-0.191671	0.171994	-0.0283841	0.200579	0.368911	-0.289432	0.294414	-0.00442003	-0.116295	0.660702	0.517197	0.0957707	-0.0925659	-0.328206	-0.221459	-0.593029	0.0456767	-0.0457703	0.0457703
XM_011294140	NO	blue	0.0724538	0.0535877	-0.169002	-0.455419	-0.573901	-0.54201	-0.309072	-0.389335	-0.327826	0.296086	-0.233785	-0.0748161	0.202723	0.152708	0.612992	-0.0508412	0.486165	-0.00470361	0.140482	0.580584	0.390358	0.0370883	0.12182	-0.219449	-0.418223	-0.612234	0.234699	-0.39367	0.39367
XM_005175528	NO	blue	-0.0475216	0.0709403	-0.534289	-0.654154	-0.420373	-0.630667	-0.562123	-0.0856868	-0.178983	0.2534	-0.229186	0.12616	-0.300906	-0.155787	0.502862	-0.286908	0.153203	0.0608615	0.186649	0.359011	0.459847	0.378659	0.255045	0.0839257	-0.0987867	-0.27325	-0.0365463	-0.0777986	0.0777986
XM_005175531	NO	blue	0.0214323	0.358264	-0.485071	-0.39044	-0.706719	-0.817998	-0.733362	-0.381226	-0.304315	0.347627	-0.395416	0.0132057	0.154564	0.079976	0.467514	-0.0247847	0.27349	0.0613759	0.00925977	0.791948	0.684839	0.323859	-0.373581	-0.168418	-0.207611	-0.758915	0.105285	-0.210246	0.210246
XM_011294207	NO	blue	0.40504	0.513345	-0.138611	-0.290261	-0.618495	-0.774091	-0.621553	-0.0724283	-0.12404	0.535397	-0.208173	0.0791971	0.13974	0.0554903	0.270079	-0.481944	0.0534576	0.0632509	-0.197124	0.703542	0.546202	0.0945133	-0.215045	-0.321316	-0.116747	-0.553329	0.1907	-0.0686189	0.0686189
XM_005175541	NO	blue	0.300805	0.291474	0.0158344	-0.0338633	-0.509614	-0.673101	-0.309147	-0.122179	-0.0716639	0.613753	0.087747	0.320691	-0.0222907	0.141602	0.41004	-0.215974	0.31385	-0.210103	-0.0843116	0.407166	0.224121	-0.193167	-0.458213	-0.547141	-0.483724	-0.617644	0.139331	-0.0856099	0.0856099
XM_005175544	NO	blue	-0.115277	-0.298395	0.210321	0.416279	0.582498	0.600064	0.592797	0.4651	0.413566	-0.218857	0.508905	0.250031	0.0307919	-0.117832	-0.370222	0.139968	-0.200676	-0.383733	-0.0471231	-0.532269	-0.657887	-0.292056	0.0640167	0.042669	0.0860846	0.497726	-0.179163	0.285342	-0.285342
XM_020036986	NO	blue	-0.175193	-0.0569062	0.0973105	0.237708	0.167819	0.317601	0.194502	-0.128175	0.110103	-0.226072	-0.0273017	-0.169706	0.182116	0.439766	-0.388928	0.260923	-0.0587615	0.0399847	-0.131681	-0.0532662	-0.111994	-0.0462263	-0.210873	0.0608127	0.203615	0.137041	0.0209885	0.105033	-0.105033
XM_020037006	NO	blue	-0.0717845	-0.395352	-0.0775842	0.253207	0.613987	0.620313	0.243283	0.0825376	-0.128159	-0.592573	-0.102229	-0.328704	-0.262414	-0.274861	-0.247116	0.271331	-0.175663	0.0197351	0.228073	-0.207886	-0.172439	0.138974	0.0779535	0.337553	0.072797	0.209701	-0.611714	-0.0681728	0.0681728
XM_011294408	NO	blue	0.0699608	0.273892	-0.386413	-0.572346	-0.56226	-0.833638	-0.798888	-0.213607	-0.38054	0.458344	-0.419039	0.0034261	-0.16515	-0.125694	0.348481	-0.394081	0.140564	0.22912	-0.0139747	0.689495	0.714193	0.332398	0.0822446	-0.122081	-0.105225	-0.556936	0.079468	-0.252376	0.252376
XM_005175608	NO	blue	0.0397516	0.219768	-0.405756	-0.360344	-0.428048	-0.766941	-0.794842	-0.272693	-0.263381	0.397306	-0.340616	0.184828	-0.0972357	-0.0174587	0.260325	-0.0439119	0.258095	0.347564	0.0961096	0.335937	0.665852	0.378044	-0.0821957	-0.168652	-0.165934	-0.416438	0.0191733	-0.145484	0.145484
XM_005175610	NO	blue	0.14418	0.202836	-0.0286522	-0.266414	-0.391205	-0.378931	-0.4116	-0.186177	-0.125321	0.165194	-0.337129	-0.0512837	0.0369402	0.0287296	0.137238	-0.0992942	0.0395518	0.330326	0.0908703	0.02753	0.460086	0.244729	0.0135998	-0.00521062	0.0219465	-0.00852918	0.24886	-0.0767377	0.0767377
XM_005175613	NO	blue	0.436798	0.446715	-0.187815	-0.41353	-0.589976	-0.723398	-0.479387	0.111373	0.027138	0.549005	-0.000680289	0.290401	-0.113495	-0.0138875	0.415101	-0.617604	-0.00109953	0.0691522	-0.312686	0.288109	0.336883	0.0741182	-0.040701	-0.216854	0.0601713	-0.285417	0.031571	0.17111	-0.17111
XM_005175619	NO	blue	0.120927	0.273382	-0.368987	-0.245202	-0.54134	-0.848336	-0.684681	-0.177997	-0.427917	0.571073	-0.173294	0.287227	-0.214932	-0.323415	0.503855	-0.117186	0.345054	0.103253	-0.141137	0.484574	0.530973	0.156787	-0.268056	-0.362309	-0.307669	-0.712699	-0.25017	-0.386246	0.386246
XR_002194708	NO	blue	0.0152018	-0.135851	0.20364	0.065999	0.568773	0.695708	0.345774	0.354528	0.19889	-0.530595	-0.0300481	-0.418109	-0.147806	-0.157907	-0.620168	-0.269329	-0.588902	0.155217	0.0885892	-0.308124	-0.268579	0.0752283	0.493137	0.502218	0.480836	0.690128	0.00713709	0.186205	-0.186205
XM_005175620	NO	blue	0.162085	-0.108236	0.453809	-0.0565862	-0.0294326	0.325561	0.432725	-0.0492114	-0.109049	-0.108912	0.00396921	-0.391484	0.126018	0.123815	-0.0263517	-0.211992	0.0156194	-0.0906362	0.1157	0.114639	-0.200029	-0.309092	0.398032	0.00488013	-0.133352	0.0858201	0.400045	-0.184056	0.184056
XM_020037295	NO	blue	0.234251	0.269314	0.292626	0.382385	0.0809903	0.527175	0.467202	0.47341	0.352498	-0.290033	0.292334	-0.0501888	-0.248579	-0.157748	-0.261805	-0.285365	-0.558891	-0.0778481	-0.372866	-0.422116	-0.4261	-0.134724	-0.0302558	0.279577	0.575476	0.644716	-0.261054	0.348702	-0.348702
XM_011294682	NO	blue	0.317351	0.200016	0.0771889	-0.159061	0.291173	0.248211	-0.00762643	0.462303	0.365682	-0.247438	-0.109361	-0.282431	0.0910997	-0.0299492	-0.391952	-0.611109	-0.696152	0.180413	-0.133253	-0.0109203	0.00466439	0.160559	0.249419	0.347052	0.512899	0.423264	0.110962	0.357885	-0.357885
XM_011294692	NO	blue	-0.153786	0.0817542	-0.178052	-0.0159207	0.0774821	-0.322298	-0.297066	0.0316135	0.0428091	0.299073	0.0703841	0.311148	-0.100662	0.0587589	-0.0645977	-0.0648527	0.0399399	-0.0327816	-0.218579	0.135505	0.112619	0.0393919	-0.158508	-0.179205	0.0280113	-0.178653	-0.135751	0.100612	-0.100612
XM_020037330	NO	blue	0.134245	-0.165734	0.168507	0.136612	-0.0453042	0.320837	0.294285	0.0489746	0.124994	-0.283645	-0.0287088	-0.222424	0.277174	0.0114222	-0.0250836	0.125615	-0.0564927	-0.197415	0.301026	-0.0789933	-0.129155	-0.075012	-0.0412844	0.0820452	-0.16475	0.100444	0.157082	-0.0313553	0.0313553
XM_005175635	NO	blue	0.108455	0.222977	0.512522	0.536398	0.161456	0.652668	0.535904	0.0945545	0.168623	-0.396267	0.0961846	-0.314711	0.167348	0.0968104	-0.496451	0.151634	-0.254395	-0.129695	-0.146168	-0.277012	-0.33394	-0.217804	-0.12037	0.146958	0.28172	0.478757	0.140284	0.00381691	-0.00381691
XM_005175636	NO	blue	-0.211065	-0.447961	0.265037	0.318341	0.707331	0.967294	0.678143	0.131861	0.214528	-0.723574	0.0975906	-0.356819	0.0982809	0.0571662	-0.500717	0.343074	-0.30125	-0.00436101	0.241083	-0.540455	-0.51945	-0.0728196	0.233076	0.433292	0.249164	0.645828	0.00485229	0.117343	-0.117343
XM_011294754	NO	blue	0.0949205	0.25812	-0.116485	-0.146412	-0.50725	-0.910446	-0.484347	-0.215412	-0.169932	0.869733	0.154869	0.587936	-0.0316713	0.135039	0.418101	-0.124729	0.544144	-0.0935968	-0.261267	0.314085	0.271764	-0.179693	-0.255143	-0.668789	-0.426145	-0.653048	0.0651453	-0.100333	0.100333
XM_005175640	NO	blue	-0.158574	-0.121171	0.316674	0.157328	0.522128	0.703344	0.536161	0.42241	0.501487	-0.429438	0.179924	-0.205197	0.228834	0.064376	-0.551258	-0.15655	-0.521947	-0.0342721	-0.0555418	-0.436278	-0.475575	-0.121012	0.410007	0.367286	0.433616	0.69814	0.233951	0.311344	-0.311344
XM_005175642	NO	blue	0.0179803	0.0632116	-0.261266	-0.29007	-0.377287	-0.772776	-0.600826	-0.316032	-0.489704	0.567085	-0.144768	0.27428	-0.185999	-0.230498	0.451941	0.0262823	0.544243	0.146625	0.105979	0.376421	0.469648	0.0978331	0.00746121	-0.396288	-0.484661	-0.61377	-0.0697923	-0.436161	0.436161
XM_005175647	NO	blue	-0.0732296	-0.231742	0.284169	0.434665	0.554512	0.829482	0.54954	0.193258	0.142345	-0.632914	0.0684541	-0.351534	-0.0528136	-0.167928	-0.457474	0.24825	-0.379919	0.0639523	0.202115	-0.463517	-0.412722	-0.0528431	-0.0423903	0.36754	0.190563	0.537491	-0.0948648	0.0371899	-0.0371899
XM_005175649	NO	blue	0.306682	0.412179	-0.183589	-0.385464	-0.526889	-0.666435	-0.453945	-0.0894272	-0.0866466	0.448242	-0.124232	0.111421	0.121281	0.104412	0.398657	-0.406376	0.192475	-0.18706	-0.17037	0.536943	0.389422	0.0515972	-0.0742066	-0.257077	-0.15812	-0.518609	0.128868	-0.0876127	0.0876127
XM_011294813	NO	blue	0.137248	-0.0505914	0.563622	0.564551	0.482928	0.748217	0.584582	0.229341	0.192898	-0.345766	0.192829	-0.203018	-0.000167863	0.0146585	-0.733734	0.0935036	-0.283672	-0.00972296	-0.193675	-0.560387	-0.452471	-0.283448	0.0376637	0.0912268	0.319085	0.604954	-0.0227212	0.063434	-0.063434
XM_005175680	NO	blue	-0.0579454	-0.35223	0.317808	0.365324	0.636005	0.969853	0.727977	0.200334	0.259387	-0.684126	0.166613	-0.334817	0.0716431	0.0508269	-0.542999	0.239662	-0.330853	-0.11956	0.126163	-0.569321	-0.569427	-0.137801	0.171381	0.396525	0.310372	0.666118	-0.0483393	0.167967	-0.167967
XM_005175699	NO	blue	-0.0327878	0.0810153	-0.324901	0.171359	0.05355	-0.516903	-0.30387	0.311593	0.187384	0.503876	0.390684	0.779631	-0.218921	-0.326403	0.2043	0.0412323	0.12612	-0.127607	-0.125996	-0.0694438	-0.0459287	-0.0501093	-0.512497	-0.421341	-0.345795	-0.352408	-0.311734	0.0836472	-0.0836472
XR_891598	NO	blue	-0.245534	-0.106487	-0.286148	-0.382509	-0.352992	-0.553961	-0.254394	-0.438505	-0.323986	0.443238	0.028454	0.292415	-0.0937391	0.218697	0.527435	0.133815	0.624951	-0.199841	-0.0268505	0.207651	0.152355	-0.0405483	0.0911218	-0.273397	-0.301762	-0.503418	-0.043875	-0.162245	0.162245
XM_005175704	NO	blue	-0.144198	-0.342892	0.356695	0.245493	0.469536	0.84667	0.570476	-0.0814341	0.0567496	-0.611931	-0.0253068	-0.46072	0.061407	0.230802	-0.578722	0.279217	-0.1746	0.100752	0.126134	-0.460944	-0.35597	-0.0756656	0.351442	0.380784	0.348627	0.606467	0.0950997	0.0384395	-0.0384395
XM_005175705	NO	blue	0.00249531	0.364608	-0.499804	-0.0381964	-0.462279	-0.659303	-0.538818	0.191786	0.097173	0.383678	0.0654874	0.493252	-0.186451	-0.25089	0.360653	-0.110298	-0.0137987	-0.0765016	-0.162264	0.364518	0.303822	0.222429	-0.544866	-0.185693	-0.0979855	-0.396493	-0.284331	0.14196	-0.14196
XM_005175714	NO	blue	-0.208701	-0.347199	0.324091	0.341531	0.348863	0.748858	0.577019	-0.113683	0.09657	-0.57801	-0.0219297	-0.418461	0.255014	0.217566	-0.345145	0.415498	-0.0597922	-0.189763	0.331831	-0.232229	-0.336869	-0.136378	0.0677725	0.243362	-0.0312632	0.324201	0.176813	-0.00990326	0.00990326
XM_005175717	NO	blue	0.245871	0.52933	0.117117	-0.302431	-0.80713	-0.642077	-0.389415	-0.322684	-0.171423	0.513159	-0.20179	-0.0373754	0.203413	0.337946	0.244211	-0.367752	0.217946	-0.0664545	-0.289669	0.550696	0.443921	-0.0385534	0.00493752	-0.268771	0.0518982	-0.311244	0.390361	-0.0435478	0.0435478
XM_005175723	NO	blue	-0.0462357	0.180076	-0.497969	-0.36902	-0.354608	-0.75981	-0.78149	-0.059197	-0.106736	0.377343	-0.267029	0.282221	-0.219958	-0.166468	0.349062	-0.166095	0.0546776	0.356634	0.163829	0.264897	0.585613	0.418411	-0.131811	-0.0850734	-0.176892	-0.337136	-0.053009	0.0658468	-0.0658468
XM_011295220	NO	blue	0.025072	0.309389	-0.454343	-0.564648	-0.738727	-0.883903	-0.78461	-0.259841	-0.251452	0.447239	-0.408389	0.0334584	0.0838064	0.0817408	0.514063	-0.304169	0.203902	0.0537672	-0.014997	0.842119	0.724647	0.326025	-0.0556303	-0.154965	-0.160346	-0.658219	0.102471	-0.150361	0.150361
XM_011295273	NO	blue	-0.065602	-0.296111	0.181311	0.367532	0.574505	0.827444	0.721708	0.237693	0.238364	-0.592925	0.283533	-0.170284	-0.0177698	-0.10297	-0.259173	0.280222	-0.247889	-0.132636	0.134352	-0.545655	-0.624613	-0.17148	-0.0109038	0.312301	0.118758	0.451015	-0.1082	0.104453	-0.104453
[truncated: 17,115 more rows]

## Sheet: SuppFile1E
Supplementary File 1E - Summary of gene ontology (GO) terms enriched within WGCNA module A.
GO category	Term	Adjusted P-value	No. Genes	Genes
[truncated: 18 more rows]

## Sheet: SuppFile1F
Supplementary File 1F - Summary of adjacency values and connection scores (Ci) for genes connected to Obp56h genes. The 100 genes with highest Ci were classified as “central genes” with strong connections to Obp56h genes.
[truncated: 18,012 more rows]

[truncated: 2 more sheets: SuppFile1G, SuppFile1H]
